# Supplementary material
Source: publisher site journal article supplement (https://www.spandidos-publications.com/6485/downloadSupplementary)
Supplement: Supplementary file 1 [file downloadSupplementary]

## Sheet: PeptideGroups
Table SVI.Peptide identification
Sequence	Modifications	Qvality PEP	Qvality q-value	# PSMs	Master Protein Accessions	GeneName	Master Protein Descriptions	# Missed Cleavages	Theo. MH+ [Da]	Abundances NC1	Abundances NC2	Abundances NC3	Abundances KD1	Abundances KD2	Abundances KD3	Charge Mascot	DeltaM [ppm] Mascot	Deltam/z [Da] Mascot	RT [min] Mascot	Ions Score Mascot
AAAAAAAAAAGAAGGR	1xAcetyl [N-Term]; 1xTMT6plex [N-Term]	7.61476e-06	0	2	Q86U42	PABPN1	Polyadenylate-binding protein 2 OS=Homo sapiens OX=9606 GN=PABPN1 PE=1 SV=3	0	1469.8							2	-155911	-114.579	28.368	54
AAAAAAAAAPAAAATAPTTAATTAATAAQ	1xTMT6plex [N-Term]	6.82517e-06	0	1	P37108	SRP14	Signal recognition particle 14 kDa protein OS=Homo sapiens OX=9606 GN=SRP14 PE=1 SV=2	0	2597.37	107	99.5	96.5	103.2	94.8	98.9	3	3.16	0.00274	29.7937	43
AAAAAAAGDSDSWDADAFSVEDPVR	1xAcetyl [N-Term]; 1xTMT6plex [N-Term]	9.43947e-06	0	2	O75822	EIF3J	Eukaryotic translation initiation factor 3 subunit J OS=Homo sapiens OX=9606 GN=EIF3J PE=1 SV=2	0	2736.26							2	-83747.7	-114.578	45.8415	94
AAAAAAAGDSDSWDADAFSVEDPVRK	1xAcetyl [N-Term]; 1xTMT6plex [K26]; 1xTMT6plex [N-Term]	2.73671e-07	0	1	O75822	EIF3J	Eukaryotic translation initiation factor 3 subunit J OS=Homo sapiens OX=9606 GN=EIF3J PE=1 SV=2	1	3093.52	105	99.5	101.7	95	97.1	101.6	3	-74076.2	-76.3853	39.9497	60
AAAAAAALQAK	1xTMT6plex [K11]; 1xTMT6plex [N-Term]	1.91163e-06	0	3	P36578	RPL4	60S ribosomal protein L4 OS=Homo sapiens OX=9606 GN=RPL4 PE=1 SV=5	0	1414.88	103.4	103.6	102.4	97.8	97.9	94.8	2	1.3	0.00092	21.2816	69
AAAAAAGAASGLPGPVAQGLK	1xAcetyl [N-Term]; 1xTMT6plex [K21]; 1xTMT6plex [N-Term]	0.000125646	2.77511e-05	2	Q96P70	IPO9	Importin-9 OS=Homo sapiens OX=9606 GN=IPO9 PE=1 SV=3	0	2249.3							2	-101880	-114.579	38.2688	61
AAAAAASAGSSASSGNQPPQELGLGELLEEFSR	1xTMT6plex [N-Term]	2.58321e-08	0	1	Q8NCE2	MTMR14	Myotubularin-related protein 14 OS=Homo sapiens OX=9606 GN=MTMR14 PE=1 SV=2	0	3402.7	97.7	114.3	100.5	91.8	90.7	105.1	4	1.27	0.00108	51.9244	65
AAAAAATAAAAASIR	1xAcetyl [N-Term]; 1xTMT6plex [N-Term]	6.15408e-05	1.80381e-05	1	Q8WVM8	SCFD1	Sec1 family domain-containing protein 1 OS=Homo sapiens OX=9606 GN=SCFD1 PE=1 SV=4	0	1528.86							2	-149888	-114.579	36.3816	49
AAAAAEQQQFYLLLGNLLSPDNVVR	1xAcetyl [N-Term]; 1xTMT6plex [N-Term]	6.49557e-06	0	6	O00410	IPO5	Importin-5 OS=Homo sapiens OX=9606 GN=IPO5 PE=1 SV=4	0	2972.6							2	-77087.7	-114.576	55.693	108
AAAAASAPQQLSDEELFSQLR	1xAcetyl [N-Term]; 1xTMT6plex [N-Term]	5.68088e-05	1.80381e-05	2	Q9Y2U8	LEMD3	Inner nuclear membrane protein Man1 OS=Homo sapiens OX=9606 GN=LEMD3 PE=1 SV=2	0	2474.27							2	-92618.4	-114.582	45.522	85
AAAAATVVPPMVGGPPFVGPVGFGPGDR	1xTMT6plex [N-Term]	3.11507e-06	0	2	Q9BTD8	RBM42	RNA-binding protein 42 OS=Homo sapiens OX=9606 GN=RBM42 PE=1 SV=1	0	2820.51	107.8	99.6	106.2	102.4	92.7	91.5	4	2.05	0.00144	46.6882	30
AAAACLDK	1xCarbamidomethyl [C5]; 1xTMT6plex [K8]; 1xTMT6plex [N-Term]	0.00167132	0.000174676	1	Q9H3U1	UNC45A	Protein unc-45 homolog A OS=Homo sapiens OX=9606 GN=UNC45A PE=1 SV=1	0	1277.73	101.1	93.1	96.8	100.5	102	106.5	2	2.41	0.00154	14.6316	23
AAAAECDVVMAATEPELLDDQEAK	1xAcetyl [N-Term]; 1xCarbamidomethyl [C6]; 1xTMT6plex [K24]; 1xTMT6plex [N-Term]	2.20703e-05	0	1	Q99615	DNAJC7	DnaJ homolog subfamily C member 7 OS=Homo sapiens OX=9606 GN=DNAJC7 PE=1 SV=2	0	3047.5	94.2	103	99.7	106.6	93	103.5	3	-75193.4	-76.3838	51.3862	89
AAAAECDVVMAATEPELLDDQEAKR	1xAcetyl [N-Term]; 1xCarbamidomethyl [C6]; 1xTMT6plex [K24]; 1xTMT6plex [N-Term]	1.10148e-05	0	1	Q99615	DNAJC7	DnaJ homolog subfamily C member 7 OS=Homo sapiens OX=9606 GN=DNAJC7 PE=1 SV=2	1	3203.6							3	-71531.2	-76.3858	44.9522	59
AAAAELSLLEK	1xAcetyl [N-Term]; 1xTMT6plex [K11]; 1xTMT6plex [N-Term]	0.00128025	0.000142151	1	O43324	EEF1E1	Eukaryotic translation elongation factor 1 epsilon-1 OS=Homo sapiens OX=9606 GN=EEF1E1 PE=1 SV=1	0	1615.97	103.7	105.5	93.9	92.2	104.5	100.1	2	-141809	-114.579	45.6871	56
AAAAGAAAAAAAEGEAPAEMGALLLEK	1xAcetyl [N-Term]; 1xTMT6plex [K27]; 1xTMT6plex [N-Term]	5.91304e-05	1.80381e-05	1	Q96KQ7	EHMT2	Histone-lysine N-methyltransferase EHMT2 OS=Homo sapiens OX=9606 GN=EHMT2 PE=1 SV=3	0	2896.55	103	93.2	96.7	101.2	96.6	109.4	3	-79108	-76.3801	53.9357	100
AAAAGSLDR	1xTMT6plex [N-Term]	0.0131329	0.0010788	1	Q9Y2U8	LEMD3	Inner nuclear membrane protein Man1 OS=Homo sapiens OX=9606 GN=LEMD3 PE=1 SV=2	0	1060.59	98.7	95.5	96.3	95.7	100.2	113.6	2	-0.52	-0.00028	9.6472	18
AAAAKPNNLSLVVHGPGDLR	1xAcetyl [N-Term]; 1xTMT6plex [K5]; 1xTMT6plex [N-Term]	0.000213012	2.77511e-05	1	Q00796	SORD	Sorbitol dehydrogenase OS=Homo sapiens OX=9606 GN=SORD PE=1 SV=4	0	2500.44	100	95.1	104.1	95.6	95.6	109.7	3	-91646.5	-76.3855	27.0059	49
AAAALGSSSGSASPAVAELCQNTPETFLEASK	1xAcetyl [N-Term]; 1xCarbamidomethyl [C20]; 1xTMT6plex [K32]; 1xTMT6plex [N-Term]	0.00135605	0.000142151	1	Q96IV0	NGLY1	Peptide-N(4)-(N-acetyl-beta-glucosaminyl)asparagine amidase OS=Homo sapiens OX=9606 GN=NGLY1 PE=1 SV=1	0	3622.83	99.8	101.8	96	91.5	101.6	109.3	3	-63254.5	-76.3867	50.087	24
AAAALMQDR	1xTMT6plex [N-Term]	0.0375985	0.0023094	1	Q13671	RIN1	Ras and Rab interactor 1 OS=Homo sapiens OX=9606 GN=RIN1 PE=1 SV=4	0	1175.64							2	6.87	0.00404	16.3263	4
AAAAPGASPSPGGDAAWSEAGPGPRPLAR	1xTMT6plex [N-Term]	0.000232697	2.77511e-05	1	P52701	MSH6	DNA mismatch repair protein Msh6 OS=Homo sapiens OX=9606 GN=MSH6 PE=1 SV=2	0	2871.47							3	2.84	0.00271	21.9637	26
AAAAQLSLTQLSSGNPVYEK	1xAcetyl [N-Term]; 1xTMT6plex [K20]; 1xTMT6plex [N-Term]	4.16644e-05	0	1	P42566	EPS15	Epidermal growth factor receptor substrate 15 OS=Homo sapiens OX=9606 GN=EPS15 PE=1 SV=2	0	2548.4	96.5	99	102.6	102.1	97.7	102.1	2	-89920.4	-114.577	45.0923	102
AAAASAAEAGIATTGTEDSDDALLK	1xTMT6plex [K25]; 1xTMT6plex [N-Term]	2.34667e-07	0	1	P55036	PSMD4	26S proteasome non-ATPase regulatory subunit 4 OS=Homo sapiens OX=9606 GN=PSMD4 PE=1 SV=1	0	2778.44	103.9	94.6	101.6	96.1	100.1	103.7	4	-0.48	-0.00033	33.1427	49
AAAAVEPDVVVK	1xTMT6plex [K12]; 1xTMT6plex [N-Term]	0.000189412	2.77511e-05	1	Q9BQE4	SELENOS	Selenoprotein S OS=Homo sapiens OX=9606 GN=SELENOS PE=1 SV=3	0	1626.98							2	0.68	0.00055	23.2499	59
AAAAVSESWPELELAER	1xAcetyl [N-Term]; 1xTMT6plex [N-Term]	2.07575e-05	0	3	Q8N1G4	LRRC47	Leucine-rich repeat-containing protein 47 OS=Homo sapiens OX=9606 GN=LRRC47 PE=1 SV=1	0	2100.08							2	-109117	-114.578	48.649	82
AAAAVVAAAAR	1xTMT6plex [N-Term]	4.2469e-05	0	1	Q8WWH5	TRUB1	Probable tRNA pseudouridine synthase 1 OS=Homo sapiens OX=9606 GN=TRUB1 PE=1 SV=1	0	1170.72	91.6	90.3	93.3	88.6	92.8	143.4	2	3.23	0.00189	17.8511	47
AAAAVVEFQR	1xAcetyl [N-Term]; 1xTMT6plex [N-Term]	0.000340203	3.92285e-05	1	O00231	PSMD11	26S proteasome non-ATPase regulatory subunit 11 OS=Homo sapiens OX=9606 GN=PSMD11 PE=1 SV=3	0	1332.75							2	-171947	-114.581	29.5549	61
AAAAVVVPAEWIK	1xAcetyl [N-Term]; 1xTMT6plex [K13]; 1xTMT6plex [N-Term]	0.000338723	3.92285e-05	1	Q8NI27	THOC2	THO complex subunit 2 OS=Homo sapiens OX=9606 GN=THOC2 PE=1 SV=2	0	1825.1	97.6	98	114.4	87.7	103.5	98.8	2	-125560	-114.58	49.8248	61
AAADGDDSLYPIAVLIDELR	1xAcetyl [N-Term]; 1xTMT6plex [N-Term]	1.20212e-05	0	3	P30153	PPP2R1A	Serine/threonine-protein phosphatase 2A 65 kDa regulatory subunit A alpha isoform OS=Homo sapiens OX=9606 GN=PPP2R1A PE=1 SV=4	0	2388.25							2	-95947.7	-114.573	56.0493	107
AAADSDPNLDPLMNPHIR	1xTMT6plex [N-Term]	0.000450204	3.92285e-05	1	O95159	ZFPL1	Zinc finger protein-like 1 OS=Homo sapiens OX=9606 GN=ZFPL1 PE=1 SV=2	0	2176.1							3	6.18	0.00448	26.388	8
AAADTLQGPMQAAYR	1xTMT6plex [N-Term]	6.00909e-06	0	1	Q6P2E9	EDC4	Enhancer of mRNA-decapping protein 4 OS=Homo sapiens OX=9606 GN=EDC4 PE=1 SV=1	0	1792.92	92.3	95.2	96.8	109.3	109.2	97.2	2	1.55	0.00139	23.6556	51
AAAEAAAEAK	1xTMT6plex [K10]; 1xTMT6plex [N-Term]	5.11289e-05	1.80381e-05	1	Q9UNF1	MAGED2	Melanoma-associated antigen D2 OS=Homo sapiens OX=9606 GN=MAGED2 PE=1 SV=2	0	1360.78	97.8	95.1	94.9	107.3	95.8	109	2	3.65	0.00249	13.0279	34
AAAEDVNVTFEDQQK	1xTMT6plex [K15]; 1xTMT6plex [N-Term]	7.88815e-06	0	1	Q9NQP4	PFDN4	Prefoldin subunit 4 OS=Homo sapiens OX=9606 GN=PFDN4 PE=1 SV=1	0	2123.1	96.9	106.4	98.2	104.9	97.1	96.4	3	2.65	0.00187	24.871	56
AAAEELLAR	1xTMT6plex [N-Term]	0.000124789	2.77511e-05	1	O15357	INPPL1	Phosphatidylinositol 3,4,5-trisphosphate 5-phosphatase 2 OS=Homo sapiens OX=9606 GN=INPPL1 PE=1 SV=2	0	1172.68							2	2.07	0.00121	21.3677	23
AAAEEQIK	1xTMT6plex [K8]; 1xTMT6plex [N-Term]	0.000667914	7.57932e-05	1	Q96P70	IPO9	Importin-9 OS=Homo sapiens OX=9606 GN=IPO9 PE=1 SV=3	0	1317.78	102.6	109.3	99.3	94.8	98.2	95.7	2	2.35	0.00155	13.4423	37
AAAEGLMSLLR	1xTMT6plex [N-Term]	5.96787e-05	1.80381e-05	1	P30260	CDC27	Cell division cycle protein 27 homolog OS=Homo sapiens OX=9606 GN=CDC27 PE=1 SV=2	0	1360.78	105.9	102.3	105	97.7	92.3	96.8	2	3.17	0.00216	41.4026	24
AAAEIYEEFLAAFEGSDGNK	1xTMT6plex [K20]; 1xTMT6plex [N-Term]	1.33852e-07	0	2	O15042	U2SURP	U2 snRNP-associated SURP motif-containing protein OS=Homo sapiens OX=9606 GN=U2SURP PE=1 SV=2	0	2590.31	100.8	103.7	105.9	98.1	105	86.5	2	5.73	0.00742	54.6832	105
AAAEQAISVR	1xTMT6plex [N-Term]	0.000384826	3.92285e-05	1	Q01780	EXOSC10	Exosome component 10 OS=Homo sapiens OX=9606 GN=EXOSC10 PE=1 SV=2	0	1244.72							2	3.02	0.00188	14.3862	40
AAAEVADTQLMLGVGLIEK	1xAcetyl [N-Term]; 1xTMT6plex [K19]; 1xTMT6plex [N-Term]	0.000595103	5.20452e-05	1	Q8TCE6	DENND10	DENN domain-containing protein 10 OS=Homo sapiens OX=9606 GN=DENND10 PE=1 SV=1	0	2429.37	82	100.7	91.3	102	123.9	100.1	3	-94328.2	-76.3861	54.5437	52
AAAEVAGQFVIK	1xTMT6plex [K12]; 1xTMT6plex [N-Term]	1.15146e-06	0	2	P02786	TFRC	Transferrin receptor protein 1 OS=Homo sapiens OX=9606 GN=TFRC PE=1 SV=2	0	1662	97	93.2	106.8	100.7	101.8	100.4	2	1.47	0.00122	31.9968	56
AAAEVNQDYGLDPK	1xTMT6plex [K14]; 1xTMT6plex [N-Term]	1.7378e-07	0	3	P07954	FH	Fumarate hydratase, mitochondrial OS=Homo sapiens OX=9606 GN=FH PE=1 SV=3	0	1949.04	96.8	109.5	98.6	99.7	99.8	95.6	2	1.24	0.00121	23.6434	72
AAAFEEQENETVVVK	1xTMT6plex [K15]; 1xTMT6plex [N-Term]	9.12371e-09	0	3	Q9Y490	TLN1	Talin-1 OS=Homo sapiens OX=9606 GN=TLN1 PE=1 SV=3	0	2122.14	94.5	94.6	91.4	108.2	106.5	104.7	2	3.4	0.00361	26.7402	108
AAAFEQLQK	1xTMT6plex [K9]; 1xTMT6plex [N-Term]	0.000112046	2.77511e-05	1	O94826	TOMM70	Mitochondrial import receptor subunit TOM70 OS=Homo sapiens OX=9606 GN=TOMM70 PE=1 SV=1	0	1463.86	111	109.2	104.7	90.5	94.1	90.5	2	2.5	0.00183	24.1629	49
AAAGARPVELGFAESAPAWRLRSEQFPSK	1xAcetyl [N-Term]; 1xTMT6plex [K29]; 1xTMT6plex [N-Term]	0.216418	0.00703455	2	Q16342	PDCD2	Programmed cell death protein 2 OS=Homo sapiens OX=9606 GN=PDCD2 PE=1 SV=2	2	3599.95							3	-63656.9	-76.3872	56.0385	3
AAAGEAK	1xTMT6plex [K7]; 1xTMT6plex [N-Term]	0.00926665	0.00067718	1	Q9P2E9	RRBP1	Ribosome-binding protein 1 OS=Homo sapiens OX=9606 GN=RRBP1 PE=1 SV=5	0	1075.65	91.4	95.8	96.9	104.9	103.6	107.4	2	4.76	0.00256	8.2406	20
AAAGEDYK	1xTMT6plex [K8]; 1xTMT6plex [N-Term]	0.00176448	0.000185426	1	P23381	WARS	Tryptophan--tRNA ligase, cytoplasmic OS=Homo sapiens OX=9606 GN=WARS PE=1 SV=2	0	1282.7	100.5	91.7	95.3	104.8	105.8	101.9	2	3.85	0.00247	11.6107	24
AAAGEFADDPCSSVK	1xCarbamidomethyl [C11]; 1xTMT6plex [K15]; 1xTMT6plex [N-Term]	5.30251e-07	0	2	P35221	CTNNA1	Catenin alpha-1 OS=Homo sapiens OX=9606 GN=CTNNA1 PE=1 SV=1	0	1982.99	103.6	100.1	102.7	99.3	95.7	98.6	2	2.19	0.00217	21.9774	89
AAAGELQEDSGLCVLAR	1xCarbamidomethyl [C13]; 1xTMT6plex [N-Term]	1.28445e-10	0	3	Q96C19	EFHD2	EF-hand domain-containing protein D2 OS=Homo sapiens OX=9606 GN=EFHD2 PE=1 SV=1	0	1989.03	101	95.6	97.1	100.5	103.8	102	2	0.74	0.00074	30.0357	86
AAAGELQEDSGLMALAK	1xTMT6plex [K17]; 1xTMT6plex [N-Term]	3.15974e-06	0	1	Q9BUP0	EFHD1	EF-hand domain-containing protein D1 OS=Homo sapiens OX=9606 GN=EFHD1 PE=1 SV=1	0	2133.16							3	4.03	0.00287	36.7001	38
AAAGLGGGDSGDGTAR	1xTMT6plex [N-Term]	1.01997e-07	0	1	Q96T51	RUFY1	RUN and FYVE domain-containing protein 1 OS=Homo sapiens OX=9606 GN=RUFY1 PE=1 SV=2	0	1561.78	94.7	102.6	85.9	107.6	105.3	104	2	3.36	0.00263	10.9291	54
AAAGLLPGGK	1xTMT6plex [K10]; 1xTMT6plex [N-Term]	0.000640702	7.57932e-05	2	Q5VSL9	STRIP1	Striatin-interacting protein 1 OS=Homo sapiens OX=9606 GN=STRIP1 PE=1 SV=1	0	1312.84							2	1.55	0.00102	22.1558	14
AAAGQESEGPAVGPPQPLGK	1xTMT6plex [K20]; 1xTMT6plex [N-Term]	8.74583e-08	0	1	O14497	ARID1A	AT-rich interactive domain-containing protein 1A OS=Homo sapiens OX=9606 GN=ARID1A PE=1 SV=3	0	2319.27	102.5	121.6	107.5	85.5	91.8	91	3	3.28	0.00253	22.5808	46
AAAHHYGAQCDKPNK	1xCarbamidomethyl [C10]; 2xTMT6plex [K12; K15]; 1xTMT6plex [N-Term]	5.16991e-08	0	3	P51970	NDUFA8	NADH dehydrogenase [ubiquinone] 1 alpha subcomplex subunit 8 OS=Homo sapiens OX=9606 GN=NDUFA8 PE=1 SV=3	0	2355.26	92.9	100.9	94.2	112.8	103.2	96.1	3	1.68	0.00132	8.378	26
AAALAAAVAQDPAASGAPSS	1xTMT6plex [N-Term]	8.68997e-05	2.77511e-05	2	Q8TAE8	GADD45GIP1	Growth arrest and DNA damage-inducible proteins-interacting protein 1 OS=Homo sapiens OX=9606 GN=GADD45GIP1 PE=1 SV=1	0	1926.01	104.4	104.3	99.3	101.2	93	97.8	3	4.75	0.00305	33.8048	40
AAALASGCTVEIK	1xCarbamidomethyl [C8]; 1xTMT6plex [K13]; 1xTMT6plex [N-Term]	2.12309e-07	0	1	Q8IYS1	PM20D2	Peptidase M20 domain-containing protein 2 OS=Homo sapiens OX=9606 GN=PM20D2 PE=1 SV=2	0	1749	109.9	105.3	108.7	85.6	96.8	93.8	2	-0.27	-0.00024	24.367	71
AAALATVNAWAEQTGMK	1xTMT6plex [K17]; 1xTMT6plex [N-Term]	5.71443e-08	0	2	Q14008	CKAP5	Cytoskeleton-associated protein 5 OS=Homo sapiens OX=9606 GN=CKAP5 PE=1 SV=3	0	2191.19	111.3	108.6	108.7	89.9	97.5	84	2	2.93	0.00322	42.7348	83
AAALCNACELSGK	2xCarbamidomethyl [C5; C8]; 1xTMT6plex [K13]; 1xTMT6plex [N-Term]	9.22781e-08	0	1	Q7Z392	TRAPPC11	Trafficking protein particle complex subunit 11 OS=Homo sapiens OX=9606 GN=TRAPPC11 PE=1 SV=2	0	1822.96	96.8	96	89	107.3	103.5	107.5	2	4.52	0.00412	23.2577	77
AAALEAMK	1xTMT6plex [K8]; 1xTMT6plex [N-Term]	0.00131125	0.000142151	2	P31948	STIP1	Stress-induced-phosphoprotein 1 OS=Homo sapiens OX=9606 GN=STIP1 PE=1 SV=1	0	1262.75	95.2	96.2	106.5	102.2	98.6	101.4	2	3.62	0.00229	22.7214	35
AAALEAMKDYTK	2xTMT6plex [K8; K12]; 1xTMT6plex [N-Term]	0.000674121	7.57932e-05	1	P31948	STIP1	Stress-induced-phosphoprotein 1 OS=Homo sapiens OX=9606 GN=STIP1 PE=1 SV=1	1	1999.15							3	3.09	0.00206	28.9265	3
AAALEFLNR	1xTMT6plex [N-Term]	0.000244384	2.77511e-05	1	P31948	STIP1	Stress-induced-phosphoprotein 1 OS=Homo sapiens OX=9606 GN=STIP1 PE=1 SV=1	0	1233.72	110	107.4	113.8	90.2	91.3	87.2	2	1.16	0.00072	30.5615	22
AAALEFLNRFEEAK	1xTMT6plex [K14]; 1xTMT6plex [N-Term]	0.000428407	3.92285e-05	1	P31948	STIP1	Stress-induced-phosphoprotein 1 OS=Homo sapiens OX=9606 GN=STIP1 PE=1 SV=1	1	2067.16							3	2.28	0.00157	42.0051	9
AAALEQFK	1xTMT6plex [K8]; 1xTMT6plex [N-Term]	0.00215519	0.000201691	2	Q13423	NNT	NAD(P) transhydrogenase, mitochondrial OS=Homo sapiens OX=9606 GN=NNT PE=1 SV=3	0	1335.8	97.1	103.1	95.6	101.9	103.3	99	2	1.26	0.00084	25.3856	22
AAALGASGGAGAGDDDFDQFDKPGAER	1xAcetyl [N-Term]; 1xTMT6plex [K22]; 1xTMT6plex [N-Term]	1.03076e-06	0	1	Q96EV2	RBM33	RNA-binding protein 33 OS=Homo sapiens OX=9606 GN=RBM33 PE=1 SV=3	0	3066.48	91.6	97.5	96.4	111.9	98.4	104.2	3	-74726.6	-76.3826	33.6319	54
AAAIGIDLGTTYSCVGVFQHGK	1xCarbamidomethyl [C14]; 1xTMT6plex [K22]; 1xTMT6plex [N-Term]	5.98261e-09	0	3	P0DMV8	HSPA1A	Heat shock 70 kDa protein 1A OS=Homo sapiens OX=9606 GN=HSPA1A PE=1 SV=1	0	2723.46	98.3	101	121.7	90.5	92.7	95.8	3	3.22	0.00293	38.3646	86
AAAIGITQVVISR	1xTMT6plex [N-Term]	1.73606e-06	0	1	Q96NB2	SFXN2	Sideroflexin-2 OS=Homo sapiens OX=9606 GN=SFXN2 PE=1 SV=2	0	1527.94							2	3.72	0.00284	30.5058	30
AAALLAK	1xTMT6plex [K7]; 1xTMT6plex [N-Term]	0.0329231	0.00214298	1	Q92575	UBXN4	UBX domain-containing protein 4 OS=Homo sapiens OX=9606 GN=UBXN4 PE=1 SV=2	0	1115.76	111.8	104.3	104.2	94.6	98	87	2	3.32	0.00185	21.79	18
AAALLMLTK	1xTMT6plex [K9]; 1xTMT6plex [N-Term]	0.000110207	2.77511e-05	1	O95273	CCNDBP1	Cyclin-D1-binding protein 1 OS=Homo sapiens OX=9606 GN=CCNDBP1 PE=1 SV=2	0	1389.89	93.5	98.8	102.7	99.8	98.7	106.6	2	3.38	0.00235	38.8127	42
AAAIQTMSLDAER	1xTMT6plex [N-Term]	4.30548e-06	0	2	O75326	SEMA7A	Semaphorin-7A OS=Homo sapiens OX=9606 GN=SEMA7A PE=1 SV=1	0	1605.85	84.9	80.2	84.8	129.2	108	112.8	2	5.37	0.00431	24.5495	39
AAAISTSR	1xTMT6plex [N-Term]	0.00269863	0.000212306	1	Q9NVU7	SDAD1	Protein SDA1 homolog OS=Homo sapiens OX=9606 GN=SDAD1 PE=1 SV=3	0	1005.59	107.9	104.7	105.4	89.4	93.4	99.1	2	5.23	0.00263	9.0411	17
AAAMAAAAAETSQR	1xTMT6plex [N-Term]	1.76915e-07	0	1	Q9NV92	NDFIP2	NEDD4 family-interacting protein 2 OS=Homo sapiens OX=9606 GN=NDFIP2 PE=1 SV=2	0	1548.8	92.2	87.3	99.2	112.2	99.5	109.6	2	4.22	0.00327	19.5111	65
AAAMANNLQK	1xTMT6plex [K10]; 1xTMT6plex [N-Term]	0.00411175	0.000304142	1	Q14498	RBM39	RNA-binding protein 39 OS=Homo sapiens OX=9606 GN=RBM39 PE=1 SV=2	0	1489.86	104.2	100.4	103.5	92.8	100.7	98.3	3	4.98	0.00248	17.6694	37
AAAMDVDTPSGTNSGAGK	1xAcetyl [N-Term]; 1xTMT6plex [K18]; 1xTMT6plex [N-Term]	2.65781e-05	0	2	P62877	RBX1	E3 ubiquitin-protein ligase RBX1 OS=Homo sapiens OX=9606 GN=RBX1 PE=1 SV=1	0	2150.08	100.8	107	103.7	95.3	95.3	98	2	-106582	-114.58	22.8401	92
AAANEQLTR	1xTMT6plex [N-Term]	0.000242387	2.77511e-05	2	Q9NX63	CHCHD3	MICOS complex subunit MIC19 OS=Homo sapiens OX=9606 GN=CHCHD3 PE=1 SV=1	0	1202.67	113.4	104	112.6	88.9	88.8	92.3	2	6.13	0.00369	9.3059	24
AAAPAPEEEMDECEQALAAEPK	1xCarbamidomethyl [C13]; 1xTMT6plex [K22]; 1xTMT6plex [N-Term]	1.68782e-08	0	2	P26641	EEF1G	Elongation factor 1-gamma OS=Homo sapiens OX=9606 GN=EEF1G PE=1 SV=3	0	2815.35	104.1	100.9	86.7	105.4	101.9	101	2	0.28	0.00039	32.1328	108
AAAPAPVSEAVCR	1xCarbamidomethyl [C12]; 1xTMT6plex [N-Term]	1.69527e-05	0	3	P20810	CAST	Calpastatin OS=Homo sapiens OX=9606 GN=CAST PE=1 SV=4	0	1527.82	95.9	97.6	101.3	101.6	97.4	106.3	2	1.54	0.00118	15.4738	46
AAAPCIIFFDELDSLAPSR	1xCarbamidomethyl [C5]; 1xTMT6plex [N-Term]	1.64342e-05	0	1	Q13608	PEX6	Peroxisome assembly factor 2 OS=Homo sapiens OX=9606 GN=PEX6 PE=1 SV=2	0	2322.2	103.9	103.6	103.9	97.8	86.5	104.3	3	9.53	0.00738	53.5317	31
AAAPDVAPAPGPAPR	1xTMT6plex [N-Term]	0.000206373	2.77511e-05	1	Q96D96	HVCN1	Voltage-gated hydrogen channel 1 OS=Homo sapiens OX=9606 GN=HVCN1 PE=1 SV=1	0	1586.89	97	97.7	94.7	102.3	100.6	107.8	2	2.98	0.00237	14.7903	36
AAAPGVEDEPLLR	1xTMT6plex [N-Term]	8.967e-07	0	1	P31350	RRM2	Ribonucleoside-diphosphate reductase subunit M2 OS=Homo sapiens OX=9606 GN=RRM2 PE=1 SV=1	0	1566.87	88.3	75.6	95.4	129.3	98.8	112.6	2	1.67	0.00131	23.8982	58
AAAPQAWAGPMEEPPQAQAPPR	1xTMT6plex [N-Term]	7.15852e-08	0	1	Q16643	DBN1	Drebrin OS=Homo sapiens OX=9606 GN=DBN1 PE=1 SV=4	0	2500.26	89.7	94	97.1	108.1	103.8	107.2	3	0.67	0.00056	27.1649	51
AAAQCYIDLIIK	1xCarbamidomethyl [C5]; 1xTMT6plex [K12]; 1xTMT6plex [N-Term]	5.51517e-07	0	4	P53618	COPB1	Coatomer subunit beta OS=Homo sapiens OX=9606 GN=COPB1 PE=1 SV=3	0	1837.07	94	98.5	105.6	100.1	103.4	98.4	2	4.3	0.00395	44.3696	62
AAAQLLQSQAQQSGAQQTK	1xTMT6plex [K19]; 1xTMT6plex [N-Term]	4.49399e-09	0	2	Q9NVA2	SEPTIN11	Septin-11 OS=Homo sapiens OX=9606 GN=SEPTIN11 PE=1 SV=3	0	2415.34	96.5	106.7	106.3	94.4	99.7	96.4	2	1.17	0.00141	22.2803	98
AAAQQLGEVVK	1xTMT6plex [K11]; 1xTMT6plex [N-Term]	5.67806e-06	0	1	O14981	BTAF1	TATA-binding protein-associated factor 172 OS=Homo sapiens OX=9606 GN=BTAF1 PE=1 SV=2	0	1571.95	100.8	99.1	104.8	104.8	97.4	93.1	2	3.63	0.00285	21.9122	60
AAAQYYLGNFR	1xTMT6plex [N-Term]	7.21717e-05	2.77511e-05	1	O95801	TTC4	Tetratricopeptide repeat protein 4 OS=Homo sapiens OX=9606 GN=TTC4 PE=1 SV=3	0	1502.8	100.1	104.2	105.8	95.1	96.4	98.4	2	3.74	0.00281	29.2352	27
AAASMGDTLSEQQLGDSDIPVIVYR	1xTMT6plex [N-Term]	3.78509e-09	0	1	Q96P48	ARAP1	Arf-GAP with Rho-GAP domain, ANK repeat and PH domain-containing protein 1 OS=Homo sapiens OX=9606 GN=ARAP1 PE=1 SV=3	0	2865.45	100.1	101.4	116.5	92.7	95.7	93.5	3	1.94	0.00186	41.737	68
AAASQGAEK	1xTMT6plex [K9]; 1xTMT6plex [N-Term]	0.000177505	2.77511e-05	1	Q9UKJ3	GPATCH8	G patch domain-containing protein 8 OS=Homo sapiens OX=9606 GN=GPATCH8 PE=1 SV=2	0	1290.74	100	104	103.4	97	97.1	98.5	2	1.1	0.00071	8.3147	30
AAASTDYYK	1xTMT6plex [K9]; 1xTMT6plex [N-Term]	0.0001194	2.77511e-05	1	P08559	PDHA1	Pyruvate dehydrogenase E1 component subunit alpha, somatic form, mitochondrial OS=Homo sapiens OX=9606 GN=PDHA1 PE=1 SV=3	0	1447.78	98.8	103.2	92.4	100.4	110.4	94.8	2	1.3	0.00094	15.4506	49
AAASVTPPGSLELLQPGFSK	1xAcetyl [N-Term]; 1xTMT6plex [K20]; 1xTMT6plex [N-Term]	0.00118073	0.000132543	1	Q12933	TRAF2	TNF receptor-associated factor 2 OS=Homo sapiens OX=9606 GN=TRAF2 PE=1 SV=2	0	2470.4							3	-92761.2	-76.3856	48.1849	21
AAATAEEPDPK	1xTMT6plex [K11]; 1xTMT6plex [N-Term]	0.000152497	2.77511e-05	2	Q99733	NAP1L4	Nucleosome assembly protein 1-like 4 OS=Homo sapiens OX=9606 GN=NAP1L4 PE=1 SV=1	0	1557.85	107.3	108.9	99	94	98.8	91.9	2	1.73	0.00135	12.8659	39
AAATGAVAASAASGQAEGK	1xAcetyl [N-Term]; 1xTMT6plex [K19]; 1xTMT6plex [N-Term]	3.1086e-05	0	1	Q9NWH9	SLTM	SAFB-like transcription modulator OS=Homo sapiens OX=9606 GN=SLTM PE=1 SV=2	0	2089.13	97.9	100.4	100.4	100.8	97.4	103.2	2	-109690	-114.578	23.3117	100
AAATGLPEGPAVPVPSR	1xTMT6plex [N-Term]	0.000432281	3.92285e-05	1	Q8N1S5	SLC39A11	Zinc transporter ZIP11 OS=Homo sapiens OX=9606 GN=SLC39A11 PE=2 SV=3	0	1819.03							3	6.47	0.00392	24.8777	28
AAATGPSFWLGNETLK	1xAcetyl [N-Term]; 1xTMT6plex [K16]; 1xTMT6plex [N-Term]	5.2907e-05	1.80381e-05	2	P12955	PEPD	Xaa-Pro dipeptidase OS=Homo sapiens OX=9606 GN=PEPD PE=1 SV=3	0	2163.19	108.6	115.8	120.3	87.4	88.4	79.5	2	-105935	-114.578	48.6191	100
AAATMATPLPGR	1xTMT6plex [N-Term]	8.60871e-05	2.77511e-05	1	Q03252	LMNB2	Lamin-B2 OS=Homo sapiens OX=9606 GN=LMNB2 PE=1 SV=4	0	1385.78	99.8	103.3	102.3	99.1	94	101.5	2	-1.74	-0.0012	17.8257	37
AAATPAK	1xTMT6plex [K7]; 1xTMT6plex [N-Term]	0.205716	0.00677949	1	P19338	NCL	Nucleolin OS=Homo sapiens OX=9606 GN=NCL PE=1 SV=3	0	1087.69	114.9	109.3	107.2	87.6	91	90	2	2.34	0.00127	9.2166	15
AAATPESQEPQAK	1xTMT6plex [K13]; 1xTMT6plex [N-Term]	7.45523e-06	0	2	P49006	MARCKSL1	MARCKS-related protein OS=Homo sapiens OX=9606 GN=MARCKSL1 PE=1 SV=2	0	1785.97	93.3	96.9	98.9	101.7	104.7	104.6	2	2.37	0.00212	11.6686	53
AAATQPDAK	1xTMT6plex [K9]; 1xTMT6plex [N-Term]	9.37361e-05	2.77511e-05	1	Q7KZF4	SND1	Staphylococcal nuclease domain-containing protein 1 OS=Homo sapiens OX=9606 GN=SND1 PE=1 SV=1	0	1330.77	93.6	105.3	96.9	97.7	106.8	99.7	2	2.41	0.0016	9.2529	50
AAATSAK	1xTMT6plex [K7]; 1xTMT6plex [N-Term]	0.00625243	0.000455509	1	P19338	NCL	Nucleolin OS=Homo sapiens OX=9606 GN=NCL PE=1 SV=3	0	1077.67	109	103.9	107.4	90.3	94.6	94.9	2	1.78	0.00096	8.3043	39
AAATTSQPVLTSQQIETIFFK	1xTMT6plex [K21]; 1xTMT6plex [N-Term]	6.93276e-07	0	1	P11274	BCR	Breakpoint cluster region protein OS=Homo sapiens OX=9606 GN=BCR PE=1 SV=2	0	2739.53							3	5.97	0.00545	48.816	42
AAAVAAAGAGEPQSPDELLPK	1xAcetyl [N-Term]; 1xTMT6plex [K21]; 1xTMT6plex [N-Term]	7.65125e-05	2.77511e-05	5	Q9NS69	TOMM22	Mitochondrial import receptor subunit TOM22 homolog OS=Homo sapiens OX=9606 GN=TOMM22 PE=1 SV=3	0	2463.35	85	102.2	135.3	86.8	96	94.7	3	-93026.8	-76.3859	40.3599	70
AAAVGTANK	1xTMT6plex [K9]; 1xTMT6plex [N-Term]	0.00147206	0.000153798	1	P18206	VCL	Vinculin OS=Homo sapiens OX=9606 GN=VCL PE=1 SV=4	0	1260.77	101.8	95.4	98.8	107.5	101.4	95.1	2	2.05	0.00129	10.2581	10
AAAVLPVLDLAQR	1xTMT6plex [N-Term]	0.000680387	7.57932e-05	2	P19404	NDUFV2	NADH dehydrogenase [ubiquinone] flavoprotein 2, mitochondrial OS=Homo sapiens OX=9606 GN=NDUFV2 PE=1 SV=2	0	1565.96	104.4	104.5	95.5	94.6	99.6	101.5	3	3.41	0.00178	39.5706	31
AAAVLSGPSAGSAAGVPGGTGGLSAVSSGPR	1xAcetyl [N-Term]; 1xTMT6plex [N-Term]	5.30831e-06	0	1	Q8IZL8	PELP1	Proline-, glutamic acid- and leucine-rich protein 1 OS=Homo sapiens OX=9606 GN=PELP1 PE=1 SV=2	0	2837.5							3	-80761.4	-76.3867	36.9258	34
AAAVQADDVEVLK	1xTMT6plex [K13]; 1xTMT6plex [N-Term]	8.1713e-08	0	1	Q8N201	INTS1	Integrator complex subunit 1 OS=Homo sapiens OX=9606 GN=INTS1 PE=1 SV=2	0	1787.03	102.2	106.4	104.5	92.9	97.3	96.6	2	6.32	0.00564	26.5977	71
AAAVSLENVLLDVK	1xTMT6plex [K14]; 1xTMT6plex [N-Term]	1.28004e-05	0	2	Q8IVF7; Q96PY5	FMNL3; FMNL2	Formin-like protein 3 OS=Homo sapiens OX=9606 GN=FMNL3 PE=1 SV=3;Formin-like protein 2 OS=Homo sapiens OX=9606 GN=FMNL2 PE=1 SV=3	0	1900.15	93.5	109.1	97.6	101.6	101	97.2	3	3.16	0.002	48.1437	53
AAAVSSGFDGAIQLVSLGGR	1xTMT6plex [N-Term]	4.06835e-08	0	2	O00468	AGRN	Agrin OS=Homo sapiens OX=9606 GN=AGRN PE=1 SV=6	0	2105.16	93.9	116.2	102.6	94	95	98.2	3	6.91	0.00485	44.1352	60
AAAVSSVVR	1xAcetyl [N-Term]; 1xTMT6plex [N-Term]	0.00373317	0.000283562	1	A6NDU8	C5orf51	UPF0600 protein C5orf51 OS=Homo sapiens OX=9606 GN=C5orf51 PE=1 SV=1	0	1130.67							2	-202677	-114.581	20.8652	61
AAAVTLK	1xTMT6plex [K7]; 1xTMT6plex [N-Term]	0.0133509	0.00109815	1	O00330	PDHX	Pyruvate dehydrogenase protein X component, mitochondrial OS=Homo sapiens OX=9606 GN=PDHX PE=1 SV=3	0	1131.75							2	2.81	0.00159	16.4832	17
AAAYSAQVQPVDGATR	1xTMT6plex [N-Term]	1.42152e-06	0	1	Q9H7E9	C8orf33	UPF0488 protein C8orf33 OS=Homo sapiens OX=9606 GN=C8orf33 PE=1 SV=1	0	1833.97	86.6	109.8	122.1	88.2	98.7	94.5	2	2.05	0.00188	16.5621	69
AACCLAGAR	2xCarbamidomethyl [C3; C4]; 1xTMT6plex [N-Term]	0.000586932	5.20452e-05	1	O95336	PGLS	6-phosphogluconolactonase OS=Homo sapiens OX=9606 GN=PGLS PE=1 SV=2	0	1178.6	91.5	91.4	95.9	105.3	115.8	100.1	2	1.8	0.00106	10.5737	21
AACEQQAVALTLQEDR	1xCarbamidomethyl [C3]; 1xTMT6plex [N-Term]	2.48356e-08	0	2	Q9BUH6	PAXX	Protein PAXX OS=Homo sapiens OX=9606 GN=PAXX PE=1 SV=2	0	2032.03	107.6	109.5	99.7	94.2	95.8	93.2	2	3.15	0.0032	26.4547	93
AACFAIQK	1xCarbamidomethyl [C3]; 1xTMT6plex [K8]; 1xTMT6plex [N-Term]	0.0015454	0.000164178	1	O15269	SPTLC1	Serine palmitoyltransferase 1 OS=Homo sapiens OX=9606 GN=SPTLC1 PE=1 SV=1	0	1366.79	97.1	98.3	101.9	102.4	97.9	102.4	2	0.77	0.00053	22.6266	20
AACGAVLLTELLER	1xCarbamidomethyl [C3]; 1xTMT6plex [N-Term]	1.34331e-07	0	1	Q8N697	SLC15A4	Solute carrier family 15 member 4 OS=Homo sapiens OX=9606 GN=SLC15A4 PE=1 SV=1	0	1744.98	95	96.8	95.3	106.9	107.9	98.1	2	3.97	0.00346	50.1962	52
AACLCFR	2xCarbamidomethyl [C3; C5]; 1xTMT6plex [N-Term]	0.0266684	0.0019101	1	O95989; Q9NZJ9; A0A024RBG1	NUDT3; NUDT4; NUDT4B	Diphosphoinositol polyphosphate phosphohydrolase 1 OS=Homo sapiens OX=9606 GN=NUDT3 PE=1 SV=1;Diphosphoinositol polyphosphate phosphohydrolase 2 OS=Homo sapiens OX=9606 GN=NUDT4 PE=1 SV=2;Diphosphoinositol polyphosphate phosphohydrolase NUDT4B OS=Homo sapiens OX=9606 GN=NUDT4B PE=3 SV=1	0	1126.57	106.9	104.1	104.3	94.3	95.9	94.4	2	2.15	0.00121	18.8377	10
AACLLDGVPVALK	1xCarbamidomethyl [C3]; 1xTMT6plex [K13]; 1xTMT6plex [N-Term]	0.000118997	2.77511e-05	2	Q8TDX7	NEK7	Serine/threonine-protein kinase Nek7 OS=Homo sapiens OX=9606 GN=NEK7 PE=1 SV=1	0	1785.07	86.8	99.8	108.3	99.6	97.4	108.1	3	6.35	0.00378	39.1671	34
AACILTSQTLMR	1xCarbamidomethyl [C3]; 1xTMT6plex [N-Term]	5.27431e-05	1.80381e-05	1	Q9P265	DIP2B	Disco-interacting protein 2 homolog B OS=Homo sapiens OX=9606 GN=DIP2B PE=1 SV=3	0	1593.87	101.2	101.7	98.3	99.4	95.8	103.7	2	3.68	0.00293	28.6757	10
AACLPLPGYR	1xCarbamidomethyl [C3]; 1xTMT6plex [N-Term]	0.00051138	3.92285e-05	2	P13796	LCP1	Plastin-2 OS=Homo sapiens OX=9606 GN=LCP1 PE=1 SV=6	0	1346.75	93.2	92.8	90.6	111.7	109	102.6	2	2.78	0.00187	25.86	28
AACQCVEPIK	2xCarbamidomethyl [C3; C5]; 1xTMT6plex [K10]; 1xTMT6plex [N-Term]	3.16042e-05	0	1	Q99575	POP1	Ribonucleases P/MRP protein subunit POP1 OS=Homo sapiens OX=9606 GN=POP1 PE=1 SV=2	0	1633.88	102.7	91.2	101.1	105	99.9	100.2	2	4.14	0.00339	16.2833	36
AACQEAQVFGNQLIPPNAQVK	1xCarbamidomethyl [C3]; 1xTMT6plex [K21]; 1xTMT6plex [N-Term]	3.35386e-08	0	2	Q53H12	AGK	Acylglycerol kinase, mitochondrial OS=Homo sapiens OX=9606 GN=AGK PE=1 SV=2	0	2741.48	101.8	105.8	98.3	102.1	94.6	97.4	3	6.27	0.00573	35.2026	40
AACQLVK	1xCarbamidomethyl [C3]; 1xTMT6plex [K7]; 1xTMT6plex [N-Term]	0.0187704	0.00161716	1	Q9Y2I8	WDR37	WD repeat-containing protein 37 OS=Homo sapiens OX=9606 GN=WDR37 PE=1 SV=2	0	1247.75	103.9	98.4	96.1	104.3	96.6	100.6	2	1.34	0.00084	15.4335	11
AACSAAAMEEDSEASSSR	1xCarbamidomethyl [C3]; 1xTMT6plex [N-Term]	7.60782e-07	0	1	Q05086	UBE3A	Ubiquitin-protein ligase E3A OS=Homo sapiens OX=9606 GN=UBE3A PE=1 SV=4	0	2058.89	90.3	102.2	117.2	87.2	96.2	106.9	3	2.77	0.0019	15.2335	46
AACVSCPAQGVSSVDVA	2xCarbamidomethyl [C3; C6]; 1xTMT6plex [N-Term]	0.000479732	3.92285e-05	1	Q8NCG7	DAGLB	Sn1-specific diacylglycerol lipase beta OS=Homo sapiens OX=9606 GN=DAGLB PE=1 SV=2	0	1906.92	96.9	99.2	95.5	102	98.6	107.8	2	3.37	0.00321	25.7738	49
AADAEAEVASLNR	1xTMT6plex [N-Term]	7.4194e-05	2.77511e-05	2	P06753	TPM3	Tropomyosin alpha-3 chain OS=Homo sapiens OX=9606 GN=TPM3 PE=1 SV=2	0	1545.81	100.5	97.5	108	90.1	98.3	105.6	3	3.14	0.00162	18.7638	39
AADALEEQQR	1xTMT6plex [N-Term]	4.94051e-05	1.80381e-05	1	Q14980	NUMA1	Nuclear mitotic apparatus protein 1 OS=Homo sapiens OX=9606 GN=NUMA1 PE=1 SV=2	0	1359.71	97.9	103.4	96.5	99	100.8	102.3	2	-2.14	-0.00146	12.1037	31
AADALGK	1xTMT6plex [K7]; 1xTMT6plex [N-Term]	0.00664172	0.000505076	2	Q92616	GCN1	eIF-2-alpha kinase activator GCN1 OS=Homo sapiens OX=9606 GN=GCN1 PE=1 SV=6	0	1103.68	102.7	101.5	99.6	102	98.8	95.4	2	2.16	0.00119	14.7294	34
AADAVEDLR	1xTMT6plex [N-Term]	0.000192361	2.77511e-05	2	Q9UNF0	PACSIN2	Protein kinase C and casein kinase substrate in neurons protein 2 OS=Homo sapiens OX=9606 GN=PACSIN2 PE=1 SV=2	0	1188.64	111.7	103.8	111.2	90	89.4	93.9	2	2.43	0.00144	17.6336	39
AADCEVEQWDSDEPIPAK	1xCarbamidomethyl [C4]; 1xTMT6plex [K18]; 1xTMT6plex [N-Term]	2.99261e-07	0	3	Q9UBQ7	GRHPR	Glyoxylate reductase/hydroxypyruvate reductase OS=Homo sapiens OX=9606 GN=GRHPR PE=1 SV=1	0	2518.22	98.3	101.5	94.9	108.2	102.4	94.7	2	4.03	0.00508	31.4193	89
AADEIEKEK	2xTMT6plex [K7; K9]; 1xTMT6plex [N-Term]	0.00249833	0.000201691	1	Q96BN8	OTULIN	Ubiquitin thioesterase otulin OS=Homo sapiens OX=9606 GN=OTULIN PE=1 SV=3	1	1720.01							2	1.91	0.00164	14.8631	8
AADETLCQTK	1xCarbamidomethyl [C7]; 1xTMT6plex [K10]; 1xTMT6plex [N-Term]	9.64056e-06	0	1	P49916	LIG3	DNA ligase 3 OS=Homo sapiens OX=9606 GN=LIG3 PE=1 SV=2	0	1594.85							2	-0.05	-4e-05	14.508	50
AADEVAEGK	1xTMT6plex [K9]; 1xTMT6plex [N-Term]	5.93127e-05	1.80381e-05	2	P07954	FH	Fumarate hydratase, mitochondrial OS=Homo sapiens OX=9606 GN=FH PE=1 SV=3	0	1347.75	101.2	105.6	97.8	94	100.9	100.3	2	2.52	0.0017	13.4859	53
AADEVLAEAK	1xTMT6plex [K10]; 1xTMT6plex [N-Term]	1.57665e-05	0	2	Q6P1J9	CDC73	Parafibromin OS=Homo sapiens OX=9606 GN=CDC73 PE=1 SV=1	0	1474.85	105.8	106.9	113.3	90.3	92.5	91.2	2	-0.25	-0.00018	23.4783	53
AADFIDQALAQK	1xTMT6plex [K12]; 1xTMT6plex [N-Term]	1.40136e-06	0	2	P51452	DUSP3	Dual specificity protein phosphatase 3 OS=Homo sapiens OX=9606 GN=DUSP3 PE=1 SV=1	0	1748.99	90.4	98.9	94	105.2	106.2	105.3	2	4.59	0.00401	40.5876	65
AADFQLHTHVNDGTEFGGSIYQK	1xTMT6plex [K23]; 1xTMT6plex [N-Term]	9.59805e-08	0	2	Q9Y277	VDAC3	Voltage-dependent anion-selective channel protein 3 OS=Homo sapiens OX=9606 GN=VDAC3 PE=1 SV=1	0	2993.52	92.2	99.1	90.4	104.8	108.8	104.5	3	-1.56	-0.00156	27.7444	89
AADGDWQDFYEFQEPAR	1xAcetyl [N-Term]; 1xTMT6plex [N-Term]	0.00231391	0.000201691	1	Q9UHY8	FEZ2	Fasciculation and elongation protein zeta-2 OS=Homo sapiens OX=9606 GN=FEZ2 PE=1 SV=2	0	2316.04							2	-98938.6	-114.573	48.1025	50
AADGSAVSTVTK	1xTMT6plex [K12]; 1xTMT6plex [N-Term]	1.07976e-06	0	1	P53814	SMTN	Smoothelin OS=Homo sapiens OX=9606 GN=SMTN PE=1 SV=7	0	1564.89	98.3	82	106.9	104.8	103	105.1	2	2.91	0.00228	14.9792	75
AADIDQEVK	1xTMT6plex [K9]; 1xTMT6plex [N-Term]	9.92909e-05	2.77511e-05	2	Q86VP6	CAND1	Cullin-associated NEDD8-dissociated protein 1 OS=Homo sapiens OX=9606 GN=CAND1 PE=1 SV=2	0	1446.82	101.7	107.4	98.9	92.8	99.6	99.5	2	7.63	0.00552	17.7318	41
AADIEQQAVFAVFDENK	1xTMT6plex [K17]; 1xTMT6plex [N-Term]	1.52828e-05	0	2	P12259	F5	Coagulation factor V OS=Homo sapiens OX=9606 GN=F5 PE=1 SV=4	0	2353.24	100.8	100.6	98.1	87.5	112.9	100.1	3	-1.09	-0.00086	46.9698	51
AADLFESEGAK	1xTMT6plex [K11]; 1xTMT6plex [N-Term]	2.93808e-05	0	1	Q9H0R6	QRSL1	Glutamyl-tRNA(Gln) amidotransferase subunit A, mitochondrial OS=Homo sapiens OX=9606 GN=QRSL1 PE=1 SV=2	0	1595.87	110.6	104.1	109.8	88.4	92.5	94.5	2	-1.31	-0.00105	26.3777	14
AADIIDGLR	1xTMT6plex [N-Term]	0.0039484	0.000294148	1	Q96ST3	SIN3A	Paired amphipathic helix protein Sin3a OS=Homo sapiens OX=9606 GN=SIN3A PE=1 SV=2	0	1172.68							2	3.74	0.00219	28.4358	30
AADLLYAMCDR	1xCarbamidomethyl [C9]; 1xTMT6plex [N-Term]	2.94787e-05	0	2	O95782	AP2A1	AP-2 complex subunit alpha-1 OS=Homo sapiens OX=9606 GN=AP2A1 PE=1 SV=3	0	1527.75	93	96.8	96.4	105.5	107.4	101	2	1.43	0.00109	35.7713	43
AADLNGDLTATR	1xTMT6plex [N-Term]	2.50668e-06	0	1	Q15293	RCN1	Reticulocalbin-1 OS=Homo sapiens OX=9606 GN=RCN1 PE=1 SV=1	0	1446.77	90.3	91.5	93.3	114.9	106.9	103.1	2	1.07	0.00077	19.1342	49
AADLQLEMTQKPHK	2xTMT6plex [K11; K14]; 1xTMT6plex [N-Term]	7.19506e-05	2.77511e-05	1	O15382	BCAT2	Branched-chain-amino-acid aminotransferase, mitochondrial OS=Homo sapiens OX=9606 GN=BCAT2 PE=1 SV=2	0	2297.33	93.9	96.5	88.6	110.3	108	102.6	3	3.49	0.00267	21.3345	9
AADISLDNLVEGK	1xTMT6plex [K13]; 1xTMT6plex [N-Term]	4.83188e-07	0	2	Q12888	TP53BP1	TP53-binding protein 1 OS=Homo sapiens OX=9606 GN=TP53BP1 PE=1 SV=2	0	1803.03	99.8	100.2	96.2	110	94.7	99.2	2	3.26	0.00294	37.8232	35
AADMGNPVGQSGLGMAYLYGR	1xTMT6plex [N-Term]	6.11623e-08	0	1	Q9UBV2	SEL1L	Protein sel-1 homolog 1 OS=Homo sapiens OX=9606 GN=SEL1L PE=1 SV=3	0	2357.16	87.4	98.3	95.3	112.8	105.4	100.7	2	1.58	0.00186	38.832	79
AADQFDIYSSQQSK	1xTMT6plex [K14]; 1xTMT6plex [N-Term]	6.5944e-07	0	1	Q7Z6I8	C5orf24	UPF0461 protein C5orf24 OS=Homo sapiens OX=9606 GN=C5orf24 PE=1 SV=1	0	2046.05	102.9	94.4	92	104.7	109.4	96.5	2	0.76	0.00078	25.8165	78
AADRLEQELLR	1xTMT6plex [N-Term]	0.00170455	0.000174676	1	Q6PK04	CCDC137	Coiled-coil domain-containing protein 137 OS=Homo sapiens OX=9606 GN=CCDC137 PE=1 SV=1	1	1542.88	110.9	101.3	102.4	96.7	94.1	94.6	3	4.89	0.00252	24.739	11
AADSDDGAVSAPAASDGGVSK	1xTMT6plex [K21]; 1xTMT6plex [N-Term]	9.26003e-07	0	1	Q96GM8	TOE1	Target of EGR1 protein 1 OS=Homo sapiens OX=9606 GN=TOE1 PE=1 SV=1	0	2306.15	101.8	102.6	99.4	100.6	99.4	96.3	3	0.26	0.0002	17.4838	58
AADSQNSGEGNTGAAESSFSQEVSR	1xTMT6plex [N-Term]	1.2753e-10	0	1	P12270	TPR	Nucleoprotein TPR OS=Homo sapiens OX=9606 GN=TPR PE=1 SV=3	0	2715.23	98.1	100.4	117.7	97.4	96.9	89.4	3	1.58	0.00143	18.8858	141
AADTIEALQK	1xTMT6plex [K10]; 1xTMT6plex [N-Term]	0.00257649	0.000201691	1	P98196	ATP11A	Probable phospholipid-transporting ATPase IH OS=Homo sapiens OX=9606 GN=ATP11A PE=1 SV=3	0	1517.89	98	104.7	98.4	98.1	99.2	101.6	3	5.75	0.00291	24.6514	20
AADTQVSETLK	1xTMT6plex [K11]; 1xTMT6plex [N-Term]	3.45376e-06	0	1	Q92616	GCN1	eIF-2-alpha kinase activator GCN1 OS=Homo sapiens OX=9606 GN=GCN1 PE=1 SV=6	0	1620.92	104.6	100.2	101.2	97.8	99.1	97.1	2	1.78	0.00144	18.0329	58
AADTQVSETLKR	1xTMT6plex [K11]; 1xTMT6plex [N-Term]	0.00165498	0.000174676	1	Q92616	GCN1	eIF-2-alpha kinase activator GCN1 OS=Homo sapiens OX=9606 GN=GCN1 PE=1 SV=6	1	1777.02	95	97	99.3	99.6	98.7	110.5	3	1.28	0.00076	14.1884	5
AADVVGDVYVLVEHPFEYTGK	1xAcetyl [N-Term]; 1xTMT6plex [K21]; 1xTMT6plex [N-Term]	0.000168409	2.77511e-05	1	Q6ZUM4	ARHGAP27	Rho GTPase-activating protein 27 OS=Homo sapiens OX=9606 GN=ARHGAP27 PE=1 SV=3	0	2808.49	94.3	94.8	121.4	84	104.3	101.2	3	-81589.9	-76.3814	54.0367	62
AAEAAAAPAESAAPAAGEEPSKEEGEPK	2xTMT6plex [K22; K28]; 1xTMT6plex [N-Term]	1.19656e-09	0	2	P80723	BASP1	Brain acid soluble protein 1 OS=Homo sapiens OX=9606 GN=BASP1 PE=1 SV=2	1	3323.72	83.5	94.5	95.9	108	106.7	111.4	3	2.18	0.00241	17.8779	60
AAEAAINILK	1xTMT6plex [K10]; 1xTMT6plex [N-Term]	0.00232573	0.000201691	1	O75569	PRKRA	Interferon-inducible double-stranded RNA-dependent protein kinase activator A OS=Homo sapiens OX=9606 GN=PRKRA PE=1 SV=1	0	1471.92							3	1.95	0.00096	31.5474	21
AAEADSK	1xTMT6plex [K7]; 1xTMT6plex [N-Term]	0.0177953	0.00152836	1	O94776	MTA2	Metastasis-associated protein MTA2 OS=Homo sapiens OX=9606 GN=MTA2 PE=1 SV=1	0	1149.65	102.9	102	101.7	96.9	96.1	100.4	2	3.9	0.00224	8.7318	10
AAEAEVELSAR	1xTMT6plex [N-Term]	9.70852e-06	0	1	Q8IZ83	ALDH16A1	Aldehyde dehydrogenase family 16 member A1 OS=Homo sapiens OX=9606 GN=ALDH16A1 PE=1 SV=2	0	1374.74	101.9	106.6	96.3	101.3	97.3	96.6	2	4.25	0.00292	17.5848	32
AAEAGGAEEQYGFLTTPTK	1xTMT6plex [K19]; 1xTMT6plex [N-Term]	3.01954e-10	0	3	P46821	MAP1B	Microtubule-associated protein 1B OS=Homo sapiens OX=9606 GN=MAP1B PE=1 SV=2	0	2399.25	84.1	83.1	79.9	118.8	121.3	112.7	2	1.97	0.00236	30.6997	92
AAEAVAAAVGTGATTAAVMAAAGIAAIGPAK	1xTMT6plex [K31]; 1xTMT6plex [N-Term]	5.35129e-10	0	3	P46821	MAP1B	Microtubule-associated protein 1B OS=Homo sapiens OX=9606 GN=MAP1B PE=1 SV=2	0	3082.73	78.8	85.6	84.6	118.9	117.1	115	4	4.14	0.00319	55.1876	109
AAECAGK	1xCarbamidomethyl [C4]; 1xTMT6plex [K7]; 1xTMT6plex [N-Term]	0.0132414	0.0010788	1	P53992	SEC24C	Protein transport protein Sec24C OS=Homo sapiens OX=9606 GN=SEC24C PE=1 SV=3	0	1164.64	95.4	96.1	95.7	103.7	105.4	103.6	2	1.35	0.00079	8.7122	18
AAECNIVVTQPR	1xCarbamidomethyl [C4]; 1xTMT6plex [N-Term]	0.00014245	2.77511e-05	1	Q08211	DHX9	ATP-dependent RNA helicase A OS=Homo sapiens OX=9606 GN=DHX9 PE=1 SV=4	0	1586.85	106.8	111	101.8	92.1	103.2	85.1	3	2.55	0.00135	15.9015	26
AAEDDEDDDVDTKK	2xTMT6plex [K13; K14]; 1xTMT6plex [N-Term]	1.09952e-07	0	4	P06454	PTMA	Prothymosin alpha OS=Homo sapiens OX=9606 GN=PTMA PE=1 SV=2	1	2253.13	114.7	116.8	108.2	87.9	86.6	85.9	2	1.67	0.00189	14.0579	73
AAEDELNIEAK	1xTMT6plex [K11]; 1xTMT6plex [N-Term]	5.05121e-06	0	1	Q9UQ90	SPG7	Paraplegin OS=Homo sapiens OX=9606 GN=SPG7 PE=1 SV=2	0	1660.92	101.4	97.7	88	108.6	100.1	104.2	2	-0.2	-0.00017	23.6648	44
AAEDLFVNIR	1xTMT6plex [N-Term]	7.48815e-05	2.77511e-05	1	Q9Y2A7	NCKAP1	Nck-associated protein 1 OS=Homo sapiens OX=9606 GN=NCKAP1 PE=1 SV=1	0	1376.77	101.6	109.6	96.2	97.2	96.4	99	2	3.42	0.00236	32.9163	32
AAEDYGVIK	1xTMT6plex [K9]; 1xTMT6plex [N-Term]	0.000205561	2.77511e-05	1	Q01995	TAGLN	Transgelin OS=Homo sapiens OX=9606 GN=TAGLN PE=1 SV=4	0	1423.82	91.1	89.7	92	108.8	110.4	108	2	5.86	0.00417	21.1238	36
AAEEAKK	2xTMT6plex [K6; K7]; 1xTMT6plex [N-Term]	0.0420108	0.00248415	1	Q9Y617	PSAT1	Phosphoserine aminotransferase OS=Homo sapiens OX=9606 GN=PSAT1 PE=1 SV=2	1	1433.89	123.9	92.3	104.8	91.5	95.6	91.8	2	1.38	0.00099	9.0168	14
AAEEEDEADPKR	1xTMT6plex [K11]; 1xTMT6plex [N-Term]	1.88607e-05	0	2	P20962	PTMS	Parathymosin OS=Homo sapiens OX=9606 GN=PTMS PE=1 SV=2	1	1817.93	91.6	102.3	88.3	99.1	124.3	94.5	2	4.97	0.00452	9.9881	36
AAEEFVNVYYTTMDK	1xTMT6plex [K15]; 1xTMT6plex [N-Term]	2.28329e-05	0	1	Q9UKK6	NXT1	NTF2-related export protein 1 OS=Homo sapiens OX=9606 GN=NXT1 PE=1 SV=1	0	2239.14	103.7	105.7	92.9	105.3	95.4	97	3	4.04	0.00302	44.461	39
AAEEGQK	1xTMT6plex [K7]; 1xTMT6plex [N-Term]	0.0173342	0.00149407	1	Q9P2B4	CTTNBP2NL	CTTNBP2 N-terminal-like protein OS=Homo sapiens OX=9606 GN=CTTNBP2NL PE=1 SV=2	0	1190.68							2	1.97	0.00117	8.4908	8
AAEEIGIK	1xTMT6plex [K8]; 1xTMT6plex [N-Term]	0.000739568	7.57932e-05	1	P11586	MTHFD1	C-1-tetrahydrofolate synthase, cytoplasmic OS=Homo sapiens OX=9606 GN=MTHFD1 PE=1 SV=3	0	1288.79	95.8	99.3	92.2	103.5	107	102.1	2	2.73	0.00176	19.7898	35
AAEELSK	1xTMT6plex [K7]; 1xTMT6plex [N-Term]	0.00547437	0.000395322	1	Q8WUM4	PDCD6IP	Programmed cell death 6-interacting protein OS=Homo sapiens OX=9606 GN=PDCD6IP PE=1 SV=1	0	1205.71	98.6	96.3	97.3	104.3	107.3	96.2	2	1.61	0.00097	14.0415	34
AAEELTWER	1xTMT6plex [N-Term]	0.000842395	8.78677e-05	1	O60337	MARCH6	E3 ubiquitin-protein ligase MARCH6 OS=Homo sapiens OX=9606 GN=MARCH6 PE=1 SV=2	0	1333.69	91.8	92.8	97.1	107	103.8	107.4	2	1.96	0.00131	22.0768	12
AAEEPSK	1xTMT6plex [K7]; 1xTMT6plex [N-Term]	0.0226548	0.00179395	1	P29966	MARCKS	Myristoylated alanine-rich C-kinase substrate OS=Homo sapiens OX=9606 GN=MARCKS PE=1 SV=4	0	1189.68	97.3	99.6	107	100.4	93.9	101.8	2	1.88	0.00112	9.713	16
AAEEPSKVEEK	2xTMT6plex [K7; K11]; 1xTMT6plex [N-Term]	2.81347e-05	0	2	P29966	MARCKS	Myristoylated alanine-rich C-kinase substrate OS=Homo sapiens OX=9606 GN=MARCKS PE=1 SV=4	1	1904.09	93.5	94.4	85.7	113.4	109.9	103	2	0.53	0.00051	12.0663	34
AAEEPVSEVTVGVSVLAER	1xTMT6plex [N-Term]	5.8607e-07	0	1	Q05655	PRKCD	Protein kinase C delta type OS=Homo sapiens OX=9606 GN=PRKCD PE=1 SV=2	0	2171.18	106.5	101.1	95.5	102.7	92	102.2	3	0.9	0.00065	37.7276	37
AAEESASQIQSSAQR	1xTMT6plex [N-Term]	2.14483e-08	0	2	Q13751	LAMB3	Laminin subunit beta-3 OS=Homo sapiens OX=9606 GN=LAMB3 PE=1 SV=1	0	1791.9	84.8	83.6	80.1	120.4	116.7	114.4	2	4.19	0.00375	12.4114	58
AAEEVEAK	1xTMT6plex [K8]; 1xTMT6plex [N-Term]	0.000903411	9.98689e-05	1	Q9NX63	CHCHD3	MICOS complex subunit MIC19 OS=Homo sapiens OX=9606 GN=CHCHD3 PE=1 SV=1	0	1304.75	94.3	98.6	99.4	100.1	105.6	102	2	1.73	0.00113	12.8999	42
AAEFGEPTSEQTGTAAGK	1xTMT6plex [K18]; 1xTMT6plex [N-Term]	5.13307e-08	0	2	O95425	SVIL	Supervillin OS=Homo sapiens OX=9606 GN=SVIL PE=1 SV=2	0	2210.13	98.1	104.4	97.8	100.1	102.6	97	2	3.96	0.00438	19.5955	91
AAEFLQMLEAIK	1xTMT6plex [K12]; 1xTMT6plex [N-Term]	0.000379739	3.92285e-05	1	P52739	ZNF131	Zinc finger protein 131 OS=Homo sapiens OX=9606 GN=ZNF131 PE=1 SV=2	0	1822.05	111.6	99.3	117.6	99	78.6	93.9	3	5.21	0.00317	53.538	34
AAEGAEAQGFSGLFAAYTDHPPPFR	1xTMT6plex [N-Term]	4.02494e-08	0	1	Q9P253	VPS18	Vacuolar protein sorting-associated protein 18 homolog OS=Homo sapiens OX=9606 GN=VPS18 PE=1 SV=2	0	2836.39	93.5	97.3	95	104.2	104.3	105.8	3	0.58	0.00054	43.2019	47
AAEGGLSSPEFSELCIWLGSQIK	1xCarbamidomethyl [C15]; 1xTMT6plex [K23]; 1xTMT6plex [N-Term]	2.13513e-06	0	1	Q52LJ0	FAM98B	Protein FAM98B OS=Homo sapiens OX=9606 GN=FAM98B PE=1 SV=2	0	2937.54	95.5	90.6	98.7	110.6	102.2	102.5	3	5.25	0.00514	53.179	59
AAEGWSAPILTLAR	1xTMT6plex [N-Term]	4.47702e-06	0	2	Q96T51	RUFY1	RUN and FYVE domain-containing protein 1 OS=Homo sapiens OX=9606 GN=RUFY1 PE=1 SV=2	0	1684.96	102	100.8	103.9	100.4	95.3	97.7	2	2.78	0.00234	39.9153	46
AAELEMELNEHSLVIDTLK	1xTMT6plex [K19]; 1xTMT6plex [N-Term]	2.95306e-06	0	2	Q9UHV9	PFDN2	Prefoldin subunit 2 OS=Homo sapiens OX=9606 GN=PFDN2 PE=1 SV=1	0	2613.42	105.7	101.8	101.8	97.5	100.8	92.3	3	1.74	0.00151	43.2922	35
AAELEPDQLLAWQGLANLYEK	1xTMT6plex [K21]; 1xTMT6plex [N-Term]	2.9291e-07	0	1	Q6PGP7	TTC37	Tetratricopeptide repeat protein 37 OS=Homo sapiens OX=9606 GN=TTC37 PE=1 SV=1	0	2830.54	94.2	106.9	90.9	109.4	95.3	103.4	3	3.12	0.00294	52.7361	40
AAELIANSLATAGDGLIELR	1xTMT6plex [N-Term]	7.51161e-11	0	8	P35232	PHB	Prohibitin OS=Homo sapiens OX=9606 GN=PHB PE=1 SV=1	0	2227.25	102.3	100.9	98.5	98.4	98.8	101.1	2	7.25	0.00807	52.6657	105
AAEILAR	1xTMT6plex [N-Term]	0.00802858	0.000592381	2	P05023	ATP1A1	Sodium/potassium-transporting ATPase subunit alpha-1 OS=Homo sapiens OX=9606 GN=ATP1A1 PE=1 SV=1	0	972.604	103.5	112.2	103.6	86.2	98.4	96.1	2	1.99	0.00097	15.6612	32
AAELLMSCFR	1xCarbamidomethyl [C8]; 1xTMT6plex [N-Term]	0.00017288	2.77511e-05	1	Q5JVF3	PCID2	PCI domain-containing protein 2 OS=Homo sapiens OX=9606 GN=PCID2 PE=1 SV=2	0	1426.74							2	4.48	0.0032	38.342	7
AAEILYYFALR	1xTMT6plex [N-Term]	3.18137e-05	0	1	Q16706	MAN2A1	Alpha-mannosidase 2 OS=Homo sapiens OX=9606 GN=MAN2A1 PE=1 SV=2	0	1558.88	99.5	92.9	100.9	114.5	92.3	99.9	2	2.05	0.0016	51.6982	23
AAEISAMLK	1xTMT6plex [K9]; 1xTMT6plex [N-Term]	0.00396851	0.000304142	1	Q99575	POP1	Ribonucleases P/MRP protein subunit POP1 OS=Homo sapiens OX=9606 GN=POP1 PE=1 SV=2	0	1391.83	96.1	90.1	126.7	127	76	84.2	3	2.84	0.00132	30.9243	19
AAELWGEQAEAR	1xTMT6plex [N-Term]	8.05549e-07	0	1	Q08379	GOLGA2	Golgin subfamily A member 2 OS=Homo sapiens OX=9606 GN=GOLGA2 PE=1 SV=3	0	1559.8	99.9	93.2	98.9	107.5	93.4	107.1	2	1.03	0.00081	23.3163	61
AAEMDPVNSYQAWQLMARGMAMEHGFLSK	1xOxidation [M4]; 1xTMT6plex [K29]; 1xTMT6plex [N-Term]	0.18928	0.00635381	1	O15090	ZNF536	Zinc finger protein 536 OS=Homo sapiens OX=9606 GN=ZNF536 PE=1 SV=3	1	3743.82	101.4	91.6	103.9	97.8	96.3	109	4	9.33	0.00874	55.8154	3
AAEMEHLLER	1xTMT6plex [N-Term]	4.11353e-05	0	1	Q86TM6	SYVN1	E3 ubiquitin-protein ligase synoviolin OS=Homo sapiens OX=9606 GN=SYVN1 PE=1 SV=2	0	1427.75	101.2	102.2	102.7	98.5	98.3	97.3	3	4.03	0.00192	24.2196	42
AAEMLSQLDLFSR	1xTMT6plex [N-Term]	8.05549e-07	0	2	P78318	IGBP1	Immunoglobulin-binding protein 1 OS=Homo sapiens OX=9606 GN=IGBP1 PE=1 SV=1	0	1709.91	99.1	98.3	104.6	95.5	105.8	96.7	3	5.23	0.00298	47.8369	54
AAEMMASLLK	1xTMT6plex [K10]; 1xTMT6plex [N-Term]	2.19207e-05	0	2	P33176	KIF5B	Kinesin-1 heavy chain OS=Homo sapiens OX=9606 GN=KIF5B PE=1 SV=1	0	1522.87	109.1	115.2	108.4	85.4	91.3	90.5	2	7.04	0.00536	41.8628	50
AAENNVFHLVATVCSQEEPVQPLLR	1xCarbamidomethyl [C14]; 1xTMT6plex [N-Term]	8.46881e-08	0	1	Q96CW6	SLC7A6OS	Probable RNA polymerase II nuclear localization protein SLC7A6OS OS=Homo sapiens OX=9606 GN=SLC7A6OS PE=1 SV=2	0	3050.59	93.7	91.3	106.4	99.6	90.5	118.6	3	2.23	0.00227	43.2444	54
AAEPNKTEIQTLFK	1xAcetyl [N-Term]; 2xTMT6plex [K6; K14]; 1xTMT6plex [N-Term]	0.178132	0.00602689	1	Q8N6H7	ARFGAP2	ADP-ribosylation factor GTPase-activating protein 2 OS=Homo sapiens OX=9606 GN=ARFGAP2 PE=1 SV=1	1	2319.35	109.2	106.1	95.8	99	94.1	95.8	3	-98805.3	-76.3881	37.101	1
AAEPQEQEFGK	1xTMT6plex [K11]; 1xTMT6plex [N-Term]	6.51858e-06	0	2	Q9C0C2	TNKS1BP1	182 kDa tankyrase-1-binding protein OS=Homo sapiens OX=9606 GN=TNKS1BP1 PE=1 SV=4	0	1691.9	103.5	97.2	92	103.7	102	101.6	2	1.42	0.0012	17.6146	54
AAEPVEDNCINFVAMK	1xAcetyl [N-Term]; 1xCarbamidomethyl [C9]; 1xTMT6plex [K16]; 1xTMT6plex [N-Term]	8.18994e-05	2.77511e-05	2	Q14116	IL18	Interleukin-18 OS=Homo sapiens OX=9606 GN=IL18 PE=1 SV=1	0	2308.17	86.4	85.1	87.3	118.5	112.6	110.1	2	-99279.7	-114.577	42.2828	84
AAEQLPYLK	1xTMT6plex [K9]; 1xTMT6plex [N-Term]	0.0190261	0.00162509	1	Q16877	PFKFB4	6-phosphofructo-2-kinase/fructose-2,6-bisphosphatase 4 OS=Homo sapiens OX=9606 GN=PFKFB4 PE=2 SV=6	0	1490.9							2	2.59	0.00193	27.1392	21
AAEQYTPK	1xTMT6plex [K8]; 1xTMT6plex [N-Term]	0.00166313	0.000174676	3	P49327	FASN	Fatty acid synthase OS=Homo sapiens OX=9606 GN=FASN PE=1 SV=3	0	1365.78	102.7	111.3	105.8	90.1	99.3	90.7	2	0.3	0.0002	12.6967	32
AAESAEIEPR	1xTMT6plex [N-Term]	0.00619414	0.00044534	1	Q9NS91	RAD18	E3 ubiquitin-protein ligase RAD18 OS=Homo sapiens OX=9606 GN=RAD18 PE=1 SV=2	0	1301.69							2	-0.75	-0.00049	11.8215	4
AAESETPGK	1xTMT6plex [K9]; 1xTMT6plex [N-Term]	0.000550311	3.92285e-05	2	O76021	RSL1D1	Ribosomal L1 domain-containing protein 1 OS=Homo sapiens OX=9606 GN=RSL1D1 PE=1 SV=3	0	1347.75	111.5	102.8	109.7	97.3	88.4	90.4	2	0.8	0.00054	10.1403	29
AAESETPGKSPEK	2xTMT6plex [K9; K13]; 1xTMT6plex [N-Term]	1.41106e-05	0	2	O76021	RSL1D1	Ribosomal L1 domain-containing protein 1 OS=Homo sapiens OX=9606 GN=RSL1D1 PE=1 SV=3	1	2018.14	107.7	94.6	104.9	99.7	92.7	100.4	3	3.75	0.00252	10.6695	22
AAESLADPTEYENLFPGLK	1xTMT6plex [K19]; 1xTMT6plex [N-Term]	1.06469e-07	0	5	P35606	COPB2	Coatomer subunit beta' OS=Homo sapiens OX=9606 GN=COPB2 PE=1 SV=2	0	2523.34	99.6	102.3	96.5	102.7	102	96.9	2	3.73	0.00471	48.8013	70
AAESIDQK	1xTMT6plex [K8]; 1xTMT6plex [N-Term]	0.00248555	0.000201691	1	Q96RU3	FNBP1	Formin-binding protein 1 OS=Homo sapiens OX=9606 GN=FNBP1 PE=1 SV=2	0	1319.76	104.1	100.1	100.9	98.4	95.6	101	2	5.48	0.00361	12.4635	13
AAETQTLNFGPEWLR	1xAcetyl [N-Term]; 1xTMT6plex [N-Term]	0.000134175	2.77511e-05	1	Q6Y7W6	GIGYF2	GRB10-interacting GYF protein 2 OS=Homo sapiens OX=9606 GN=GIGYF2 PE=1 SV=1	0	2004.04							2	-114346	-114.577	48.739	56
AAETVLK	1xTMT6plex [K7]; 1xTMT6plex [N-Term]	0.00806411	0.000592381	1	P56192	MARS	Methionine--tRNA ligase, cytoplasmic OS=Homo sapiens OX=9606 GN=MARS PE=1 SV=2	0	1189.76							2	5.25	0.00312	16.177	23
AAEVEMQLR	1xTMT6plex [N-Term]	0.000332875	3.92285e-05	1	Q8N3D4	EHBP1L1	EH domain-binding protein 1-like protein 1 OS=Homo sapiens OX=9606 GN=EHBP1L1 PE=1 SV=2	0	1275.69	98.6	93.6	98	101.8	95.8	112	2	4.66	0.00297	20.102	22
AAEVLNK	1xTMT6plex [K7]; 1xTMT6plex [N-Term]	0.0580609	0.00297784	1	P52272	HNRNPM	Heterogeneous nuclear ribonucleoprotein M OS=Homo sapiens OX=9606 GN=HNRNPM PE=1 SV=3	0	1202.75	103.7	107.5	104.4	88.3	95.2	100.9	3	2.56	0.00103	17.3214	23
AAEVPNEELINLLLK	1xTMT6plex [K15]; 1xTMT6plex [N-Term]	0.00119766	0.000132543	1	Q709C8	VPS13C	Vacuolar protein sorting-associated protein 13C OS=Homo sapiens OX=9606 GN=VPS13C PE=1 SV=1	0	2124.27							3	-0.94	-0.00067	51.6631	31
AAEVWMDEYK	1xTMT6plex [K10]; 1xTMT6plex [N-Term]	0.00236159	0.000201691	1	Q10471	GALNT2	Polypeptide N-acetylgalactosaminyltransferase 2 OS=Homo sapiens OX=9606 GN=GALNT2 PE=1 SV=1	0	1699.88							3	5.85	0.00331	32.7517	12
AAEWQLDQPSWSGR	1xTMT6plex [N-Term]	6.11639e-06	0	2	Q9NVZ3	NECAP2	Adaptin ear-binding coat-associated protein 2 OS=Homo sapiens OX=9606 GN=NECAP2 PE=1 SV=1	0	1859.92	105.4	105.4	111.3	89.5	90.8	97.6	2	2.02	0.00188	31.4589	46
AAEWYNIDFSLQNQLR	1xTMT6plex [N-Term]	8.98609e-06	0	2	Q13045	FLII	Protein flightless-1 homolog OS=Homo sapiens OX=9606 GN=FLII PE=1 SV=2	0	2197.12	98.3	103.2	108.6	103.9	83.8	102.2	3	2.81	0.00206	45.4778	24
AAFAHFPELYDFALSNVAEVDTR	1xTMT6plex [N-Term]	5.3215e-07	0	1	O60306	AQR	RNA helicase aquarius OS=Homo sapiens OX=9606 GN=AQR PE=1 SV=4	0	2812.41	91.5	93.4	88.9	102.7	108.2	115.3	3	-0.68	-0.00064	51.2235	16
AAFALGGLGSGFASNR	1xTMT6plex [N-Term]	1.06405e-08	0	2	P27708	CAD	CAD protein OS=Homo sapiens OX=9606 GN=CAD PE=1 SV=3	0	1724.93	115.2	127.1	118.5	80.7	79.2	79.3	2	1.71	0.00147	36.4279	75
AAFDDAIAELDTLSEESYK	1xTMT6plex [K19]; 1xTMT6plex [N-Term]	2.99118e-08	0	5	P62258	YWHAE	14-3-3 protein epsilon OS=Homo sapiens OX=9606 GN=YWHAE PE=1 SV=1	0	2546.29	102	113.7	97.9	97	96.2	93.2	2	6.1	0.00777	50.906	105
AAFDVNNK	1xTMT6plex [K8]; 1xTMT6plex [N-Term]	0.00179088	0.000185426	1	P11274	BCR	Breakpoint cluster region protein OS=Homo sapiens OX=9606 GN=BCR PE=1 SV=2	0	1336.76							2	2.63	0.00176	18.6391	16
AAFEALQVK	1xTMT6plex [K9]; 1xTMT6plex [N-Term]	0.000275714	2.77511e-05	1	Q6UWE0	LRSAM1	E3 ubiquitin-protein ligase LRSAM1 OS=Homo sapiens OX=9606 GN=LRSAM1 PE=1 SV=1	0	1434.87							2	2.92	0.0021	29.3112	14
AAFECMYTLLDSCLDR	2xCarbamidomethyl [C5; C13]; 1xTMT6plex [N-Term]	8.77716e-08	0	4	Q86VP6	CAND1	Cullin-associated NEDD8-dissociated protein 1 OS=Homo sapiens OX=9606 GN=CAND1 PE=1 SV=2	0	2194.02	103.8	101.1	97.8	101.5	98.5	97.2	2	4.16	0.00457	52.2866	66
AAFFVTLDETEEGYR	1xTMT6plex [N-Term]	0.000213861	2.77511e-05	1	P50416	CPT1A	Carnitine O-palmitoyltransferase 1, liver isoform OS=Homo sapiens OX=9606 GN=CPT1A PE=1 SV=2	0	1976.98							3	6.07	0.004	42.3821	25
AAFFVTLDETEEGYRSEDPDTSMDSYAK	1xTMT6plex [K28]; 1xTMT6plex [N-Term]	3.84505e-05	0	1	P50416	CPT1A	Carnitine O-palmitoyltransferase 1, liver isoform OS=Homo sapiens OX=9606 GN=CPT1A PE=1 SV=2	1	3632.7							4	1.76	0.0016	43.578	23
AAFGCFGNWLATVEQR	1xCarbamidomethyl [C5]; 1xTMT6plex [N-Term]	1.42152e-06	0	2	Q8IWA0	WDR75	WD repeat-containing protein 75 OS=Homo sapiens OX=9606 GN=WDR75 PE=1 SV=1	0	2056.03	112.3	115	116	74.1	83.7	99	3	6.95	0.00476	50.7479	37
AAFGEEVDAVDTGISR	1xTMT6plex [N-Term]	6.7133e-07	0	2	O00273	DFFA	DNA fragmentation factor subunit alpha OS=Homo sapiens OX=9606 GN=DFFA PE=1 SV=1	0	1865.94	103.1	92.3	102.7	104.8	96.7	100.3	3	2.98	0.00186	31.1401	47
AAFGISDSYVDGSSFDPQR	1xTMT6plex [N-Term]	2.95306e-06	0	2	Q9UQ35	SRRM2	Serine/arginine repetitive matrix protein 2 OS=Homo sapiens OX=9606 GN=SRRM2 PE=1 SV=2	0	2248.07	98.8	103.4	105	96.8	101.8	94.1	2	1.68	0.00189	36.588	63
AAFGLSEAGFNTACVTK	1xCarbamidomethyl [C14]; 1xTMT6plex [K17]; 1xTMT6plex [N-Term]	1.59292e-09	0	2	P31040	SDHA	Succinate dehydrogenase [ubiquinone] flavoprotein subunit, mitochondrial OS=Homo sapiens OX=9606 GN=SDHA PE=1 SV=2	0	2202.16	101.7	104.5	95.5	101.9	101.1	95.2	2	3.21	0.00353	35.589	82
AAFLQYCR	1xCarbamidomethyl [C7]; 1xTMT6plex [N-Term]	0.00610749	0.000434844	1	Q8WUM0	NUP133	Nuclear pore complex protein Nup133 OS=Homo sapiens OX=9606 GN=NUP133 PE=1 SV=2	0	1257.66	99.4	102.1	97.2	98.2	94.5	108.5	2	2.84	0.00179	23.5956	1
AAFNSGK	1xTMT6plex [K7]; 1xTMT6plex [N-Term]	0.0129718	0.00107126	3	P04406	GAPDH	Glyceraldehyde-3-phosphate dehydrogenase OS=Homo sapiens OX=9606 GN=GAPDH PE=1 SV=3	0	1152.68	97.7	101.3	99.6	100.5	100.3	100.6	2	3.65	0.0021	12.4107	30
AAFPLHDCK	1xCarbamidomethyl [C8]; 1xTMT6plex [K9]; 1xTMT6plex [N-Term]	0.00261655	0.000201691	1	Q4KMQ2	ANO6	Anoctamin-6 OS=Homo sapiens OX=9606 GN=ANO6 PE=1 SV=2	0	1516.83	99.8	92.7	93.9	93.9	101	118.8	3	4.2	0.00212	17.1305	26
AAFPQYQPVVMLEK	1xTMT6plex [K14]; 1xTMT6plex [N-Term]	0.000196894	2.77511e-05	1	Q9UHN6	CEMIP2	Cell surface hyaluronidase OS=Homo sapiens OX=9606 GN=CEMIP2 PE=1 SV=1	0	2079.17	97.1	90	107	106.3	94.6	104.9	3	1.71	0.00118	40.1188	25
AAFQLDCSIVSR	1xCarbamidomethyl [C7]; 1xTMT6plex [N-Term]	0.000452245	3.92285e-05	1	O75054	IGSF3	Immunoglobulin superfamily member 3 OS=Homo sapiens OX=9606 GN=IGSF3 PE=2 SV=3	0	1595.84	96.8	99.3	95	107.4	97.6	103.8	2	1.42	0.00113	30.4216	19
AAFQLGSPWR	1xTMT6plex [N-Term]	0.000890855	9.98689e-05	1	P05091	ALDH2	Aldehyde dehydrogenase, mitochondrial OS=Homo sapiens OX=9606 GN=ALDH2 PE=1 SV=2	0	1361.75	116.4	112.3	103.4	87.1	88.1	92.6	2	2.15	0.00146	32.1208	41
AAFQLMQEDCIQK	1xCarbamidomethyl [C10]; 1xTMT6plex [K13]; 1xTMT6plex [N-Term]	6.9565e-05	2.77511e-05	1	Q9HCE0	EPG5	Ectopic P granules protein 5 homolog OS=Homo sapiens OX=9606 GN=EPG5 PE=1 SV=2	0	2040.07	93.7	89.2	94.4	112.2	101.5	109	3	1.73	0.00118	34.1772	30
AAFQSLLDAQADEAVLDHPDLK	1xTMT6plex [K22]; 1xTMT6plex [N-Term]	6.78037e-09	0	2	Q9UBI1	COMMD3	COMM domain-containing protein 3 OS=Homo sapiens OX=9606 GN=COMMD3 PE=1 SV=1	0	2825.51	98.5	95.3	98	103.1	104.8	100.3	3	0.19	0.00017	44.7087	81
AAFQSQYK	1xTMT6plex [K8]; 1xTMT6plex [N-Term]	0.00106425	0.000132543	1	Q86XP3	DDX42	ATP-dependent RNA helicase DDX42 OS=Homo sapiens OX=9606 GN=DDX42 PE=1 SV=1	0	1400.79	102.3	109.2	103.5	98.1	93.8	93.1	2	2.39	0.00167	17.2173	25
AAFQYGIK	1xTMT6plex [K8]; 1xTMT6plex [N-Term]	0.00051845	3.92285e-05	1	Q13123	IK	Protein Red OS=Homo sapiens OX=9606 GN=IK PE=1 SV=3	0	1355.81	106.3	105.9	112.7	90.4	98.5	86.1	2	2	0.00135	24.8405	37
AAFSEDGALMDGGMDLNMEQGMAEHLK	1xTMT6plex [K27]; 1xTMT6plex [N-Term]	3.16042e-05	0	1	Q9BTX3	TMEM208	Transmembrane protein 208 OS=Homo sapiens OX=9606 GN=TMEM208 PE=1 SV=1	0	3326.56	90.6	97.4	89.4	98.5	112.1	112	3	3.61	0.004	43.2053	37
AAFSQEK	1xTMT6plex [K7]; 1xTMT6plex [N-Term]	0.0105157	0.00084023	1	Q9UEW8	STK39	STE20/SPS1-related proline-alanine-rich protein kinase OS=Homo sapiens OX=9606 GN=STK39 PE=1 SV=3	0	1238.71	97.4	95.6	92.1	104.5	103.9	106.4	2	1.39	0.00086	14.1698	21
AAFTAFEEAQLPR	1xTMT6plex [N-Term]	5.89488e-05	1.80381e-05	1	Q96CT7	CCDC124	Coiled-coil domain-containing protein 124 OS=Homo sapiens OX=9606 GN=CCDC124 PE=1 SV=1	0	1679.9							3	3.48	0.00195	35.7626	27
AAFTCIK	1xCarbamidomethyl [C5]; 1xTMT6plex [K7]; 1xTMT6plex [N-Term]	0.00864925	0.000640067	1	Q7Z6Z7	HUWE1	E3 ubiquitin-protein ligase HUWE1 OS=Homo sapiens OX=9606 GN=HUWE1 PE=1 SV=3	0	1268.74	107.7	113.5	103.4	91.4	92.4	91.5	2	2.31	0.00146	21.6394	29
AAFTVSLDPGPLEQFPHSMEPQLR	1xTMT6plex [N-Term]	4.60601e-06	0	2	Q9UKD2	MRTO4	mRNA turnover protein 4 homolog OS=Homo sapiens OX=9606 GN=MRTO4 PE=1 SV=2	0	2896.49	97.7	102.9	101.6	99.1	99.1	99.5	3	1.43	0.00139	43.7652	25
AAFVLPEFAR	1xTMT6plex [N-Term]	0.0293563	0.00201328	1	P19623	SRM	Spermidine synthase OS=Homo sapiens OX=9606 GN=SRM PE=1 SV=1	0	1349.78	102.1	99.5	98.8	97.1	99.3	103.3	2	0.99	0.00067	37.8287	14
AAFVSEQQQK	1xTMT6plex [K10]; 1xTMT6plex [N-Term]	3.65079e-05	0	3	P26006	ITGA3	Integrin alpha-3 OS=Homo sapiens OX=9606 GN=ITGA3 PE=1 SV=5	0	1593.9	107.1	104.6	97	95.6	99.5	96.2	2	2.45	0.00195	16.5101	42
AAFYHQPWAQEAVGR	1xTMT6plex [N-Term]	3.51079e-05	0	1	Q92925	SMARCD2	SWI/SNF-related matrix-associated actin-dependent regulator of chromatin subfamily D member 2 OS=Homo sapiens OX=9606 GN=SMARCD2 PE=1 SV=3	0	1960	97.6	103.1	111	104.2	95.1	88.9	3	3.72	0.00243	24.1979	26
AAGALLNGPPQFSTAPEIK	1xTMT6plex [K19]; 1xTMT6plex [N-Term]	1.81614e-05	0	1	O75175	CNOT3	CCR4-NOT transcription complex subunit 3 OS=Homo sapiens OX=9606 GN=CNOT3 PE=1 SV=1	0	2340.33	100	94.8	106.4	103.2	93.3	102.3	3	3.33	0.0026	36.5989	16
AAGASDVVLYK	1xTMT6plex [K11]; 1xTMT6plex [N-Term]	6.13808e-06	0	2	Q9NSD9	FARSB	Phenylalanine--tRNA ligase beta subunit OS=Homo sapiens OX=9606 GN=FARSB PE=1 SV=3	0	1551.91	97.6	93.2	95.7	111.4	105.5	96.6	2	2.79	0.00216	24.2308	51
AAGCDFTNVVK	1xCarbamidomethyl [C4]; 1xTMT6plex [K11]; 1xTMT6plex [N-Term]	5.28953e-06	0	2	P52758	RIDA	2-iminobutanoate/2-iminopropanoate deaminase OS=Homo sapiens OX=9606 GN=RIDA PE=1 SV=1	0	1639.89	90.2	92.5	89.6	110	105.5	112.2	2	4.13	0.00339	23.71	56
AAGCNIPVASVAAGFPAGQTHLK	1xCarbamidomethyl [C4]; 1xTMT6plex [K23]; 1xTMT6plex [N-Term]	3.60255e-08	0	2	Q9Y315	DERA	Deoxyribose-phosphate aldolase OS=Homo sapiens OX=9606 GN=DERA PE=1 SV=2	0	2695.48							3	5.04	0.00453	30.3792	48
AAGDSNLK	1xTMT6plex [K8]; 1xTMT6plex [N-Term]	0.00727688	0.000523654	1	P30837	ALDH1B1	Aldehyde dehydrogenase X, mitochondrial OS=Homo sapiens OX=9606 GN=ALDH1B1 PE=1 SV=3	0	1233.72	105.4	101.9	101.3	100.3	96.4	94.7	2	2.43	0.0015	11.2461	7
AAGDVDIGDAAYYFER	1xTMT6plex [N-Term]	8.40325e-09	0	2	P09758	TACSTD2	Tumor-associated calcium signal transducer 2 OS=Homo sapiens OX=9606 GN=TACSTD2 PE=1 SV=3	0	1961.94	93	98.1	96.5	111.7	100.6	100.1	2	1.44	0.00142	39.1847	81
AAGEVLEPANLLAEEKDEDLLFE	1xTMT6plex [K16]; 1xTMT6plex [N-Term]	0.00590898	0.000414811	1	Q9Y5K8	ATP6V1D	V-type proton ATPase subunit D OS=Homo sapiens OX=9606 GN=ATP6V1D PE=1 SV=1	1	2973.57	103	98.7	95.5	107.9	96	98.9	4	5.36	0.00399	51.6223	5
AAGFDEIEQDLTQR	1xTMT6plex [N-Term]	9.58502e-05	2.77511e-05	1	O95786	DDX58	Antiviral innate immune response receptor RIG-I OS=Homo sapiens OX=9606 GN=DDX58 PE=1 SV=2	0	1821.92							3	5.15	0.00313	37.9595	19
AAGFERPSPVQLK	1xTMT6plex [K13]; 1xTMT6plex [N-Term]	0.000208008	2.77511e-05	1	Q9UHI6	DDX20	Probable ATP-dependent RNA helicase DDX20 OS=Homo sapiens OX=9606 GN=DDX20 PE=1 SV=2	0	1858.1	104.9	101.6	100.3	94.6	93.6	104.9	3	2.78	0.00172	20.8559	10
AAGFKDPLLASGTDGVGTK	2xTMT6plex [K5; K19]; 1xTMT6plex [N-Term]	2.45833e-07	0	1	P22102	GART	Trifunctional purine biosynthetic protein adenosine-3 OS=Homo sapiens OX=9606 GN=GART PE=1 SV=1	1	2492.43	105.8	99.9	103.1	96.8	100.7	93.7	3	0.5	0.00041	29.7992	49
AAGGATPK	1xTMT6plex [K8]; 1xTMT6plex [N-Term]	0.00516566	0.000395322	1	P16403	H1-2	Histone H1.2 OS=Homo sapiens OX=9606 GN=H1-2 PE=1 SV=2	0	1130.69	123.9	139.6	123.8	66.6	75.6	70.5	2	1.86	0.00105	8.5395	20
AAGGGSYK	1xTMT6plex [K8]; 1xTMT6plex [N-Term]	0.0015454	0.000164178	1	Q92499	DDX1	ATP-dependent RNA helicase DDX1 OS=Homo sapiens OX=9606 GN=DDX1 PE=1 SV=2	0	1168.67	99.1	101.8	92.3	102.3	103.7	100.8	2	2.1	0.00123	9.9114	27
AAGGIELFVGGIGPDGHIAFNEPGSSLVSR	1xTMT6plex [N-Term]	1.6818e-08	0	2	P46926	GNPDA1	Glucosamine-6-phosphate isomerase 1 OS=Homo sapiens OX=9606 GN=GNPDA1 PE=1 SV=1	0	3153.65	101.9	100.2	99.7	103.8	97.6	96.8	3	4.26	0.00448	46.3819	61
AAGHPGDPESQQR	1xTMT6plex [N-Term]	6.97785e-05	2.77511e-05	1	Q9Y490	TLN1	Talin-1 OS=Homo sapiens OX=9606 GN=TLN1 PE=1 SV=3	0	1578.78	108.9	102.9	101.2	94.2	96.8	96	3	1.97	0.00104	7.2493	34
AAGKGDVPTK	2xTMT6plex [K4; K10]; 1xTMT6plex [N-Term]	0.12729	0.00479402	1	P62424	RPL7A	60S ribosomal protein L7a OS=Homo sapiens OX=9606 GN=RPL7A PE=1 SV=2	1	1631.01	90.4	90.5	94.4	105.8	99.2	119.7	3	3.73	0.00203	12.4053	4
AAGLATMISTMRPDIDNMDEYVR	1xTMT6plex [N-Term]	8.42254e-05	2.77511e-05	1	O75533	SF3B1	Splicing factor 3B subunit 1 OS=Homo sapiens OX=9606 GN=SF3B1 PE=1 SV=3	0	2799.37	108.4	97.8	99.8	94.3	91.1	108.6	4	2.66	0.00186	46.3205	23
AAGIDEQENWHEGK	1xTMT6plex [K14]; 1xTMT6plex [N-Term]	4.80644e-06	0	1	P28838	LAP3	Cytosol aminopeptidase OS=Homo sapiens OX=9606 GN=LAP3 PE=1 SV=3	0	2042.03	107.9	103.3	101.6	88.3	95	104	3	3.29	0.00224	17.3728	39
AAGLEPVGHYEEVELTETSVNVGPER	1xTMT6plex [N-Term]	4.7219e-06	0	1	Q9UBS0	RPS6KB2	Ribosomal protein S6 kinase beta-2 OS=Homo sapiens OX=9606 GN=RPS6KB2 PE=1 SV=2	0	3011.52	100.7	97.9	96.2	95.3	92.9	116.9	4	1.97	0.00149	32.7206	32
AAGIIHLGATSCYVGDNTDLIILR	1xCarbamidomethyl [C12]; 1xTMT6plex [N-Term]	0.00347462	0.000252074	1	P30566	ADSL	Adenylosuccinate lyase OS=Homo sapiens OX=9606 GN=ADSL PE=1 SV=2	0	2772.49	95.8	97.9	103.6	105.3	96.6	100.7	3	1.93	0.00179	41.2771	2
AAGLQAEIGQVK	1xTMT6plex [K12]; 1xTMT6plex [N-Term]	6.76146e-07	0	1	Q8IUD2	ERC1	ELKS/Rab6-interacting/CAST family member 1 OS=Homo sapiens OX=9606 GN=ERC1 PE=1 SV=1	0	1642.99	91.6	99.8	96.6	102.8	104.1	105.2	2	3.54	0.00291	26.243	72
AAGLVSDLDADSGLTLSR	1xTMT6plex [N-Term]	3.33303e-06	0	1	Q9BW92	TARS2	Threonine--tRNA ligase, mitochondrial OS=Homo sapiens OX=9606 GN=TARS2 PE=1 SV=1	0	1990.07	110.4	93.8	106.2	96.8	100.6	92.2	3	2.32	0.00154	38.5313	45
AAGMNMEEEEELQQNLWGLK	1xTMT6plex [K20]; 1xTMT6plex [N-Term]	8.13925e-05	2.77511e-05	2	Q13144	EIF2B5	Translation initiation factor eIF-2B subunit epsilon OS=Homo sapiens OX=9606 GN=EIF2B5 PE=1 SV=3	0	2778.38	97.7	101.7	94	103.3	97.7	105.7	3	-1.44	-0.00133	47.0602	17
AAGNESFR	1xTMT6plex [N-Term]	0.0266684	0.0019101	1	Q15785	TOMM34	Mitochondrial import receptor subunit TOM34 OS=Homo sapiens OX=9606 GN=TOMM34 PE=1 SV=2	0	1080.56							2	0.33	0.00018	9.551	15
AAGNFATK	1xTMT6plex [K8]; 1xTMT6plex [N-Term]	0.00147922	0.000153798	1	P55196	AFDN	Afadin OS=Homo sapiens OX=9606 GN=AFDN PE=1 SV=3	0	1237.73	84.7	93.8	92.6	110	110.6	108.3	2	1.1	0.00068	14.5013	34
AAGPEPQALDEFTSLLIADDTR	1xTMT6plex [N-Term]	4.91903e-07	0	1	O95714	HERC2	E3 ubiquitin-protein ligase HERC2 OS=Homo sapiens OX=9606 GN=HERC2 PE=1 SV=2	0	2559.31	93.5	111.9	114.4	99.7	85.4	95.1	3	4.66	0.00397	52.1698	79
AAGPGLGNVAMGPR	1xTMT6plex [N-Term]	1.24559e-06	0	1	O14497	ARID1A	AT-rich interactive domain-containing protein 1A OS=Homo sapiens OX=9606 GN=ARID1A PE=1 SV=3	0	1496.82	103.2	100.3	105.6	94.9	93.8	102.3	2	2.19	0.00164	20.266	52
AAGSGELGVTMK	1xTMT6plex [K12]; 1xTMT6plex [N-Term]	4.19312e-05	0	1	O75369	FLNB	Filamin-B OS=Homo sapiens OX=9606 GN=FLNB PE=1 SV=2	0	1578.89	93.5	94.2	103.4	100	104.9	104	3	3.06	0.00161	21.3853	45
AAGSGELGVTMK	1xOxidation [M11]; 1xTMT6plex [K12]; 1xTMT6plex [N-Term]	0.000304021	2.77511e-05	3	O75369	FLNB	Filamin-B OS=Homo sapiens OX=9606 GN=FLNB PE=1 SV=2	0	1594.89	101.4	95.2	97.1	104	101	101.1	2	6.14	0.0049	16.3923	37
AAGSPSSSDQDEKLPGQDESTAGTSEQNDILK	2xTMT6plex [K13; K32]; 1xTMT6plex [N-Term]	1.37236e-05	0	1	Q9Y520	PRRC2C	Protein PRRC2C OS=Homo sapiens OX=9606 GN=PRRC2C PE=1 SV=4	1	3949.97	100.7	105.1	90.7	106.9	95.5	101.1	4	3.11	0.00307	24.5349	37
AAGSSGFEAVEVAWPYAETPEALAR	1xTMT6plex [N-Term]	6.95662e-08	0	1	Q5T013	HYI	Putative hydroxypyruvate isomerase OS=Homo sapiens OX=9606 GN=HYI PE=1 SV=2	0	2808.4	101.5	104	96.3	104.2	93.1	101	3	2.12	0.00198	46.2322	41
AAGTAAALAFLSQESR	1xAcetyl [N-Term]; 1xTMT6plex [N-Term]	2.31448e-05	0	2	O75607	NPM3	Nucleoplasmin-3 OS=Homo sapiens OX=9606 GN=NPM3 PE=1 SV=3	0	1834.99							2	-124883	-114.579	50.9849	87
AAGTCGVLLR	1xCarbamidomethyl [C5]; 1xTMT6plex [N-Term]	0.000462607	3.92285e-05	1	Q5T653	MRPL2	39S ribosomal protein L2, mitochondrial OS=Homo sapiens OX=9606 GN=MRPL2 PE=1 SV=2	0	1246.71	95.4	96.1	93.7	101.5	102.1	111.2	2	1.08	0.00067	16.8024	28
AAGTDGSDFQHR	1xTMT6plex [N-Term]	2.6162e-06	0	3	Q8N5M9	JAGN1	Protein jagunal homolog 1 OS=Homo sapiens OX=9606 GN=JAGN1 PE=1 SV=1	0	1490.72	98.3	99.9	100.2	97.4	96.7	107.5	3	1.48	0.00073	8.6818	78
AAGTLYTYPENWR	1xAcetyl [N-Term]; 1xTMT6plex [N-Term]	0.00080783	7.57932e-05	1	P26641	EEF1G	Elongation factor 1-gamma OS=Homo sapiens OX=9606 GN=EEF1G PE=1 SV=3	0	1812.91							2	-126404	-114.58	38.5828	51
AAGVAGWGVEAEEFEDAPDVEPLEPTLSNIIEQR	1xAcetyl [N-Term]; 1xTMT6plex [N-Term]	4.04819e-05	0	1	O43681	ASNA1	ATPase ASNA1 OS=Homo sapiens OX=9606 GN=ASNA1 PE=1 SV=2	0	3909.92							3	-58608.3	-76.3846	54.9856	89
AAGVEAAAEVAATEIK	1xAcetyl [N-Term]; 1xTMT6plex [K16]; 1xTMT6plex [N-Term]	9.28474e-05	2.77511e-05	3	P52272	HNRNPM	Heterogeneous nuclear ribonucleoprotein M OS=Homo sapiens OX=9606 GN=HNRNPM PE=1 SV=3	0	2001.13	106	103.5	106.3	92	96.2	96	2	-114513	-114.577	50.7721	88
AAGVNVEPFWPGLFAK	1xTMT6plex [K16]; 1xTMT6plex [N-Term]	1.14363e-07	0	4	P05386	RPLP1	60S acidic ribosomal protein P1 OS=Homo sapiens OX=9606 GN=RPLP1 PE=1 SV=1	0	2161.22	110.1	128.6	116.3	79.7	84.7	80.6	2	3.38	0.00365	50.4364	78
AAGVPQVNSK	1xTMT6plex [K10]; 1xTMT6plex [N-Term]	0.00128025	0.000142151	1	Q96SB3	PPP1R9B	Neurabin-2 OS=Homo sapiens OX=9606 GN=PPP1R9B PE=1 SV=3	0	1428.86	100.5	101.1	98.8	95.5	96.7	107.4	2	3.15	0.00225	14.8571	30
AAGVVLEMIR	1xTMT6plex [N-Term]	0.000398773	3.92285e-05	1	Q9Y230	RUVBL2	RuvB-like 2 OS=Homo sapiens OX=9606 GN=RUVBL2 PE=1 SV=3	0	1287.77	100.3	106.7	98.1	108.9	92.9	93.2	3	3.43	0.00147	36.3394	45
AAGWSELSER	1xTMT6plex [N-Term]	0.00261655	0.000201691	1	Q9H0N5	PCBD2	Pterin-4-alpha-carbinolamine dehydratase 2 OS=Homo sapiens OX=9606 GN=PCBD2 PE=1 SV=4	0	1334.69							2	1.03	0.00069	21.1576	16
AAGYDLYSAYDYTIPPMEK	1xTMT6plex [K19]; 1xTMT6plex [N-Term]	0.000129149	2.77511e-05	1	P33316	DUT	Deoxyuridine 5'-triphosphate nucleotidohydrolase, mitochondrial OS=Homo sapiens OX=9606 GN=DUT PE=1 SV=4	0	2626.32	100.6	110.3	105.9	96.1	93.6	93.4	3	-6.09	-0.00534	43.5861	11
AAHEALGQFCCALHK	2xCarbamidomethyl [C10; C11]; 1xTMT6plex [K15]; 1xTMT6plex [N-Term]	6.80997e-07	0	1	Q8TEX9	IPO4	Importin-4 OS=Homo sapiens OX=9606 GN=IPO4 PE=1 SV=2	0	2171.13	100.1	96.5	103.5	93.3	106.9	99.7	4	2.68	0.00146	22.383	46
AAHGVLLQALDEMR	1xTMT6plex [N-Term]	7.80514e-06	0	1	Q8WZA9	IRGQ	Immunity-related GTPase family Q protein OS=Homo sapiens OX=9606 GN=IRGQ PE=1 SV=1	0	1752.96	94.7	94.4	102.4	100.9	104.4	103.2	3	3.41	0.00199	32.1932	45
AAHIFNEALVCHQIR	1xCarbamidomethyl [C11]; 1xTMT6plex [N-Term]	5.0155e-06	0	2	O43795	MYO1B	Unconventional myosin-Ib OS=Homo sapiens OX=9606 GN=MYO1B PE=1 SV=3	0	2008.07	95.7	88.4	95.2	106.4	108.5	105.8	4	3.18	0.0016	21.379	50
AAHSEGNTTAGLDMR	1xTMT6plex [N-Term]	7.96927e-08	0	1	P78371	CCT2	T-complex protein 1 subunit beta OS=Homo sapiens OX=9606 GN=CCT2 PE=1 SV=4	0	1759.86	99.4	105.2	110.4	91.2	98.7	95	2	1.23	0.00108	10.1555	91
AAHVFFTDSCPDALFNELVK	1xCarbamidomethyl [C10]; 1xTMT6plex [K20]; 1xTMT6plex [N-Term]	1.28451e-05	0	1	P61764	STXBP1	Syntaxin-binding protein 1 OS=Homo sapiens OX=9606 GN=STXBP1 PE=1 SV=1	0	2739.42	89.9	93.9	115	104.3	98	98.8	4	3.79	0.0026	47.3676	37
AAKPEQIQK	2xTMT6plex [K3; K9]; 1xTMT6plex [N-Term]	0.00785275	0.000562563	2	Q99986	VRK1	Serine/threonine-protein kinase VRK1 OS=Homo sapiens OX=9606 GN=VRK1 PE=1 SV=1	0	1700.07	115.6	107	110.5	89.5	90	87.3	2	0.83	0.0007	12.829	22
AAKPTTTPEVK	2xTMT6plex [K3; K11]; 1xTMT6plex [N-Term]	0.000239428	2.77511e-05	2	P46821	MAP1B	Microtubule-associated protein 1B OS=Homo sapiens OX=9606 GN=MAP1B PE=1 SV=2	0	1830.13	77.8	80.7	79.2	124.2	123.9	114.2	2	2.37	0.00217	13.2993	29
AALAATLEEYK	1xTMT6plex [K11]; 1xTMT6plex [N-Term]	8.79838e-06	0	1	Q69YQ0	SPECC1L	Cytospin-A OS=Homo sapiens OX=9606 GN=SPECC1L PE=1 SV=2	0	1637.95							2	4.93	0.00404	35.2961	34
AALADVLR	1xTMT6plex [N-Term]	0.00249833	0.000201691	1	Q9HC35	EML4	Echinoderm microtubule-associated protein-like 4 OS=Homo sapiens OX=9606 GN=EML4 PE=1 SV=3	0	1057.66	95.3	101.8	95.1	105.7	99.9	102.3	2	2.73	0.00144	25.623	27
AALAHSEEVTASQVAATK	1xTMT6plex [K18]; 1xTMT6plex [N-Term]	2.74963e-11	0	5	Q15149	PLEC	Plectin OS=Homo sapiens OX=9606 GN=PLEC PE=1 SV=3	0	2242.24	95	97.7	93.3	102.4	106.4	105.1	2	0.48	0.00054	21.5517	136
AALANLCIGDVITAIDGENTSNMTHLEAQNR	1xCarbamidomethyl [C7]; 1xTMT6plex [N-Term]	2.50874e-09	0	2	O00151	PDLIM1	PDZ and LIM domain protein 1 OS=Homo sapiens OX=9606 GN=PDLIM1 PE=1 SV=4	0	3541.76	88.1	104.2	108	99.8	94.4	105.6	4	0.78	0.00069	50.3705	70
AALAPAK	1xTMT6plex [K7]; 1xTMT6plex [N-Term]	0.0866021	0.0038363	1	Q13428	TCOF1	Treacle protein OS=Homo sapiens OX=9606 GN=TCOF1 PE=1 SV=3	0	1099.72	96.5	102.6	103.1	93.4	107.4	96.9	2	1.31	0.00072	12.9417	17
AALAPLPPLPAQFK	1xAcetyl [N-Term]; 1xTMT6plex [K14]; 1xTMT6plex [N-Term]	7.55758e-05	2.77511e-05	5	Q9NP79	VTA1	Vacuolar protein sorting-associated protein VTA1 homolog OS=Homo sapiens OX=9606 GN=VTA1 PE=1 SV=1	0	1934.19	109.1	99.6	112.2	94.7	89.5	95	3	-118476	-76.385	50.8064	80
AAIAQALAGEVSVVPPSR	1xTMT6plex [N-Term]	1.03097e-07	0	1	Q2TAY7	SMU1	WD40 repeat-containing protein SMU1 OS=Homo sapiens OX=9606 GN=SMU1 PE=1 SV=2	0	1965.13	98.7	82.3	107.9	95.8	96.9	118.4	3	3.66	0.0024	38.3919	78
AALASEEPR	1xTMT6plex [N-Term]	0.00243514	0.000201691	1	Q6ZMZ3	SYNE3	Nesprin-3 OS=Homo sapiens OX=9606 GN=SYNE3 PE=1 SV=2	0	1172.65							2	2.29	0.00134	11.8913	19
AALAVLK	1xTMT6plex [K7]; 1xTMT6plex [N-Term]	0.0172589	0.00148493	1	P20248	CCNA2	Cyclin-A2 OS=Homo sapiens OX=9606 GN=CCNA2 PE=1 SV=2	0	1143.79							2	2.13	0.00122	25.2161	11
AALCHFCIDMLNAK	2xCarbamidomethyl [C4; C7]; 1xTMT6plex [K14]; 1xTMT6plex [N-Term]	1.84761e-05	0	1	P54920	NAPA	Alpha-soluble NSF attachment protein OS=Homo sapiens OX=9606 GN=NAPA PE=1 SV=3	0	2122.1	101.5	104.9	102	95.3	96.7	99.6	3	2.58	0.00183	34.9164	34
AALDEAQGVGLDSTGYYDQEIYGGSDSR	1xTMT6plex [N-Term]	3.79866e-09	0	1	O75533	SF3B1	Splicing factor 3B subunit 1 OS=Homo sapiens OX=9606 GN=SF3B1 PE=1 SV=3	0	3166.47	113	89.9	91	97.1	109.8	99.2	3	3.29	0.00348	38.4367	104
AALDGTPGMIGYGMAK	1xTMT6plex [K16]; 1xTMT6plex [N-Term]	3.5916e-06	0	1	P09417	QDPR	Dihydropteridine reductase OS=Homo sapiens OX=9606 GN=QDPR PE=1 SV=2	0	2011.08							3	3.12	0.00209	34.0483	35
AALDSGAFQSVWVSTDHDEIENVAK	1xTMT6plex [K25]; 1xTMT6plex [N-Term]	4.67728e-08	0	1	Q8NFW8	CMAS	N-acylneuraminate cytidylyltransferase OS=Homo sapiens OX=9606 GN=CMAS PE=1 SV=2	0	3147.6	108.2	91.5	98	86.1	101.9	114.3	3	2.89	0.00303	40.4561	61
AALDSLSLFTSLGLSEQK	1xAcetyl [N-Term]; 1xTMT6plex [K18]; 1xTMT6plex [N-Term]	0.000219043	2.77511e-05	1	P47897	QARS	Glutamine--tRNA ligase OS=Homo sapiens OX=9606 GN=QARS PE=1 SV=1	0	2380.34	95.7	91.4	102.2	103.7	107.3	99.7	3	-96266.8	-76.3825	55.2959	81
AAIDWFDGK	1xTMT6plex [K9]; 1xTMT6plex [N-Term]	0.000187239	2.77511e-05	2	P35637; Q92804	FUS; TAF15	RNA-binding protein FUS OS=Homo sapiens OX=9606 GN=FUS PE=1 SV=1;TATA-binding protein-associated factor 2N OS=Homo sapiens OX=9606 GN=TAF15 PE=1 SV=1	0	1480.82	107.2	105.8	112.8	93.5	94.3	86.4	2	2.28	0.00169	38.0165	39
AAIDWFDGKEFHGNIIK	2xTMT6plex [K9; K17]; 1xTMT6plex [N-Term]	8.08524e-06	0	1	Q92804	TAF15	TATA-binding protein-associated factor 2N OS=Homo sapiens OX=9606 GN=TAF15 PE=1 SV=1	1	2648.48	98.8	89	104.5	102.3	104.5	100.8	4	2.67	0.00177	37.1836	12
AAIDWFDGKEFSGNPIK	2xTMT6plex [K9; K17]; 1xTMT6plex [N-Term]	2.46241e-06	0	2	P35637	FUS	RNA-binding protein FUS OS=Homo sapiens OX=9606 GN=FUS PE=1 SV=1	1	2582.42	92.7	96	106.5	98.1	104.3	102.5	3	5.64	0.00485	41.4876	23
AALEAAAAAAPER	1xTMT6plex [N-Term]	0.00895385	0.000658429	1	Q86UK7	ZNF598	E3 ubiquitin-protein ligase ZNF598 OS=Homo sapiens OX=9606 GN=ZNF598 PE=1 SV=1	0	1440.8	103	93.7	104.4	95.8	98.1	104.9	2	0.61	0.00044	20.3026	36
AALEACHK	1xCarbamidomethyl [C6]; 1xTMT6plex [K8]; 1xTMT6plex [N-Term]	0.00147922	0.000153798	2	P11766	ADH5	Alcohol dehydrogenase class-3 OS=Homo sapiens OX=9606 GN=ADH5 PE=1 SV=4	0	1357.77	86.8	88.6	87.3	114.5	100.8	122	2	1.93	0.00131	10.3904	28
AAIEAFNK	1xTMT6plex [K8]; 1xTMT6plex [N-Term]	0.000756934	7.57932e-05	2	Q9UHB9	SRP68	Signal recognition particle subunit SRP68 OS=Homo sapiens OX=9606 GN=SRP68 PE=1 SV=2	0	1321.79	100.7	103.4	100.3	97.1	101.5	96.9	2	2.13	0.00141	22.951	33
AALEALGSCLNNK	1xCarbamidomethyl [C9]; 1xTMT6plex [K13]; 1xTMT6plex [N-Term]	3.88513e-07	0	2	P34897	SHMT2	Serine hydroxymethyltransferase, mitochondrial OS=Homo sapiens OX=9606 GN=SHMT2 PE=1 SV=3	0	1819.01	101.7	97.7	100	94.7	102.6	103.3	3	3.6	0.00218	33.5837	55
AALEALLPYTER	1xTMT6plex [N-Term]	3.85748e-05	0	2	Q12788	TBL3	Transducin beta-like protein 3 OS=Homo sapiens OX=9606 GN=TBL3 PE=1 SV=2	0	1575.89	104	104.3	102.7	96	90.9	102	3	2.95	0.00155	40.0826	54
AALEAQNALHNMK	1xTMT6plex [K13]; 1xTMT6plex [N-Term]	4.71247e-07	0	2	Q92879	CELF1	CUGBP Elav-like family member 1 OS=Homo sapiens OX=9606 GN=CELF1 PE=1 SV=2	0	1869.04	100	98.2	99.9	97.6	106.3	98.1	2	-4.18	-0.00391	22.4401	42
AALEAVGGTVVLE	1xTMT6plex [N-Term]	0.000212168	2.77511e-05	3	P52815	MRPL12	39S ribosomal protein L12, mitochondrial OS=Homo sapiens OX=9606 GN=MRPL12 PE=1 SV=2	0	1457.84	94.9	94.7	96.9	108.1	100	105.3	3	5.05	0.00245	40.4065	40
AALEDSSGSSELQEIMR	1xTMT6plex [N-Term]	6.85781e-08	0	1	Q12929	EPS8	Epidermal growth factor receptor kinase substrate 8 OS=Homo sapiens OX=9606 GN=EPS8 PE=1 SV=1	0	2052.01	93	98.8	95.5	105.9	102.3	104.5	2	0.05	5e-05	33.882	53
AALEDTLAETEAR	1xTMT6plex [N-Term]	2.83634e-07	0	3	P08727	KRT19	Keratin, type I cytoskeletal 19 OS=Homo sapiens OX=9606 GN=KRT19 PE=1 SV=4	0	1618.85	96	103.7	97.2	104.7	99.4	99.1	2	1.21	0.00098	26.5347	61
AALEEEFTLSSVVLSAGPEGLLGVEQSDK	1xAcetyl [N-Term]; 1xTMT6plex [K29]; 1xTMT6plex [N-Term]	0.00166313	0.000174676	1	Q9H8H0	NOL11	Nucleolar protein 11 OS=Homo sapiens OX=9606 GN=NOL11 PE=1 SV=1	0	3475.85	115	122.1	97.1	92.7	77.8	95.2	3	-65922.2	-76.3785	55.668	57
AALEEEVR	1xTMT6plex [N-Term]	0.0284236	0.0020067	1	Q96FS4	SIPA1	Signal-induced proliferation-associated protein 1 OS=Homo sapiens OX=9606 GN=SIPA1 PE=1 SV=1	0	1145.64	103	101.7	99.1	100.5	95.3	100.3	2	1.73	0.00099	14.772	14
AALEELQR	1xTMT6plex [N-Term]	0.000920436	9.98689e-05	1	Q96CW5	TUBGCP3	Gamma-tubulin complex component 3 OS=Homo sapiens OX=9606 GN=TUBGCP3 PE=1 SV=2	0	1158.67							2	2.65	0.00153	18.6029	33
AALEEVEGDVAELELK	1xTMT6plex [K16]; 1xTMT6plex [N-Term]	3.33147e-07	0	2	Q15057	ACAP2	Arf-GAP with coiled-coil, ANK repeat and PH domain-containing protein 2 OS=Homo sapiens OX=9606 GN=ACAP2 PE=1 SV=3	0	2173.2	101.1	93.8	100.5	101.3	100.9	102.4	2	7.12	0.00773	50.5201	54
AALEEVER	1xTMT6plex [N-Term]	0.00134955	0.000142151	1	Q15149	PLEC	Plectin OS=Homo sapiens OX=9606 GN=PLEC PE=1 SV=3	0	1145.64	92.5	103.5	97.2	101.6	104.6	100.7	2	3.01	0.00172	15.3123	33
AALEEVYPDLTPEETR	1xTMT6plex [N-Term]	6.09572e-07	0	1	Q9H0D6	XRN2	5'-3' exoribonuclease 2 OS=Homo sapiens OX=9606 GN=XRN2 PE=1 SV=1	0	2062.05	103.5	105.3	107.4	93.9	88.6	101.3	2	1.57	0.00162	34.0917	65
AALELLSLDLK	1xTMT6plex [K11]; 1xTMT6plex [N-Term]	0.000358561	3.92285e-05	1	Q9BV73	CEP250	Centrosome-associated protein CEP250 OS=Homo sapiens OX=9606 GN=CEP250 PE=1 SV=2	0	1644.03	98.7	88.7	110.5	116.3	87.1	98.7	3	7.34	0.00402	49.563	44
AALEQDLAFWYGPR	1xTMT6plex [N-Term]	3.6746e-05	0	1	P09601	HMOX1	Heme oxygenase 1 OS=Homo sapiens OX=9606 GN=HMOX1 PE=1 SV=1	0	1865.97	97	106.3	127.6	81.5	83.2	104.4	3	3.31	0.00206	47.4681	38
AALESQVR	1xTMT6plex [N-Term]	0.00279781	0.000222687	1	Q5M775	SPECC1	Cytospin-B OS=Homo sapiens OX=9606 GN=SPECC1 PE=1 SV=1	0	1102.64							2	2.42	0.00133	11.7564	19
AALETDENLLLCAPTGAGK	1xCarbamidomethyl [C12]; 1xTMT6plex [K19]; 1xTMT6plex [N-Term]	3.38787e-09	0	2	O75643	SNRNP200	U5 small nuclear ribonucleoprotein 200 kDa helicase OS=Homo sapiens OX=9606 GN=SNRNP200 PE=1 SV=2	0	2402.3	108.2	99.6	100.5	100.1	93.2	98.4	2	2.93	0.00352	38.1424	100
AALEYLEDIDLK	1xTMT6plex [K12]; 1xTMT6plex [N-Term]	6.36528e-05	2.77511e-05	1	Q9BRX8	PRXL2A	Peroxiredoxin-like 2A OS=Homo sapiens OX=9606 GN=PRXL2A PE=1 SV=3	0	1851.05	98.7	107.5	91.8	102.2	101.3	98.6	3	3.59	0.00222	47.7174	46
AALFALQNLFEEK	1xTMT6plex [K13]; 1xTMT6plex [N-Term]	1.91212e-05	0	1	Q99707	MTR	Methionine synthase OS=Homo sapiens OX=9606 GN=MTR PE=1 SV=2	0	1952.13	107.1	110.2	108.3	94.5	90.9	88.9	3	4.84	0.00315	52.6864	48
AALFVEACLK	1xCarbamidomethyl [C8]; 1xTMT6plex [K10]; 1xTMT6plex [N-Term]	5.87676e-05	1.80381e-05	2	Q9BZH6	WDR11	WD repeat-containing protein 11 OS=Homo sapiens OX=9606 GN=WDR11 PE=1 SV=1	0	1579.93	96	86.5	91.3	109.3	102.6	114.2	2	1.12	0.00089	36.1614	29
AALGHLAGEAAAAPGPGTPCASR	1xAcetyl [N-Term]; 1xCarbamidomethyl [C20]; 1xTMT6plex [N-Term]	7.60426e-05	2.77511e-05	1	Q9H7E9	C8orf33	UPF0488 protein C8orf33 OS=Homo sapiens OX=9606 GN=C8orf33 PE=1 SV=1	0	2374.21							3	-96520.9	-76.3871	26.6312	38
AAIGLLAR	1xTMT6plex [N-Term]	0.00205955	0.000201691	2	P07741	APRT	Adenine phosphoribosyltransferase OS=Homo sapiens OX=9606 GN=APRT PE=1 SV=2	0	1013.67	99.2	101.6	103.2	101.4	97.6	97	2	4.01	0.00203	22.965	18
AALGPLVTGLYDVQAFK	1xTMT6plex [K17]; 1xTMT6plex [N-Term]	1.45749e-06	0	2	P11172	UMPS	Uridine 5'-monophosphate synthase OS=Homo sapiens OX=9606 GN=UMPS PE=1 SV=1	0	2221.3	104	119.6	110.6	84.8	90.5	90.6	3	3.71	0.00274	51.6332	43
AALGPSSQNVTEYVVR	1xAcetyl [N-Term]; 1xTMT6plex [N-Term]	0.000218168	2.77511e-05	1	P35269	GTF2F1	General transcription factor IIF subunit 1 OS=Homo sapiens OX=9606 GN=GTF2F1 PE=1 SV=2	0	1962.05							3	-116795	-76.386	34.661	32
AALGVLESDLPSAVTLLK	1xAcetyl [N-Term]; 1xTMT6plex [K18]; 1xTMT6plex [N-Term]	2.92832e-05	0	1	Q8NEJ9	NGDN	Neuroguidin OS=Homo sapiens OX=9606 GN=NGDN PE=1 SV=1	0	2297.37	111.3	105.9	108.4	90	88.7	95.7	2	-99747.1	-114.578	55.3345	100
AALLAELALLEPEALR	1xTMT6plex [N-Term]	1.01997e-07	0	2	Q3KQV9	UAP1L1	UDP-N-acetylhexosamine pyrophosphorylase-like protein 1 OS=Homo sapiens OX=9606 GN=UAP1L1 PE=1 SV=2	0	1922.15	99	97.2	97.7	101.8	98.4	105.9	2	4.32	0.00416	53.5663	74
AAILDLEK	1xTMT6plex [K8]; 1xTMT6plex [N-Term]	0.000661765	7.57932e-05	1	Q15075	EEA1	Early endosome antigen 1 OS=Homo sapiens OX=9606 GN=EEA1 PE=1 SV=2	0	1330.83	101.6	106.5	96.8	99.7	97.6	97.8	2	3.5	0.00233	30.1894	46
AALLEAGMPECTEDK	1xCarbamidomethyl [C11]; 1xTMT6plex [K15]; 1xTMT6plex [N-Term]	1.43578e-05	0	1	Q9C0C9	UBE2O	(E3-independent) E2 ubiquitin-conjugating enzyme OS=Homo sapiens OX=9606 GN=UBE2O PE=1 SV=3	0	2093.07	101.1	97.2	101.1	98.7	101.7	100.2	3	1.25	0.00087	30.7958	45
AALLELWELR	1xTMT6plex [N-Term]	3.56854e-05	0	2	Q13813	SPTAN1	Spectrin alpha chain, non-erythrocytic 1 OS=Homo sapiens OX=9606 GN=SPTAN1 PE=1 SV=3	0	1442.86	103	111.3	106	95.1	93.4	91.2	3	4.7	0.00226	50.2626	61
AALLELWELRR	1xTMT6plex [N-Term]	1.39158e-05	0	1	Q13813	SPTAN1	Spectrin alpha chain, non-erythrocytic 1 OS=Homo sapiens OX=9606 GN=SPTAN1 PE=1 SV=3	1	1598.96	80.2	76.9	94.6	107.6	113.6	127.2	3	3.36	0.00179	39.738	43
AAILETAPK	1xTMT6plex [K9]; 1xTMT6plex [N-Term]	8.82739e-05	2.77511e-05	2	Q9P2E9	RRBP1	Ribosome-binding protein 1 OS=Homo sapiens OX=9606 GN=RRBP1 PE=1 SV=5	0	1371.86	86.9	89	95.6	116.1	108.1	104.3	2	1.13	0.00077	21.7996	51
AALLHGETR	1xTMT6plex [N-Term]	0.00501676	0.000395322	1	P78346	RPP30	Ribonuclease P protein subunit p30 OS=Homo sapiens OX=9606 GN=RPP30 PE=1 SV=1	0	1196.69							3	3.09	0.00123	10.4844	11
AALLNFDEFAVSK	1xTMT6plex [K13]; 1xTMT6plex [N-Term]	6.05095e-08	0	2	Q9Y613	FHOD1	FH1/FH2 domain-containing protein 1 OS=Homo sapiens OX=9606 GN=FHOD1 PE=1 SV=3	0	1883.07	118.2	105.3	101.8	87.4	96.4	91	2	3.72	0.0035	45.0761	99
AALLNQHYQVNFK	1xTMT6plex [K13]; 1xTMT6plex [N-Term]	6.295e-07	0	3	P07814	EPRS	Bifunctional glutamate/proline--tRNA ligase OS=Homo sapiens OX=9606 GN=EPRS PE=1 SV=5	0	2004.14	102.5	103.5	95.1	100.9	103.4	94.6	3	3.32	0.00222	27.4744	42
AAIISAEGDSK	1xTMT6plex [K11]; 1xTMT6plex [N-Term]	2.18131e-06	0	3	P35232	PHB	Prohibitin OS=Homo sapiens OX=9606 GN=PHB PE=1 SV=1	0	1519.87	92.3	96.6	95.4	99.5	120.8	95.4	2	2.26	0.00172	19.0825	66
AALLTER	1xTMT6plex [N-Term]	0.0139716	0.00116958	1	Q9Y5B9	SUPT16H	FACT complex subunit SPT16 OS=Homo sapiens OX=9606 GN=SUPT16H PE=1 SV=1	0	1002.61	98.9	102	102.1	93.7	99.4	103.9	2	3.51	0.00176	15.901	22
AALLTGR	1xTMT6plex [N-Term]	0.0177173	0.00152836	1	P34059	GALNS	N-acetylgalactosamine-6-sulfatase OS=Homo sapiens OX=9606 GN=GALNS PE=1 SV=1	0	930.593	95.2	90.3	91.9	112.6	100.8	109.3	2	2.22	0.00103	15.4973	9
AALLVPPR	1xTMT6plex [N-Term]	0.0226548	0.00179395	1	Q99959	PKP2	Plakophilin-2 OS=Homo sapiens OX=9606 GN=PKP2 PE=1 SV=2	0	1065.7							2	2.74	0.00146	20.8355	3
AALIYTCTVCR	2xCarbamidomethyl [C7; C10]; 1xTMT6plex [N-Term]	1.7975e-05	0	1	Q9Y5V0	ZNF706	Zinc finger protein 706 OS=Homo sapiens OX=9606 GN=ZNF706 PE=1 SV=1	0	1556.81	110.7	108.6	119.2	81.7	90.4	89.3	2	-0.45	-0.00035	24.6965	25
AALMESQGQQQEER	1xTMT6plex [N-Term]	1.18527e-07	0	1	Q14980	NUMA1	Nuclear mitotic apparatus protein 1 OS=Homo sapiens OX=9606 GN=NUMA1 PE=1 SV=2	0	1833.9	102.7	105.8	102.2	92.6	96.9	99.8	2	1.82	0.00167	13.5875	45
AALMFANAEEEFFYEK	1xTMT6plex [K16]; 1xTMT6plex [N-Term]	5.91492e-10	0	2	Q9P287	BCCIP	BRCA2 and CDKN1A-interacting protein OS=Homo sapiens OX=9606 GN=BCCIP PE=1 SV=1	0	2368.19	108.7	101.5	106.1	91.1	99.3	93.2	2	4.38	0.00518	52.0928	108
AALMFANAEEEFFYEK	1xOxidation [M4]; 1xTMT6plex [K16]; 1xTMT6plex [N-Term]	4.15316e-05	0	1	Q9P287	BCCIP	BRCA2 and CDKN1A-interacting protein OS=Homo sapiens OX=9606 GN=BCCIP PE=1 SV=1	0	2384.19							3	-1.31	-0.00104	48.0783	37
AALNALQPPEFR	1xTMT6plex [N-Term]	0.000108406	2.77511e-05	1	Q3ZAQ7	VMA21	Vacuolar ATPase assembly integral membrane protein VMA21 OS=Homo sapiens OX=9606 GN=VMA21 PE=1 SV=1	0	1555.88	103.2	99.4	101.9	97	98.1	100.4	3	3.63	0.00188	32.0338	21
AALPLTTSDTK	1xTMT6plex [K11]; 1xTMT6plex [N-Term]	1.58759e-05	0	2	Q7Z6Z7	HUWE1	E3 ubiquitin-protein ligase HUWE1 OS=Homo sapiens OX=9606 GN=HUWE1 PE=1 SV=3	0	1575.94	106.7	101	102.3	98	96.4	95.6	2	-0.44	-0.00034	22.2707	32
AALPTPALSPEDK	1xTMT6plex [K13]; 1xTMT6plex [N-Term]	2.95769e-05	0	2	Q9H3S7	PTPN23	Tyrosine-protein phosphatase non-receptor type 23 OS=Homo sapiens OX=9606 GN=PTPN23 PE=1 SV=1	0	1768.03	105.5	108.7	104.1	98.8	94.5	88.4	2	2.15	0.0019	26.9525	50
AALQALK	1xTMT6plex [K7]; 1xTMT6plex [N-Term]	0.0197335	0.00165905	1	Q9H444	CHMP4B	Charged multivesicular body protein 4b OS=Homo sapiens OX=9606 GN=CHMP4B PE=1 SV=1	0	1172.78							2	0.89	0.00052	21.0431	12
AAIQALR	1xTMT6plex [N-Term]	0.0148714	0.00126079	4	Q9BY43; P04114	CHMP4A; APOB	Charged multivesicular body protein 4a OS=Homo sapiens OX=9606 GN=CHMP4A PE=1 SV=3;Apolipoprotein B-100 OS=Homo sapiens OX=9606 GN=APOB PE=1 SV=2	0	971.62	102	100.7	104.5	97	99.2	96.6	2	2.75	0.00134	14.8533	26
AALQEEEQASK	1xTMT6plex [K11]; 1xTMT6plex [N-Term]	5.05121e-06	0	1	O00139	KIF2A	Kinesin-like protein KIF2A OS=Homo sapiens OX=9606 GN=KIF2A PE=1 SV=3	0	1661.91	98.1	98	100.2	101	102.6	100.2	2	2.51	0.00209	15.5678	57
AALQEELQLCK	1xCarbamidomethyl [C10]; 1xTMT6plex [K11]; 1xTMT6plex [N-Term]	6.65836e-06	0	2	P49327	FASN	Fatty acid synthase OS=Homo sapiens OX=9606 GN=FASN PE=1 SV=3	0	1761	100.8	112.6	106.6	90.9	97.7	91.5	2	2.78	0.00245	30.8613	55
AALQEGHQFLCSIEA	1xCarbamidomethyl [C11]; 1xTMT6plex [N-Term]	0.00124411	0.000132543	2	P50583	NUDT2	Bis(5'-nucleosyl)-tetraphosphatase [asymmetrical] OS=Homo sapiens OX=9606 GN=NUDT2 PE=1 SV=3	0	1902.96	85.9	92.3	90.4	110.9	109.9	110.6	3	4.45	0.00282	37.3423	23
AALQELLSK	1xTMT6plex [K9]; 1xTMT6plex [N-Term]	0.000116621	2.77511e-05	4	P62851	RPS25	40S ribosomal protein S25 OS=Homo sapiens OX=9606 GN=RPS25 PE=1 SV=1	0	1430.9	108.2	105.9	107.7	89.5	96.6	92.1	2	-0.03	-2e-05	37.0061	38
AALQLVVDPGDPR	1xTMT6plex [N-Term]	0.00323288	0.000252074	1	O96013	PAK4	Serine/threonine-protein kinase PAK 4 OS=Homo sapiens OX=9606 GN=PAK4 PE=1 SV=1	0	1579.9							2	6.51	0.00515	31.1077	48
AALQSQAEALR	1xTMT6plex [N-Term]	5.84126e-06	0	1	Q8WZA9	IRGQ	Immunity-related GTPase family Q protein OS=Homo sapiens OX=9606 GN=IRGQ PE=1 SV=1	0	1386.79	98.8	95.2	94.8	107	98	106.1	2	1.65	0.00114	17.5929	46
AALRPTDVVLEVGPGTGNMTVK	1xTMT6plex [K22]; 1xTMT6plex [N-Term]	5.52515e-05	1.80381e-05	1	Q9UNQ2	DIMT1	Probable dimethyladenosine transferase OS=Homo sapiens OX=9606 GN=DIMT1 PE=1 SV=1	0	2683.52	106.8	104.1	105.2	91.9	91.9	100.1	4	3.07	0.00206	33.1588	25
AALSAGK	1xTMT6plex [K7]; 1xTMT6plex [N-Term]	0.0120977	0.000999255	1	P42765	ACAA2	3-ketoacyl-CoA thiolase, mitochondrial OS=Homo sapiens OX=9606 GN=ACAA2 PE=1 SV=2	0	1075.69	98.7	96.6	98.4	103.4	105.3	97.6	2	1.35	0.00072	12.1546	27
AALSALESFLK	1xTMT6plex [K11]; 1xTMT6plex [N-Term]	3.38081e-06	0	2	P78527	PRKDC	DNA-dependent protein kinase catalytic subunit OS=Homo sapiens OX=9606 GN=PRKDC PE=1 SV=3	0	1607.98	109.5	121.4	105.9	86.8	89.9	86.5	2	0.12	0.0001	51.3316	57
AALSASEGEEVPQDK	1xTMT6plex [K15]; 1xTMT6plex [N-Term]	9.22781e-08	0	2	O95831	AIFM1	Apoptosis-inducing factor 1, mitochondrial OS=Homo sapiens OX=9606 GN=AIFM1 PE=1 SV=1	0	1989.05	100.1	98.6	99.8	99.4	103.2	98.8	2	1.62	0.00161	19.7984	68
AALSEEELEK	1xTMT6plex [K10]; 1xTMT6plex [N-Term]	5.49108e-05	1.80381e-05	1	Q04637	EIF4G1	Eukaryotic translation initiation factor 4 gamma 1 OS=Homo sapiens OX=9606 GN=EIF4G1 PE=1 SV=4	0	1576.88	104.6	100.9	103.2	99	96.6	95.7	2	7.31	0.00576	22.5795	42
AALSEEELEKK	2xTMT6plex [K10; K11]; 1xTMT6plex [N-Term]	6.15984e-06	0	4	Q04637	EIF4G1	Eukaryotic translation initiation factor 4 gamma 1 OS=Homo sapiens OX=9606 GN=EIF4G1 PE=1 SV=4	1	1934.14	102.3	101.7	101	97.9	100.5	96.6	2	0.99	0.00096	20.2935	57
AALSEEELERK	1xTMT6plex [K11]; 1xTMT6plex [N-Term]	0.000141443	2.77511e-05	1	O43432	EIF4G3	Eukaryotic translation initiation factor 4 gamma 3 OS=Homo sapiens OX=9606 GN=EIF4G3 PE=1 SV=2	1	1732.98							3	4.72	0.00272	18.3876	14
AALSGANVLTLIEK	1xTMT6plex [K14]; 1xTMT6plex [N-Term]	1.707e-05	0	1	Q07954	LRP1	Prolow-density lipoprotein receptor-related protein 1 OS=Homo sapiens OX=9606 GN=LRP1 PE=1 SV=2	0	1858.14	91.6	87.8	85.9	119.4	105.9	109.3	3	2.21	0.00137	44.7374	25
AALSLPAK	1xTMT6plex [K8]; 1xTMT6plex [N-Term]	0.00265726	0.000212306	2	Q14978	NOLC1	Nucleolar and coiled-body phosphoprotein 1 OS=Homo sapiens OX=9606 GN=NOLC1 PE=1 SV=2	0	1228.8	110.1	105.5	115.8	87.1	93.9	87.6	2	2.96	0.00182	23.0129	46
AALTAEHFAALQSLLK	1xAcetyl [N-Term]; 1xTMT6plex [K16]; 1xTMT6plex [N-Term]	0.00447819	0.000335057	1	Q9P000	COMMD9	COMM domain-containing protein 9 OS=Homo sapiens OX=9606 GN=COMMD9 PE=1 SV=2	0	2184.28	101.8	105.4	95.5	101.3	98.6	97.4	3	-104913	-76.3863	50.5133	41
AALTGLLHR	1xTMT6plex [N-Term]	9.73958e-05	2.77511e-05	1	P55084	HADHB	Trifunctional enzyme subunit beta, mitochondrial OS=Homo sapiens OX=9606 GN=HADHB PE=1 SV=3	0	1180.74	93.2	105	100.8	102.2	104.1	94.7	3	1.71	0.00067	20.8482	62
AALTSAR	1xTMT6plex [N-Term]	0.0156404	0.00136151	2	O00231	PSMD11	26S proteasome non-ATPase regulatory subunit 11 OS=Homo sapiens OX=9606 GN=PSMD11 PE=1 SV=3	0	918.557	99.4	95.8	99.9	102.8	101.8	100.2	2	2.06	0.00094	9.4606	28
AALTTLFK	1xAcetyl [N-Term]; 1xTMT6plex [K8]; 1xTMT6plex [N-Term]	0.0228794	0.00179395	2	Q96KP4	CNDP2	Cytosolic non-specific dipeptidase OS=Homo sapiens OX=9606 GN=CNDP2 PE=1 SV=2	0	1364.86	98.1	117.8	113.2	84.8	86.6	99.5	2	-167902	-114.581	48.2286	39
AAITTLK	1xTMT6plex [K7]; 1xTMT6plex [N-Term]	0.0134615	0.00112615	1	Q9UNX4	WDR3	WD repeat-containing protein 3 OS=Homo sapiens OX=9606 GN=WDR3 PE=1 SV=1	0	1175.78	109.6	102.1	105.3	93.5	94.2	95.4	2	2.83	0.00167	19.549	26
AALVDLEPGTMDSVR	1xTMT6plex [N-Term]	1.06851e-07	0	3	Q9BUF5	TUBB6	Tubulin beta-6 chain OS=Homo sapiens OX=9606 GN=TUBB6 PE=1 SV=1	0	1802.95	93.4	96.4	93	109.3	105.6	102.3	2	1.75	0.00158	33.3412	80
AALVDLEPGTMDSVR	1xOxidation [M11]; 1xTMT6plex [N-Term]	0.0275279	0.00195448	1	Q9BUF5	TUBB6	Tubulin beta-6 chain OS=Homo sapiens OX=9606 GN=TUBB6 PE=1 SV=1	0	1818.95	91.9	95.8	106.1	92.5	103.1	110.6	2	4.94	0.00449	27.974	6
AAIVFTDGR	1xTMT6plex [N-Term]	0.0303268	0.0020481	1	O00339	MATN2	Matrilin-2 OS=Homo sapiens OX=9606 GN=MATN2 PE=1 SV=4	0	1178.67							2	3.26	0.00192	21.826	19
AAIVHNVDSDDLISMGSNDIEVLK	1xTMT6plex [K24]; 1xTMT6plex [N-Term]	5.05121e-06	0	1	O43567	RNF13	E3 ubiquitin-protein ligase RNF13 OS=Homo sapiens OX=9606 GN=RNF13 PE=1 SV=1	0	3013.59	100.1	105.1	103	95.3	96.1	100.5	3	2.82	0.00284	41.7076	12
AALVLEDGSVLR	1xAcetyl [N-Term]; 1xTMT6plex [N-Term]	8.24099e-05	2.77511e-05	4	P27708	CAD	CAD protein OS=Homo sapiens OX=9606 GN=CAD PE=1 SV=3	0	1513.88							2	-151371	-114.579	45.2413	60
AAIVYHTK	1xTMT6plex [K8]; 1xTMT6plex [N-Term]	0.000555393	3.92285e-05	1	Q7Z417	NUFIP2	Nuclear fragile X mental retardation-interacting protein 2 OS=Homo sapiens OX=9606 GN=NUFIP2 PE=1 SV=1	0	1360.84	100	97.7	107.9	93	95.3	106	2	-0.57	-0.00039	12.4398	40
AAIYGGVEGGGTR	1xAcetyl [N-Term]; 1xTMT6plex [N-Term]	0.000154167	2.77511e-05	1	Q9UJ70	NAGK	N-acetyl-D-glucosamine kinase OS=Homo sapiens OX=9606 GN=NAGK PE=1 SV=4	0	1478.78							2	-154966	-114.58	23.1924	38
AALYLECSAK	1xCarbamidomethyl [C7]; 1xTMT6plex [K10]; 1xTMT6plex [N-Term]	2.43501e-05	0	1	Q9HBH0	RHOF	Rho-related GTP-binding protein RhoF OS=Homo sapiens OX=9606 GN=RHOF PE=1 SV=1	0	1583.89	95.2	93	89.9	111.5	108.9	101.4	2	4.41	0.00349	25.3216	43
AAMALEK	1xTMT6plex [K7]; 1xTMT6plex [N-Term]	0.0116591	0.000981532	2	P02792	FTL	Ferritin light chain OS=Homo sapiens OX=9606 GN=FTL PE=1 SV=2	0	1191.72	87.7	84.2	91.5	131.5	101.2	104	2	7.02	0.00418	18.92	21
AAMDAVCAK	1xCarbamidomethyl [C7]; 1xTMT6plex [K9]; 1xTMT6plex [N-Term]	0.000169671	2.77511e-05	1	Q86UY6	NAA40	N-alpha-acetyltransferase 40 OS=Homo sapiens OX=9606 GN=NAA40 PE=1 SV=1	0	1394.75	102.8	99.5	102.3	98.6	97.3	99.5	2	1.38	0.00096	18.1482	38
AAMEALVVEVTK	1xTMT6plex [K12]; 1xTMT6plex [N-Term]	1.47319e-06	0	5	Q08211	DHX9	ATP-dependent RNA helicase A OS=Homo sapiens OX=9606 GN=DHX9 PE=1 SV=4	0	1719.01	105.8	105.9	100.6	94.7	97.1	95.9	2	3.03	0.0026	42.6184	66
AAMEPIVISAK	1xTMT6plex [K11]; 1xTMT6plex [N-Term]	8.17118e-06	0	2	Q9Y490	TLN1	Talin-1 OS=Homo sapiens OX=9606 GN=TLN1 PE=1 SV=3	0	1587.95	97.7	92.9	90.9	111.6	105.6	101.3	2	3.83	0.00304	28.6324	59
AAMEPIVISAK	1xOxidation [M3]; 1xTMT6plex [K11]; 1xTMT6plex [N-Term]	0.000996583	0.000123391	1	Q9Y490	TLN1	Talin-1 OS=Homo sapiens OX=9606 GN=TLN1 PE=1 SV=3	0	1603.95	94.8	95.1	90	108.6	107	104.3	2	3	0.00241	22.4739	39
AAMGPGISR	1xTMT6plex [N-Term]	0.00778325	0.000562563	1	Q96G03	PGM2	Phosphoglucomutase-2 OS=Homo sapiens OX=9606 GN=PGM2 PE=1 SV=4	0	1088.61	104.4	86.7	91	99.5	103.3	115.1	2	2.3	0.00125	12.2615	29
AAMIVNQLSK	1xTMT6plex [K10]; 1xTMT6plex [N-Term]	2.50165e-05	0	1	P14923	JUP	Junction plakoglobin OS=Homo sapiens OX=9606 GN=JUP PE=1 SV=3	0	1532.92	93.9	97.2	86.6	110.9	103.3	108.1	2	2.58	0.00198	28.7163	56
AAMIWIVGEYAER	1xTMT6plex [N-Term]	3.26076e-07	0	4	P63010; Q10567	AP2B1; AP1B1	AP-2 complex subunit beta OS=Homo sapiens OX=9606 GN=AP2B1 PE=1 SV=1;AP-1 complex subunit beta-1 OS=Homo sapiens OX=9606 GN=AP1B1 PE=1 SV=2	0	1737.92	94.6	99.8	96.5	107.2	98.1	103.9	2	3.69	0.0032	46.1909	51
AAMMNLLR	1xTMT6plex [N-Term]	0.142325	0.00513533	1	O14920	IKBKB	Inhibitor of nuclear factor kappa-B kinase subunit beta OS=Homo sapiens OX=9606 GN=IKBKB PE=1 SV=1	0	1148.65	93.2	105.6	97.6	89.6	107.5	106.6	2	4.55	0.00262	29.6019	3
AAMTSLMDLTLLLAR	1xTMT6plex [N-Term]	2.18463e-05	0	1	Q9BTW9	TBCD	Tubulin-specific chaperone D OS=Homo sapiens OX=9606 GN=TBCD PE=1 SV=2	0	1849.05	69.8	112.8	136.7	76.4	104.7	99.7	3	3.25	0.002	54.6606	49
AANAAENDFSVSQAEMSSR	1xTMT6plex [N-Term]	6.82461e-10	0	2	Q8NE71	ABCF1	ATP-binding cassette sub-family F member 1 OS=Homo sapiens OX=9606 GN=ABCF1 PE=1 SV=2	0	2214.03	108.4	97.1	105.7	99.9	95.5	93.5	2	2.27	0.00252	23.9891	108
AANAITK	1xTMT6plex [K7]; 1xTMT6plex [N-Term]	0.0159074	0.00139738	2	Q9NYL9	TMOD3	Tropomodulin-3 OS=Homo sapiens OX=9606 GN=TMOD3 PE=1 SV=1	0	1146.72	92.3	97.1	97.9	101.4	106.1	105.2	2	2.54	0.00145	12.6077	19
AANATTNPSQLLPLELVDK	1xAcetyl [N-Term]; 1xTMT6plex [K19]; 1xTMT6plex [N-Term]	0.0034568	0.000252074	2	Q9Y4Y9	LSM5	U6 snRNA-associated Sm-like protein LSm5 OS=Homo sapiens OX=9606 GN=LSM5 PE=1 SV=3	0	2495.41	93.7	99.2	97.8	104.1	98.4	106.8	3	-91829.6	-76.3842	51.6994	63
AANDAGYFNDEMAPIEVK	1xTMT6plex [K18]; 1xTMT6plex [N-Term]	2.89784e-07	0	2	P42765	ACAA2	3-ketoacyl-CoA thiolase, mitochondrial OS=Homo sapiens OX=9606 GN=ACAA2 PE=1 SV=2	0	2413.21	98.1	96.9	91.3	105.6	106.2	101.9	3	2.15	0.00173	36.0335	35
AANFENHSGK	1xTMT6plex [K10]; 1xTMT6plex [N-Term]	4.41181e-05	1.80381e-05	2	P18206	VCL	Vinculin OS=Homo sapiens OX=9606 GN=VCL PE=1 SV=4	0	1532.82	106.4	108.6	104.7	95.4	95.5	89.4	2	2.97	0.00227	10.292	43
AANGVVLATEK	1xTMT6plex [K11]; 1xTMT6plex [N-Term]	4.90986e-06	0	1	P25787	PSMA2	Proteasome subunit alpha type-2 OS=Homo sapiens OX=9606 GN=PSMA2 PE=1 SV=2	0	1530.93	97.5	87.7	90.4	114.1	114.5	95.7	2	0.89	0.00068	19.9816	63
AANLEMFK	1xTMT6plex [K8]; 1xTMT6plex [N-Term]	0.00147922	0.000153798	1	Q8WXI9	GATAD2B	Transcriptional repressor p66-beta OS=Homo sapiens OX=9606 GN=GATAD2B PE=1 SV=1	0	1381.79							2	3.57	0.00247	29.4977	27
AANLLLGYK	1xTMT6plex [K9]; 1xTMT6plex [N-Term]	0.000523221	3.92285e-05	1	Q86Y07	VRK2	Serine/threonine-protein kinase VRK2 OS=Homo sapiens OX=9606 GN=VRK2 PE=1 SV=3	0	1420.89							2	9.24	0.00656	33.151	23
AANILVGENLVCK	1xCarbamidomethyl [C12]; 1xTMT6plex [K13]; 1xTMT6plex [N-Term]	6.05178e-06	0	2	P07947; P12931	YES1; SRC	Tyrosine-protein kinase Yes OS=Homo sapiens OX=9606 GN=YES1 PE=1 SV=3;Proto-oncogene tyrosine-protein kinase Src OS=Homo sapiens OX=9606 GN=SRC PE=1 SV=3	0	1859.08	101.4	101.9	95.8	102.4	101.4	97.1	3	3.13	0.00194	33.952	23
AANMLQQSGSK	1xTMT6plex [K11]; 1xTMT6plex [N-Term]	4.98004e-06	0	1	P46063	RECQL	ATP-dependent DNA helicase Q1 OS=Homo sapiens OX=9606 GN=RECQL PE=1 SV=3	0	1592.88	98.3	95.2	97.1	105.5	102.3	101.7	2	0.34	0.00027	17.0555	39
AANPFQQK	1xTMT6plex [K8]; 1xTMT6plex [N-Term]	0.00343907	0.000252074	1	Q9C0H2	TTYH3	Protein tweety homolog 3 OS=Homo sapiens OX=9606 GN=TTYH3 PE=1 SV=3	0	1361.79	96.3	93.9	106.2	100.9	95.1	107.6	2	2.84	0.00193	18.477	21
AANPGCSLEDFVR	1xCarbamidomethyl [C6]; 1xTMT6plex [N-Term]	4.1731e-07	0	1	Q15042	RAB3GAP1	Rab3 GTPase-activating protein catalytic subunit OS=Homo sapiens OX=9606 GN=RAB3GAP1 PE=1 SV=3	0	1664.83	95.3	98	99.4	105	101.3	101	2	1.6	0.00133	29.1534	55
AANPVDFLSK	1xTMT6plex [K10]; 1xTMT6plex [N-Term]	4.30127e-05	1.80381e-05	2	Q8IY81	FTSJ3	pre-rRNA 2'-O-ribose RNA methyltransferase FTSJ3 OS=Homo sapiens OX=9606 GN=FTSJ3 PE=1 SV=2	0	1519.89	107.5	96.8	109.7	93.9	91.3	100.8	2	0.82	0.00062	32.8698	36
AANSLEAFIFETQDK	1xTMT6plex [K15]; 1xTMT6plex [N-Term]	6.11623e-08	0	4	Q9Y4L1	HYOU1	Hypoxia up-regulated protein 1 OS=Homo sapiens OX=9606 GN=HYOU1 PE=1 SV=1	0	2142.15	97.6	91.8	94.9	107.3	107.2	101.2	2	7.38	0.0079	46.8302	77
AANTATEEK	1xTMT6plex [K9]; 1xTMT6plex [N-Term]	0.000157577	2.77511e-05	1	Q8WYP5	AHCTF1	Protein ELYS OS=Homo sapiens OX=9606 GN=AHCTF1 PE=1 SV=3	0	1392.77	112.2	102.4	110.6	89.4	88	97.5	2	1.06	0.00074	9.3396	26
AANVLLSEQGDVK	1xTMT6plex [K13]; 1xTMT6plex [N-Term]	2.80607e-07	0	1	O00506; Q9P289	STK25; STK26	Serine/threonine-protein kinase 25 OS=Homo sapiens OX=9606 GN=STK25 PE=1 SV=1;Serine/threonine-protein kinase 26 OS=Homo sapiens OX=9606 GN=STK26 PE=1 SV=2	0	1802.04	106.1	92.5	102	98.3	102.4	98.7	2	2.92	0.00264	26.1611	63
AANVLVSESLMCK	1xCarbamidomethyl [C12]; 1xTMT6plex [K13]; 1xTMT6plex [N-Term]	3.64297e-07	0	1	P07948	LYN	Tyrosine-protein kinase Lyn OS=Homo sapiens OX=9606 GN=LYN PE=1 SV=3	0	1880.04	96.8	93	106	106.2	97.2	100.6	2	2.89	0.00272	34.3803	59
AANVVASTK	1xTMT6plex [K9]; 1xTMT6plex [N-Term]	7.77013e-05	2.77511e-05	1	O75146	HIP1R	Huntingtin-interacting protein 1-related protein OS=Homo sapiens OX=9606 GN=HIP1R PE=1 SV=2	0	1318.81	97.8	97.8	93.5	101	105.2	104.7	2	3.72	0.00245	13.6789	60
AANWYER	1xTMT6plex [N-Term]	0.0157066	0.00136151	1	O75489	NDUFS3	NADH dehydrogenase [ubiquinone] iron-sulfur protein 3, mitochondrial OS=Homo sapiens OX=9606 GN=NDUFS3 PE=1 SV=1	0	1138.58	100	101.7	102.4	104.6	102	89.1	2	1.93	0.0011	16.5727	11
AANYSSTSTR	1xTMT6plex [N-Term]	5.75139e-05	1.80381e-05	1	Q9BTV4	TMEM43	Transmembrane protein 43 OS=Homo sapiens OX=9606 GN=TMEM43 PE=1 SV=1	0	1286.65	97	99.7	89	106.1	106.5	101.7	2	0.8	0.00051	8.3017	42
AAPAEPDFIFR	1xTMT6plex [N-Term]	0.160518	0.00558231	1	Q8NCN4	RNF169	E3 ubiquitin-protein ligase RNF169 OS=Homo sapiens OX=9606 GN=RNF169 PE=1 SV=2	0	1462.79	99.3	104.4	102.5	98.5	93.9	101.5	2	5.13	0.00375	31.7951	6
AAPAPGK	1xTMT6plex [K7]; 1xTMT6plex [N-Term]	0.104991	0.00437844	1	Q13428	TCOF1	Treacle protein OS=Homo sapiens OX=9606 GN=TCOF1 PE=1 SV=3	0	1069.68	99.5	95.7	99.9	103.3	102.7	99	2	2.44	0.00131	9.5149	20
AAPAPGLISVFSSSQELGAALAQLVAQR	1xAcetyl [N-Term]; 1xTMT6plex [N-Term]	2.1772e-05	0	1	O95336	PGLS	6-phosphogluconolactonase OS=Homo sapiens OX=9606 GN=PGLS PE=1 SV=2	0	3023.67							3	-75783	-76.381	55.717	68
AAPASTK	1xTMT6plex [K7]; 1xTMT6plex [N-Term]	0.0122474	0.0010161	1	Q14980	NUMA1	Nuclear mitotic apparatus protein 1 OS=Homo sapiens OX=9606 GN=NUMA1 PE=1 SV=2	0	1103.68	99.7	104.7	101.9	95.5	96.6	101.7	2	2.27	0.00125	8.4937	29
AAPAVQTK	1xTMT6plex [K8]; 1xTMT6plex [N-Term]	0.00102021	0.000123391	1	P55084	HADHB	Trifunctional enzyme subunit beta, mitochondrial OS=Homo sapiens OX=9606 GN=HADHB PE=1 SV=3	0	1243.78	101.2	106.3	93.9	100.2	100	98.3	2	1.14	0.00071	11.1319	36
AAPCEGQAFAVGVEK	1xAcetyl [N-Term]; 1xCarbamidomethyl [C4]; 1xTMT6plex [K15]; 1xTMT6plex [N-Term]	9.22605e-05	2.77511e-05	1	Q86WB0	ZC3HC1	Nuclear-interacting partner of ALK OS=Homo sapiens OX=9606 GN=ZC3HC1 PE=1 SV=1	0	2034.07	100.6	100.2	97.1	97.3	103.1	101.8	2	-112660	-114.58	32.474	46
AAPCIYWLPLTDSQIVQK	1xCarbamidomethyl [C4]; 1xTMT6plex [K18]; 1xTMT6plex [N-Term]	3.19188e-05	0	2	Q9UKV3	ACIN1	Apoptotic chromatin condensation inducer in the nucleus OS=Homo sapiens OX=9606 GN=ACIN1 PE=1 SV=2	0	2561.42	107.5	98.6	103.5	97	101.2	92.3	4	1.86	0.00119	48.8861	44
AAPDITGHK	1xTMT6plex [K9]; 1xTMT6plex [N-Term]	0.000506724	3.92285e-05	2	Q9Y639	NPTN	Neuroplastin OS=Homo sapiens OX=9606 GN=NPTN PE=1 SV=2	0	1367.8	92.6	105.7	92.3	104.4	104.1	100.9	3	0.92	0.00042	12.0735	34
AAPEASGTPSSDAVSR	1xTMT6plex [N-Term]	4.29021e-06	0	1	P31146	CORO1A	Coronin-1A OS=Homo sapiens OX=9606 GN=CORO1A PE=1 SV=4	0	1731.87	89.7	90.2	96.2	100.4	104.8	118.6	2	1.94	0.00168	11.0994	61
AAPEASSPPASPLQHLLPGK	1xTMT6plex [K20]; 1xTMT6plex [N-Term]	0.00628174	0.000455509	1	Q96TA1	NIBAN2	Protein Niban 2 OS=Homo sapiens OX=9606 GN=NIBAN2 PE=1 SV=3	0	2426.38							4	3.22	0.00195	29.7237	5
AAPEEFRK	1xTMT6plex [K8]; 1xTMT6plex [N-Term]	0.0404105	0.00245057	1	P78318	IGBP1	Immunoglobulin-binding protein 1 OS=Homo sapiens OX=9606 GN=IGBP1 PE=1 SV=1	1	1405.82	98.9	91.3	99.2	106.8	98.3	105.4	3	2.5	0.00117	13.0987	4
AAPEEPQQRPPEAVAAAPAGTTSSR	1xTMT6plex [N-Term]	1.15597e-07	0	1	Q96JP5	ZFP91	E3 ubiquitin-protein ligase ZFP91 OS=Homo sapiens OX=9606 GN=ZFP91 PE=1 SV=1	0	2718.4	107.9	103.4	98.5	91.2	99.4	99.5	3	4.63	0.0042	13.6597	42
AAPEINNLIEEATEFIK	1xTMT6plex [K17]; 1xTMT6plex [N-Term]	4.78941e-06	0	1	Q8IVP5	FUNDC1	FUN14 domain-containing protein 1 OS=Homo sapiens OX=9606 GN=FUNDC1 PE=1 SV=1	0	2360.31	99.5	92.4	96	102.2	104.6	105.3	3	9.29	0.00731	54.1928	52
AAPEMVSLLK	1xTMT6plex [K10]; 1xTMT6plex [N-Term]	3.12923e-05	0	1	Q92947	GCDH	Glutaryl-CoA dehydrogenase, mitochondrial OS=Homo sapiens OX=9606 GN=GCDH PE=1 SV=1	0	1516.92	105.4	103.2	102.3	96.1	96.5	96.5	2	-1.06	-0.00081	34.3798	39
AAPFNNWMEGAMEDLQDMFIVHSIEEIQSLITAHEQFK	1xTMT6plex [K38]; 1xTMT6plex [N-Term]	3.13733e-06	0	1	P35609	ACTN2	Alpha-actinin-2 OS=Homo sapiens OX=9606 GN=ACTN2 PE=1 SV=1	0	4878.4	101.4	99.8	91.7	100.5	103	103.6	5	6.03	0.00588	53.0183	21
AAPFSLEYR	1xTMT6plex [N-Term]	0.000436195	3.92285e-05	2	Q15181	PPA1	Inorganic pyrophosphatase OS=Homo sapiens OX=9606 GN=PPA1 PE=1 SV=2	0	1282.7	100	95.3	96	107.5	100.4	100.8	2	2.06	0.00132	26.7566	19
AAPGAEFAPNK	1xTMT6plex [K11]; 1xTMT6plex [N-Term]	9.24249e-06	0	2	Q15233	NONO	Non-POU domain-containing octamer-binding protein OS=Homo sapiens OX=9606 GN=NONO PE=1 SV=4	0	1530.87	103.1	97	102	97.3	99.4	101.3	2	2.18	0.00167	18.7747	47
AAPGAEFAPNKR	1xTMT6plex [K11]; 1xTMT6plex [N-Term]	4.72862e-05	1.80381e-05	4	Q15233	NONO	Non-POU domain-containing octamer-binding protein OS=Homo sapiens OX=9606 GN=NONO PE=1 SV=4	1	1686.97	105.5	104.5	101.2	94.3	96.8	97.8	2	1.45	0.00122	14.2685	29
AAPGPALCLFDVDGTLTAPR	1xAcetyl [N-Term]; 1xCarbamidomethyl [C8]; 1xTMT6plex [N-Term]	3.73489e-06	0	3	O15305	PMM2	Phosphomannomutase 2 OS=Homo sapiens OX=9606 GN=PMM2 PE=1 SV=1	0	2313.21							2	-99063.3	-114.577	52.2383	67
AAPGPGPSTFSFVPPSK	1xTMT6plex [K17]; 1xTMT6plex [N-Term]	0.00413257	0.000304142	1	P35658	NUP214	Nuclear pore complex protein Nup214 OS=Homo sapiens OX=9606 GN=NUP214 PE=1 SV=2	0	2102.17	104.6	106.2	95.4	100.8	100.5	92.6	2	-0.18	-0.00019	32.8861	21
AAPGYHMAK	1xTMT6plex [K9]; 1xTMT6plex [N-Term]	0.000167159	2.77511e-05	2	P11216; P06737; P11217	PYGB; PYGL; PYGM	Glycogen phosphorylase, brain form OS=Homo sapiens OX=9606 GN=PYGB PE=1 SV=5;Glycogen phosphorylase, liver form OS=Homo sapiens OX=9606 GN=PYGL PE=1 SV=4;Glycogen phosphorylase, muscle form OS=Homo sapiens OX=9606 GN=PYGM PE=1 SV=6	0	1403.79							2	0.49	0.00034	11.7309	23
AAPLVTSGK	1xTMT6plex [K9]; 1xTMT6plex [N-Term]	0.000208832	2.77511e-05	1	Q5T6F2	UBAP2	Ubiquitin-associated protein 2 OS=Homo sapiens OX=9606 GN=UBAP2 PE=1 SV=1	0	1301.82							2	2.03	0.00132	16.0873	38
AAPLWDSK	1xTMT6plex [K8]; 1xTMT6plex [N-Term]	0.0032664	0.000252074	1	P54619	PRKAG1	5'-AMP-activated protein kinase subunit gamma-1 OS=Homo sapiens OX=9606 GN=PRKAG1 PE=1 SV=1	0	1345.79	98	95.9	99.3	105	100.6	101.3	2	4.27	0.00287	25.2277	19
AAPLWESK	1xTMT6plex [K8]; 1xTMT6plex [N-Term]	0.00205955	0.000201691	1	Q9UGJ0	PRKAG2	5'-AMP-activated protein kinase subunit gamma-2 OS=Homo sapiens OX=9606 GN=PRKAG2 PE=1 SV=1	0	1359.8							2	0.43	0.00029	25.0086	12
AAPMTPAARPEDYEAALNAALADVPELAR	1xAcetyl [N-Term]; 1xTMT6plex [N-Term]	2.33023e-05	0	3	Q04446	GBE1	1,4-alpha-glucan-branching enzyme OS=Homo sapiens OX=9606 GN=GBE1 PE=1 SV=3	0	3265.67							2	-70168.2	-114.573	53.0293	69
AAPMTPAARPEDYEAALNAALADVPELAR	1xAcetyl [N-Term]; 1xOxidation [M4]; 1xTMT6plex [N-Term]	3.79566e-05	0	1	Q04446	GBE1	1,4-alpha-glucan-branching enzyme OS=Homo sapiens OX=9606 GN=GBE1 PE=1 SV=3	0	3281.67							3	-69822.7	-76.3783	53.0862	54
AAPPGEYFSVGSQVSCR	1xAcetyl [N-Term]; 1xCarbamidomethyl [C16]; 1xTMT6plex [N-Term]	0.000286403	2.77511e-05	2	Q3MHD2	LSM12	Protein LSM12 homolog OS=Homo sapiens OX=9606 GN=LSM12 PE=1 SV=2	0	2083.01							2	-110009	-114.575	33.4434	34
AAPPQIPDTR	1xTMT6plex [N-Term]	0.110672	0.00448832	1	Q9HAF1	MEAF6	Chromatin modification-related protein MEAF6 OS=Homo sapiens OX=9606 GN=MEAF6 PE=1 SV=1	0	1294.73	100.3	94.8	101.7	98.5	102	102.7	2	1.47	0.00095	15.3098	19
AAPQSPSVPK	1xTMT6plex [K10]; 1xTMT6plex [N-Term]	8.74463e-05	2.77511e-05	1	O75694	NUP155	Nuclear pore complex protein Nup155 OS=Homo sapiens OX=9606 GN=NUP155 PE=1 SV=1	0	1439.86	107.9	96.4	102.5	96.7	99.6	96.9	2	3.73	0.00268	13.8983	30
AAPSEVAAIAPGEGDGGGGGFGSWLDGR	1xAcetyl [N-Term]; 1xTMT6plex [N-Term]	2.75982e-06	0	1	Q96MW1	CCDC43	Coiled-coil domain-containing protein 43 OS=Homo sapiens OX=9606 GN=CCDC43 PE=1 SV=2	0	2829.36							3	-80992.8	-76.386	50.7532	83
AAPSGGVNCEEFAEFQELLK	1xAcetyl [N-Term]; 1xCarbamidomethyl [C9]; 1xTMT6plex [K20]; 1xTMT6plex [N-Term]	4.6403e-05	1.80381e-05	2	Q4VC31	CCDC58	Coiled-coil domain-containing protein 58 OS=Homo sapiens OX=9606 GN=CCDC58 PE=1 SV=1	0	2696.36	101.7	97.7	101.6	97	100.9	101.2	2	-84985.7	-114.576	53.0036	112
AAPSTAPAEATPPKPGEAEAPPK	2xTMT6plex [K14; K23]; 1xTMT6plex [N-Term]	6.73734e-07	0	2	O95817	BAG3	BAG family molecular chaperone regulator 3 OS=Homo sapiens OX=9606 GN=BAG3 PE=1 SV=3	0	2872.6	103.9	95.5	121.5	94.7	86.6	97.8	3	3.38	0.00323	17.8541	44
AAPTAASDQPDSAATTEK	1xTMT6plex [K18]; 1xTMT6plex [N-Term]	3.03839e-06	0	1	Q9BRP8	PYM1	Partner of Y14 and mago OS=Homo sapiens OX=9606 GN=PYM1 PE=1 SV=1	0	2190.13	93.8	89.4	92.3	110	109.3	105.2	3	2.52	0.00184	14.1649	45
AAPTSAPPSK	1xTMT6plex [K10]; 1xTMT6plex [N-Term]	0.000102885	2.77511e-05	2	Q13123	IK	Protein Red OS=Homo sapiens OX=9606 GN=IK PE=1 SV=3	0	1384.82	105.3	108.9	105.4	92.7	92.7	95	2	1.03	0.00071	11.1775	25
AAPVDLELKK	1xAcetyl [N-Term]; 2xTMT6plex [K9; K10]; 1xTMT6plex [N-Term]	0.0232225	0.00180127	1	O60925	PFDN1	Prefoldin subunit 1 OS=Homo sapiens OX=9606 GN=PFDN1 PE=1 SV=2	1	1813.14	100.3	95.3	100.6	99.7	103.4	100.7	2	-126387	-114.579	28.9348	29
AAPVGPVK	1xAcetyl [N-Term]; 1xTMT6plex [K8]; 1xTMT6plex [N-Term]	0.195525	0.00652479	1	Q9H5Z1	DHX35	Probable ATP-dependent RNA helicase DHX35 OS=Homo sapiens OX=9606 GN=DHX35 PE=1 SV=2	0	1238.79							2	-184988	-114.58	18.9812	16
AAPVLLR	1xTMT6plex [N-Term]	0.0178738	0.00152836	1	Q8N0U8	VKORC1L1	Vitamin K epoxide reductase complex subunit 1-like protein 1 OS=Homo sapiens OX=9606 GN=VKORC1L1 PE=1 SV=2	0	968.645	98	92.7	101.2	103.7	99.7	104.7	2	1.91	0.00092	17.9516	32
AAPVTGGMGAVLMR	1xTMT6plex [N-Term]	0.00016348	2.77511e-05	1	P18583	SON	Protein SON OS=Homo sapiens OX=9606 GN=SON PE=1 SV=4	0	1559.86	105.8	103.7	106.1	89.8	96.3	98.3	2	0.31	0.00024	28.0034	37
AAQAGVAVGDWVLSIDGENAGSLTHIEAQNK	1xTMT6plex [K31]; 1xTMT6plex [N-Term]	7.18501e-07	0	1	Q9NR12	PDLIM7	PDZ and LIM domain protein 7 OS=Homo sapiens OX=9606 GN=PDLIM7 PE=1 SV=1	0	3579.88	100.4	107.1	102.9	89.6	103.2	96.8	4	1.5	0.00135	46.9212	21
AAQALAK	1xTMT6plex [K7]; 1xTMT6plex [N-Term]	0.0161802	0.0014228	1	Q9H3U1	UNC45A	Protein unc-45 homolog A OS=Homo sapiens OX=9606 GN=UNC45A PE=1 SV=1	0	1130.73	93.4	97.1	101.2	102.6	108.1	97.6	2	2.39	0.00135	13.5754	22
AAQALALLR	1xAcetyl [N-Term]; 1xTMT6plex [N-Term]	0.000221692	2.77511e-05	2	Q16401	PSMD5	26S proteasome non-ATPase regulatory subunit 5 OS=Homo sapiens OX=9606 GN=PSMD5 PE=1 SV=3	0	1197.75							2	-191325	-114.58	43.8032	74
AAQAPSSFQLLYDLK	1xTMT6plex [K15]; 1xTMT6plex [N-Term]	0.00067101	7.57932e-05	1	P11586	MTHFD1	C-1-tetrahydrofolate synthase, cytoplasmic OS=Homo sapiens OX=9606 GN=MTHFD1 PE=1 SV=3	0	2110.19	101.2	101.4	98.6	98.1	97.8	103.1	3	1.42	0.001	44.723	34
AAQASDLEK	1xTMT6plex [K9]; 1xTMT6plex [N-Term]	0.00012268	2.77511e-05	2	P37837	TALDO1	Transaldolase OS=Homo sapiens OX=9606 GN=TALDO1 PE=1 SV=2	0	1390.79	98.7	111.7	107	97.5	95.2	90	3	3.89	0.0018	14.1572	35
AAQDFFSTCR	1xCarbamidomethyl [C9]; 1xTMT6plex [N-Term]	0.000151946	2.77511e-05	1	P06132	UROD	Uroporphyrinogen decarboxylase OS=Homo sapiens OX=9606 GN=UROD PE=1 SV=2	0	1431.69	90	101.7	106.4	93.2	101.7	107.1	2	3.21	0.0023	24.0925	22
AAQDLCEEALR	1xCarbamidomethyl [C6]; 1xTMT6plex [N-Term]	1.12486e-05	0	3	O94906	PRPF6	Pre-mRNA-processing factor 6 OS=Homo sapiens OX=9606 GN=PRPF6 PE=1 SV=1	0	1504.76	101.4	96.4	97.7	102.6	100	101.8	2	2.38	0.00179	20.9438	32
AAQDRDQIYR	1xTMT6plex [N-Term]	0.00243514	0.000201691	2	P62995	TRA2B	Transformer-2 protein homolog beta OS=Homo sapiens OX=9606 GN=TRA2B PE=1 SV=1	1	1464.78	102.1	94.5	109.8	106.5	92.4	94.7	2	0.85	0.00062	8.8322	14
AAQEELGK	1xTMT6plex [K8]; 1xTMT6plex [N-Term]	0.00459104	0.000366955	1	Q9UIM3	FKBPL	FK506-binding protein-like OS=Homo sapiens OX=9606 GN=FKBPL PE=1 SV=1	0	1303.76	71.7	138.5	177.1	83.6	56.3	72.8	2	5.95	0.00388	13.2618	12
AAQEEYVK	1xTMT6plex [K8]; 1xTMT6plex [N-Term]	0.00122647	0.000132543	2	P04075	ALDOA	Fructose-bisphosphate aldolase A OS=Homo sapiens OX=9606 GN=ALDOA PE=1 SV=2	0	1395.79	95.9	103.4	95.2	99.4	107.2	99.1	2	1.64	0.00115	13.2877	31
AAQEEYVKR	1xTMT6plex [K8]; 1xTMT6plex [N-Term]	0.000606181	5.20452e-05	3	P04075	ALDOA	Fructose-bisphosphate aldolase A OS=Homo sapiens OX=9606 GN=ALDOA PE=1 SV=2	1	1551.89	89.7	95.7	89.4	106.6	112.4	106.3	3	1.29	0.00067	10.1884	17
AAQGEPQVQFK	1xAcetyl [N-Term]; 1xTMT6plex [K11]; 1xTMT6plex [N-Term]	0.00447819	0.000335057	3	P62826	RAN	GTP-binding nuclear protein Ran OS=Homo sapiens OX=9606 GN=RAN PE=1 SV=3	0	1702.95	100.6	91.4	97.2	105.5	103	102.3	2	-134565	-114.579	25.7567	43
AAQGPPAPAVPPNTDVMACTQTALLQK	1xCarbamidomethyl [C19]; 1xTMT6plex [K27]; 1xTMT6plex [N-Term]	1.69527e-05	0	1	O60232	ZNRD2	Protein ZNRD2 OS=Homo sapiens OX=9606 GN=ZNRD2 PE=1 SV=1	0	3205.71	102.8	98.9	90.7	109.5	95.4	102.9	3	0.66	0.0007	37.1159	63
AAQGVGPGPGSAAPPGLEAAR	1xAcetyl [N-Term]; 1xTMT6plex [N-Term]	4.36709e-06	0	1	Q6NZ67	MZT2B	Mitotic-spindle organizing protein 2B OS=Homo sapiens OX=9606 GN=MZT2B PE=1 SV=1	0	2102.12							2	-109010	-114.576	25.4957	59
AAQLAIR	1xTMT6plex [N-Term]	0.013573	0.00113555	1	P62910	RPL32	60S ribosomal protein L32 OS=Homo sapiens OX=9606 GN=RPL32 PE=1 SV=2	0	971.62	109	103.7	98.9	98.9	95.3	94.3	2	2.25	0.00109	13.9919	32
AAQLATEIADIK	1xTMT6plex [K12]; 1xTMT6plex [N-Term]	1.57657e-06	0	2	Q15075	EEA1	Early endosome antigen 1 OS=Homo sapiens OX=9606 GN=EEA1 PE=1 SV=2	0	1702.02	97.8	101.3	98.2	103.5	101.5	97.7	2	1.05	0.00089	37.7017	48
AAQLCGAGMAAVVDK	1xCarbamidomethyl [C5]; 1xTMT6plex [K15]; 1xTMT6plex [N-Term]	2.85346e-09	0	2	P19367	HK1	Hexokinase-1 OS=Homo sapiens OX=9606 GN=HK1 PE=1 SV=3	0	1920.04	105.5	99.5	90.5	102.7	103.5	98.3	2	5.09	0.00489	29.3745	110
AAQLCGAGMAAVVDR	1xCarbamidomethyl [C5]; 1xTMT6plex [N-Term]	1.6353e-07	0	1	P52789	HK2	Hexokinase-2 OS=Homo sapiens OX=9606 GN=HK2 PE=1 SV=2	0	1718.89	129.9	110.9	117.7	81.8	75.5	84.1	2	5.5	0.00473	25.9436	40
AAQLEGER	1xTMT6plex [N-Term]	0.0232225	0.00180127	1	O75146	HIP1R	Huntingtin-interacting protein 1-related protein OS=Homo sapiens OX=9606 GN=HIP1R PE=1 SV=2	0	1102.61	95.2	120.1	106	92.4	88.9	97.4	2	1.65	0.00091	10.2481	14
AAQIFITELTLR	1xTMT6plex [N-Term]	0.000361729	3.92285e-05	1	Q13952	NFYC	Nuclear transcription factor Y subunit gamma OS=Homo sapiens OX=9606 GN=NFYC PE=1 SV=3	0	1604.96							3	4.34	0.00232	45.81	24
AAQLIGTCSQNVAAIQEQVLGLGALR	1xCarbamidomethyl [C8]; 1xTMT6plex [N-Term]	1.41974e-10	0	3	Q9NZL4	HSPBP1	Hsp70-binding protein 1 OS=Homo sapiens OX=9606 GN=HSPBP1 PE=1 SV=2	0	2910.6	102.4	102.7	101.6	86.9	90.4	116	4	9.29	0.00676	51.5675	101
AAQIPESDQIK	1xAcetyl [N-Term]; 1xTMT6plex [K11]; 1xTMT6plex [N-Term]	0.00181772	0.000185426	1	Q9Y5J7	TIMM9	Mitochondrial import inner membrane translocase subunit Tim9 OS=Homo sapiens OX=9606 GN=TIMM9 PE=1 SV=1	0	1699.96	100.8	100	101.2	96.2	99.4	102.5	2	-134801	-114.578	25.3486	48
AAQLQEALLHCGR	1xCarbamidomethyl [C11]; 1xTMT6plex [N-Term]	1.62804e-06	0	1	Q03001	DST	Dystonin OS=Homo sapiens OX=9606 GN=DST PE=1 SV=4	0	1695.92	94.1	96.5	95.4	106.5	97.7	109.8	3	4.02	0.00227	24.9778	47
AAQLQHSEK	1xTMT6plex [K9]; 1xTMT6plex [N-Term]	0.000121025	2.77511e-05	2	Q16204	CCDC6	Coiled-coil domain-containing protein 6 OS=Homo sapiens OX=9606 GN=CCDC6 PE=1 SV=2	0	1469.85	103.8	109.7	113.6	89.2	95.2	88.4	2	1.37	0.001	9.1002	39
AAQMHSGYQR	1xTMT6plex [N-Term]	7.17303e-05	2.77511e-05	1	Q96PK6	RBM14	RNA-binding protein 14 OS=Homo sapiens OX=9606 GN=RBM14 PE=1 SV=2	0	1377.69	102.3	100.7	108.7	94.2	97.2	96.8	2	1.16	0.0008	7.6704	31
AAQNISK	1xTMT6plex [K7]; 1xTMT6plex [N-Term]	0.0102988	0.000821723	1	Q99623	PHB2	Prohibitin-2 OS=Homo sapiens OX=9606 GN=PHB2 PE=1 SV=2	0	1189.73	95.6	107	102.1	97.3	102.3	95.7	2	1.66	0.00099	10.7262	28
AAQNSGEAEYIEK	1xTMT6plex [K13]; 1xTMT6plex [N-Term]	2.61241e-07	0	1	P07942	LAMB1	Laminin subunit beta-1 OS=Homo sapiens OX=9606 GN=LAMB1 PE=1 SV=2	0	1867.98	82.6	78.5	73.9	127	115	122.9	2	0.31	0.00029	18.0761	55
AAQPGSGK	1xTMT6plex [K8]; 1xTMT6plex [N-Term]	0.026115	0.00190178	1	P05455	SSB	Lupus La protein OS=Homo sapiens OX=9606 GN=SSB PE=1 SV=2	0	1173.7	106	105.5	107.8	91.9	100.2	88.6	2	1.83	0.00107	8.2747	18
AAQSANISVR	1xTMT6plex [N-Term]	0.000195368	2.77511e-05	1	P35914	HMGCL	Hydroxymethylglutaryl-CoA lyase, mitochondrial OS=Homo sapiens OX=9606 GN=HMGCL PE=1 SV=2	0	1245.71	106.3	110.9	97.3	93.7	87	104.8	2	5.17	0.00322	10.6629	28
AAQSLDEMSQTITDLLSEQK	1xTMT6plex [K20]; 1xTMT6plex [N-Term]	4.37008e-05	1.80381e-05	1	Q8TDY2	RB1CC1	RB1-inducible coiled-coil protein 1 OS=Homo sapiens OX=9606 GN=RB1CC1 PE=1 SV=3	0	2666.4							3	6.67	0.00593	53.5753	17
AAQSLLNK	1xTMT6plex [K8]; 1xTMT6plex [N-Term]	0.000771129	7.57932e-05	3	Q9UMR2; Q9NUU7	DDX19B; DDX19A	ATP-dependent RNA helicase DDX19B OS=Homo sapiens OX=9606 GN=DDX19B PE=1 SV=1;ATP-dependent RNA helicase DDX19A OS=Homo sapiens OX=9606 GN=DDX19A PE=1 SV=1	0	1302.81	104.9	103.8	99.2	93	99.9	99.1	2	2.58	0.00168	20.3221	48
AAQSTAMNR	1xTMT6plex [N-Term]	0.00276909	0.000222687	1	P46459	NSF	Vesicle-fusing ATPase OS=Homo sapiens OX=9606 GN=NSF PE=1 SV=3	0	1178.61	110.1	99.2	98.1	97.5	95.2	99.9	2	2.48	0.00146	8.0095	16
AAQTELGQQILADFEEAFPSQGTK	1xTMT6plex [K24]; 1xTMT6plex [N-Term]	4.02494e-08	0	1	Q5VIR6	VPS53	Vacuolar protein sorting-associated protein 53 homolog OS=Homo sapiens OX=9606 GN=VPS53 PE=1 SV=1	0	3037.59	94.4	91.3	97.8	103.2	96.1	117.1	4	1.78	0.00135	53.5317	72
AAQTTIETAIHSLIETLK	1xTMT6plex [K18]; 1xTMT6plex [N-Term]	7.84244e-05	2.77511e-05	1	O94915	FRYL	Protein furry homolog-like OS=Homo sapiens OX=9606 GN=FRYL PE=1 SV=2	0	2398.4	98.6	103.4	91.9	98.6	107.8	99.7	3	2.69	0.00215	53.3298	4
AAQVFYNNK	1xTMT6plex [K9]; 1xTMT6plex [N-Term]	0.297452	0.00880182	1	Q9BZC7	ABCA2	ATP-binding cassette sub-family A member 2 OS=Homo sapiens OX=9606 GN=ABCA2 PE=1 SV=4	0	1512.86	93.6	88.5	95	129.1	97.9	96	2	6.36	0.00481	24.6519	1
AAQVMGPPDR	1xTMT6plex [N-Term]	0.000951031	0.000111907	1	Q96I24	FUBP3	Far upstream element-binding protein 3 OS=Homo sapiens OX=9606 GN=FUBP3 PE=1 SV=2	0	1270.68	97.1	99.5	106.4	99	96.6	101.3	2	1.26	0.0008	13.0081	28
AAQYQVNQAAAAQAAATAAAMTQSAVK	1xTMT6plex [K27]; 1xTMT6plex [N-Term]	1.2724e-08	0	2	Q9NR56	MBNL1	Muscleblind-like protein 1 OS=Homo sapiens OX=9606 GN=MBNL1 PE=1 SV=2	0	3064.62	101.8	97.5	101.4	103.6	101.7	94	3	-3.51	-0.00359	42.0492	85
AASAAAAELQASGGPR	1xAcetyl [N-Term]; 1xTMT6plex [N-Term]	2.08285e-05	0	1	Q9HCN4	GPN1	GPN-loop GTPase 1 OS=Homo sapiens OX=9606 GN=GPN1 PE=1 SV=1	0	1698.9							2	-134887	-114.58	26.4892	66
AASAAAASAAAASAASGSPGPGEGSAGGEK	1xAcetyl [N-Term]; 1xTMT6plex [K30]; 1xTMT6plex [N-Term]	2.06769e-06	0	1	Q13263	TRIM28	Transcription intermediary factor 1-beta OS=Homo sapiens OX=9606 GN=TRIM28 PE=1 SV=5	0	2887.44	72	71.6	80.3	129.1	119.6	127.3	3	-79363.9	-76.3862	29.6394	76
AASAAAASAAAASAASGSPGPGEGSAGGEKR	1xAcetyl [N-Term]; 1xTMT6plex [K30]; 1xTMT6plex [N-Term]	8.6835e-08	0	1	Q13263	TRIM28	Transcription intermediary factor 1-beta OS=Homo sapiens OX=9606 GN=TRIM28 PE=1 SV=5	1	3043.54	115.4	91.6	100.8	102.4	89.8	100	3	-75292	-76.3849	24.3657	65
AASAAFQENVGR	1xTMT6plex [N-Term]	2.54267e-06	0	1	Q9BTW9	TBCD	Tubulin-specific chaperone D OS=Homo sapiens OX=9606 GN=TBCD PE=1 SV=2	0	1449.76	81.7	90.2	95.5	121.9	107.7	103	2	2.4	0.00174	15.6331	53
AASAATAAPTATPAAQESGTIPK	1xTMT6plex [K23]; 1xTMT6plex [N-Term]	3.06701e-08	0	2	O00116	AGPS	Alkyldihydroxyacetonephosphate synthase, peroxisomal OS=Homo sapiens OX=9606 GN=AGPS PE=1 SV=1	0	2541.39	90.1	89.9	97.4	112.7	102	107.9	3	3.28	0.00278	19.9574	77
AASADSTTEGTPADGFTVLSTK	1xTMT6plex [K22]; 1xTMT6plex [N-Term]	8.27852e-10	0	5	O75367	H2AFY	Core histone macro-H2A.1 OS=Homo sapiens OX=9606 GN=H2AFY PE=1 SV=4	0	2585.33	97.2	97	98.3	101.8	103.6	102.1	2	3.82	0.00493	31.6867	119
AASAFFTYVSLSQEGR	1xTMT6plex [N-Term]	1.5008e-07	0	2	O00154	ACOT7	Cytosolic acyl coenzyme A thioester hydrolase OS=Homo sapiens OX=9606 GN=ACOT7 PE=1 SV=3	0	1963.01	101.6	103.1	104.2	92.5	97.9	100.7	3	2.67	0.00174	43.2798	44
AASAGQEPLHNEELAGAGR	1xTMT6plex [N-Term]	1.43086e-09	0	1	Q96HY6	DDRGK1	DDRGK domain-containing protein 1 OS=Homo sapiens OX=9606 GN=DDRGK1 PE=1 SV=2	0	2107.07	99.5	87.8	95.4	100.2	105.7	111.4	3	1.92	0.00135	13.7946	76
AASAIYSGYIFDYDYYR	1xTMT6plex [N-Term]	2.0384e-06	0	2	Q9UKM9	RALY	RNA-binding protein Raly OS=Homo sapiens OX=9606 GN=RALY PE=1 SV=1	0	2267.09	103.2	103.1	105.2	101.1	93.1	94.2	3	3.35	0.00253	45.4402	40
AASAIYSGYIFDYDYYRDDFYDR	1xTMT6plex [N-Term]	1.94153e-07	0	1	Q9UKM9	RALY	RNA-binding protein Raly OS=Homo sapiens OX=9606 GN=RALY PE=1 SV=1	1	3078.4	94.4	99.2	107	104.8	103.1	91.6	3	3.45	0.00354	47.5382	31
AASAPYFEVLEK	1xTMT6plex [K12]; 1xTMT6plex [N-Term]	7.47309e-07	0	2	Q9BSJ2	TUBGCP2	Gamma-tubulin complex component 2 OS=Homo sapiens OX=9606 GN=TUBGCP2 PE=1 SV=2	0	1783	95	105.5	93.9	106.2	103.6	95.8	2	2.66	0.00238	36.7751	67
AASAYAVGDVK	1xTMT6plex [K11]; 1xTMT6plex [N-Term]	4.38263e-06	0	1	P13861	PRKAR2A	cAMP-dependent protein kinase type II-alpha regulatory subunit OS=Homo sapiens OX=9606 GN=PRKAR2A PE=1 SV=2	0	1509.87	90.6	95.1	93.1	105.8	110.7	104.7	2	0.09	7e-05	19.3573	64
AASCGEGK	1xCarbamidomethyl [C4]; 1xTMT6plex [K8]; 1xTMT6plex [N-Term]	0.0037908	0.000283562	1	Q6FI81	CIAPIN1	Anamorsin OS=Homo sapiens OX=9606 GN=CIAPIN1 PE=1 SV=2	0	1237.66	91.5	88.1	88.4	114.4	112.6	105	2	2.14	0.00133	8.1892	21
AASCVLLHTGQK	1xAcetyl [N-Term]; 1xCarbamidomethyl [C4]; 1xTMT6plex [K12]; 1xTMT6plex [N-Term]	0.00140255	0.000142151	1	P14550	AKR1A1	Aldo-keto reductase family 1 member A1 OS=Homo sapiens OX=9606 GN=AKR1A1 PE=1 SV=3	0	1785.01	99.7	102.9	106.2	94.6	99	97.6	2	-128377	-114.577	22.101	39
AASDDGSLK	1xTMT6plex [K9]; 1xTMT6plex [N-Term]	0.000643668	7.57932e-05	1	Q92614	MYO18A	Unconventional myosin-XVIIIa OS=Homo sapiens OX=9606 GN=MYO18A PE=1 SV=3	0	1321.74	106.4	101	105.4	86.3	95.3	105.6	2	7.58	0.00501	12.2858	18
AASDELSK	1xTMT6plex [K8]; 1xTMT6plex [N-Term]	0.000592367	5.20452e-05	2	P18206	VCL	Vinculin OS=Homo sapiens OX=9606 GN=VCL PE=1 SV=4	0	1278.73	102.6	105.9	102.5	97.7	98.2	93.2	2	0.07	4e-05	13.2221	46
AASDIAMTELPPTHPIR	1xTMT6plex [N-Term]	1.92081e-07	0	21	P62258	YWHAE	14-3-3 protein epsilon OS=Homo sapiens OX=9606 GN=YWHAE PE=1 SV=1	0	2049.1	101.9	103.8	101.4	96.8	97.2	99	3	2.64	0.00181	24.4378	53
AASDIWKPVLSIDTEPR	1xTMT6plex [K7]; 1xTMT6plex [N-Term]	2.7392e-05	0	1	Q96JM3	CHAMP1	Chromosome alignment-maintaining phosphoprotein 1 OS=Homo sapiens OX=9606 GN=CHAMP1 PE=1 SV=2	0	2356.33	103.1	98.3	101.1	98.4	95.7	103.4	3	0.86	0.00067	37.0871	12
AASGEAKPK	2xTMT6plex [K7; K9]; 1xTMT6plex [N-Term]	0.000238452	2.77511e-05	3	P10412; P16403	H1-4; H1-2	Histone H1.4 OS=Homo sapiens OX=9606 GN=H1-4 PE=1 SV=2;Histone H1.2 OS=Homo sapiens OX=9606 GN=H1-2 PE=1 SV=2	0	1545.96	126.4	140.1	123.1	65.4	78	67	2	1.55	0.0012	8.6556	32
AASGEIK	1xTMT6plex [K7]; 1xTMT6plex [N-Term]	0.00711386	0.000514297	1	Q13907	IDI1	Isopentenyl-diphosphate Delta-isomerase 1 OS=Homo sapiens OX=9606 GN=IDI1 PE=1 SV=2	0	1133.69	106.9	110	124.4	84.2	87.9	86.5	2	1.93	0.0011	11.1373	32
AASGESGTSGGGGSTEEAFMTFYSEVK	1xAcetyl [N-Term]; 1xTMT6plex [K27]; 1xTMT6plex [N-Term]	0.000332875	3.92285e-05	1	O75937	DNAJC8	DnaJ homolog subfamily C member 8 OS=Homo sapiens OX=9606 GN=DNAJC8 PE=1 SV=2	0	3144.47	98.9	103.7	108.2	99.9	95.7	93.6	3	-72877.8	-76.3874	52.0564	76
AASGYPVK	1xTMT6plex [K8]; 1xTMT6plex [N-Term]	0.00162281	0.000174676	1	P26640	VARS	Valine--tRNA ligase OS=Homo sapiens OX=9606 GN=VARS PE=1 SV=4	0	1250.75							2	2.35	0.00147	14.2013	28
AASHEQAAAALK	1xTMT6plex [K12]; 1xTMT6plex [N-Term]	6.03071e-07	0	2	Q12959	DLG1	Disks large homolog 1 OS=Homo sapiens OX=9606 GN=DLG1 PE=1 SV=2	0	1625.94	87.3	91.4	94.7	109.4	105.7	111.6	2	1.67	0.00135	10.9587	77
AASLEAVSYAIDTLK	1xTMT6plex [K15]; 1xTMT6plex [N-Term]	7.31379e-08	0	2	O96007	MOCS2	Molybdopterin synthase catalytic subunit OS=Homo sapiens OX=9606 GN=MOCS2 PE=1 SV=1	0	2010.15	98.1	101.5	94.9	102.7	100.5	102.3	2	4.89	0.00491	48.9876	80
AASLELSEVK	1xTMT6plex [K10]; 1xTMT6plex [N-Term]	2.19207e-05	0	1	Q08378	GOLGA3	Golgin subfamily A member 3 OS=Homo sapiens OX=9606 GN=GOLGA3 PE=1 SV=2	0	1504.9	97.1	94.2	99.1	110.2	97.4	102.1	2	1.09	0.00082	25.5199	63
AASLEYDYETIR	1xTMT6plex [N-Term]	9.70852e-06	0	2	Q96N66	MBOAT7	Lysophospholipid acyltransferase 7 OS=Homo sapiens OX=9606 GN=MBOAT7 PE=1 SV=2	0	1659.84	94	102.3	100.3	104.2	95.1	104.1	2	4.57	0.0038	26.2295	28
AASIFGGAKPVDTAAR	1xTMT6plex [K9]; 1xTMT6plex [N-Term]	2.11996e-06	0	2	P23588	EIF4B	Eukaryotic translation initiation factor 4B OS=Homo sapiens OX=9606 GN=EIF4B PE=1 SV=2	0	1990.15	106.1	101.5	104.2	96.8	96.3	95.1	2	1.36	0.00136	22.4374	57
AASLTEDRDR	1xTMT6plex [N-Term]	0.00670323	0.000505076	2	Q04637	EIF4G1	Eukaryotic translation initiation factor 4 gamma 1 OS=Homo sapiens OX=9606 GN=EIF4G1 PE=1 SV=4	1	1362.72	108.3	93.2	99.8	97.2	101.4	100	2	0.52	0.00036	8.9273	44
AASITSEVFNK	1xTMT6plex [K11]; 1xTMT6plex [N-Term]	7.91602e-06	0	1	Q9Y5B9	SUPT16H	FACT complex subunit SPT16 OS=Homo sapiens OX=9606 GN=SUPT16H PE=1 SV=1	0	1624.93							2	3.03	0.00246	29.4481	31
AASLVGK	1xAcetyl [N-Term]; 1xTMT6plex [K7]; 1xTMT6plex [N-Term]	0.151545	0.00537663	1	Q9BY32	ITPA	Inosine triphosphate pyrophosphatase OS=Homo sapiens OX=9606 GN=ITPA PE=1 SV=2	0	1145.73	96.8	105	100.1	95.7	102.1	100.3	2	-200013	-114.58	24.0339	17
AASIYSSWAEEQR	1xTMT6plex [N-Term]	6.85882e-07	0	1	Q92538	GBF1	Golgi-specific brefeldin A-resistance guanine nucleotide exchange factor 1 OS=Homo sapiens OX=9606 GN=GBF1 PE=1 SV=2	0	1726.86	98.4	90.9	96	105.7	109.2	99.8	2	7.78	0.00672	28.0122	40
AASNMALGK	1xOxidation [M5]; 1xTMT6plex [K9]; 1xTMT6plex [N-Term]	0.17897	0.00607939	1	P53041	PPP5C	Serine/threonine-protein phosphatase 5 OS=Homo sapiens OX=9606 GN=PPP5C PE=1 SV=1	0	1336.77	96.2	95.7	97.3	95.7	93.7	121.5	2	2.48	0.00166	12.1544	16
AASPSELTCPPGWEWEDDAWSYDINR	1xCarbamidomethyl [C9]; 1xTMT6plex [N-Term]	1.05614e-05	0	2	Q9NZM1	MYOF	Myoferlin OS=Homo sapiens OX=9606 GN=MYOF PE=1 SV=1	0	3281.47	111.7	111.3	99.1	95.7	97.3	85	3	3.66	0.004	47.9714	60
AASQGYTVAR	1xTMT6plex [N-Term]	6.09765e-05	1.80381e-05	1	Q9UBV2	SEL1L	Protein sel-1 homolog 1 OS=Homo sapiens OX=9606 GN=SEL1L PE=1 SV=3	0	1252.68	90.5	81.9	94.3	125.8	107.4	100	2	2.55	0.0016	10.307	34
AASQILILK	1xTMT6plex [K9]; 1xTMT6plex [N-Term]	0.000127821	2.77511e-05	1	O15439	ABCC4	Multidrug resistance-associated protein 4 OS=Homo sapiens OX=9606 GN=ABCC4 PE=1 SV=3	0	1414.94	103.9	98.5	96.4	100.7	102.9	97.5	2	1.89	0.00134	31.0839	44
AASQPTSLAPEK	1xTMT6plex [K12]; 1xTMT6plex [N-Term]	4.67188e-06	0	3	Q96N66	MBOAT7	Lysophospholipid acyltransferase 7 OS=Homo sapiens OX=9606 GN=MBOAT7 PE=1 SV=2	0	1657.95	98	103.4	95.3	100.6	101.5	101.3	2	5.04	0.00418	16.1034	66
AASQSTQVPTITEGVAAALLLLK	1xTMT6plex [K23]; 1xTMT6plex [N-Term]	3.3674e-07	0	2	Q92616	GCN1	eIF-2-alpha kinase activator GCN1 OS=Homo sapiens OX=9606 GN=GCN1 PE=1 SV=6	0	2740.62	109.2	118.9	101.7	96.8	89.6	83.8	4	2.5	0.00171	54.451	78
AASSAAQGAFQGN	1xTMT6plex [N-Term]	0.00012394	2.77511e-05	1	O15127	SCAMP2	Secretory carrier-associated membrane protein 2 OS=Homo sapiens OX=9606 GN=SCAMP2 PE=1 SV=2	0	1408.7	109.3	115	104	82.2	83.3	106.1	2	2.43	0.00171	16.2631	40
AASSVPNLK	1xTMT6plex [K9]; 1xTMT6plex [N-Term]	0.000249465	2.77511e-05	1	Q66K74	MAP1S	Microtubule-associated protein 1S OS=Homo sapiens OX=9606 GN=MAP1S PE=1 SV=2	0	1344.83	98	100.7	97.6	104.8	100.2	98.7	2	2.81	0.00189	18.003	30
AASTSMVPVAVTAAVAPVLSINSDFSDLR	1xAcetyl [N-Term]; 1xTMT6plex [N-Term]	2.29105e-05	0	1	Q9UJX2	CDC23	Cell division cycle protein 23 homolog OS=Homo sapiens OX=9606 GN=CDC23 PE=1 SV=3	0	3160.68							3	-72497.3	-76.3801	55.3658	57
AASVLNTVLR	1xAcetyl [N-Term]; 1xTMT6plex [N-Term]	0.00454562	0.000345632	1	Q9Y676	MRPS18B	28S ribosomal protein S18b, mitochondrial OS=Homo sapiens OX=9606 GN=MRPS18B PE=1 SV=1	0	1314.79							2	-174293	-114.58	42.7711	13
AASYFGMK	1xTMT6plex [K8]; 1xTMT6plex [N-Term]	0.000595103	5.20452e-05	1	O95470	SGPL1	Sphingosine-1-phosphate lyase 1 OS=Homo sapiens OX=9606 GN=SGPL1 PE=1 SV=3	0	1332.74							2	3.27	0.00218	25.8707	31
AATAAADFTAK	1xTMT6plex [K11]; 1xTMT6plex [N-Term]	0.000796635	7.57932e-05	1	Q9Y3F4	STRAP	Serine-threonine kinase receptor-associated protein OS=Homo sapiens OX=9606 GN=STRAP PE=1 SV=1	0	1495.85	97.7	86.7	93.3	118.5	103.8	100.1	3	0.99	0.0005	20.6856	28
AATALLEAGLAR	1xAcetyl [N-Term]; 1xTMT6plex [N-Term]	0.000100255	2.77511e-05	1	Q8WUK0	PTPMT1	Phosphatidylglycerophosphatase and protein-tyrosine phosphatase 1 OS=Homo sapiens OX=9606 GN=PTPMT1 PE=1 SV=1	0	1427.84							2	-160495	-114.58	45.0754	60
AATAPLLEAVDNLSAFASNPEFSSIPAQISPEGR	1xTMT6plex [N-Term]	1.36755e-07	0	5	Q9Y490	TLN1	Talin-1 OS=Homo sapiens OX=9606 GN=TLN1 PE=1 SV=3	0	3699.91	99.2	114.7	109.5	88	92.6	96	3	8.51	0.01049	54.6747	70
AATASAGAGGIDGKPR	1xAcetyl [N-Term]; 1xTMT6plex [K14]; 1xTMT6plex [N-Term]	5.62852e-05	1.80381e-05	2	Q02978	SLC25A11	Mitochondrial 2-oxoglutarate/malate carrier protein OS=Homo sapiens OX=9606 GN=SLC25A11 PE=1 SV=3	0	1900.07	101.9	107.5	96.3	94	95.8	104.5	2	-120607	-114.58	14.5688	60
AATAVAAAVAGTESAQGPPGPAASLELWLNK	1xAcetyl [N-Term]; 1xTMT6plex [K31]; 1xTMT6plex [N-Term]	0.00468299	0.000377437	1	Q9UJY4	GGA2	ADP-ribosylation factor-binding protein GGA2 OS=Homo sapiens OX=9606 GN=GGA2 PE=1 SV=3	0	3419.86	103.5	101.4	103.3	98.9	106	87	3	-67004.7	-76.3822	55.0796	58
AATEALGEK	1xTMT6plex [K9]; 1xTMT6plex [N-Term]	0.00150824	0.000164178	1	Q6WCQ1	MPRIP	Myosin phosphatase Rho-interacting protein OS=Homo sapiens OX=9606 GN=MPRIP PE=1 SV=3	0	1347.79	103.3	101.3	101.6	93.5	97.6	102.7	2	3.06	0.00206	15.8905	13
AATENIPVVR	1xTMT6plex [N-Term]	0.00145786	0.000142151	1	Q6P1J9	CDC73	Parafibromin OS=Homo sapiens OX=9606 GN=CDC73 PE=1 SV=1	0	1298.76							2	1.43	0.00093	16.9581	4
AATFFGCIGIDK	1xCarbamidomethyl [C7]; 1xTMT6plex [K12]; 1xTMT6plex [N-Term]	2.13513e-06	0	2	P55263	ADK	Adenosine kinase OS=Homo sapiens OX=9606 GN=ADK PE=1 SV=2	0	1757.97	105.6	106.6	100.1	95.8	96.7	95.3	2	5.73	0.00504	40.5379	48
AATFFGEVVK	1xAcetyl [N-Term]; 1xTMT6plex [K10]; 1xTMT6plex [N-Term]	0.00695369	0.000514297	1	O95456	PSMG1	Proteasome assembly chaperone 1 OS=Homo sapiens OX=9606 GN=PSMG1 PE=1 SV=1	0	1568.91	101.9	100.1	114.9	88.5	99	95.5	2	-146063	-114.58	47.3548	41
AATGEEVPR	1xTMT6plex [N-Term]	0.000232697	2.77511e-05	1	O15294	OGT	UDP-N-acetylglucosamine--peptide N-acetylglucosaminyltransferase 110 kDa subunit OS=Homo sapiens OX=9606 GN=OGT PE=1 SV=3	0	1158.63	106.5	101.9	103.3	92.4	92.6	103.3	2	2.76	0.0016	9.7274	48
AATGEEVSAEDLGGADLHCR	1xCarbamidomethyl [C19]; 1xTMT6plex [N-Term]	3.10009e-08	0	1	Q9HCC0	MCCC2	Methylcrotonoyl-CoA carboxylase beta chain, mitochondrial OS=Homo sapiens OX=9606 GN=MCCC2 PE=1 SV=1	0	2287.08	102.1	91.7	103.2	104	96.9	102.2	3	1.01	0.00077	20.1232	69
AATGNTSEGEEAFLLIQSEK	1xTMT6plex [K20]; 1xTMT6plex [N-Term]	4.04096e-07	0	1	A0AVF1	TTC26	Intraflagellar transport protein 56 OS=Homo sapiens OX=9606 GN=TTC26 PE=2 SV=1	0	2553.34	103.9	86.6	87	124.6	103.1	94.8	3	4.27	0.00364	39.0632	40
AATLAER	1xTMT6plex [N-Term]	0.0106476	0.00084023	1	P50454	SERPINH1	Serpin H1 OS=Homo sapiens OX=9606 GN=SERPINH1 PE=1 SV=2	0	960.568	97	79.6	98.4	115.4	101	108.5	2	0.88	0.00042	9.8596	40
AATLAQELEK	1xTMT6plex [K10]; 1xTMT6plex [N-Term]	1.67782e-05	0	2	Q14683	SMC1A	Structural maintenance of chromosomes protein 1A OS=Homo sapiens OX=9606 GN=SMC1A PE=1 SV=2	0	1531.91	105.3	107.3	110.3	92.7	92	92.3	2	2.8	0.00214	28.0332	57
AATLAVPPPEDVQPSAQQLELLELEMR	1xTMT6plex [N-Term]	3.25566e-05	0	1	Q9H8G2	CAAP1	Caspase activity and apoptosis inhibitor 1 OS=Homo sapiens OX=9606 GN=CAAP1 PE=1 SV=2	0	3174.69	98.4	90.4	113.6	103.3	95.9	98.4	3	1.03	0.00109	49.4624	26
AATLEGWK	1xTMT6plex [K8]; 1xTMT6plex [N-Term]	0.00063775	6.47502e-05	1	P57740	NUP107	Nuclear pore complex protein Nup107 OS=Homo sapiens OX=9606 GN=NUP107 PE=1 SV=1	0	1333.79	101.6	100.2	99	99.5	99.8	99.9	2	3.3	0.0022	26.4783	39
AATLILEPAGR	1xTMT6plex [N-Term]	0.000101889	2.77511e-05	1	Q86TX2	ACOT1	Acyl-coenzyme A thioesterase 1 OS=Homo sapiens OX=9606 GN=ACOT1 PE=1 SV=1	0	1340.81	106.5	97.9	94.4	95.4	103.4	102.4	2	1.87	0.00125	25.4152	32
AATILTK	1xTMT6plex [K7]; 1xTMT6plex [N-Term]	0.0105595	0.00084023	1	Q15003	NCAPH	Condensin complex subunit 2 OS=Homo sapiens OX=9606 GN=NCAPH PE=1 SV=3	0	1175.78	104.4	99	104	97.1	99.1	96.4	2	2.21	0.0013	20.0407	36
AATLMMLGR	1xTMT6plex [N-Term]	0.000595103	5.20452e-05	1	Q99615	DNAJC7	DnaJ homolog subfamily C member 7 OS=Homo sapiens OX=9606 GN=DNAJC7 PE=1 SV=2	0	1192.67	98.2	102.3	110.7	95.1	92.2	101.5	2	2.26	0.00135	29.4711	24
AATLPHEQR	1xTMT6plex [N-Term]	0.000328565	3.92285e-05	2	Q6PD74	AAGAB	Alpha- and gamma-adaptin-binding protein p34 OS=Homo sapiens OX=9606 GN=AAGAB PE=1 SV=1	0	1251.7	106.9	99.3	101.7	100.8	94	97.4	3	-1.23	-0.00051	8.676	16
AATITPFR	1xTMT6plex [N-Term]	0.00857437	0.000640067	1	Q13423	NNT	NAD(P) transhydrogenase, mitochondrial OS=Homo sapiens OX=9606 GN=NNT PE=1 SV=3	0	1105.66	98.2	95.4	98.1	99.8	102.6	105.9	2	3.82	0.00211	19.5483	23
AATPLPSLR	1xTMT6plex [N-Term]	0.160518	0.00558231	1	Q9Y3Q8	TSC22D4	TSC22 domain family protein 4 OS=Homo sapiens OX=9606 GN=TSC22D4 PE=1 SV=2	0	1154.71	96.3	100.4	103.5	99.6	102.7	97.6	2	2.26	0.0013	19.6201	19
AATQCEFSK	1xCarbamidomethyl [C5]; 1xTMT6plex [K9]; 1xTMT6plex [N-Term]	0.000125216	2.77511e-05	1	Q96GG9	DCUN1D1	DCN1-like protein 1 OS=Homo sapiens OX=9606 GN=DCUN1D1 PE=1 SV=1	0	1499.79	104.2	99.1	106.9	92.2	99.5	98.1	2	1.1	0.00082	15.4127	40
AATQFWR	1xTMT6plex [N-Term]	0.0380179	0.00237329	1	P13667	PDIA4	Protein disulfide-isomerase A4 OS=Homo sapiens OX=9606 GN=PDIA4 PE=1 SV=2	0	1108.61	94.8	96.2	95.1	109.5	100.8	103.7	2	2.48	0.00137	21.5021	13
AATSEGVQVK	1xTMT6plex [K10]; 1xTMT6plex [N-Term]	4.27401e-05	1.80381e-05	1	P51608	MECP2	Methyl-CpG-binding protein 2 OS=Homo sapiens OX=9606 GN=MECP2 PE=1 SV=1	0	1447.85	93.6	102.2	98.2	85.8	86.8	133.4	2	3.06	0.00221	13.2179	37
AATSPALFNR	1xTMT6plex [N-Term]	8.21542e-05	2.77511e-05	1	Q14204	DYNC1H1	Cytoplasmic dynein 1 heavy chain 1 OS=Homo sapiens OX=9606 GN=DYNC1H1 PE=1 SV=5	0	1276.72	98.1	96.4	98.8	99.1	105.8	101.8	2	3.55	0.00227	18.2853	28
AATTEPTEVEEVVPALEPTETLLSEK	1xTMT6plex [K26]; 1xTMT6plex [N-Term]	2.81347e-05	0	1	Q9BXK5	BCL2L13	Bcl-2-like protein 13 OS=Homo sapiens OX=9606 GN=BCL2L13 PE=1 SV=1	0	3241.73							3	1.14	0.00123	48.111	37
AATTLDEK	1xTMT6plex [K8]; 1xTMT6plex [N-Term]	0.00120336	0.000132543	1	Q96GQ7	DDX27	Probable ATP-dependent RNA helicase DDX27 OS=Homo sapiens OX=9606 GN=DDX27 PE=1 SV=2	0	1306.76	110.7	100.9	110.7	93.6	89	95.1	2	1.8	0.00118	14.2588	36
AATTLDEPIWR	1xTMT6plex [N-Term]	0.0459052	0.00261332	1	Q9H987	SYNPO2L	Synaptopodin 2-like protein OS=Homo sapiens OX=9606 GN=SYNPO2L PE=2 SV=3	0	1501.82	98.5	90	88.5	119.7	97.5	105.7	3	3.79	0.0019	38.9188	8
AATTIEMK	1xTMT6plex [K8]; 1xTMT6plex [N-Term]	0.00491947	0.000395322	1	Q96BP3	PPWD1	Peptidylprolyl isomerase domain and WD repeat-containing protein 1 OS=Homo sapiens OX=9606 GN=PPWD1 PE=1 SV=1	0	1322.78							2	2.62	0.00173	18.0578	14
AATTVLQELK	1xTMT6plex [K10]; 1xTMT6plex [N-Term]	1.76684e-05	0	1	Q9NUL3	STAU2	Double-stranded RNA-binding protein Staufen homolog 2 OS=Homo sapiens OX=9606 GN=STAU2 PE=1 SV=2	0	1531.95	98.4	98	101.1	102.7	99.4	100.4	2	2.08	0.00159	31.7112	67
AATVVAR	1xTMT6plex [N-Term]	0.00891533	0.000658429	1	P10644	PRKAR1A	cAMP-dependent protein kinase type I-alpha regulatory subunit OS=Homo sapiens OX=9606 GN=PRKAR1A PE=1 SV=1	0	916.578	87.7	101.8	100.7	103.3	108.6	97.9	2	1.01	0.00046	8.8416	33
AAVAASSSS	1xTMT6plex [N-Term]	0.256799	0.00792202	1	P61927	RPL37	60S ribosomal protein L37 OS=Homo sapiens OX=9606 GN=RPL37 PE=1 SV=2	0	979.526							2	3.1	0.00152	9.5845	27
AAVAGEDGR	1xTMT6plex [N-Term]	0.000870325	8.78677e-05	1	P07910	HNRNPC	Heterogeneous nuclear ribonucleoproteins C1/C2 OS=Homo sapiens OX=9606 GN=HNRNPC PE=1 SV=4	0	1074.57	105.6	101.7	106.5	93.6	96.7	95.8	2	2.08	0.00112	8.2892	49
AAVAGLDK	1xTMT6plex [K8]; 1xTMT6plex [N-Term]	0.00233762	0.000201691	1	P22102	GART	Trifunctional purine biosynthetic protein adenosine-3 OS=Homo sapiens OX=9606 GN=GART PE=1 SV=1	0	1202.75	105.3	98.3	100.1	100.1	98.8	97.3	2	2.14	0.00129	17.7607	13
AAVATFLQSVQVPEFTPK	1xTMT6plex [K18]; 1xTMT6plex [N-Term]	1.16427e-07	0	3	P22314	UBA1	Ubiquitin-like modifier-activating enzyme 1 OS=Homo sapiens OX=9606 GN=UBA1 PE=1 SV=3	0	2391.37	105.3	114.2	94.1	95.8	97.2	93.4	2	7.41	0.00886	50.7651	99
AAVAWEAGKPLSIEEIEVAPPK	2xTMT6plex [K9; K22]; 1xTMT6plex [N-Term]	9.45592e-09	0	3	P11766	ADH5	Alcohol dehydrogenase class-3 OS=Homo sapiens OX=9606 GN=ADH5 PE=1 SV=4	0	2992.73	92.4	99.6	88.4	103.6	108.2	107.7	3	3.21	0.0032	39.9423	43
AAVDAGFVPNDMQVGQTGK	1xTMT6plex [K19]; 1xTMT6plex [N-Term]	9.76983e-07	0	2	P13804	ETFA	Electron transfer flavoprotein subunit alpha, mitochondrial OS=Homo sapiens OX=9606 GN=ETFA PE=1 SV=1	0	2363.24	94.1	91.5	93.2	110.1	106.1	105	2	1.35	0.0016	31.2974	82
AAVDLEK	1xAcetyl [N-Term]; 1xTMT6plex [K7]; 1xTMT6plex [N-Term]	0.194622	0.00648159	1	P17858	PFKL	ATP-dependent 6-phosphofructokinase, liver type OS=Homo sapiens OX=9606 GN=PFKL PE=1 SV=6	0	1245.75	112.3	100.1	95.8	95.4	99.1	97.4	2	-183954	-114.58	24.2503	20
AAVDLKPTLTIIK	2xTMT6plex [K6; K13]; 1xTMT6plex [N-Term]	5.85869e-05	1.80381e-05	1	P14921	ETS1	Protein C-ets-1 OS=Homo sapiens OX=9606 GN=ETS1 PE=1 SV=1	0	2070.35	125.9	103.3	121.4	88.5	80.6	80.3	3	2.79	0.00192	33.3486	6
AAVDYQK	1xTMT6plex [K7]; 1xTMT6plex [N-Term]	0.0169622	0.00146736	1	P31153	MAT2A	S-adenosylmethionine synthase isoform type-2 OS=Homo sapiens OX=9606 GN=MAT2A PE=1 SV=1	0	1252.73	106.5	110.4	106.8	91.9	94.2	90.2	2	2.82	0.00177	13.9693	19
AAVEDPR	1xTMT6plex [N-Term]	0.320927	0.00937837	1	P36957	DLST	Dihydrolipoyllysine-residue succinyltransferase component of 2-oxoglutarate dehydrogenase complex, mitochondrial OS=Homo sapiens OX=9606 GN=DLST PE=1 SV=4	0	986.547	95	93.5	90.3	105.5	106.7	108.9	2	1.77	0.00087	9.2607	35
AAVEDSGTTVETIK	1xTMT6plex [K14]; 1xTMT6plex [N-Term]	1.74928e-08	0	1	Q5VTR2	RNF20	E3 ubiquitin-protein ligase BRE1A OS=Homo sapiens OX=9606 GN=RNF20 PE=1 SV=2	0	1879.04	100.4	105.8	108.6	89.2	101.7	94.2	2	2.38	0.00224	21.1104	83
AAVEEGIVLGGGCALLR	1xCarbamidomethyl [C13]; 1xTMT6plex [N-Term]	1.95884e-10	0	12	P10809	HSPD1	60 kDa heat shock protein, mitochondrial OS=Homo sapiens OX=9606 GN=HSPD1 PE=1 SV=2	0	1914.07	102.8	103.3	106.4	93.4	95.4	98.7	2	2	0.00191	38.8801	95
AAVEELLER	1xTMT6plex [N-Term]	0.000254675	2.77511e-05	1	Q15814	TBCC	Tubulin-specific chaperone C OS=Homo sapiens OX=9606 GN=TBCC PE=1 SV=2	0	1258.72	97.7	93.7	98.7	106.4	102.5	101	2	2.1	0.00132	30.2213	27
AAVEGTVEAGATVESTAC	1xCarbamidomethyl [C18]; 1xTMT6plex [N-Term]	0.00761155	0.000542944	7	P49321	NASP	Nuclear autoantigenic sperm protein OS=Homo sapiens OX=9606 GN=NASP PE=1 SV=2	0	1951.95	100.9	101.3	104.6	100.5	96.5	96.3	3	5.83	0.00379	54.912	30
AAVELEEPEDAR	1xTMT6plex [N-Term]	0.000135115	2.77511e-05	1	O94906	PRPF6	Pre-mRNA-processing factor 6 OS=Homo sapiens OX=9606 GN=PRPF6 PE=1 SV=1	0	1557.8	95.5	101.5	104.7	101.3	99.5	97.5	2	0.97	0.00075	19.0242	43
AAVENHVR	1xTMT6plex [N-Term]	0.000631887	6.47502e-05	1	P49247	RPIA	Ribose-5-phosphate isomerase OS=Homo sapiens OX=9606 GN=RPIA PE=1 SV=3	0	1124.64							3	3.3	0.00124	7.6142	35
AAVENLPTFLVELSR	1xTMT6plex [N-Term]	3.15974e-06	0	3	Q14974	KPNB1	Importin subunit beta-1 OS=Homo sapiens OX=9606 GN=KPNB1 PE=1 SV=2	0	1888.07	93.7	99.2	99.5	102.8	99.4	105.5	3	3.36	0.00212	50.9999	64
AAVEQEK	1xTMT6plex [K7]; 1xTMT6plex [N-Term]	0.0118036	0.000981532	1	Q15075	EEA1	Early endosome antigen 1 OS=Homo sapiens OX=9606 GN=EEA1 PE=1 SV=2	0	1232.73							2	0.65	0.0004	10.1941	13
AAVESLGFILFR	1xTMT6plex [N-Term]	1.65735e-06	0	2	Q99460	PSMD1	26S proteasome non-ATPase regulatory subunit 1 OS=Homo sapiens OX=9606 GN=PSMD1 PE=1 SV=2	0	1551.91	114.9	121.2	98.8	85.1	88.3	91.8	3	7.44	0.00385	50.843	55
AAVETLGVPCFLGGMAR	1xCarbamidomethyl [C10]; 1xTMT6plex [N-Term]	2.9321e-06	0	2	A1L0T0	ILVBL	Acetolactate synthase-like protein OS=Homo sapiens OX=9606 GN=ILVBL PE=1 SV=2	0	1978.05	92.2	98.6	101	106.1	99.2	102.8	3	5.18	0.00341	43.2091	40
AAVEWFDGK	1xTMT6plex [K9]; 1xTMT6plex [N-Term]	0.000132779	2.77511e-05	1	Q01844	EWSR1	RNA-binding protein EWS OS=Homo sapiens OX=9606 GN=EWSR1 PE=1 SV=1	0	1480.82	99.2	101.3	95.3	102	104.9	97.4	2	2.94	0.00218	33.1867	42
AAVEWFDGKDFQGSK	2xTMT6plex [K9; K15]; 1xTMT6plex [N-Term]	2.38611e-05	0	2	Q01844	EWSR1	RNA-binding protein EWS OS=Homo sapiens OX=9606 GN=EWSR1 PE=1 SV=1	1	2372.29	93.8	93.4	99.6	104.2	107.8	101.1	3	1.52	0.00121	33.6979	19
AAVFEEEDFQSMTYGFK	1xTMT6plex [K17]; 1xTMT6plex [N-Term]	1.23616e-05	0	1	Q5VZE5	NAA35	N-alpha-acetyltransferase 35, NatC auxiliary subunit OS=Homo sapiens OX=9606 GN=NAA35 PE=1 SV=1	0	2457.2	105.5	109.8	105.4	93.2	95.4	90.6	3	5.23	0.00428	46.1237	39
AAVFEEIDTYER	1xTMT6plex [N-Term]	6.24766e-06	0	1	Q96F86	EDC3	Enhancer of mRNA-decapping protein 3 OS=Homo sapiens OX=9606 GN=EDC3 PE=1 SV=1	0	1671.84	86.3	123.3	101.2	111.3	94.4	83.6	2	1.95	0.00163	34.1302	47
AAVFLALEEQEK	1xTMT6plex [K12]; 1xTMT6plex [N-Term]	1.57095e-06	0	2	O95684	FGFR1OP	FGFR1 oncogene partner OS=Homo sapiens OX=9606 GN=FGFR1OP PE=1 SV=1	0	1806.04	100.6	98.4	98	97.9	100.3	104.8	2	3.3	0.00298	39.7379	57
AAVGEEK	1xTMT6plex [K7]; 1xTMT6plex [N-Term]	0.00795789	0.000592381	1	P46013	MKI67	Proliferation marker protein Ki-67 OS=Homo sapiens OX=9606 GN=MKI67 PE=1 SV=2	0	1161.69	109.3	101.6	104.1	93.2	95.5	96.3	2	1.33	0.00077	10.0738	24
AAVGEEKDINTFVGTPVEK	2xTMT6plex [K7; K19]; 1xTMT6plex [N-Term]	1.72371e-06	0	1	P46013	MKI67	Proliferation marker protein Ki-67 OS=Homo sapiens OX=9606 GN=MKI67 PE=1 SV=2	1	2691.52	98.8	95.5	98.4	105.2	102.2	99.9	3	3.42	0.00306	29.3322	27
AAVGQESPGGLEAGNAK	1xTMT6plex [K17]; 1xTMT6plex [N-Term]	1.10346e-07	0	2	Q29RF7	PDS5A	Sister chromatid cohesion protein PDS5 homolog A OS=Homo sapiens OX=9606 GN=PDS5A PE=1 SV=1	0	2014.1	107.8	107.6	103.7	90.1	97.7	93.2	2	1.23	0.00124	17.5964	102
AAVGRPLDK	1xTMT6plex [K9]; 1xTMT6plex [N-Term]	0.0128656	0.0010625	1	Q8WUM4	PDCD6IP	Programmed cell death 6-interacting protein OS=Homo sapiens OX=9606 GN=PDCD6IP PE=1 SV=1	0	1384.87	103.2	96.5	95.5	108.7	99.6	96.5	3	2.05	0.00094	12.504	7
AAVGRPLDKHEGALETLLR	1xTMT6plex [K9]; 1xTMT6plex [N-Term]	1.05614e-05	0	1	Q8WUM4	PDCD6IP	Programmed cell death 6-interacting protein OS=Homo sapiens OX=9606 GN=PDCD6IP PE=1 SV=1	1	2504.47							5	7.41	0.00371	24.0561	20
AAVHLEGK	1xTMT6plex [K8]; 1xTMT6plex [N-Term]	0.000226197	2.77511e-05	3	P18206	VCL	Vinculin OS=Homo sapiens OX=9606 GN=VCL PE=1 SV=4	0	1282.79	102.1	104.4	97.7	98.2	99.3	98.3	2	2.79	0.00179	13.4282	42
AAVHYDR	1xTMT6plex [N-Term]	0.00926665	0.00067718	3	Q86V81	ALYREF	THO complex subunit 4 OS=Homo sapiens OX=9606 GN=ALYREF PE=1 SV=3	0	1060.57							2	1.56	0.00083	7.9665	28
AAVLESLLR	1xAcetyl [N-Term]; 1xTMT6plex [N-Term]	0.000438166	3.92285e-05	1	Q8IWY9	CDAN1	Codanin-1 OS=Homo sapiens OX=9606 GN=CDAN1 PE=1 SV=4	0	1242.76							2	-184393	-114.578	54.2662	47
AAVLFATDIAAR	1xTMT6plex [N-Term]	2.26049e-06	0	2	Q13206	DDX10	Probable ATP-dependent RNA helicase DDX10 OS=Homo sapiens OX=9606 GN=DDX10 PE=1 SV=2	0	1447.85	107.9	101.5	110.3	92.1	92.6	95.4	3	2.8	0.00135	34.41	50
AAVIGDVIR	1xTMT6plex [N-Term]	0.000137989	2.77511e-05	1	Q9NR30	DDX21	Nucleolar RNA helicase 2 OS=Homo sapiens OX=9606 GN=DDX21 PE=1 SV=5	0	1142.71	127.5	102.8	137	74.6	79.8	78.3	2	3.03	0.00173	24.3317	53
AAVLGENGR	1xTMT6plex [N-Term]	0.00294601	0.000232546	1	Q9UKM9	RALY	RNA-binding protein Raly OS=Homo sapiens OX=9606 GN=RALY PE=1 SV=1	0	1115.64	93.1	84.9	93.6	95.9	94.7	137.9	2	2.82	0.00157	11.6397	30
AAVLQQVLER	1xAcetyl [N-Term]; 1xTMT6plex [N-Term]	0.000164086	2.77511e-05	1	P12270	TPR	Nucleoprotein TPR OS=Homo sapiens OX=9606 GN=TPR PE=1 SV=3	0	1397.83							2	-163937	-114.578	48.8378	90
AAVMATLLFPGR	1xTMT6plex [N-Term]	0.000606181	5.20452e-05	1	Q96GX9	APIP	Methylthioribulose-1-phosphate dehydratase OS=Homo sapiens OX=9606 GN=APIP PE=1 SV=1	0	1475.86	110.8	114.2	102.3	92.5	87.7	92.6	2	1.7	0.00126	42.9464	18
AAVMHDILDMMPEGIK	1xTMT6plex [K16]; 1xTMT6plex [N-Term]	2.57917e-06	0	2	Q6P2Q9	PRPF8	Pre-mRNA-processing-splicing factor 8 OS=Homo sapiens OX=9606 GN=PRPF8 PE=1 SV=2	0	2229.18	97.6	99.5	104.9	98.1	96.4	103.5	3	1.38	0.00103	46.3305	37
AAVMVYDDANKK	2xTMT6plex [K11; K12]; 1xTMT6plex [N-Term]	1.04509e-05	0	1	Q8N8S7	ENAH	Protein enabled homolog OS=Homo sapiens OX=9606 GN=ENAH PE=1 SV=2	1	2012.15	98.5	105.4	100.5	101.6	99.6	94.4	3	3.03	0.00203	20.9139	13
AAVPDAVGK	1xTMT6plex [K9]; 1xTMT6plex [N-Term]	0.00550076	0.000404561	2	P50993; P05023; P13637	ATP1A2; ATP1A1; ATP1A3	Sodium/potassium-transporting ATPase subunit alpha-2 OS=Homo sapiens OX=9606 GN=ATP1A2 PE=1 SV=1;Sodium/potassium-transporting ATPase subunit alpha-1 OS=Homo sapiens OX=9606 GN=ATP1A1 PE=1 SV=1;Sodium/potassium-transporting ATPase subunit alpha-3 OS=Homo sapiens OX=9606 GN=ATP1A3 PE=1 SV=3	0	1285.79	99.7	110.4	98.3	92.4	103.4	95.9	2	1.52	0.00098	16.6666	46
AAVPSGASTGIYEALELR	1xTMT6plex [N-Term]	4.70175e-11	0	18	P09104; P06733	ENO2; ENO1	Gamma-enolase OS=Homo sapiens OX=9606 GN=ENO2 PE=1 SV=3;Alpha-enolase OS=Homo sapiens OX=9606 GN=ENO1 PE=1 SV=2	0	2034.11	97.7	103.7	101.2	98.2	98.2	101.1	3	3.25	0.0022	38.4076	93
AAVPSGASTGIYEALELRDNDK	1xTMT6plex [K22]; 1xTMT6plex [N-Term]	0.000475387	3.92285e-05	1	P06733	ENO1	Alpha-enolase OS=Homo sapiens OX=9606 GN=ENO1 PE=1 SV=2	1	2735.46	91.8	101.6	98.6	103.9	105.6	98.6	3	1.76	0.0016	34.1319	4
AAVPSIK	1xTMT6plex [K7]; 1xTMT6plex [N-Term]	0.0996103	0.00425097	1	P00558	PGK1	Phosphoglycerate kinase 1 OS=Homo sapiens OX=9606 GN=PGK1 PE=1 SV=3	0	1143.75	98.7	115.6	92.6	99.4	99.2	94.5	2	1.71	0.00098	17.9566	27
AAVQFLNNAWGIQK	1xTMT6plex [K14]; 1xTMT6plex [N-Term]	3.64306e-06	0	1	Q9UMY1	NOL7	Nucleolar protein 7 OS=Homo sapiens OX=9606 GN=NOL7 PE=1 SV=2	0	2018.16	109.5	107.3	120.2	83.9	84	95.1	3	4.83	0.00325	42.5899	48
AAVQMDPELAK	1xAcetyl [N-Term]; 1xTMT6plex [K11]; 1xTMT6plex [N-Term]	0.00241035	0.000201691	1	Q9Y312	AAR2	Protein AAR2 homolog OS=Homo sapiens OX=9606 GN=AAR2 PE=1 SV=2	0	1672.93	97.2	94.7	106.9	107.2	94.1	99.9	2	-136985	-114.583	31.7513	46
AAVQVLDDIEK	1xTMT6plex [K11]; 1xTMT6plex [N-Term]	8.43442e-06	0	1	P22033	MMUT	Methylmalonyl-CoA mutase, mitochondrial OS=Homo sapiens OX=9606 GN=MMUT PE=1 SV=4	0	1658.97							2	2.6	0.00216	34.4975	37
AAVSQQGEQLQTER	1xTMT6plex [N-Term]	1.25957e-07	0	2	Q9BQS8	FYCO1	FYVE and coiled-coil domain-containing protein 1 OS=Homo sapiens OX=9606 GN=FYCO1 PE=1 SV=3	0	1773.93	89.4	85.5	79.7	116.2	115.2	113.9	2	-0.21	-0.00019	12.5497	51
AAVSTNCR	1xCarbamidomethyl [C7]; 1xTMT6plex [N-Term]	0.073084	0.00338512	1	P78346	RPP30	Ribonuclease P protein subunit p30 OS=Homo sapiens OX=9606 GN=RPP30 PE=1 SV=1	0	1107.58	99	98.6	101.1	99	100.3	101.9	2	1.21	0.00067	8.0787	8
AAVTPGK	1xTMT6plex [K7]; 1xTMT6plex [N-Term]	0.0301624	0.0020481	2	P19338	NCL	Nucleolin OS=Homo sapiens OX=9606 GN=NCL PE=1 SV=3	0	1101.7	111.5	105.7	106.4	89.7	96.2	90.5	2	2.07	0.00114	10.9789	30
AAVTPGKK	2xTMT6plex [K7; K8]; 1xTMT6plex [N-Term]	0.14027	0.00510139	1	P19338	NCL	Nucleolin OS=Homo sapiens OX=9606 GN=NCL PE=1 SV=3	1	1458.96	108.7	105.4	103.1	88.1	94.3	100.3	2	2.34	0.00171	10.194	16
AAVVENVVK	1xAcetyl [N-Term]; 1xTMT6plex [K9]; 1xTMT6plex [N-Term]	0.17564	0.00595876	1	Q92785	DPF2	Zinc finger protein ubi-d4 OS=Homo sapiens OX=9606 GN=DPF2 PE=1 SV=2	0	1428.88							2	-160377	-114.58	33.5011	29
AAVVESHK	1xTMT6plex [K8]; 1xTMT6plex [N-Term]	0.00191045	0.000195329	1	P00390	GSR	Glutathione reductase, mitochondrial OS=Homo sapiens OX=9606 GN=GSR PE=1 SV=2	0	1298.78	113.8	105.8	108.9	88.9	92.4	90.2	3	1.21	0.00052	9.5011	37
AAVVPLGTWR	1xTMT6plex [N-Term]	0.11668	0.00458911	1	Q15125	EBP	3-beta-hydroxysteroid-Delta(8),Delta(7)-isomerase OS=Homo sapiens OX=9606 GN=EBP PE=1 SV=3	0	1298.78							2	4.06	0.00264	28.7596	12
AAVVVSK	1xTMT6plex [K7]; 1xTMT6plex [N-Term]	0.0032664	0.000252074	2	Q14978	NOLC1	Nucleolar and coiled-body phosphoprotein 1 OS=Homo sapiens OX=9606 GN=NOLC1 PE=1 SV=2	0	1131.75	108.7	100.3	112.1	86.6	94.5	97.8	2	1.62	0.00092	14.4425	38
AAWEHMK	1xTMT6plex [K7]; 1xTMT6plex [N-Term]	0.0207718	0.00167179	1	P51659	HSD17B4	Peroxisomal multifunctional enzyme type 2 OS=Homo sapiens OX=9606 GN=HSD17B4 PE=1 SV=3	0	1330.73	94.2	92.8	91	113.8	105.2	103	3	3.14	0.00139	15.9837	15
AAWGEETDYTPVWCMR	1xCarbamidomethyl [C14]; 1xTMT6plex [N-Term]	1.67519e-06	0	2	P06132	UROD	Uroporphyrinogen decarboxylase OS=Homo sapiens OX=9606 GN=UROD PE=1 SV=2	0	2201	96.5	96.4	101.2	110.9	96	99	2	4.32	0.00476	40.9407	57
AAWYTAGIVGGLSTVAMCAPSEK	1xCarbamidomethyl [C18]; 1xTMT6plex [K23]; 1xTMT6plex [N-Term]	5.15146e-08	0	1	Q9H3K2	GHITM	Growth hormone-inducible transmembrane protein OS=Homo sapiens OX=9606 GN=GHITM PE=1 SV=2	0	2798.46	102.4	90.8	104.9	100.1	102	99.8	3	9.18	0.00857	50.192	52
AAYDIEVNTR	1xTMT6plex [N-Term]	4.43983e-05	1.80381e-05	1	O75955	FLOT1	Flotillin-1 OS=Homo sapiens OX=9606 GN=FLOT1 PE=1 SV=3	0	1380.73	95.7	89.9	95.8	117.3	99	102.4	2	1.27	0.00088	19.2781	48
AAYDVSSFSFFQR	1xTMT6plex [N-Term]	6.0523e-07	0	4	O15498	YKT6	Synaptobrevin homolog YKT6 OS=Homo sapiens OX=9606 GN=YKT6 PE=1 SV=1	0	1753.87	95.7	101.5	105.9	98.9	94.5	103.5	3	1.09	0.00064	41.1823	38
AAYEAELGDAR	1xTMT6plex [N-Term]	3.50326e-06	0	1	P02545	LMNA	Prelamin-A/C OS=Homo sapiens OX=9606 GN=LMNA PE=1 SV=1	0	1394.71	102.9	106.9	102.4	92.7	101.4	93.6	2	1.51	0.00105	18.1421	60
AAYFGIYDTAK	1xTMT6plex [K11]; 1xTMT6plex [N-Term]	4.63883e-06	0	3	P05141	SLC25A5	ADP/ATP translocase 2 OS=Homo sapiens OX=9606 GN=SLC25A5 PE=1 SV=7	0	1677.93	97.7	96.1	96.7	103.1	106.7	99.7	2	1.59	0.00134	32.3837	54
AAYFGVYDTAK	1xTMT6plex [K11]; 1xTMT6plex [N-Term]	5.48039e-06	0	4	P12236; P12235	SLC25A6; SLC25A4	ADP/ATP translocase 3 OS=Homo sapiens OX=9606 GN=SLC25A6 PE=1 SV=4;ADP/ATP translocase 1 OS=Homo sapiens OX=9606 GN=SLC25A4 PE=1 SV=4	0	1663.91	97.2	92.9	96.1	105	104.7	104.1	2	0.6	0.0005	29.418	55
AAYLQETGKPLDETLK	2xTMT6plex [K9; K16]; 1xTMT6plex [N-Term]	8.87184e-08	0	4	P04083	ANXA1	Annexin A1 OS=Homo sapiens OX=9606 GN=ANXA1 PE=1 SV=2	0	2464.43	98	102.6	95.1	103.2	105.4	95.7	2	3.55	0.00437	28.8057	47
AAYLQETGKPLDETLKK	3xTMT6plex [K9; K16; K17]; 1xTMT6plex [N-Term]	2.51857e-05	0	4	P04083	ANXA1	Annexin A1 OS=Homo sapiens OX=9606 GN=ANXA1 PE=1 SV=2	1	2821.68	93.1	101.6	93.8	108.4	107.7	95.3	4	1.98	0.0014	26.706	17
AAYNLVR	1xTMT6plex [N-Term]	0.0120977	0.000999255	2	Q14019	COTL1	Coactosin-like protein OS=Homo sapiens OX=9606 GN=COTL1 PE=1 SV=3	0	1035.61	102.5	102.8	98.4	91.1	101	104.2	2	2.07	0.00107	15.5267	27
AAYNPGQAVPWNAVK	1xTMT6plex [K15]; 1xTMT6plex [N-Term]	1.01978e-06	0	2	Q8N163	CCAR2	Cell cycle and apoptosis regulator protein 2 OS=Homo sapiens OX=9606 GN=CCAR2 PE=1 SV=2	0	2044.14	104	102.6	99.5	98.3	94.1	101.4	2	1.9	0.00194	31.4303	71
AAYNQVK	1xTMT6plex [K7]; 1xTMT6plex [N-Term]	0.0109608	0.00088835	2	P22695	UQCRC2	Cytochrome b-c1 complex subunit 2, mitochondrial OS=Homo sapiens OX=9606 GN=UQCRC2 PE=1 SV=3	0	1251.75	98.1	99.2	97.8	102.8	102.2	99.9	2	2.44	0.00153	13.0252	20
AAYPDLENPPLLVTPSQQAK	1xTMT6plex [K20]; 1xTMT6plex [N-Term]	3.23946e-06	0	4	P54136	RARS	Arginine--tRNA ligase, cytoplasmic OS=Homo sapiens OX=9606 GN=RARS PE=1 SV=2	0	2610.45	94.5	104.5	95.2	106.8	98.2	100.7	2	2.74	0.00357	37.4145	76
AAYQVAALPK	1xTMT6plex [K10]; 1xTMT6plex [N-Term]	7.08559e-05	2.77511e-05	1	P52758	RIDA	2-iminobutanoate/2-iminopropanoate deaminase OS=Homo sapiens OX=9606 GN=RIDA PE=1 SV=1	0	1489.91	95.1	97.5	99.6	99.6	102.7	105.4	2	3.82	0.00285	23.9568	40
AAYSNFWCGMTSQGYYK	1xCarbamidomethyl [C8]; 1xTMT6plex [K17]; 1xTMT6plex [N-Term]	1.30709e-05	0	1	Q8NBJ5	COLGALT1	Procollagen galactosyltransferase 1 OS=Homo sapiens OX=9606 GN=COLGALT1 PE=1 SV=1	0	2492.18	100.8	108.1	98.4	102.3	94.3	96.1	3	-0.25	-0.00021	40.8943	38
AAYWEEEPAEVR	1xTMT6plex [N-Term]	1.79912e-06	0	2	Q9Y6Y8	SEC23IP	SEC23-interacting protein OS=Homo sapiens OX=9606 GN=SEC23IP PE=1 SV=1	0	1678.83	101.9	101.2	101.9	100.8	96.6	97.6	2	1.9	0.0016	24.761	55
ACAAQTK	1xCarbamidomethyl [C2]; 1xTMT6plex [K7]; 1xTMT6plex [N-Term]	0.0111433	0.00089687	1	P17980	PSMC3	26S proteasome regulatory subunit 6A OS=Homo sapiens OX=9606 GN=PSMC3 PE=1 SV=3	0	1207.69	106.7	107.5	103.2	90.9	97.2	94.6	2	0.22	0.00013	8.3746	30
ACADATLSQITNNIDPVGR	1xCarbamidomethyl [C2]; 1xTMT6plex [N-Term]	2.86182e-10	0	2	P62873	GNB1	Guanine nucleotide-binding protein G(I)/G(S)/G(T) subunit beta-1 OS=Homo sapiens OX=9606 GN=GNB1 PE=1 SV=3	0	2245.14	99.4	99.8	95.5	102.1	98.5	104.7	2	1.92	0.00216	37.8839	73
ACAEALR	1xCarbamidomethyl [C2]; 1xTMT6plex [N-Term]	0.0198246	0.00165905	1	O60232	ZNRD2	Protein ZNRD2 OS=Homo sapiens OX=9606 GN=ZNRD2 PE=1 SV=1	0	1019.55							2	2.21	0.00113	10.1994	11
ACAECFMAVSCATCQEIR	4xCarbamidomethyl [C2; C5; C11; C14]; 1xTMT6plex [N-Term]	9.56263e-07	0	1	Q8TF05	PPP4R1	Serine/threonine-protein phosphatase 4 regulatory subunit 1 OS=Homo sapiens OX=9606 GN=PPP4R1 PE=1 SV=1	0	2393.04	101.5	99.8	90.7	101.7	104.1	102.1	3	3.43	0.00274	32.3724	41
ACAEVSQWTR	1xCarbamidomethyl [C2]; 1xTMT6plex [N-Term]	0.000103219	2.77511e-05	1	Q8NEC7	GSTCD	Glutathione S-transferase C-terminal domain-containing protein OS=Homo sapiens OX=9606 GN=GSTCD PE=1 SV=2	0	1436.72	102.8	97.7	98.9	96.2	97.9	106.5	2	1.2	0.00086	19.9657	15
ACALSIEESCRPGDK	2xCarbamidomethyl [C2; C10]; 1xTMT6plex [K15]; 1xTMT6plex [N-Term]	1.84463e-06	0	2	P31040	SDHA	Succinate dehydrogenase [ubiquinone] flavoprotein subunit, mitochondrial OS=Homo sapiens OX=9606 GN=SDHA PE=1 SV=2	0	2151.09	99.7	104.9	93.8	95.4	98.9	107.2	2	1.91	0.00205	18.663	43
ACALSQINTK	1xCarbamidomethyl [C2]; 1xTMT6plex [K10]; 1xTMT6plex [N-Term]	3.6746e-05	0	2	O95825	CRYZL1	Quinone oxidoreductase-like protein 1 OS=Homo sapiens OX=9606 GN=CRYZL1 PE=1 SV=2	0	1563.89	100.3	94.3	96.9	114	97.4	97.2	2	7.09	0.00555	19.9698	46
ACANPAAGSVILLENLR	1xCarbamidomethyl [C2]; 1xTMT6plex [N-Term]	2.41902e-10	0	4	P00558	PGK1	Phosphoglycerate kinase 1 OS=Homo sapiens OX=9606 GN=PGK1 PE=1 SV=3	0	1998.1	95.6	109.2	95.8	102.6	100.6	96.3	2	2.15	0.00215	40.0164	91
ACAVEVK	1xCarbamidomethyl [C2]; 1xTMT6plex [K7]; 1xTMT6plex [N-Term]	0.0160431	0.00139738	1	Q8WX92	NELFB	Negative elongation factor B OS=Homo sapiens OX=9606 GN=NELFB PE=1 SV=1	0	1234.72	98.7	101.2	102.5	100.6	100.4	96.6	2	1.37	0.00085	14.0197	21
ACAVVFDCK	2xCarbamidomethyl [C2; C8]; 1xTMT6plex [K9]; 1xTMT6plex [N-Term]	0.00820743	0.000611155	1	P55042; P55040	RRAD; GEM	GTP-binding protein RAD OS=Homo sapiens OX=9606 GN=RRAD PE=1 SV=2;GTP-binding protein GEM OS=Homo sapiens OX=9606 GN=GEM PE=1 SV=1	0	1527.81	96.2	94.7	102.3	105.7	98.2	102.9	3	3.05	0.00155	23.7495	15
ACDELVEEMEHYGK	1xCarbamidomethyl [C2]; 1xTMT6plex [K14]; 1xTMT6plex [N-Term]	1.90031e-07	0	1	O00469	PLOD2	Procollagen-lysine,2-oxoglutarate 5-dioxygenase 2 OS=Homo sapiens OX=9606 GN=PLOD2 PE=1 SV=2	0	2168.04	80	83.6	83.5	131.4	110.5	111	3	2.49	0.0018	34.5958	54
ACDESFQPLGDIMK	1xCarbamidomethyl [C2]; 1xTMT6plex [K14]; 1xTMT6plex [N-Term]	8.06388e-05	2.77511e-05	2	Q6Y7W6	GIGYF2	GRB10-interacting GYF protein 2 OS=Homo sapiens OX=9606 GN=GIGYF2 PE=1 SV=1	0	2069.04	88.9	94.4	92.9	111.3	108.5	104	2	2.57	0.00266	38.0165	39
ACDESVLMDLK	1xCarbamidomethyl [C2]; 1xTMT6plex [K11]; 1xTMT6plex [N-Term]	6.99926e-05	2.77511e-05	1	Q9UJV9	DDX41	Probable ATP-dependent RNA helicase DDX41 OS=Homo sapiens OX=9606 GN=DDX41 PE=1 SV=2	0	1738.91	105.5	90.8	105	100.6	98.3	99.8	2	2.78	0.00242	33.9921	32
ACDILAIDK	1xCarbamidomethyl [C2]; 1xTMT6plex [K9]; 1xTMT6plex [N-Term]	9.34388e-05	2.77511e-05	1	O00273	DFFA	DNA fragmentation factor subunit alpha OS=Homo sapiens OX=9606 GN=DFFA PE=1 SV=1	0	1476.85	99.8	100.7	95.6	105.3	98.9	99.7	2	4.32	0.00319	29.6749	47
ACDLPAWVHFPDTER	1xCarbamidomethyl [C2]; 1xTMT6plex [N-Term]	7.69579e-06	0	1	A0FGR8	ESYT2	Extended synaptotagmin-2 OS=Homo sapiens OX=9606 GN=ESYT2 PE=1 SV=1	0	2043							3	5.39	0.00367	35.8611	15
ACDSVTSNVLPLLLEQFHK	1xCarbamidomethyl [C2]; 1xTMT6plex [K19]; 1xTMT6plex [N-Term]	7.41986e-07	0	2	Q96T76	MMS19	MMS19 nucleotide excision repair protein homolog OS=Homo sapiens OX=9606 GN=MMS19 PE=1 SV=2	0	2629.44	90.1	104.4	118.6	80.7	106.8	99.2	3	3.8	0.00333	50.1976	56
ACDYIQELR	1xCarbamidomethyl [C2]; 1xTMT6plex [N-Term]	0.000363326	3.92285e-05	1	P22415	USF1	Upstream stimulatory factor 1 OS=Homo sapiens OX=9606 GN=USF1 PE=1 SV=1	0	1396.71							2	2.4	0.00168	25.4077	16
ACEAITVGK	1xCarbamidomethyl [C2]; 1xTMT6plex [K9]; 1xTMT6plex [N-Term]	0.000438166	3.92285e-05	1	P36915	GNL1	Guanine nucleotide-binding protein-like 1 OS=Homo sapiens OX=9606 GN=GNL1 PE=1 SV=2	0	1406.81							2	3.06	0.00215	18.1467	16
ACEFAGFQCQIQFGPHNEQK	2xCarbamidomethyl [C2; C9]; 1xTMT6plex [K20]; 1xTMT6plex [N-Term]	2.60008e-09	0	3	Q9Y490	TLN1	Talin-1 OS=Homo sapiens OX=9606 GN=TLN1 PE=1 SV=3	0	2854.38	94	96.5	95.5	104.8	106.8	102.5	3	0.09	8e-05	31.3873	86
ACEPGVDYVYK	1xCarbamidomethyl [C2]; 1xTMT6plex [K11]; 1xTMT6plex [N-Term]	9.60676e-06	0	2	P01024	C3	Complement C3 OS=Homo sapiens OX=9606 GN=C3 PE=1 SV=2	0	1758.91	89.6	103.4	92.5	98.2	115.9	100.3	2	1.91	0.00168	24.349	39
ACFHCETCK	3xCarbamidomethyl [C2; C5; C8]; 1xTMT6plex [K9]; 1xTMT6plex [N-Term]	0.000235553	2.77511e-05	4	Q14847	LASP1	LIM and SH3 domain protein 1 OS=Homo sapiens OX=9606 GN=LASP1 PE=1 SV=2	0	1670.79	98.8	107.1	102.4	95.4	99.2	97.1	2	0.22	0.00018	11.0509	39
ACFQVGTSEEMK	1xCarbamidomethyl [C2]; 1xTMT6plex [K12]; 1xTMT6plex [N-Term]	1.57095e-06	0	1	P35658	NUP214	Nuclear pore complex protein Nup214 OS=Homo sapiens OX=9606 GN=NUP214 PE=1 SV=2	0	1844.93	104.8	99.9	101	94.9	96.4	103	2	1.63	0.00151	23.9307	48
ACFTMDPK	1xCarbamidomethyl [C2]; 1xTMT6plex [K8]; 1xTMT6plex [N-Term]	0.00501676	0.000395322	2	P26640	VARS	Valine--tRNA ligase OS=Homo sapiens OX=9606 GN=VARS PE=1 SV=4	0	1427.74	107	103.5	102.3	93.8	94.8	98.7	3	4.17	0.00198	22.9384	23
ACFVGLIESPEGTEELK	1xCarbamidomethyl [C2]; 1xTMT6plex [K17]; 1xTMT6plex [N-Term]	6.44978e-06	0	1	O75448	MED24	Mediator of RNA polymerase II transcription subunit 24 OS=Homo sapiens OX=9606 GN=MED24 PE=1 SV=1	0	2337.24	107.8	105	101.7	90	96.5	99	3	2.54	0.00198	40.8339	32
ACFVHTGVYNLGTPR	1xCarbamidomethyl [C2]; 1xTMT6plex [N-Term]	0.0089925	0.000658429	1	Q9Y2L5	TRAPPC8	Trafficking protein particle complex subunit 8 OS=Homo sapiens OX=9606 GN=TRAPPC8 PE=1 SV=2	0	1921							3	1.04	0.00067	22.5818	1
ACFYNLDK	1xCarbamidomethyl [C2]; 1xTMT6plex [K8]; 1xTMT6plex [N-Term]	0.00126808	0.000142151	1	Q96I25	RBM17	Splicing factor 45 OS=Homo sapiens OX=9606 GN=RBM17 PE=1 SV=1	0	1488.79	102.9	100	103.4	96.9	102.3	94.5	2	2.09	0.00155	26.898	31
ACGADSYEMEEDGVRK	1xCarbamidomethyl [C2]; 1xTMT6plex [K16]; 1xTMT6plex [N-Term]	3.47654e-05	0	1	P00533	EGFR	Epidermal growth factor receptor OS=Homo sapiens OX=9606 GN=EGFR PE=1 SV=2	1	2275.07							3	1.38	0.00104	17.6554	13
ACGDSTLTQITAGLDPVGR	1xCarbamidomethyl [C2]; 1xTMT6plex [N-Term]	4.7897e-10	0	2	P62879	GNB2	Guanine nucleotide-binding protein G(I)/G(S)/G(T) subunit beta-2 OS=Homo sapiens OX=9606 GN=GNB2 PE=1 SV=3	0	2161.11	98.1	93.7	93.6	104.3	104.4	105.9	2	4.32	0.00467	38.0539	82
ACGDVLVTAELILR	1xCarbamidomethyl [C2]; 1xTMT6plex [N-Term]	3.20506e-06	0	1	Q9NZM1	MYOF	Myoferlin OS=Homo sapiens OX=9606 GN=MYOF PE=1 SV=1	0	1759	96.4	99.6	94.3	102.3	111.2	96.1	2	3.3	0.0029	48.3265	32
ACGEAHLK	1xCarbamidomethyl [C2]; 1xTMT6plex [K8]; 1xTMT6plex [N-Term]	0.0185196	0.00160024	1	Q9Y315	DERA	Deoxyribose-phosphate aldolase OS=Homo sapiens OX=9606 GN=DERA PE=1 SV=2	0	1343.75							3	2.59	0.00116	9.6727	12
ACGLNFADLMAR	1xCarbamidomethyl [C2]; 1xTMT6plex [N-Term]	1.91163e-06	0	3	Q99536	VAT1	Synaptic vesicle membrane protein VAT-1 homolog OS=Homo sapiens OX=9606 GN=VAT1 PE=1 SV=2	0	1567.79	90.7	97.3	99.1	102.8	103.1	107.1	2	1.82	0.00143	38.1884	55
ACGLNFADLMAR	1xCarbamidomethyl [C2]; 1xOxidation [M10]; 1xTMT6plex [N-Term]	0.0298368	0.00203103	1	Q99536	VAT1	Synaptic vesicle membrane protein VAT-1 homolog OS=Homo sapiens OX=9606 GN=VAT1 PE=1 SV=2	0	1583.79	97.8	93.8	96.5	109.6	104.3	97.9	2	4.55	0.0036	30.5573	18
ACGLVASNLNLKPGECLR	1xAcetyl [N-Term]; 2xCarbamidomethyl [C2; C16]; 1xTMT6plex [K12]; 1xTMT6plex [N-Term]	3.79566e-05	0	5	P09382	LGALS1	Galectin-1 OS=Homo sapiens OX=9606 GN=LGALS1 PE=1 SV=2	0	2472.35	83.3	95.3	85.2	115.8	112.2	108.2	2	-92687.8	-114.578	35.03	55
ACGNFGIPCELR	2xCarbamidomethyl [C2; C9]; 1xTMT6plex [N-Term]	5.21504e-06	0	2	P22234	PAICS	Multifunctional protein ADE2 OS=Homo sapiens OX=9606 GN=PAICS PE=1 SV=3	0	1622.8	104.1	97.6	104.5	95.6	94.4	103.8	3	3.13	0.0017	28.0665	40
ACGSEIMQK	1xCarbamidomethyl [C2]; 1xTMT6plex [K9]; 1xTMT6plex [N-Term]	0.00131755	0.000142151	1	P15924	DSP	Desmoplakin OS=Homo sapiens OX=9606 GN=DSP PE=1 SV=3	0	1481.79	103.2	92.3	103.3	108.4	92.8	100	2	8.44	0.00625	16.5993	32
ACGVDYEVK	1xCarbamidomethyl [C2]; 1xTMT6plex [K9]; 1xTMT6plex [N-Term]	0.000130044	2.77511e-05	1	P49407	ARRB1	Beta-arrestin-1 OS=Homo sapiens OX=9606 GN=ARRB1 PE=1 SV=2	0	1498.8	102.5	113.5	96.9	94.5	97.3	95.2	2	2.57	0.00193	18.9675	38
ACIDSNEDGDLSK	1xCarbamidomethyl [C2]; 1xTMT6plex [K13]; 1xTMT6plex [N-Term]	3.52761e-07	0	1	P29144	TPP2	Tripeptidyl-peptidase 2 OS=Homo sapiens OX=9606 GN=TPP2 PE=1 SV=4	0	1881.93	105.8	104.8	93.1	95.5	104.1	96.7	2	0.52	0.00049	19.2867	50
ACLDTAVENMPSLK	1xCarbamidomethyl [C2]; 1xTMT6plex [K14]; 1xTMT6plex [N-Term]	5.02409e-08	0	2	P49327	FASN	Fatty acid synthase OS=Homo sapiens OX=9606 GN=FASN PE=1 SV=3	0	2007.07	101.3	107.3	106.3	93.3	95.8	96	2	2.48	0.00249	35.2933	91
ACLDYPVTSVLPPASLCK	2xCarbamidomethyl [C2; C17]; 1xTMT6plex [K18]; 1xTMT6plex [N-Term]	2.95012e-07	0	5	P53801	PTTG1IP	Pituitary tumor-transforming gene 1 protein-interacting protein OS=Homo sapiens OX=9606 GN=PTTG1IP PE=1 SV=1	0	2449.32	88.6	92.2	97.3	114.5	107.8	99.6	2	4.89	0.00599	40.9222	69
ACLFVPSIDVLNQNTLR	1xCarbamidomethyl [C2]; 1xTMT6plex [N-Term]	2.47646e-05	0	2	Q93063	EXT2	Exostosin-2 OS=Homo sapiens OX=9606 GN=EXT2 PE=1 SV=1	0	2189.19	103.5	98.3	102.7	100.7	94.9	100	3	5.04	0.00368	46.3523	46
ACLGCMGAGPGR	2xCarbamidomethyl [C2; C5]; 1xTMT6plex [N-Term]	0.000212168	2.77511e-05	1	Q96HD1	CRELD1	Protein disulfide isomerase CRELD1 OS=Homo sapiens OX=9606 GN=CRELD1 PE=1 SV=3	0	1435.68	96	89.5	90.8	112.8	98.7	112.1	2	4.77	0.00342	16.772	17
ACIGDTLCQK	2xCarbamidomethyl [C2; C8]; 1xTMT6plex [K10]; 1xTMT6plex [N-Term]	0.00234957	0.000201691	1	A0AVT1	UBA6	Ubiquitin-like modifier-activating enzyme 6 OS=Homo sapiens OX=9606 GN=UBA6 PE=1 SV=1	0	1623.86	98.8	106.6	99	90.6	101.8	103.3	3	1.22	0.00066	21.1652	21
ACLIFFDEIDAIGGAR	1xCarbamidomethyl [C2]; 1xTMT6plex [N-Term]	4.11385e-07	0	3	P35998	PSMC2	26S proteasome regulatory subunit 7 OS=Homo sapiens OX=9606 GN=PSMC2 PE=1 SV=3	0	1997.04	98.8	96.5	101.4	98.6	103.2	101.5	3	4.82	0.00321	52.2498	63
ACLISLGYDIGNDPQGEAEFAR	1xCarbamidomethyl [C2]; 1xTMT6plex [N-Term]	1.24538e-08	0	4	P12814	ACTN1	Alpha-actinin-1 OS=Homo sapiens OX=9606 GN=ACTN1 PE=1 SV=2	0	2625.28	99.1	96.9	96.5	102.5	103.4	101.6	3	0.54	0.00047	43.0792	85
ACLISLGYDVENDR	1xCarbamidomethyl [C2]; 1xTMT6plex [N-Term]	3.69545e-07	0	4	O43707	ACTN4	Alpha-actinin-4 OS=Homo sapiens OX=9606 GN=ACTN4 PE=1 SV=2	0	1853.93	96.6	101	98.5	98.4	99.4	106	3	3.49	0.00216	36.3578	59
ACLISLGYDVENDRQGEAEFNR	1xCarbamidomethyl [C2]; 1xTMT6plex [N-Term]	1.66628e-05	0	1	O43707	ACTN4	Alpha-actinin-4 OS=Homo sapiens OX=9606 GN=ACTN4 PE=1 SV=2	1	2785.34							3	3.73	0.00346	34.5805	23
ACLNFLK	1xCarbamidomethyl [C2]; 1xTMT6plex [K7]; 1xTMT6plex [N-Term]	0.0126042	0.0010539	1	Q8WUA2	PPIL4	Peptidyl-prolyl cis-trans isomerase-like 4 OS=Homo sapiens OX=9606 GN=PPIL4 PE=1 SV=1	0	1323.79							2	2.79	0.00185	30.5917	13
ACLPDAK	1xCarbamidomethyl [C2]; 1xTMT6plex [K7]; 1xTMT6plex [N-Term]	0.0342197	0.00217638	1	O15091	PRORP	Mitochondrial ribonuclease P catalytic subunit OS=Homo sapiens OX=9606 GN=PRORP PE=1 SV=2	0	1232.71	105	93.4	98.9	99	97.6	106.1	2	-0.59	-0.00036	16.0841	15
ACIPVGLLGK	1xCarbamidomethyl [C2]; 1xTMT6plex [K10]; 1xTMT6plex [N-Term]	3.19188e-05	0	2	Q96GQ7	DDX27	Probable ATP-dependent RNA helicase DDX27 OS=Homo sapiens OX=9606 GN=DDX27 PE=1 SV=2	0	1485.92	112.5	105.4	113	87.3	88.5	93.4	2	2.66	0.00198	34.7321	48
ACLQPSQDPQMR	1xCarbamidomethyl [C2]; 1xTMT6plex [N-Term]	6.93523e-05	2.77511e-05	1	Q86Y56	DNAAF5	Dynein assembly factor 5, axonemal OS=Homo sapiens OX=9606 GN=DNAAF5 PE=1 SV=4	0	1659.81	102.7	93.8	96.6	104.6	102	100.5	2	1.66	0.00138	14.7699	43
ACLQQDLK	1xCarbamidomethyl [C2]; 1xTMT6plex [K8]; 1xTMT6plex [N-Term]	0.00206994	0.000201691	1	Q86WJ1	CHD1L	Chromodomain-helicase-DNA-binding protein 1-like OS=Homo sapiens OX=9606 GN=CHD1L PE=1 SV=3	0	1433.82	101.5	99.5	100.2	102.1	98.1	98.6	2	2.55	0.00183	19.1919	33
ACLSALSEVK	1xCarbamidomethyl [C2]; 1xTMT6plex [K10]; 1xTMT6plex [N-Term]	2.33813e-05	0	1	P42356	PI4KA	Phosphatidylinositol 4-kinase alpha OS=Homo sapiens OX=9606 GN=PI4KA PE=1 SV=4	0	1535.89	90.5	92.6	93.3	108.2	100.3	115.2	2	1.85	0.00142	27.9262	60
ACISFNK	1xCarbamidomethyl [C2]; 1xTMT6plex [K7]; 1xTMT6plex [N-Term]	0.0174099	0.00150314	1	Q6PD62	CTR9	RNA polymerase-associated protein CTR9 homolog OS=Homo sapiens OX=9606 GN=CTR9 PE=1 SV=1	0	1297.73	99.6	108	102.9	94.5	98.5	96.5	2	2.59	0.00168	21.9063	13
ACLVHNELLEK	1xCarbamidomethyl [C2]; 1xTMT6plex [K11]; 1xTMT6plex [N-Term]	0.0190261	0.00162509	1	Q9UK61	TASOR	Protein TASOR OS=Homo sapiens OX=9606 GN=TASOR PE=1 SV=3	0	1784.01	101.9	96.5	98.9	98.8	98.4	105.5	3	2.71	0.00161	23.3181	31
ACMLTTATAHDGDVNVISWSR	1xCarbamidomethyl [C2]; 1xTMT6plex [N-Term]	2.0993e-08	0	1	Q9BQ67	GRWD1	Glutamate-rich WD repeat-containing protein 1 OS=Homo sapiens OX=9606 GN=GRWD1 PE=1 SV=1	0	2534.23	104.8	98.7	104.6	97.3	98	96.6	3	-3.02	-0.00255	32.5576	52
ACNAIEDAQSTR	1xCarbamidomethyl [C2]; 1xTMT6plex [N-Term]	2.0167e-06	0	1	Q709C8	VPS13C	Vacuolar protein sorting-associated protein 13C OS=Homo sapiens OX=9606 GN=VPS13C PE=1 SV=1	0	1564.76	90.8	93.1	83.8	115.2	107.9	109.1	2	0.72	0.00056	13.4988	51
ACNCLLLK	2xCarbamidomethyl [C2; C4]; 1xTMT6plex [K8]; 1xTMT6plex [N-Term]	0.00204922	0.000201691	1	P09104	ENO2	Gamma-enolase OS=Homo sapiens OX=9606 GN=ENO2 PE=1 SV=3	0	1449.83	77	79.1	75.4	128.1	118.9	121.6	2	5.98	0.00433	24.7662	21
ACNDATLVQITSNMDSVGR	1xCarbamidomethyl [C2]; 1xTMT6plex [N-Term]	3.09297e-06	0	1	Q9HAV0	GNB4	Guanine nucleotide-binding protein subunit beta-4 OS=Homo sapiens OX=9606 GN=GNB4 PE=1 SV=3	0	2281.11	103.9	101.1	100.1	93.2	103.7	97.9	3	0.33	0.00025	35.2916	40
ACNLTDTQK	1xCarbamidomethyl [C2]; 1xTMT6plex [K9]; 1xTMT6plex [N-Term]	0.000164086	2.77511e-05	1	Q7LBC6	KDM3B	Lysine-specific demethylase 3B OS=Homo sapiens OX=9606 GN=KDM3B PE=1 SV=2	0	1508.81	111.6	99.7	110.3	97.2	89.3	91.9	2	1.59	0.0012	13.8852	37
ACNQLGQFLQHR	1xCarbamidomethyl [C2]; 1xTMT6plex [N-Term]	1.71145e-06	0	2	O95782; O94973	AP2A1; AP2A2	AP-2 complex subunit alpha-1 OS=Homo sapiens OX=9606 GN=AP2A1 PE=1 SV=3;AP-2 complex subunit alpha-2 OS=Homo sapiens OX=9606 GN=AP2A2 PE=1 SV=2	0	1700.89	93.3	103.1	94	100.6	107	102	2	1.77	0.0015	22.3301	49
ACPEHSAPIK	1xCarbamidomethyl [C2]; 1xTMT6plex [K10]; 1xTMT6plex [N-Term]	0.000281592	2.77511e-05	1	Q9NRA2	SLC17A5	Sialin OS=Homo sapiens OX=9606 GN=SLC17A5 PE=1 SV=2	0	1567.87	88.1	98.8	87.3	113.3	107.4	105	3	1.79	0.00094	9.9115	23
ACPHVWFER	1xCarbamidomethyl [C2]; 1xTMT6plex [N-Term]	0.000369792	3.92285e-05	2	Q86UL3; Q53EU6	GPAT4; GPAT3	Glycerol-3-phosphate acyltransferase 4 OS=Homo sapiens OX=9606 GN=GPAT4 PE=1 SV=1;Glycerol-3-phosphate acyltransferase 3 OS=Homo sapiens OX=9606 GN=GPAT3 PE=1 SV=2	0	1430.72	100.6	100.8	98.7	98.8	100.2	100.9	3	3.74	0.00178	19.5219	21
ACPLDQAIGLLVAIFHK	1xAcetyl [N-Term]; 1xCarbamidomethyl [C2]; 1xTMT6plex [K17]; 1xTMT6plex [N-Term]	0.0044559	0.000335057	1	P06703	S100A6	Protein S100-A6 OS=Homo sapiens OX=9606 GN=S100A6 PE=1 SV=1	0	2366.37	90	154.8	109.1	88.4	59.9	97.9	3	-96837.6	-76.3845	55.2665	42
ACPPGTAACLVR	2xCarbamidomethyl [C2; C9]; 1xTMT6plex [N-Term]	6.15408e-05	1.80381e-05	1	P11717	IGF2R	Cation-independent mannose-6-phosphate receptor OS=Homo sapiens OX=9606 GN=IGF2R PE=1 SV=3	0	1501.78	102.6	92.3	98.4	104.5	97.3	104.9	2	0.24	0.00018	16.5578	25
ACPRPEGLNFQDLK	1xCarbamidomethyl [C2]; 1xTMT6plex [K14]; 1xTMT6plex [N-Term]	3.36449e-05	0	2	P15927	RPA2	Replication protein A 32 kDa subunit OS=Homo sapiens OX=9606 GN=RPA2 PE=1 SV=1	0	2103.14	106.4	98.9	100	95.7	100.2	98.8	2	2.33	0.00245	26.158	30
ACQALGAMLSK	1xCarbamidomethyl [C2]; 1xTMT6plex [K11]; 1xTMT6plex [N-Term]	5.82061e-06	0	2	Q8IXH7	NELFCD	Negative elongation factor C/D OS=Homo sapiens OX=9606 GN=NELFCD PE=1 SV=2	0	1607.9	103.3	101.8	103.5	100.3	96.5	94.7	2	5.44	0.00437	31.8651	69
ACQEQIEAALR	1xCarbamidomethyl [C2]; 1xTMT6plex [N-Term]	2.98733e-05	0	1	P30281	CCND3	G1/S-specific cyclin-D3 OS=Homo sapiens OX=9606 GN=CCND3 PE=1 SV=2	0	1517.79	83.1	97.6	113	93.2	106.6	106.6	2	3.95	0.003	22.0941	25
ACQEQIEALLESSLR	1xCarbamidomethyl [C2]; 1xTMT6plex [N-Term]	1.47949e-07	0	1	P24385	CCND1	G1/S-specific cyclin-D1 OS=Homo sapiens OX=9606 GN=CCND1 PE=1 SV=1	0	1976.03	108.7	95.6	102.9	97	94.9	100.9	2	5.63	0.00557	46.1369	59
ACQFLIK	1xCarbamidomethyl [C2]; 1xTMT6plex [K7]; 1xTMT6plex [N-Term]	0.0148714	0.00126079	1	P19447	ERCC3	General transcription and DNA repair factor IIH helicase subunit XPB OS=Homo sapiens OX=9606 GN=ERCC3 PE=1 SV=1	0	1337.8	100.5	98.2	100.4	98.5	106	96.4	2	4.84	0.00324	26.9459	19
ACQIFVR	1xCarbamidomethyl [C2]; 1xTMT6plex [N-Term]	0.0112819	0.000925297	1	P52272	HNRNPM	Heterogeneous nuclear ribonucleoprotein M OS=Homo sapiens OX=9606 GN=HNRNPM PE=1 SV=3	0	1122.63							2	3.88	0.00218	18.2754	19
ACQIIASILVGKDEK	1xCarbamidomethyl [C2]; 2xTMT6plex [K12; K15]; 1xTMT6plex [N-Term]	2.7576e-05	0	1	O14802	POLR3A	DNA-directed RNA polymerase III subunit RPC1 OS=Homo sapiens OX=9606 GN=POLR3A PE=1 SV=2	1	2332.39							3	3.07	0.00239	42.1535	17
ACQLSVVVDDKK	1xCarbamidomethyl [C2]; 2xTMT6plex [K11; K12]; 1xTMT6plex [N-Term]	1.69527e-05	0	1	P26358	DNMT1	DNA (cytosine-5)-methyltransferase 1 OS=Homo sapiens OX=9606 GN=DNMT1 PE=1 SV=2	1	2049.2							3	4.63	0.00316	23.0224	12
ACQNYLK	1xCarbamidomethyl [C2]; 1xTMT6plex [K7]; 1xTMT6plex [N-Term]	0.0253138	0.00185875	1	Q9UKL6	PCTP	Phosphatidylcholine transfer protein OS=Homo sapiens OX=9606 GN=PCTP PE=1 SV=1	0	1354.76	85.8	93.4	93.6	112.3	110.4	104.6	2	4.57	0.0031	15.7369	1
ACQQLDVQK	1xCarbamidomethyl [C2]; 1xTMT6plex [K9]; 1xTMT6plex [N-Term]	0.000420774	3.92285e-05	1	Q8N954	GPATCH11	G patch domain-containing protein 11 OS=Homo sapiens OX=9606 GN=GPATCH11 PE=1 SV=4	0	1547.86	100.4	104.9	106.9	92.4	101.4	93.9	2	0.42	0.00032	16.0937	31
ACQSIYPLHDVFVR	1xCarbamidomethyl [C2]; 1xTMT6plex [N-Term]	2.83232e-05	0	1	P61247	RPS3A	40S ribosomal protein S3a OS=Homo sapiens OX=9606 GN=RPS3A PE=1 SV=2	0	1934.02	94.5	88.1	94.4	112.1	108.7	102.2	3	-0.55	-0.00036	28.9232	32
ACQVALDEIK	1xCarbamidomethyl [C2]; 1xTMT6plex [K10]; 1xTMT6plex [N-Term]	2.56134e-05	0	1	Q9Y6D5	ARFGEF2	Brefeldin A-inhibited guanine nucleotide-exchange protein 2 OS=Homo sapiens OX=9606 GN=ARFGEF2 PE=1 SV=3	0	1604.91	99.5	96	94.5	105.2	104.4	100.5	2	0.18	0.00015	25.5717	58
ACQVALDEIKAEIEK	1xCarbamidomethyl [C2]; 2xTMT6plex [K10; K15]; 1xTMT6plex [N-Term]	4.0223e-05	0	1	Q9Y6D5	ARFGEF2	Brefeldin A-inhibited guanine nucleotide-exchange protein 2 OS=Homo sapiens OX=9606 GN=ARFGEF2 PE=1 SV=3	1	2404.37	88.7	89.4	89.1	116.2	111.9	104.5	3	0.79	0.00063	40.5723	19
ACQVCSTWIGSGVVSDLNDLR	2xCarbamidomethyl [C2; C5]; 1xTMT6plex [N-Term]	1.26231e-05	0	1	Q9P2D3	HEATR5B	HEAT repeat-containing protein 5B OS=Homo sapiens OX=9606 GN=HEATR5B PE=1 SV=2	0	2566.26	107.7	90.1	96	106.9	99.5	99.8	3	3.02	0.00259	44.7802	26
ACSAIHAVNLR	1xCarbamidomethyl [C2]; 1xTMT6plex [N-Term]	0.0012382	0.000132543	1	Q13045	FLII	Protein flightless-1 homolog OS=Homo sapiens OX=9606 GN=FLII PE=1 SV=2	0	1440.79	100	103.2	101.8	95.6	91.7	107.8	2	4.12	0.00297	14.2187	14
ACSLLGK	1xCarbamidomethyl [C2]; 1xTMT6plex [K7]; 1xTMT6plex [N-Term]	0.0140296	0.00116958	1	Q6PI48	DARS2	Aspartate--tRNA ligase, mitochondrial OS=Homo sapiens OX=9606 GN=DARS2 PE=1 SV=1	0	1206.73	98.8	93.4	92.4	110.7	101.9	102.8	2	1.03	0.00062	21.446	22
ACSPAASEITGLSTAVLAAHGR	1xCarbamidomethyl [C2]; 1xTMT6plex [N-Term]	1.42152e-06	0	1	Q9NSU2	TREX1	Three-prime repair exonuclease 1 OS=Homo sapiens OX=9606 GN=TREX1 PE=1 SV=2	0	2369.24	99.9	103.7	96.8	102.7	95.4	101.6	3	5.03	0.00397	34.5337	31
ACSTPPGPQTVLIFDELSDSLCR	2xCarbamidomethyl [C2; C22]; 1xTMT6plex [N-Term]	1.52299e-05	0	1	Q99797	MIPEP	Mitochondrial intermediate peptidase OS=Homo sapiens OX=9606 GN=MIPEP PE=1 SV=2	0	2792.38	107.8	102.6	96.7	96.3	95.4	101.1	3	-1.91	-0.00178	51.5878	42
ACTAQSLGNLLDMMYR	1xCarbamidomethyl [C2]; 1xTMT6plex [N-Term]	1.2935e-05	0	1	Q16854	DGUOK	Deoxyguanosine kinase, mitochondrial OS=Homo sapiens OX=9606 GN=DGUOK PE=1 SV=2	0	2073.01							3	4.73	0.00327	49.2325	20
ACTILLR	1xCarbamidomethyl [C2]; 1xTMT6plex [N-Term]	0.0107363	0.000859218	1	P49368	CCT3	T-complex protein 1 subunit gamma OS=Homo sapiens OX=9606 GN=CCT3 PE=1 SV=4	0	1075.65	114.7	103.1	110.4	82.3	94.4	95.2	2	2.33	0.00125	20.4105	39
ACTQLVDNLVEHILK	1xCarbamidomethyl [C2]; 1xTMT6plex [K15]; 1xTMT6plex [N-Term]	1.48905e-06	0	1	Q6KC79	NIPBL	Nipped-B-like protein OS=Homo sapiens OX=9606 GN=NIPBL PE=1 SV=2	0	2211.26	98.3	103.3	103.2	99	95.5	100.7	3	5.09	0.00375	48.9331	54
ACTTEEDQEK	1xCarbamidomethyl [C2]; 1xTMT6plex [K10]; 1xTMT6plex [N-Term]	3.27717e-05	0	2	P49915	GMPS	GMP synthase [glutamine-hydrolyzing] OS=Homo sapiens OX=9606 GN=GMPS PE=1 SV=1	0	1668.82	104.1	104	102.9	93.3	96.2	99.5	2	0.67	0.00056	9.8142	41
ACVEAPK	1xCarbamidomethyl [C2]; 1xTMT6plex [K7]; 1xTMT6plex [N-Term]	0.0113752	0.000965224	2	O15067	PFAS	Phosphoribosylformylglycinamidine synthase OS=Homo sapiens OX=9606 GN=PFAS PE=1 SV=4	0	1232.71	109.4	115.2	103.8	85.6	94	92	2	1.89	0.00116	12.1061	21
ACVMMQGR	1xCarbamidomethyl [C2]; 1xTMT6plex [N-Term]	0.00213352	0.000201691	1	P00491	PNP	Purine nucleoside phosphorylase OS=Homo sapiens OX=9606 GN=PNP PE=1 SV=2	0	1181.58	96.9	93.1	91.1	101.1	108.7	109.1	2	2.03	0.0012	13.9068	31
ACVQVLDPK	1xCarbamidomethyl [C2]; 1xTMT6plex [K9]; 1xTMT6plex [N-Term]	0.0926899	0.00403525	1	Q9BWS9	CHID1	Chitinase domain-containing protein 1 OS=Homo sapiens OX=9606 GN=CHID1 PE=1 SV=1	0	1487.87	109.1	110.2	101.7	105	93.2	80.9	2	-6.21	-0.00462	21.8977	4
ACVVHGSDLK	1xCarbamidomethyl [C2]; 1xTMT6plex [K10]; 1xTMT6plex [N-Term]	2.27556e-05	0	2	P50993; P05023	ATP1A2; ATP1A1	Sodium/potassium-transporting ATPase subunit alpha-2 OS=Homo sapiens OX=9606 GN=ATP1A2 PE=1 SV=1;Sodium/potassium-transporting ATPase subunit alpha-1 OS=Homo sapiens OX=9606 GN=ATP1A1 PE=1 SV=1	0	1543.87	101	104.7	97.8	97.7	103.1	95.7	2	2.98	0.0023	12.5619	44
ACWVLHYFCEVK	2xCarbamidomethyl [C2; C9]; 1xTMT6plex [K12]; 1xTMT6plex [N-Term]	1.77293e-05	0	2	O95373	IPO7	Importin-7 OS=Homo sapiens OX=9606 GN=IPO7 PE=1 SV=1	0	2070.07	108.7	134.7	114.1	78.3	84.2	80.1	3	2.71	0.00187	41.4662	47
ACYALENFVENLGPK	1xCarbamidomethyl [C2]; 1xTMT6plex [K15]; 1xTMT6plex [N-Term]	2.16581e-06	0	3	Q8TEX9	IPO4	Importin-4 OS=Homo sapiens OX=9606 GN=IPO4 PE=1 SV=2	0	2183.16	101.1	123.8	111.7	85.7	88.1	89.6	2	5.45	0.00595	48.6993	82
ACYGVLR	1xCarbamidomethyl [C2]; 1xTMT6plex [N-Term]	0.0132961	0.0010788	2	P23396	RPS3	40S ribosomal protein S3 OS=Homo sapiens OX=9606 GN=RPS3 PE=1 SV=2	0	1067.59	102.1	103.9	102.2	98	98.9	95	2	2.67	0.00143	15.2938	28
ACYLSINPQK	1xCarbamidomethyl [C2]; 1xTMT6plex [K10]; 1xTMT6plex [N-Term]	0.000143978	2.77511e-05	2	P61163; P42025	ACTR1A; ACTR1B	Alpha-centractin OS=Homo sapiens OX=9606 GN=ACTR1A PE=1 SV=1;Beta-centractin OS=Homo sapiens OX=9606 GN=ACTR1B PE=1 SV=1	0	1651.92	103.1	100.8	94.2	105.3	100.4	96.1	2	4.1	0.00339	25.2758	44
ACYLSINPQKDEALETEK	1xCarbamidomethyl [C2]; 2xTMT6plex [K10; K18]; 1xTMT6plex [N-Term]	1.96697e-06	0	1	P42025	ACTR1B	Beta-centractin OS=Homo sapiens OX=9606 GN=ACTR1B PE=1 SV=1	1	2796.51	139.5	137.4	119.7	66.4	70.2	66.7	3	-0.44	-0.00041	29.3321	44
ACYLSINPQKDETLETEK	1xCarbamidomethyl [C2]; 2xTMT6plex [K10; K18]; 1xTMT6plex [N-Term]	3.104e-06	0	2	P61163	ACTR1A	Alpha-centractin OS=Homo sapiens OX=9606 GN=ACTR1A PE=1 SV=1	1	2826.52	87	95.6	88	115.7	114	99.7	3	2.05	0.00193	28.7397	36
ADAAEFWR	1xTMT6plex [N-Term]	0.0025241	0.000201691	1	P22681	CBL	E3 ubiquitin-protein ligase CBL OS=Homo sapiens OX=9606 GN=CBL PE=1 SV=2	0	1194.61	90.4	90.4	96	109.6	106.1	107.6	2	1.97	0.00118	26.9952	22
ADAASQVLLGSGLTILSQPLMYVK	1xAcetyl [N-Term]; 1xTMT6plex [K24]; 1xTMT6plex [N-Term]	8.3702e-05	2.77511e-05	3	Q9Y6C9	MTCH2	Mitochondrial carrier homolog 2 OS=Homo sapiens OX=9606 GN=MTCH2 PE=1 SV=1	0	2975.69	95.2	108	98.8	99.6	102.3	96.2	3	-77007.1	-76.3831	55.6175	91
ADAASQVLLGSGLTILSQPLMYVK	1xAcetyl [N-Term]; 1xOxidation [M21]; 1xTMT6plex [K24]; 1xTMT6plex [N-Term]	0.000119803	2.77511e-05	1	Q9Y6C9	MTCH2	Mitochondrial carrier homolog 2 OS=Homo sapiens OX=9606 GN=MTCH2 PE=1 SV=1	0	2991.68	93.3	113.1	88.2	107.2	102.3	95.9	3	-76596.4	-76.3841	55.6188	90
ADAASSLTVDVTPPTAK	1xTMT6plex [K17]; 1xTMT6plex [N-Term]	6.07397e-07	0	1	Q9H8Y8	GORASP2	Golgi reassembly-stacking protein 2 OS=Homo sapiens OX=9606 GN=GORASP2 PE=1 SV=3	0	2102.17	99.8	101.9	104	94.7	101.7	97.8	3	2.45	0.00171	29.0953	52
ADADTVLLFLK	1xTMT6plex [K11]; 1xTMT6plex [N-Term]	6.22559e-06	0	3	Q9NZJ4	SACS	Sacsin OS=Homo sapiens OX=9606 GN=SACS PE=1 SV=2	0	1664	102.8	116.5	99.8	98.2	89.9	92.8	2	2.34	0.00195	49.0432	61
ADAEAVLAPPEPAQ	1xTMT6plex [N-Term]	0.00014245	2.77511e-05	1	Q8WZA9	IRGQ	Immunity-related GTPase family Q protein OS=Homo sapiens OX=9606 GN=IRGQ PE=1 SV=1	0	1607.85	96.5	112.8	101.2	96.6	96.9	95.9	2	1.68	0.00135	30.0532	39
ADAECYTAMK	1xCarbamidomethyl [C5]; 1xTMT6plex [K10]; 1xTMT6plex [N-Term]	3.00724e-05	0	1	O94905	ERLIN2	Erlin-2 OS=Homo sapiens OX=9606 GN=ERLIN2 PE=1 SV=1	0	1617.8	92.4	86.2	77.6	117.4	113.9	112.4	2	2.94	0.00238	20.3405	53
ADAEDLLDSFLSNILQDCR	1xCarbamidomethyl [C18]; 1xTMT6plex [N-Term]	4.30794e-08	0	2	Q96T76	MMS19	MMS19 nucleotide excision repair protein homolog OS=Homo sapiens OX=9606 GN=MMS19 PE=1 SV=2	0	2424.19	99.2	101.9	102	95.5	94.3	107.2	3	4.26	0.00345	55.5074	71
ADAEGESDLENSRK	1xTMT6plex [K14]; 1xTMT6plex [N-Term]	4.15821e-07	0	2	Q9Y490	TLN1	Talin-1 OS=Homo sapiens OX=9606 GN=TLN1 PE=1 SV=3	1	1979.01	94.3	90.3	89.7	108.9	112.5	104.3	2	1.69	0.00167	12.9123	64
ADAETLR	1xTMT6plex [N-Term]	0.0159074	0.00139738	1	P08758	ANXA5	Annexin A5 OS=Homo sapiens OX=9606 GN=ANXA5 PE=1 SV=2	0	1004.56	95.2	106.2	91.7	103	102.9	100.9	2	2.52	0.00127	10.4913	31
ADAETLRK	1xTMT6plex [K8]; 1xTMT6plex [N-Term]	0.149371	0.00533347	2	P08758	ANXA5	Annexin A5 OS=Homo sapiens OX=9606 GN=ANXA5 PE=1 SV=2	1	1361.82	97.2	93.1	91.3	106.8	102.6	109	3	2.64	0.0012	11.4609	9
ADAEVIILPK	1xAcetyl [N-Term]; 1xTMT6plex [K10]; 1xTMT6plex [N-Term]	0.0632134	0.00316109	1	O60832	DKC1	H/ACA ribonucleoprotein complex subunit DKC1 OS=Homo sapiens OX=9606 GN=DKC1 PE=1 SV=3	0	1568.97							2	-146052	-114.575	40.4444	19
ADAEYYAAHK	1xTMT6plex [K10]; 1xTMT6plex [N-Term]	1.7975e-05	0	1	O75477	ERLIN1	Erlin-1 OS=Homo sapiens OX=9606 GN=ERLIN1 PE=1 SV=2	0	1596.84	94.4	91.8	87.8	114.6	109.8	101.6	2	1.44	0.00115	15.5627	62
ADAGEKPK	2xTMT6plex [K6; K8]; 1xTMT6plex [N-Term]	0.0761116	0.00347982	1	P47897	QARS	Glutamine--tRNA ligase OS=Homo sapiens OX=9606 GN=QARS PE=1 SV=1	0	1502.91	92.5	94.2	89.1	100.8	113.4	110	2	1.25	0.00094	9.3836	10
ADAGKDGNNPAK	2xTMT6plex [K5; K12]; 1xTMT6plex [N-Term]	0.00809976	0.000602321	2	O00479	HMGN4	High mobility group nucleosome-binding domain-containing protein 4 OS=Homo sapiens OX=9606 GN=HMGN4 PE=1 SV=3	1	1845.04	92.6	98.6	101	97.1	92.4	118.2	3	2.6	0.0016	10.0002	3
ADALQAGASQFETSAAK	1xTMT6plex [K17]; 1xTMT6plex [N-Term]	2.59839e-10	0	2	Q15836; P63027	VAMP3; VAMP2	Vesicle-associated membrane protein 3 OS=Homo sapiens OX=9606 GN=VAMP3 PE=1 SV=3;Vesicle-associated membrane protein 2 OS=Homo sapiens OX=9606 GN=VAMP2 PE=1 SV=3	0	2124.13	97.1	92.7	91.9	108.4	109.2	100.7	2	2.24	0.00238	29.5034	98
ADALQLSVEEFVER	1xTMT6plex [N-Term]	9.52965e-08	0	2	Q6NYC1	JMJD6	Bifunctional arginine demethylase and lysyl-hydroxylase JMJD6 OS=Homo sapiens OX=9606 GN=JMJD6 PE=1 SV=1	0	1834.97	111.5	89.2	115.7	90.1	98	95.5	3	2.17	0.00133	47.0923	54
ADALYPVVSAASICAK	1xCarbamidomethyl [C14]; 1xTMT6plex [K16]; 1xTMT6plex [N-Term]	1.21483e-06	0	1	O75792	RNASEH2A	Ribonuclease H2 subunit A OS=Homo sapiens OX=9606 GN=RNASEH2A PE=1 SV=2	0	2094.17	94.5	108.6	105.5	93.7	101.1	96.7	3	3.25	0.00227	37.7806	48
ADATLIGK	1xTMT6plex [K8]; 1xTMT6plex [N-Term]	0.00204922	0.000201691	1	Q9C0D5	TANC1	Protein TANC1 OS=Homo sapiens OX=9606 GN=TANC1 PE=1 SV=3	0	1246.78	100.9	100.6	101.1	99.5	100.2	97.7	2	2.48	0.00155	21.4389	24
ADAVQDSEMVELVELEIR	1xTMT6plex [N-Term]	2.3174e-10	0	2	P49411	TUFM	Elongation factor Tu, mitochondrial OS=Homo sapiens OX=9606 GN=TUFM PE=1 SV=2	0	2275.17	99.2	99	99.1	100.3	98.5	103.8	2	6.59	0.0075	51.5478	87
ADAVWNK	1xTMT6plex [K7]; 1xTMT6plex [N-Term]	0.0129718	0.00107126	1	P42704	LRPPRC	Leucine-rich PPR motif-containing protein, mitochondrial OS=Homo sapiens OX=9606 GN=LRPPRC PE=1 SV=3	0	1261.73	106.1	98.8	96.6	101.4	104.3	92.8	2	2.24	0.00142	21.4874	24
ADCASGILLAAER	1xCarbamidomethyl [C3]; 1xTMT6plex [N-Term]	0.000310619	3.92285e-05	1	O75843	AP1G2	AP-1 complex subunit gamma-like 2 OS=Homo sapiens OX=9606 GN=AP1G2 PE=1 SV=1	0	1575.84							3	2.21	0.00116	28.7049	12
ADCILYYGFGDIFR	1xCarbamidomethyl [C3]; 1xTMT6plex [N-Term]	7.28846e-07	0	2	P46063	RECQL	ATP-dependent DNA helicase Q1 OS=Homo sapiens OX=9606 GN=RECQL PE=1 SV=3	0	1938.96	94.5	102.2	99	102.1	99.3	102.9	2	0.79	0.00077	52.3634	49
ADCLMGEFK	1xCarbamidomethyl [C3]; 1xTMT6plex [K9]; 1xTMT6plex [N-Term]	0.00153042	0.000164178	2	Q9NZM1	MYOF	Myoferlin OS=Homo sapiens OX=9606 GN=MYOF PE=1 SV=1	0	1528.79	91.9	91.2	88	110.2	111.3	107.6	3	3.52	0.0018	32.1276	34
ADCPPGMK	1xCarbamidomethyl [C3]; 1xTMT6plex [K8]; 1xTMT6plex [N-Term]	0.0238111	0.00182515	1	Q5W0V3	FAM160B1	Protein FAM160B1 OS=Homo sapiens OX=9606 GN=FAM160B1 PE=1 SV=1	0	1333.7	96.1	95.9	90.9	104.4	104.1	108.6	2	2.57	0.00171	13.6198	18
ADCTITMADSDFLALMTGK	1xCarbamidomethyl [C3]; 1xTMT6plex [K19]; 1xTMT6plex [N-Term]	2.29267e-10	0	3	P22307	SCP2	Non-specific lipid-transfer protein OS=Homo sapiens OX=9606 GN=SCP2 PE=1 SV=2	0	2519.26	83.8	92.9	87.8	115.1	108.1	112.3	2	5.32	0.0067	53.3134	101
ADDADEFGYSR	1xTMT6plex [N-Term]	7.17124e-06	0	1	Q7KZF4	SND1	Staphylococcal nuclease domain-containing protein 1 OS=Homo sapiens OX=9606 GN=SND1 PE=1 SV=1	0	1474.66	93	96.6	102	106.3	100.8	101.3	2	2.7	0.00199	18.4378	49
ADDDDVVVK	1xTMT6plex [K9]; 1xTMT6plex [N-Term]	0.000655675	7.57932e-05	1	Q9Y4G6	TLN2	Talin-2 OS=Homo sapiens OX=9606 GN=TLN2 PE=1 SV=4	0	1433.79	94.2	80	87.6	125.8	109.3	103.1	2	2.26	0.00162	17.711	20
ADDGPCK	1xCarbamidomethyl [C6]; 1xTMT6plex [K7]; 1xTMT6plex [N-Term]	0.0427156	0.00251919	1	P10646	TFPI	Tissue factor pathway inhibitor OS=Homo sapiens OX=9606 GN=TFPI PE=1 SV=1	0	1220.63							2	0.22	0.00013	9.7645	10
ADDGRPFPQVIK	1xTMT6plex [K12]; 1xTMT6plex [N-Term]	6.97785e-05	2.77511e-05	10	P04075	ALDOA	Fructose-bisphosphate aldolase A OS=Homo sapiens OX=9606 GN=ALDOA PE=1 SV=2	0	1801.04	95.7	102.4	96.4	102.7	104	98.8	2	1.38	0.00124	21.8825	27
ADDKLIAEEGVDSLNVK	2xTMT6plex [K4; K17]; 1xTMT6plex [N-Term]	7.03166e-08	0	2	O95202	LETM1	Mitochondrial proton/calcium exchanger protein OS=Homo sapiens OX=9606 GN=LETM1 PE=1 SV=1	1	2503.42	86.1	96.2	90.5	106.9	111.9	108.4	3	4.5	0.00375	32.5248	36
ADDLDFETGDAGASATFPMQCSALR	1xAcetyl [N-Term]; 1xCarbamidomethyl [C21]; 1xTMT6plex [N-Term]	3.60439e-06	0	10	P63241	EIF5A	Eukaryotic translation initiation factor 5A-1 OS=Homo sapiens OX=9606 GN=EIF5A PE=1 SV=2	0	2917.32							2	-78548.7	-114.576	47.8082	106
ADDLDFETGDAGASATFPMQCSALR	1xAcetyl [N-Term]; 1xCarbamidomethyl [C21]; 1xOxidation [M19]; 1xTMT6plex [N-Term]	6.11641e-05	1.80381e-05	4	P63241	EIF5A	Eukaryotic translation initiation factor 5A-1 OS=Homo sapiens OX=9606 GN=EIF5A PE=1 SV=2	0	2933.31							2	-78120.2	-114.576	41.9844	95
ADDIDIEAMLEAPYK	1xAcetyl [N-Term]; 1xTMT6plex [K15]; 1xTMT6plex [N-Term]	0.000542779	3.92285e-05	2	Q14498	RBM39	RNA-binding protein 39 OS=Homo sapiens OX=9606 GN=RBM39 PE=1 SV=2	0	2194.14	106.2	112.2	114.4	89.4	92.5	85.3	2	-104440	-114.577	53.5779	75
ADDIDIEAMLEAPYKK	1xAcetyl [N-Term]; 2xTMT6plex [K15; K16]; 1xTMT6plex [N-Term]	0.000481921	3.92285e-05	1	Q14498	RBM39	RNA-binding protein 39 OS=Homo sapiens OX=9606 GN=RBM39 PE=1 SV=2	1	2551.39	103	107	109.5	87.5	100.4	92.5	3	-89815.7	-76.3851	49.6847	28
ADDLGKGGNEESTK	2xTMT6plex [K6; K14]; 1xTMT6plex [N-Term]	4.03523e-05	0	1	P00441	SOD1	Superoxide dismutase [Cu-Zn] OS=Homo sapiens OX=9606 GN=SOD1 PE=1 SV=2	1	2108.14	80.2	89.9	102.3	107.3	107.7	112.7	3	1.62	0.00114	13.6359	4
ADDILDLK	1xTMT6plex [K8]; 1xTMT6plex [N-Term]	0.0144435	0.00122622	1	Q9H9E3	COG4	Conserved oligomeric Golgi complex subunit 4 OS=Homo sapiens OX=9606 GN=COG4 PE=1 SV=3	0	1360.81	99.6	99.6	97.4	98.2	100.3	104.9	2	0.78	0.00053	33.0871	17
ADDLLPLGDQTQDGDFGSR	1xTMT6plex [N-Term]	2.36351e-07	0	2	O43290	SART1	U4/U6.U5 tri-snRNP-associated protein 1 OS=Homo sapiens OX=9606 GN=SART1 PE=1 SV=1	0	2249.09	101.1	96.5	97.7	102.3	97	105.3	2	3.19	0.00359	36.2772	66
ADDNATIR	1xTMT6plex [N-Term]	0.00946637	0.000717013	1	O75821	EIF3G	Eukaryotic translation initiation factor 3 subunit G OS=Homo sapiens OX=9606 GN=EIF3G PE=1 SV=2	0	1104.58	100.4	100.7	105.4	95.5	97.6	100.4	2	2.52	0.00139	8.7456	22
ADDPSSYMEVVQAANTSGNWEELVK	1xTMT6plex [K25]; 1xTMT6plex [N-Term]	9.09114e-09	0	2	Q00610	CLTC	Clathrin heavy chain 1 OS=Homo sapiens OX=9606 GN=CLTC PE=1 SV=5	0	3198.57	109.1	94.5	96	103.6	94.8	101.9	3	4.34	0.00463	50.7401	90
ADDPSSYMEVVQAANTSGNWEELVK	1xOxidation [M8]; 1xTMT6plex [K25]; 1xTMT6plex [N-Term]	0.00227884	0.000201691	1	Q00610	CLTC	Clathrin heavy chain 1 OS=Homo sapiens OX=9606 GN=CLTC PE=1 SV=5	0	3214.56	92.4	97.1	104.1	96.9	102.7	106.8	4	0.83	0.00067	50.933	14
ADDPTMGEGPDK	1xTMT6plex [K12]; 1xTMT6plex [N-Term]	5.98785e-06	0	1	P61764	STXBP1	Syntaxin-binding protein 1 OS=Homo sapiens OX=9606 GN=STXBP1 PE=1 SV=1	0	1690.84	99.1	98.6	103.7	96.3	100.7	101.6	2	1.18	0.001	16.3329	43
ADDTFEALCIEPFSSPPELPDVMKPQDSGSSANEQAVQ	1xCarbamidomethyl [C9]; 1xTMT6plex [K24]; 1xTMT6plex [N-Term]	9.46352e-05	2.77511e-05	1	Q15370	ELOB	Elongin-B OS=Homo sapiens OX=9606 GN=ELOB PE=1 SV=1	0	4565.17	103.8	83.4	102.5	110.5	96.5	103.3	5	9.84	0.00899	52.0138	25
ADDTSAATIEK	1xTMT6plex [K11]; 1xTMT6plex [N-Term]	0.00030796	2.77511e-05	2	Q9Y2W2	WBP11	WW domain-binding protein 11 OS=Homo sapiens OX=9606 GN=WBP11 PE=1 SV=1	0	1579.86	104	104.4	106.1	91.8	98.7	95.1	2	-1.07	-0.00084	16.1385	43
ADDYEQVK	1xTMT6plex [K8]; 1xTMT6plex [N-Term]	0.00267098	0.000212306	1	P61421	ATP6V0D1	V-type proton ATPase subunit d 1 OS=Homo sapiens OX=9606 GN=ATP6V0D1 PE=1 SV=1	0	1425.76							2	-0.4	-0.00029	16.245	7
ADDYIEITGAGGK	1xTMT6plex [K13]; 1xTMT6plex [N-Term]	5.84126e-06	0	2	Q9Y3Z3	SAMHD1	Deoxynucleoside triphosphate triphosphohydrolase SAMHD1 OS=Homo sapiens OX=9606 GN=SAMHD1 PE=1 SV=2	0	1767.95	91.5	92.8	87.2	112.8	109.7	106	2	-1.02	-0.0009	28.279	47
ADEALAGLDEGALR	1xAcetyl [N-Term]; 1xTMT6plex [N-Term]	0.00013186	2.77511e-05	1	P53814	SMTN	Smoothelin OS=Homo sapiens OX=9606 GN=SMTN PE=1 SV=7	0	1671.88							2	-137067	-114.58	39.7598	29
ADEALNK	1xTMT6plex [K7]; 1xTMT6plex [N-Term]	0.0299991	0.00203998	1	P52701	MSH6	DNA mismatch repair protein Msh6 OS=Homo sapiens OX=9606 GN=MSH6 PE=1 SV=2	0	1218.71	113	106.5	104.3	85	92.2	99	2	2.48	0.00151	14.0793	21
ADEALNKDK	2xTMT6plex [K7; K9]; 1xTMT6plex [N-Term]	0.00243514	0.000201691	1	P52701	MSH6	DNA mismatch repair protein Msh6 OS=Homo sapiens OX=9606 GN=MSH6 PE=1 SV=2	1	1690.99	109.4	94.9	100.2	102.9	97.5	95.1	2	2.84	0.00241	14.0545	18
ADEASELACPTPK	1xCarbamidomethyl [C9]; 1xTMT6plex [K13]; 1xTMT6plex [N-Term]	2.91864e-07	0	2	P49327	FASN	Fatty acid synthase OS=Homo sapiens OX=9606 GN=FASN PE=1 SV=3	0	1846.96	98.4	111.5	104.5	93.2	101.6	90.9	2	2.64	0.00244	20.4843	70
ADEDPALFQSVK	1xTMT6plex [K12]; 1xTMT6plex [N-Term]	5.84126e-06	0	2	P48739	PITPNB	Phosphatidylinositol transfer protein beta isoform OS=Homo sapiens OX=9606 GN=PITPNB PE=1 SV=2	0	1777.97	103.9	99.6	102.1	108.4	93.9	92.1	2	2.22	0.00198	29.1509	37
ADEDPIMGFHQMFLLK	1xTMT6plex [K16]; 1xTMT6plex [N-Term]	4.67889e-07	0	4	P61970	NUTF2	Nuclear transport factor 2 OS=Homo sapiens OX=9606 GN=NUTF2 PE=1 SV=1	0	2350.23	93.8	98.8	99.9	103.7	101.2	102.6	2	6.32	0.00743	45.7814	65
ADEDPIMGFHQMFLLK	1xOxidation [M]; 1xTMT6plex [K16]; 1xTMT6plex [N-Term]	1.63211e-05	0	3	P61970	NUTF2	Nuclear transport factor 2 OS=Homo sapiens OX=9606 GN=NUTF2 PE=1 SV=1	0	2366.23	98	105.5	100.8	97	99.5	99.2	3	1.48	0.00117	38.9719	29
ADEEKLPPGWEK	1xAcetyl [N-Term]; 2xTMT6plex [K5; K12]; 1xTMT6plex [N-Term]	0.0441602	0.0025437	1	Q13526	PIN1	Peptidyl-prolyl cis-trans isomerase NIMA-interacting 1 OS=Homo sapiens OX=9606 GN=PIN1 PE=1 SV=1	1	2128.19	108.2	103.7	117.9	91.8	88.8	89.6	2	-107679	-114.58	28.5977	32
ADEGISFR	1xTMT6plex [N-Term]	0.00185419	0.000195329	1	Q06830	PRDX1	Peroxiredoxin-1 OS=Homo sapiens OX=9606 GN=PRDX1 PE=1 SV=1	0	1123.59	102.2	97.8	98.7	97.2	103.8	100.3	2	2.74	0.00154	17.9837	29
ADEHVIDQGDDGDNFYVIER	1xTMT6plex [N-Term]	2.17691e-07	0	1	P13861	PRKAR2A	cAMP-dependent protein kinase type II-alpha regulatory subunit OS=Homo sapiens OX=9606 GN=PRKAR2A PE=1 SV=2	0	2536.18	94	92.5	97.1	103.3	108.5	104.7	3	1.46	0.00124	28.4273	46
ADELNQTGQILVEQMGK	1xTMT6plex [K17]; 1xTMT6plex [N-Term]	1.46794e-06	0	1	P46939	UTRN	Utrophin OS=Homo sapiens OX=9606 GN=UTRN PE=1 SV=2	0	2332.26	95.8	96.7	96.5	102.7	98.2	110.1	3	3.61	0.00281	40.4222	49
ADEQTTCEVLDYFLR	1xCarbamidomethyl [C7]; 1xTMT6plex [N-Term]	3.31958e-07	0	1	Q8N201	INTS1	Integrator complex subunit 1 OS=Homo sapiens OX=9606 GN=INTS1 PE=1 SV=2	0	2089.01	101.5	95.8	103.4	101.4	96.2	101.7	2	8.58	0.00896	51.0074	33
ADEVAPAK	1xTMT6plex [K8]; 1xTMT6plex [N-Term]	0.00105926	0.000132543	1	P53396	ACLY	ATP-citrate synthase OS=Homo sapiens OX=9606 GN=ACLY PE=1 SV=3	0	1258.74	102.7	105	99.4	93.3	102.1	97.6	2	1.4	0.00088	12.345	33
ADEVAPAKK	2xTMT6plex [K8; K9]; 1xTMT6plex [N-Term]	0.000436195	3.92285e-05	2	P53396	ACLY	ATP-citrate synthase OS=Homo sapiens OX=9606 GN=ACLY PE=1 SV=3	1	1616	95.7	98.4	98.6	104.9	102.5	99.9	2	2.4	0.00194	12.1638	27
ADEVVWVR	1xTMT6plex [N-Term]	0.000842395	8.78677e-05	2	P14868	DARS	Aspartate--tRNA ligase, cytoplasmic OS=Homo sapiens OX=9606 GN=DARS PE=1 SV=2	0	1202.67	98.3	93.8	97.7	104.3	101.8	104.2	2	3.29	0.00198	24.7344	34
ADEWLMK	1xTMT6plex [K7]; 1xTMT6plex [N-Term]	0.00903128	0.000658429	2	P35580; P35579	MYH10; MYH9	Myosin-10 OS=Homo sapiens OX=9606 GN=MYH10 PE=1 SV=3;Myosin-9 OS=Homo sapiens OX=9606 GN=MYH9 PE=1 SV=4	0	1350.75	102	101	94.1	102.2	105	95.7	2	0.28	0.00019	31.327	33
ADFAQACQDAGVR	1xCarbamidomethyl [C7]; 1xTMT6plex [N-Term]	3.0466e-07	0	1	P11498	PC	Pyruvate carboxylase, mitochondrial OS=Homo sapiens OX=9606 GN=PC PE=1 SV=2	0	1637.79	90.1	103	95.1	105.3	101.6	104.9	2	5.07	0.00416	20.0827	56
ADFCIIHYAGK	1xCarbamidomethyl [C4]; 1xTMT6plex [K11]; 1xTMT6plex [N-Term]	5.03332e-06	0	6	P35580; P35579	MYH10; MYH9	Myosin-10 OS=Homo sapiens OX=9606 GN=MYH10 PE=1 SV=3;Myosin-9 OS=Homo sapiens OX=9606 GN=MYH9 PE=1 SV=4	0	1752.95	98.2	103.1	98.5	99.4	100.7	100.2	2	2.09	0.00183	29.0314	61
ADFGISAGQFVAVVWDK	1xAcetyl [N-Term]; 1xTMT6plex [K17]; 1xTMT6plex [N-Term]	0.000424571	3.92285e-05	7	Q6FI81	CIAPIN1	Anamorsin OS=Homo sapiens OX=9606 GN=CIAPIN1 PE=1 SV=2	0	2310.25	100.4	104.4	103.6	99	96.2	96.4	2	-99190.1	-114.577	55.4198	85
ADFLIFR	1xTMT6plex [N-Term]	0.0163888	0.0014228	1	Q8IZA0	KIAA0319L	Dyslexia-associated protein KIAA0319-like protein OS=Homo sapiens OX=9606 GN=KIAA0319L PE=1 SV=2	0	1110.65	97.7	87.6	94	110.4	102.5	107.7	2	2.88	0.0016	38.5356	21
ADFLSNDDYAVYVR	1xTMT6plex [N-Term]	7.86038e-06	0	1	O95714	HERC2	E3 ubiquitin-protein ligase HERC2 OS=Homo sapiens OX=9606 GN=HERC2 PE=1 SV=2	0	1876.93	97.1	90.5	93.4	106.4	103.8	108.8	2	1.65	0.00155	37.995	25
ADFNAVEYINTLFPTEQSLANIDEVVNK	1xTMT6plex [K28]; 1xTMT6plex [N-Term]	4.08293e-08	0	3	Q5VIR6	VPS53	Vacuolar protein sorting-associated protein 53 homolog OS=Homo sapiens OX=9606 GN=VPS53 PE=1 SV=1	0	3612.88	96	92.5	103.8	108.8	108.2	90.7	3	9.29	0.01119	54.7533	87
ADFPAGIPECGTDALR	1xCarbamidomethyl [C10]; 1xTMT6plex [N-Term]	1.66923e-06	0	4	P26640	VARS	Valine--tRNA ligase OS=Homo sapiens OX=9606 GN=VARS PE=1 SV=4	0	1918.95	104.5	101.6	96.5	99.7	97.5	100.2	2	2.81	0.0027	32.1028	40
ADFQAER	1xTMT6plex [N-Term]	0.166748	0.00570093	1	Q9Y6K9	IKBKG	NF-kappa-B essential modulator OS=Homo sapiens OX=9606 GN=IKBKG PE=1 SV=2	0	1065.55	100.2	100.7	101.6	91.8	98	107.6	2	2.88	0.00154	11.7667	11
ADFQGISPER	1xTMT6plex [N-Term]	0.00175578	0.000185426	2	P61803	DAD1	Dolichyl-diphosphooligosaccharide--protein glycosyltransferase subunit DAD1 OS=Homo sapiens OX=9606 GN=DAD1 PE=1 SV=3	0	1348.71	94.8	93.2	94.2	113.1	101.4	103.3	2	0.37	0.00025	19.6878	21
ADFSGMSQTDLSLSK	1xTMT6plex [K15]; 1xTMT6plex [N-Term]	1.26333e-08	0	1	P35237	SERPINB6	Serpin B6 OS=Homo sapiens OX=9606 GN=SERPINB6 PE=1 SV=3	0	2045.06	85.1	85.4	82.1	123.9	112.4	111.1	2	4.9	0.00502	33.8597	57
ADFSGMSTEK	1xTMT6plex [K10]; 1xTMT6plex [N-Term]	4.51054e-05	1.80381e-05	1	P50452	SERPINB8	Serpin B8 OS=Homo sapiens OX=9606 GN=SERPINB8 PE=1 SV=2	0	1530.79	95	93.5	91.1	107.1	109.5	103.8	2	2.54	0.00195	21.5923	50
ADFSPFGNSQGPSR	1xTMT6plex [N-Term]	7.48815e-05	2.77511e-05	2	Q9H2M9	RAB3GAP2	Rab3 GTPase-activating protein non-catalytic subunit OS=Homo sapiens OX=9606 GN=RAB3GAP2 PE=1 SV=1	0	1695.83	96.7	92.9	93	110.2	102.8	104.5	2	3.15	0.00267	25.6188	33
ADFVLAANSYDLAIK	1xTMT6plex [K15]; 1xTMT6plex [N-Term]	3.45274e-07	0	2	Q14318	FKBP8	Peptidyl-prolyl cis-trans isomerase FKBP8 OS=Homo sapiens OX=9606 GN=FKBP8 PE=1 SV=2	0	2069.17	97.7	98.5	99.2	102.9	101.3	100.3	2	4.81	0.00498	44.8195	75
ADGAAPGVASR	1xTMT6plex [N-Term]	0.00172996	0.000174676	1	Q8N3D4	EHBP1L1	EH domain-binding protein 1-like protein 1 OS=Homo sapiens OX=9606 GN=EHBP1L1 PE=1 SV=2	0	1200.65	100.7	98.3	94	101.8	103.4	101.8	2	0.98	0.00059	9.2143	35
ADGAEAKPAE	1xTMT6plex [K7]; 1xTMT6plex [N-Term]	0.0223239	0.00178685	2	P35579	MYH9	Myosin-9 OS=Homo sapiens OX=9606 GN=MYH9 PE=1 SV=4	0	1416.77	105.4	107.2	92.4	99.3	100.7	94.9	2	3.19	0.00226	10.8391	21
ADGAPSAAPPDGLLASPDLGLLK	1xTMT6plex [K23]; 1xTMT6plex [N-Term]	2.51857e-05	0	2	P17535	JUND	Transcription factor jun-D OS=Homo sapiens OX=9606 GN=JUND PE=1 SV=3	0	2604.46	97.8	99.9	98.7	104.3	100.2	99.1	3	7.87	0.00683	45.23	43
ADGEEDEVK	1xTMT6plex [K9]; 1xTMT6plex [N-Term]	0.000228031	2.77511e-05	1	Q15020	SART3	Squamous cell carcinoma antigen recognized by T-cells 3 OS=Homo sapiens OX=9606 GN=SART3 PE=1 SV=1	0	1449.75	104	107.7	108.7	92.6	94.1	93	2	0.87	0.00063	12.4003	26
ADGELNVDSLITR	1xAcetyl [N-Term]; 1xTMT6plex [N-Term]	0.000297586	2.77511e-05	1	P62140	PPP1CB	Serine/threonine-protein phosphatase PP1-beta catalytic subunit OS=Homo sapiens OX=9606 GN=PPP1CB PE=1 SV=3	0	1673.89							2	-136903	-114.58	40.7107	39
ADGENTAFLCEPR	1xCarbamidomethyl [C10]; 1xTMT6plex [N-Term]	3.1189e-05	0	1	Q9C0D5	TANC1	Protein TANC1 OS=Homo sapiens OX=9606 GN=TANC1 PE=1 SV=3	0	1708.82							2	1.36	0.00116	22.3205	20
ADGETILK	1xTMT6plex [K8]; 1xTMT6plex [N-Term]	0.00119766	0.000132543	2	P52788	SMS	Spermine synthase OS=Homo sapiens OX=9606 GN=SMS PE=1 SV=2	0	1304.78	98.7	100.3	93.8	99	107.6	100.5	2	2.75	0.0018	19.6126	31
ADGGFRPSR	1xTMT6plex [N-Term]	0.00817142	0.000611155	1	Q4G0N4	NADK2	NAD kinase 2, mitochondrial OS=Homo sapiens OX=9606 GN=NADK2 PE=1 SV=2	0	1191.64							3	3.26	0.00129	8.5438	4
ADGGTQVIDTK	1xTMT6plex [K11]; 1xTMT6plex [N-Term]	1.17307e-05	0	2	P09622	DLD	Dihydrolipoyl dehydrogenase, mitochondrial OS=Homo sapiens OX=9606 GN=DLD PE=1 SV=2	0	1562.88	95.1	96.9	91.2	106	103.3	107.5	2	3.48	0.00272	17.2449	38
ADGLHSEFMNYK	1xTMT6plex [K12]; 1xTMT6plex [N-Term]	0.000456359	3.92285e-05	1	Q9Y2L9	LRCH1	Leucine-rich repeat and calponin homology domain-containing protein 1 OS=Homo sapiens OX=9606 GN=LRCH1 PE=1 SV=3	0	1869.96							3	0.46	0.00029	24.7987	12
ADGLLGMFLK	1xTMT6plex [K10]; 1xTMT6plex [N-Term]	3.00724e-05	0	1	Q8N766	EMC1	ER membrane protein complex subunit 1 OS=Homo sapiens OX=9606 GN=EMC1 PE=1 SV=1	0	1522.91	107.7	111	103.4	95.7	93.7	88.4	2	4.12	0.00313	51.0164	47
ADGIVSK	1xTMT6plex [K7]; 1xTMT6plex [N-Term]	0.00658065	0.000505076	2	P63220	RPS21	40S ribosomal protein S21 OS=Homo sapiens OX=9606 GN=RPS21 PE=1 SV=1	0	1147.71	103.8	97.9	100	102	98.8	97.6	2	2.85	0.00163	15.3897	37
ADGQVAELLLR	1xAcetyl [N-Term]; 1xTMT6plex [N-Term]	0.000201563	2.77511e-05	1	Q9Y285	FARSA	Phenylalanine--tRNA ligase alpha subunit OS=Homo sapiens OX=9606 GN=FARSA PE=1 SV=3	0	1455.84							2	-157406	-114.579	44.7803	75
ADGSGYGSTLPPEK	1xTMT6plex [K14]; 1xTMT6plex [N-Term]	0.000305327	2.77511e-05	1	P55196	AFDN	Afadin OS=Homo sapiens OX=9606 GN=AFDN PE=1 SV=3	0	1836.97	91.9	89.9	101	115.6	104.3	97.3	2	-6.69	-0.00614	19.0872	9
ADGVPVYLK	1xTMT6plex [K9]; 1xTMT6plex [N-Term]	0.000280405	2.77511e-05	1	O14548	COX7A2L	Cytochrome c oxidase subunit 7A-related protein, mitochondrial OS=Homo sapiens OX=9606 GN=COX7A2L PE=1 SV=2	0	1419.86	91.3	88.9	95.2	111.2	107.3	106.2	2	4.1	0.00291	26.7658	26
ADGVVEGIDVNGPK	1xTMT6plex [K14]; 1xTMT6plex [N-Term]	3.93282e-05	0	1	O94888	UBXN7	UBX domain-containing protein 7 OS=Homo sapiens OX=9606 GN=UBXN7 PE=1 SV=2	0	1828.02	100	102.7	103.9	101.5	100.4	91.5	2	4.94	0.00452	26.5252	57
ADGYEPPVQESV	1xTMT6plex [N-Term]	0.00452305	0.000335057	3	P61247	RPS3A	40S ribosomal protein S3a OS=Homo sapiens OX=9606 GN=RPS3A PE=1 SV=2	0	1519.75	95.6	95.8	101.2	99.3	104.4	103.8	2	2.46	0.00187	25.7821	27
ADGYNQPDSK	1xTMT6plex [K10]; 1xTMT6plex [N-Term]	3.36449e-05	0	1	O43390; O60506	HNRNPR; SYNCRIP	Heterogeneous nuclear ribonucleoprotein R OS=Homo sapiens OX=9606 GN=HNRNPR PE=1 SV=1;Heterogeneous nuclear ribonucleoprotein Q OS=Homo sapiens OX=9606 GN=SYNCRIP PE=1 SV=2	0	1552.8	110.8	104.9	106.5	88.9	97.8	91.2	2	1.46	0.00113	12.2166	40
ADGYVLEGK	1xTMT6plex [K9]; 1xTMT6plex [N-Term]	0.000136065	2.77511e-05	3	P62241	RPS8	40S ribosomal protein S8 OS=Homo sapiens OX=9606 GN=RPS8 PE=1 SV=2	0	1409.8	104.1	101.1	97.1	98.5	100.9	98.2	2	2.39	0.00168	22.8256	42
ADHDFVVQEDFMK	1xTMT6plex [K13]; 1xTMT6plex [N-Term]	2.29686e-07	0	2	P62333	PSMC6	26S proteasome regulatory subunit 10B OS=Homo sapiens OX=9606 GN=PSMC6 PE=1 SV=1	0	2039.03	93	87.5	96.2	116.6	103.3	103.5	2	3.1	0.00316	29.715	71
ADHDFVVQEDFMK	1xOxidation [M12]; 1xTMT6plex [K13]; 1xTMT6plex [N-Term]	7.79415e-05	2.77511e-05	1	P62333	PSMC6	26S proteasome regulatory subunit 10B OS=Homo sapiens OX=9606 GN=PSMC6 PE=1 SV=1	0	2055.03							3	3.5	0.00239	25.0251	17
ADHGEPIGR	1xTMT6plex [N-Term]	0.000987293	0.000123391	2	P08238	HSP90AB1	Heat shock protein HSP 90-beta OS=Homo sapiens OX=9606 GN=HSP90AB1 PE=1 SV=4	0	1180.63	103.5	102.8	100.6	83.7	93.9	115.5	2	0.45	0.00027	7.6695	27
ADHQPLTEASYVNLPTIALCNTDSPLR	1xCarbamidomethyl [C20]; 1xTMT6plex [N-Term]	2.46267e-10	0	6	P08865	RPSA	40S ribosomal protein SA OS=Homo sapiens OX=9606 GN=RPSA PE=1 SV=4	0	3225.64	89	83.9	92.5	123.9	110.6	100.1	3	3.2	0.00344	40.31	91
ADHSFSDGVPSDSVEAAK	1xAcetyl [N-Term]; 1xTMT6plex [K18]; 1xTMT6plex [N-Term]	4.2334e-05	0	1	Q99733	NAP1L4	Nucleosome assembly protein 1-like 4 OS=Homo sapiens OX=9606 GN=NAP1L4 PE=1 SV=1	0	2319.15							2	-98808.4	-114.576	23.435	49
ADHWMLYECESPWAGGSR	1xCarbamidomethyl [C9]; 1xTMT6plex [N-Term]	3.25566e-05	0	1	O14734	ACOT8	Acyl-coenzyme A thioesterase 8 OS=Homo sapiens OX=9606 GN=ACOT8 PE=1 SV=1	0	2381.06	103	96.4	95.8	96.9	97.3	110.6	3	5.57	0.00442	34.1504	27
ADKDYHFK	2xTMT6plex [K3; K8]; 1xTMT6plex [N-Term]	0.00634066	0.000465668	6	P06748	NPM1	Nucleophosmin OS=Homo sapiens OX=9606 GN=NPM1 PE=1 SV=2	1	1710.98	105.6	106.5	105.1	94.8	98.9	89.1	2	1.34	0.00115	14.3877	29
ADKDYHFKVDNDENEHQLSLR	2xTMT6plex [K3; K8]; 1xTMT6plex [N-Term]	0.00078926	7.57932e-05	2	P06748	NPM1	Nucleophosmin OS=Homo sapiens OX=9606 GN=NPM1 PE=1 SV=2	2	3260.69	83.6	93.5	98.1	94	97.3	133.6	6	2.8	0.00152	19.0271	18
ADKMDMSLDDIIK	1xAcetyl [N-Term]; 2xTMT6plex [K3; K13]; 1xTMT6plex [N-Term]	0.127909	0.00481966	3	Q86V81	ALYREF	THO complex subunit 4 OS=Homo sapiens OX=9606 GN=ALYREF PE=1 SV=3	1	2224.22	94.1	97.6	97.6	99.2	105.5	106	2	-103027	-114.578	43.0207	45
ADKNEVAAEVAK	2xTMT6plex [K3; K12]; 1xTMT6plex [N-Term]	3.65604e-06	0	2	P56192	MARS	Methionine--tRNA ligase, cytoplasmic OS=Homo sapiens OX=9606 GN=MARS PE=1 SV=2	1	1932.14	105.7	95.9	95	98.4	109.2	95.8	2	1.38	0.00134	18.0978	47
ADKPDMGEIASFDK	1xAcetyl [N-Term]; 2xTMT6plex [K3; K14]; 1xTMT6plex [N-Term]	0.000243383	2.77511e-05	4	P63313	TMSB10	Thymosin beta-10 OS=Homo sapiens OX=9606 GN=TMSB10 PE=1 SV=2	0	2253.2	64.4	99	95.4	117.7	115.2	108.3	2	-101704	-114.58	34.3998	58
ADKPDMGEIASFDK	1xAcetyl [N-Term]; 1xOxidation [M6]; 2xTMT6plex [K3; K14]; 1xTMT6plex [N-Term]	0.00236159	0.000201691	2	P63313	TMSB10	Thymosin beta-10 OS=Homo sapiens OX=9606 GN=TMSB10 PE=1 SV=2	0	2269.2	70.4	94	93.3	123.5	113	105.8	2	-100989	-114.582	26.8978	29
ADKTPGGSQK	1xAcetyl [N-Term]; 2xTMT6plex [K3; K10]; 1xTMT6plex [N-Term]	0.0712391	0.00335999	1	O15042	U2SURP	U2 snRNP-associated SURP motif-containing protein OS=Homo sapiens OX=9606 GN=U2SURP PE=1 SV=2	1	1718.01	96.9	105	103.6	88.9	100.9	104.6	2	-133390	-114.582	10.1712	11
ADKVEQR	1xTMT6plex [K3]; 1xTMT6plex [N-Term]	0.163608	0.00565065	1	Q99832	CCT7	T-complex protein 1 subunit eta OS=Homo sapiens OX=9606 GN=CCT7 PE=1 SV=2	1	1303.77	103.3	94.4	99	86.4	97.4	119.5	2	2.48	0.00162	8.4512	9
ADLAAVEAK	1xTMT6plex [K9]; 1xTMT6plex [N-Term]	0.000151946	2.77511e-05	2	Q14204	DYNC1H1	Cytoplasmic dynein 1 heavy chain 1 OS=Homo sapiens OX=9606 GN=DYNC1H1 PE=1 SV=5	0	1345.81	91.6	95.9	88.6	104.6	110.6	108.8	3	2.18	0.00098	22.3026	44
ADLAECNIK	1xAcetyl [N-Term]; 1xCarbamidomethyl [C6]; 1xTMT6plex [K9]; 1xTMT6plex [N-Term]	0.0263897	0.00190178	1	P33176	KIF5B	Kinesin-1 heavy chain OS=Homo sapiens OX=9606 GN=KIF5B PE=1 SV=1	0	1533.83							2	-149402	-114.579	26.2502	22
ADLAEEYSK	1xTMT6plex [K9]; 1xTMT6plex [N-Term]	8.93917e-05	2.77511e-05	3	P68036	UBE2L3	Ubiquitin-conjugating enzyme E2 L3 OS=Homo sapiens OX=9606 GN=UBE2L3 PE=1 SV=1	0	1483.8	102	102.3	98.7	102.2	100.6	94.2	2	1.18	0.00088	21.9051	51
ADLAEEYSKDR	1xTMT6plex [K9]; 1xTMT6plex [N-Term]	8.24099e-05	2.77511e-05	3	P68036	UBE2L3	Ubiquitin-conjugating enzyme E2 L3 OS=Homo sapiens OX=9606 GN=UBE2L3 PE=1 SV=1	1	1754.93	97.5	102.5	98.9	100.2	101.3	99.5	2	1.97	0.00173	18.3949	24
ADIAMVICDTPQK	1xCarbamidomethyl [C8]; 1xTMT6plex [K13]; 1xTMT6plex [N-Term]	1.58759e-05	0	2	Q9ULC5	ACSL5	Long-chain-fatty-acid--CoA ligase 5 OS=Homo sapiens OX=9606 GN=ACSL5 PE=1 SV=1	0	1920.03	90.9	108.6	92	103.1	105.5	100	2	3.95	0.00379	34.3444	51
ADLANEEKPAIAPPVFVFQK	1xAcetyl [N-Term]; 2xTMT6plex [K8; K20]; 1xTMT6plex [N-Term]	0.000124789	2.77511e-05	2	Q9H6Z4	RANBP3	Ran-binding protein 3 OS=Homo sapiens OX=9606 GN=RANBP3 PE=1 SV=1	0	2913.67	106.6	113.3	105.9	88.6	92.4	93.3	3	-78647	-76.3838	46.6077	50
ADLATDQK	1xTMT6plex [K8]; 1xTMT6plex [N-Term]	0.00131125	0.000142151	1	Q13895	BYSL	Bystin OS=Homo sapiens OX=9606 GN=BYSL PE=1 SV=3	0	1319.76							2	1.87	0.00123	14.4092	24
ADIDATLYEQVILEK	1xTMT6plex [K15]; 1xTMT6plex [N-Term]	8.13925e-05	2.77511e-05	1	Q9NW15	ANO10	Anoctamin-10 OS=Homo sapiens OX=9606 GN=ANO10 PE=1 SV=2	0	2179.23	94.7	99.4	102.3	102.9	91.7	109	3	2.02	0.00147	47.393	37
ADLDKLNIDSIIQR	1xAcetyl [N-Term]; 1xTMT6plex [K5]; 1xTMT6plex [N-Term]	0.00108959	0.000132543	2	P36873	PPP1CC	Serine/threonine-protein phosphatase PP1-gamma catalytic subunit OS=Homo sapiens OX=9606 GN=PPP1CC PE=1 SV=1	1	2114.22	98.8	100	105.2	96.3	98.6	101	3	-108387	-76.3848	43.4487	35
ADIDISGPNVDVDVPDVNIEGPDAK	1xTMT6plex [K25]; 1xTMT6plex [N-Term]	2.38622e-09	0	4	Q09666	AHNAK	Neuroblast differentiation-associated protein AHNAK OS=Homo sapiens OX=9606 GN=AHNAK PE=1 SV=2	0	3022.56	102.4	101.9	89.4	104.1	100.6	101.6	2	1.76	0.00267	42.3076	102
ADIDLTK	1xTMT6plex [K7]; 1xTMT6plex [N-Term]	0.0285765	0.0020067	1	P62269	RPS18	40S ribosomal protein S18 OS=Homo sapiens OX=9606 GN=RPS18 PE=1 SV=3	0	1233.75							2	0.14	9e-05	21.8048	9
ADIDVSGPK	1xTMT6plex [K9]; 1xTMT6plex [N-Term]	0.000139949	2.77511e-05	12	Q09666	AHNAK	Neuroblast differentiation-associated protein AHNAK OS=Homo sapiens OX=9606 GN=AHNAK PE=1 SV=2	0	1359.79	102.7	100.7	93.9	97	105.3	100.3	2	2.32	0.00157	18.8991	55
ADIDVSGPSVDTDAPDLDIEGPEGK	1xTMT6plex [K25]; 1xTMT6plex [N-Term]	9.22781e-08	0	1	Q09666	AHNAK	Neuroblast differentiation-associated protein AHNAK OS=Homo sapiens OX=9606 GN=AHNAK PE=1 SV=2	0	2970.48	96.8	92.9	82.5	117.8	102.7	107.2	3	2.65	0.00263	37.8872	79
ADLEAQR	1xTMT6plex [N-Term]	0.0239314	0.00182515	1	P61106	RAB14	Ras-related protein Rab-14 OS=Homo sapiens OX=9606 GN=RAB14 PE=1 SV=4	0	1031.57	105.8	102.1	104.8	96.4	95.8	95.1	2	1.42	0.00073	10.1539	17
ADIEEIK	1xTMT6plex [K7]; 1xTMT6plex [N-Term]	0.00737607	0.00053284	1	P80303	NUCB2	Nucleobindin-2 OS=Homo sapiens OX=9606 GN=NUCB2 PE=1 SV=3	0	1275.76	82.1	81.9	82.5	129.7	115.3	108.6	2	3.05	0.00195	21.3509	31
ADLELPWRPLYDMVER	1xTMT6plex [N-Term]	1.93852e-05	0	1	Q14997	PSME4	Proteasome activator complex subunit 4 OS=Homo sapiens OX=9606 GN=PSME4 PE=1 SV=2	0	2232.17	102	98.7	101.6	97.7	104.1	95.9	3	3.77	0.0028	47.9726	17
ADIEISGPK	1xTMT6plex [K9]; 1xTMT6plex [N-Term]	8.16455e-05	2.77511e-05	3	Q09666	AHNAK	Neuroblast differentiation-associated protein AHNAK OS=Homo sapiens OX=9606 GN=AHNAK PE=1 SV=2	0	1387.82	99	107.3	104.1	96.6	97.5	95.5	2	2.41	0.00167	21.3868	57
ADIEMPFDPSK	1xTMT6plex [K11]; 1xTMT6plex [N-Term]	5.2907e-05	1.80381e-05	2	O75369	FLNB	Filamin-B OS=Homo sapiens OX=9606 GN=FLNB PE=1 SV=2	0	1707.9	99.6	101.9	100.7	96.3	102.5	99.1	2	-3.16	-0.0027	34.4613	23
ADIEMPFDPSK	1xOxidation [M5]; 1xTMT6plex [K11]; 1xTMT6plex [N-Term]	0.101535	0.00432911	1	O75369	FLNB	Filamin-B OS=Homo sapiens OX=9606 GN=FLNB PE=1 SV=2	0	1723.9	111	97.7	102.3	93.4	99.1	96.4	2	1.59	0.00137	26.9069	24
ADIESLVTEK	1xTMT6plex [K10]; 1xTMT6plex [N-Term]	2.51857e-05	0	2	Q13439	GOLGA4	Golgin subfamily A member 4 OS=Homo sapiens OX=9606 GN=GOLGA4 PE=1 SV=1	0	1562.9	98.6	90.1	97.5	109.3	105.8	98.6	2	2.46	0.00192	33.1686	48
ADIEVACYGYEGIDAVK	1xCarbamidomethyl [C7]; 1xTMT6plex [K17]; 1xTMT6plex [N-Term]	1.95312e-09	0	6	P05198	EIF2S1	Eukaryotic translation initiation factor 2 subunit 1 OS=Homo sapiens OX=9606 GN=EIF2S1 PE=1 SV=3	0	2331.19	101	98.6	100.3	99.6	98.7	101.8	2	5.39	0.00628	38.3293	71
ADIFMFDEPSSYLDVK	1xTMT6plex [K16]; 1xTMT6plex [N-Term]	5.47588e-07	0	2	P61221	ABCE1	ATP-binding cassette sub-family E member 1 OS=Homo sapiens OX=9606 GN=ABCE1 PE=1 SV=1	0	2335.19	112.3	108.1	105.4	93.9	93.9	86.4	2	4.06	0.00474	51.0574	65
ADIFMFDEPSSYLDVK	1xOxidation [M5]; 1xTMT6plex [K16]; 1xTMT6plex [N-Term]	3.37555e-05	0	1	P61221	ABCE1	ATP-binding cassette sub-family E member 1 OS=Homo sapiens OX=9606 GN=ABCE1 PE=1 SV=1	0	2351.19	103.2	93	114.7	96.9	96.6	95.7	3	1.31	0.00102	48.3015	36
ADIFVDPVLHTACALDIK	1xCarbamidomethyl [C13]; 1xTMT6plex [K18]; 1xTMT6plex [N-Term]	7.58068e-07	0	3	Q92896	GLG1	Golgi apparatus protein 1 OS=Homo sapiens OX=9606 GN=GLG1 PE=1 SV=2	0	2456.36	85.6	99	103	109.6	100	102.8	3	6.51	0.00533	47.6996	67
ADIGCTPGSGK	1xCarbamidomethyl [C5]; 1xTMT6plex [K11]; 1xTMT6plex [N-Term]	8.42254e-05	2.77511e-05	1	P01024	C3	Complement C3 OS=Homo sapiens OX=9606 GN=C3 PE=1 SV=2	0	1520.81	80.8	95.2	82.4	124.4	110	107.2	2	-0.11	-8e-05	14.704	33
ADLGLWR	1xTMT6plex [N-Term]	0.0157732	0.00137059	1	Q14669	TRIP12	E3 ubiquitin-protein ligase TRIP12 OS=Homo sapiens OX=9606 GN=TRIP12 PE=1 SV=1	0	1059.61	117.4	98.9	110	87.5	92.4	93.8	2	2.83	0.0015	29.0292	24
ADIGVAMGIAGSDVSK	1xTMT6plex [K16]; 1xTMT6plex [N-Term]	1.4055e-09	0	2	P05023; P13637	ATP1A1; ATP1A3	Sodium/potassium-transporting ATPase subunit alpha-1 OS=Homo sapiens OX=9606 GN=ATP1A1 PE=1 SV=1;Sodium/potassium-transporting ATPase subunit alpha-3 OS=Homo sapiens OX=9606 GN=ATP1A3 PE=1 SV=3	0	1949.08	101.9	102	98.9	101	95.9	100.5	2	3.08	0.003	34.8869	83
ADLGVSGPK	1xTMT6plex [K9]; 1xTMT6plex [N-Term]	0.000135115	2.77511e-05	1	Q09666	AHNAK	Neuroblast differentiation-associated protein AHNAK OS=Homo sapiens OX=9606 GN=AHNAK PE=1 SV=2	0	1301.78	105.1	104.1	99.5	98.8	101.5	91	2	2.22	0.00145	17.8545	47
ADIKGPEDK	2xTMT6plex [K4; K9]; 1xTMT6plex [N-Term]	0.0427156	0.00251919	1	P36542	ATP5F1C	ATP synthase subunit gamma, mitochondrial OS=Homo sapiens OX=9606 GN=ATP5F1C PE=1 SV=1	1	1659.99	97.7	101.4	93.1	107.5	98.9	101.3	2	1.99	0.00165	14.0359	29
ADLIAYLK	1xTMT6plex [K8]; 1xTMT6plex [N-Term]	0.000570936	3.92285e-05	2	P99999	CYCS	Cytochrome c OS=Homo sapiens OX=9606 GN=CYCS PE=1 SV=2	0	1364.86	100.7	83	80.1	112	116.4	107.8	2	3.07	0.00209	40.592	43
ADILEDKDGK	2xTMT6plex [K7; K10]; 1xTMT6plex [N-Term]	8.52835e-05	2.77511e-05	4	P52272	HNRNPM	Heterogeneous nuclear ribonucleoprotein M OS=Homo sapiens OX=9606 GN=HNRNPM PE=1 SV=3	1	1791.05	105.1	110.1	105.5	90.4	98.8	90.2	2	2.52	0.00225	21.6855	48
ADLIFTVDFEIATK	1xTMT6plex [K14]; 1xTMT6plex [N-Term]	0.0596341	0.00302903	1	Q14204	DYNC1H1	Cytoplasmic dynein 1 heavy chain 1 OS=Homo sapiens OX=9606 GN=DYNC1H1 PE=1 SV=5	0	2041.16							3	9.41	0.0064	56.3866	15
ADLLGIVSELQLK	1xTMT6plex [K13]; 1xTMT6plex [N-Term]	4.62898e-07	0	2	Q96CV9	OPTN	Optineurin OS=Homo sapiens OX=9606 GN=OPTN PE=1 SV=3	0	1857.15	88	91.9	91.3	122.2	98.5	108	2	3.44	0.0032	52.6743	45
ADLLGSILSSMEKPPSLGDQETR	1xAcetyl [N-Term]; 1xTMT6plex [K13]; 1xTMT6plex [N-Term]	6.51858e-06	0	1	O75391	SPAG7	Sperm-associated antigen 7 OS=Homo sapiens OX=9606 GN=SPAG7 PE=1 SV=2	0	2944.57	104	99.5	95.5	100.7	104.6	95.6	3	-77825.7	-76.3878	54.6591	33
ADLLGSILSSMEKPPSLGDQETR	1xAcetyl [N-Term]; 1xOxidation [M11]; 1xTMT6plex [K13]; 1xTMT6plex [N-Term]	7.02074e-05	2.77511e-05	1	O75391	SPAG7	Sperm-associated antigen 7 OS=Homo sapiens OX=9606 GN=SPAG7 PE=1 SV=2	0	2960.57	110.9	105.5	99.8	101.6	88.6	93.5	3	-77400.1	-76.3827	54.6263	40
ADIIHACDIVEDAAIAYGYNNIQMTLPK	1xCarbamidomethyl [C7]; 1xTMT6plex [K28]; 1xTMT6plex [N-Term]	1.53246e-08	0	3	Q9NSD9	FARSB	Phenylalanine--tRNA ligase beta subunit OS=Homo sapiens OX=9606 GN=FARSB PE=1 SV=3	0	3577.84	94.5	105.9	103.8	101.8	102.6	91.4	3	7.88	0.00939	52.4802	68
ADLLLLENK	1xTMT6plex [K9]; 1xTMT6plex [N-Term]	0.00914838	0.00067718	2	P0C221	CCDC175	Coiled-coil domain-containing protein 175 OS=Homo sapiens OX=9606 GN=CCDC175 PE=4 SV=2	0	1486.92	96.8	93.2	98.6	113.5	98.5	99.4	2	2.21	0.00164	36.4199	24
ADLLLSTQPGR	1xTMT6plex [N-Term]	0.000121025	2.77511e-05	1	P08195	SLC3A2	4F2 cell-surface antigen heavy chain OS=Homo sapiens OX=9606 GN=SLC3A2 PE=1 SV=3	0	1399.81	107.9	96.2	106.3	95.5	97	97.1	2	3.1	0.00217	26.845	47
ADLLLSTQPGREEGSPLELER	1xTMT6plex [N-Term]	3.35683e-06	0	3	P08195	SLC3A2	4F2 cell-surface antigen heavy chain OS=Homo sapiens OX=9606 GN=SLC3A2 PE=1 SV=3	1	2539.36	103.5	85.9	98.1	106.7	104.8	101	2	0.76	0.00097	34.2213	55
ADLINNLGTIAK	1xTMT6plex [K12]; 1xTMT6plex [N-Term]	4.09917e-07	0	11	P07900; P08238	HSP90AA1; HSP90AB1	Heat shock protein HSP 90-alpha OS=Homo sapiens OX=9606 GN=HSP90AA1 PE=1 SV=5;Heat shock protein HSP 90-beta OS=Homo sapiens OX=9606 GN=HSP90AB1 PE=1 SV=4	0	1701.03	96.2	106	106.4	95.4	95.5	100.4	2	-0.31	-0.00026	36.3987	83
ADILQVGLR	1xTMT6plex [N-Term]	0.000192361	2.77511e-05	1	Q9H074	PAIP1	Polyadenylate-binding protein-interacting protein 1 OS=Homo sapiens OX=9606 GN=PAIP1 PE=1 SV=1	0	1213.75	93.8	94.2	94.4	105.1	110.4	102	2	2.25	0.00136	29.9564	39
ADLISEDVQR	1xTMT6plex [N-Term]	0.000379739	3.92285e-05	1	Q92888	ARHGEF1	Rho guanine nucleotide exchange factor 1 OS=Homo sapiens OX=9606 GN=ARHGEF1 PE=1 SV=2	0	1374.74	99.5	91	98.4	103.6	106.3	101.2	2	-0.99	-0.00068	21.6458	34
ADLLTAEQR	1xTMT6plex [N-Term]	0.00117515	0.000132543	1	Q9H089	LSG1	Large subunit GTPase 1 homolog OS=Homo sapiens OX=9606 GN=LSG1 PE=1 SV=2	0	1245.7							2	4.78	0.00297	20.0798	27
ADIIVSELLGSFADNELSPECLDGAQHFLK	1xCarbamidomethyl [C21]; 1xTMT6plex [K30]; 1xTMT6plex [N-Term]	8.64715e-09	0	2	O14744	PRMT5	Protein arginine N-methyltransferase 5 OS=Homo sapiens OX=9606 GN=PRMT5 PE=1 SV=4	0	3746.94	95.3	114.9	93.4	102.8	95.2	98.5	3	7.14	0.00891	54.7328	87
ADIIYPGHGPVIHNAEAK	1xTMT6plex [K18]; 1xTMT6plex [N-Term]	1.60539e-08	0	2	Q53H82	LACTB2	Endoribonuclease LACTB2 OS=Homo sapiens OX=9606 GN=LACTB2 PE=1 SV=2	0	2360.31	99.6	97.2	96.6	105.4	102.5	98.7	4	1.02	0.0006	20.0842	75
ADLNIILSSPEQLELFLLAQQK	1xTMT6plex [K22]; 1xTMT6plex [N-Term]	1.1288e-05	0	2	Q9BQG0	MYBBP1A	Myb-binding protein 1A OS=Homo sapiens OX=9606 GN=MYBBP1A PE=1 SV=2	0	2941.7	119.2	108	124.7	79.4	88.7	80	3	6.58	0.00646	54.6211	60
ADLNQGIGEPQSPSR	1xTMT6plex [N-Term]	1.89127e-06	0	2	Q96C19	EFHD2	EF-hand domain-containing protein D2 OS=Homo sapiens OX=9606 GN=EFHD2 PE=1 SV=1	0	1797.93	106.6	94.7	90.7	97.8	103.4	106.8	2	2.58	0.00231	17.3019	52
ADLPEGVAVSGPSPAEFCR	1xCarbamidomethyl [C18]; 1xTMT6plex [N-Term]	1.99235e-05	0	1	Q8IXI1	RHOT2	Mitochondrial Rho GTPase 2 OS=Homo sapiens OX=9606 GN=RHOT2 PE=1 SV=2	0	2188.09	107.6	105.3	105.2	94.4	91.7	95.9	3	-1.44	-0.00105	32.0873	32
ADLQAAAVR	1xTMT6plex [N-Term]	0.0011051	0.000132543	1	Q9BTY7	HGH1	Protein HGH1 homolog OS=Homo sapiens OX=9606 GN=HGH1 PE=1 SV=1	0	1143.67							2	2.81	0.00161	14.2631	23
ADLQNHLDTAQNALQDK	1xTMT6plex [K17]; 1xTMT6plex [N-Term]	4.62573e-05	1.80381e-05	1	Q15075	EEA1	Early endosome antigen 1 OS=Homo sapiens OX=9606 GN=EEA1 PE=1 SV=2	0	2353.25	96.8	100.9	97.1	100.5	100.1	104.6	3	2.85	0.00223	25.4399	26
ADLSAMSAER	1xTMT6plex [N-Term]	3.90757e-05	0	1	P50453	SERPINB9	Serpin B9 OS=Homo sapiens OX=9606 GN=SERPINB9 PE=1 SV=1	0	1279.65	87.8	89.3	86.1	120	109.2	107.6	2	2.71	0.00173	17.7004	38
ADLSGMSGAR	1xTMT6plex [N-Term]	0.000272257	2.77511e-05	1	P30740	SERPINB1	Leukocyte elastase inhibitor OS=Homo sapiens OX=9606 GN=SERPINB1 PE=1 SV=1	0	1193.61	97.9	92.2	89.1	106.1	105	109.6	2	0.68	0.00041	14.834	31
ADISGNITK	1xTMT6plex [K9]; 1xTMT6plex [N-Term]	0.000164695	2.77511e-05	1	Q9NZD2	GLTP	Glycolipid transfer protein OS=Homo sapiens OX=9606 GN=GLTP PE=1 SV=3	0	1376.81	102.1	99.7	92.7	104.3	98.3	102.9	2	0.47	0.00032	18.4553	30
ADLSLADALTEPSPDIEGEIK	1xAcetyl [N-Term]; 1xTMT6plex [K21]; 1xTMT6plex [N-Term]	4.31496e-05	1.80381e-05	2	P27816	MAP4	Microtubule-associated protein 4 OS=Homo sapiens OX=9606 GN=MAP4 PE=1 SV=3	0	2684.43	98.1	95.3	92.5	108.5	97	108.7	2	-85367	-114.581	52.3105	83
ADLSLADALTEPSPDIEGEIKR	1xAcetyl [N-Term]; 1xTMT6plex [K21]; 1xTMT6plex [N-Term]	7.24762e-06	0	2	P27816	MAP4	Microtubule-associated protein 4 OS=Homo sapiens OX=9606 GN=MAP4 PE=1 SV=3	1	2840.53	90.1	93.6	84.5	109.3	112.8	109.7	2	-80671.4	-114.575	46.2723	70
ADLTAEMISAPLGDFR	1xTMT6plex [N-Term]	1.30944e-06	0	2	Q9H3Q1	CDC42EP4	Cdc42 effector protein 4 OS=Homo sapiens OX=9606 GN=CDC42EP4 PE=1 SV=1	0	1936	101.9	100.8	105.4	94.2	96.6	101	2	6.72	0.00651	46.076	55
ADLTALFLPR	1xTMT6plex [N-Term]	3.30967e-05	0	1	Q13045	FLII	Protein flightless-1 homolog OS=Homo sapiens OX=9606 GN=FLII PE=1 SV=2	0	1345.8	96.6	103.9	109.7	95.6	95.9	98.5	2	3.55	0.00239	45.0307	53
ADLTEYLSTHYK	1xTMT6plex [K12]; 1xTMT6plex [N-Term]	5.50809e-05	1.80381e-05	1	P31930	UQCRC1	Cytochrome b-c1 complex subunit 1, mitochondrial OS=Homo sapiens OX=9606 GN=UQCRC1 PE=1 SV=3	0	1899.03	96.7	98.2	100.5	98.9	104.7	101.1	3	3.92	0.00248	31.9764	28
ADLVIVGAEGVVENGGIINK	1xTMT6plex [K20]; 1xTMT6plex [N-Term]	8.49915e-08	0	2	Q14232	EIF2B1	Translation initiation factor eIF-2B subunit alpha OS=Homo sapiens OX=9606 GN=EIF2B1 PE=1 SV=1	0	2425.41	94	94.7	94.6	114	104.4	98.3	3	5.87	0.00474	48.0925	81
ADLVWQPWEDLESSR	1xTMT6plex [N-Term]	0.000842395	8.78677e-05	1	Q6PJG2	ELMSAN1	ELM2 and SANT domain-containing protein 1 OS=Homo sapiens OX=9606 GN=ELMSAN1 PE=1 SV=2	0	2060.03	107	99.4	109.7	91.7	87.5	104.7	2	7.22	0.00743	48.8294	28
ADIWALGCLLYK	1xCarbamidomethyl [C8]; 1xTMT6plex [K12]; 1xTMT6plex [N-Term]	9.46068e-07	0	2	Q2M2I8; Q9NSY1	AAK1; BMP2K	AP2-associated protein kinase 1 OS=Homo sapiens OX=9606 GN=AAK1 PE=1 SV=3;BMP-2-inducible protein kinase OS=Homo sapiens OX=9606 GN=BMP2K PE=1 SV=2	0	1881.07	104.3	116.6	108.1	88.3	93.7	89.1	2	1.36	0.00128	52.4205	52
ADIWSFGITAIELATGAAPYHK	1xTMT6plex [K22]; 1xTMT6plex [N-Term]	8.98829e-10	0	2	O95747	OXSR1	Serine/threonine-protein kinase OSR1 OS=Homo sapiens OX=9606 GN=OXSR1 PE=1 SV=1	0	2790.52	97.7	112.4	108.7	97.1	94	90.1	3	4.28	0.00398	54.8845	87
ADIWSLGITAIELAK	1xTMT6plex [K15]; 1xTMT6plex [N-Term]	9.22701e-07	0	2	O00506; Q9P289	STK25; STK26	Serine/threonine-protein kinase 25 OS=Homo sapiens OX=9606 GN=STK25 PE=1 SV=1;Serine/threonine-protein kinase 26 OS=Homo sapiens OX=9606 GN=STK26 PE=1 SV=2	0	2059.22	100.2	101.9	98.2	101.2	97	101.5	2	7.07	0.00728	54.338	86
ADIWSLGITAIELAR	1xTMT6plex [N-Term]	1.42158e-08	0	3	Q9Y6E0	STK24	Serine/threonine-protein kinase 24 OS=Homo sapiens OX=9606 GN=STK24 PE=1 SV=1	0	1858.06	110.1	107.3	104.4	95.1	95.7	87.4	3	5.75	0.00356	53.8338	80
ADLYLEGK	1xTMT6plex [K8]; 1xTMT6plex [N-Term]	0.00116959	0.000132543	1	Q9NSE4	IARS2	Isoleucine--tRNA ligase, mitochondrial OS=Homo sapiens OX=9606 GN=IARS2 PE=1 SV=2	0	1366.8							2	3.5	0.00239	26.1178	33
ADMDQFTASISETPVDVR	1xTMT6plex [N-Term]	2.06209e-08	0	2	Q06481	APLP2	Amyloid-like protein 2 OS=Homo sapiens OX=9606 GN=APLP2 PE=1 SV=2	0	2211.08	99.2	89.5	87.5	109.6	105.9	108.3	2	1.35	0.00149	37.2682	86
ADMETLQR	1xTMT6plex [N-Term]	0.0114691	0.00097346	1	P26639	TARS1	Threonine--tRNA ligase 1, cytoplasmic OS=Homo sapiens OX=9606 GN=TARS1 PE=1 SV=3	0	1192.62							2	1.92	0.00115	14.936	17
ADMGGAATICSAIVSAAK	1xCarbamidomethyl [C10]; 1xTMT6plex [K18]; 1xTMT6plex [N-Term]	1.41559e-09	0	1	P28838	LAP3	Cytosol aminopeptidase OS=Homo sapiens OX=9606 GN=LAP3 PE=1 SV=3	0	2152.15	105.2	106.4	108.3	90.2	95.9	94	2	5.02	0.0054	39.2626	101
ADMGGAATICSAIVSAAK	1xCarbamidomethyl [C10]; 1xOxidation [M3]; 1xTMT6plex [K18]; 1xTMT6plex [N-Term]	0.000964463	0.000123391	1	P28838	LAP3	Cytosol aminopeptidase OS=Homo sapiens OX=9606 GN=LAP3 PE=1 SV=3	0	2168.15							3	4	0.00289	34.5523	11
ADMVETQQLMR	1xTMT6plex [N-Term]	4.4258e-05	1.80381e-05	1	Q9NZN4	EHD2	EH domain-containing protein 2 OS=Homo sapiens OX=9606 GN=EHD2 PE=1 SV=2	0	1550.79							2	1.64	0.00127	24.3335	16
ADMVIEAVFEDLSLK	1xTMT6plex [K15]; 1xTMT6plex [N-Term]	3.84266e-06	0	1	P40939	HADHA	Trifunctional enzyme subunit alpha, mitochondrial OS=Homo sapiens OX=9606 GN=HADHA PE=1 SV=2	0	2138.18	92.8	93	96	104.1	108.1	106	3	1.94	0.00139	55.4548	60
ADMVIEAVFEDLSLK	1xOxidation [M3]; 1xTMT6plex [K15]; 1xTMT6plex [N-Term]	1.71881e-05	0	2	P40939	HADHA	Trifunctional enzyme subunit alpha, mitochondrial OS=Homo sapiens OX=9606 GN=HADHA PE=1 SV=2	0	2154.18	98.5	98.3	98	107.1	94.7	103.4	3	1.12	0.0008	55.0434	39
ADNFEYSDPVDGSISR	1xTMT6plex [N-Term]	1.21532e-07	0	4	P36871	PGM1	Phosphoglucomutase-1 OS=Homo sapiens OX=9606 GN=PGM1 PE=1 SV=3	0	2000.94	92.6	101.7	92.1	108.3	102.4	102.9	2	2.92	0.00292	26.7944	64
ADNIEVFAQGHGIIQVDK	1xTMT6plex [K18]; 1xTMT6plex [N-Term]	1.49993e-08	0	2	P29144	TPP2	Tripeptidyl-peptidase 2 OS=Homo sapiens OX=9606 GN=TPP2 PE=1 SV=4	0	2412.33	97.8	98.7	98	103.2	102.4	99.8	3	2.85	0.00229	34.0569	82
ADNLVNLK	1xTMT6plex [K8]; 1xTMT6plex [N-Term]	0.109615	0.00447984	1	P17301	ITGA2	Integrin alpha-2 OS=Homo sapiens OX=9606 GN=ITGA2 PE=1 SV=1	0	1344.83							2	1.91	0.00128	24.7292	5
ADNTCGFAK	1xCarbamidomethyl [C5]; 1xTMT6plex [K9]; 1xTMT6plex [N-Term]	0.000167783	2.77511e-05	1	P38935	IGHMBP2	DNA-binding protein SMUBP-2 OS=Homo sapiens OX=9606 GN=IGHMBP2 PE=1 SV=3	0	1441.75	104.3	97.3	100.7	98.6	99.9	99.3	2	1.22	0.00088	15.4971	38
ADNVVNIAR	1xTMT6plex [N-Term]	0.000479732	3.92285e-05	1	Q92621	NUP205	Nuclear pore complex protein Nup205 OS=Homo sapiens OX=9606 GN=NUP205 PE=1 SV=3	0	1200.69	98.4	98.2	100	101.6	101	100.8	2	1.78	0.00107	16.4733	31
ADPAELR	1xTMT6plex [N-Term]	0.0824483	0.0036435	1	Q9UJS0	SLC25A13	Calcium-binding mitochondrial carrier protein Aralar2 OS=Homo sapiens OX=9606 GN=SLC25A13 PE=1 SV=2	0	1000.56	108.5	96.6	93.8	97	101.7	102.4	2	2.51	0.00126	12.1527	12
ADPAFGLESSGIAGTTSDEPERIEESGNDEAR	1xTMT6plex [N-Term]	0.000117801	2.77511e-05	1	Q8TAQ2	SMARCC2	SWI/SNF complex subunit SMARCC2 OS=Homo sapiens OX=9606 GN=SMARCC2 PE=1 SV=1	1	3536.65	107.1	118.8	95	102.4	87.7	88.9	3	1.24	0.00146	31.6366	50
ADPDNLQALHTLHLR	1xTMT6plex [N-Term]	5.24166e-05	1.80381e-05	1	O15484	CAPN5	Calpain-5 OS=Homo sapiens OX=9606 GN=CAPN5 PE=1 SV=2	0	1943.07							4	0.9	0.00044	23.6388	40
ADPDVTLAGQEAIFILAR	1xTMT6plex [N-Term]	5.49399e-08	0	2	Q9NR33	POLE4	DNA polymerase epsilon subunit 4 OS=Homo sapiens OX=9606 GN=POLE4 PE=1 SV=2	0	2129.18	104.4	95.2	97.1	103.3	100.1	99.9	3	5.51	0.00391	50.8019	65
ADPEAAWEPTEAEAR	1xTMT6plex [N-Term]	0.000141945	2.77511e-05	1	Q9UBT2	UBA2	SUMO-activating enzyme subunit 2 OS=Homo sapiens OX=9606 GN=UBA2 PE=1 SV=2	0	1871.9	102.4	102.4	101.2	97.6	96.2	100.2	2	1.68	0.00158	24.2294	44
ADPEELFTK	1xTMT6plex [K9]; 1xTMT6plex [N-Term]	0.0119008	0.000989726	2	Q9Y6E0	STK24	Serine/threonine-protein kinase 24 OS=Homo sapiens OX=9606 GN=STK24 PE=1 SV=1	0	1507.84	104.1	101.8	100.8	95.2	94.4	103.7	3	2.67	0.00134	31.7554	28
ADPEVCCFITK	1xAcetyl [N-Term]; 2xCarbamidomethyl [C6; C7]; 1xTMT6plex [K11]; 1xTMT6plex [N-Term]	0.00112085	0.000132543	1	Q7Z2W4	ZC3HAV1	Zinc finger CCCH-type antiviral protein 1 OS=Homo sapiens OX=9606 GN=ZC3HAV1 PE=1 SV=3	0	1839.94	92.1	86.5	96.6	119.7	97.2	107.8	2	-124547	-114.579	38.1263	65
ADPFSFEGPEIVDCDGCTIDWK	2xCarbamidomethyl [C14; C17]; 1xTMT6plex [K22]; 1xTMT6plex [N-Term]	0.00052083	3.92285e-05	1	Q99733	NAP1L4	Nucleosome assembly protein 1-like 4 OS=Homo sapiens OX=9606 GN=NAP1L4 PE=1 SV=1	0	3016.41	104.3	99.9	92.4	98.2	103.7	101.5	3	1.49	0.0015	49.8167	47
ADPHSLCYDITVIPK	1xCarbamidomethyl [C7]; 1xTMT6plex [K15]; 1xTMT6plex [N-Term]	9.08126e-05	2.77511e-05	1	Q9BZM5	ULBP2	UL16-binding protein 2 OS=Homo sapiens OX=9606 GN=ULBP2 PE=1 SV=1	0	2187.19	101.6	89.9	95.3	108.8	103.8	100.7	3	1.59	0.00116	32.5564	7
ADPPATEK	1xTMT6plex [K8]; 1xTMT6plex [N-Term]	0.0602728	0.00302903	1	Q9HAV7	GRPEL1	GrpE protein homolog 1, mitochondrial OS=Homo sapiens OX=9606 GN=GRPEL1 PE=1 SV=2	0	1286.74	103.1	102.3	111.6	93.9	97.1	92	2	3.23	0.00208	10.5268	16
ADPQEAINCLMR	1xCarbamidomethyl [C9]; 1xTMT6plex [N-Term]	0.00278341	0.000222687	1	P54920	NAPA	Alpha-soluble NSF attachment protein OS=Homo sapiens OX=9606 GN=NAPA PE=1 SV=3	0	1646.82	103.5	104.3	111.9	90.7	94.2	95.4	2	3.24	0.00267	32.7545	13
ADPSHFELLK	1xTMT6plex [K10]; 1xTMT6plex [N-Term]	7.2616e-05	2.77511e-05	2	Q15418	RPS6KA1	Ribosomal protein S6 kinase alpha-1 OS=Homo sapiens OX=9606 GN=RPS6KA1 PE=1 SV=2	0	1614.93	99.8	97.1	98.8	101.5	103.7	99.1	2	3.64	0.00294	26.1097	37
ADPSLLGFSVNASSER	1xTMT6plex [N-Term]	0.000152497	2.77511e-05	1	Q6Y7W6	GIGYF2	GRB10-interacting GYF protein 2 OS=Homo sapiens OX=9606 GN=GIGYF2 PE=1 SV=1	0	1878.98	100	96.3	96.4	103.5	94	109.8	2	3.58	0.00336	34.5149	35
ADPSLNPEQLK	1xTMT6plex [K11]; 1xTMT6plex [N-Term]	8.89175e-06	0	2	Q9UNF0	PACSIN2	Protein kinase C and casein kinase substrate in neurons protein 2 OS=Homo sapiens OX=9606 GN=PACSIN2 PE=1 SV=2	0	1669.95	103.2	109.3	107.6	96.3	90.4	93.3	3	2.91	0.00162	24.915	36
ADPSLNPEQLKK	2xTMT6plex [K11; K12]; 1xTMT6plex [N-Term]	0.010472	0.000831522	1	Q9UNF0	PACSIN2	Protein kinase C and casein kinase substrate in neurons protein 2 OS=Homo sapiens OX=9606 GN=PACSIN2 PE=1 SV=2	1	2027.21							3	1.91	0.00129	22.114	1
ADPSIVQALSLYDGLV	1xTMT6plex [N-Term]	6.48338e-05	2.77511e-05	2	P62166	NCS1	Neuronal calcium sensor 1 OS=Homo sapiens OX=9606 GN=NCS1 PE=1 SV=2	0	1890.04	96.1	101.5	112.6	86.6	94.1	109	3	3.16	0.00199	55.1743	47
ADPSQFELLK	1xTMT6plex [K10]; 1xTMT6plex [N-Term]	6.44378e-05	2.77511e-05	1	P51812	RPS6KA3	Ribosomal protein S6 kinase alpha-3 OS=Homo sapiens OX=9606 GN=RPS6KA3 PE=1 SV=1	0	1605.93	108.4	101.1	107.6	98	94.6	90.4	2	4.25	0.00341	33.8933	31
ADPWQECMDYAVTLAR	1xAcetyl [N-Term]; 1xCarbamidomethyl [C7]; 1xTMT6plex [N-Term]	8.71725e-05	2.77511e-05	1	P29218	IMPA1	Inositol monophosphatase 1 OS=Homo sapiens OX=9606 GN=IMPA1 PE=1 SV=1	0	2197.03							2	-104305	-114.581	51.7172	61
ADQDSEAMK	1xTMT6plex [K9]; 1xTMT6plex [N-Term]	0.000151946	2.77511e-05	1	Q9Y490	TLN1	Talin-1 OS=Homo sapiens OX=9606 GN=TLN1 PE=1 SV=3	0	1452.74	104.3	92.1	95.3	100.6	106.6	101.2	2	2.39	0.00174	12.3793	25
ADQDSEAMKR	1xTMT6plex [K9]; 1xTMT6plex [N-Term]	0.00122064	0.000132543	2	Q9Y490	TLN1	Talin-1 OS=Homo sapiens OX=9606 GN=TLN1 PE=1 SV=3	1	1608.84	94	88.9	93.7	107.6	111.1	104.6	2	0.7	0.00056	9.4375	21
ADQELLMYSHDNIICGITSVAFSR	1xCarbamidomethyl [C15]; 1xTMT6plex [N-Term]	7.91284e-07	0	3	P62879	GNB2	Guanine nucleotide-binding protein G(I)/G(S)/G(T) subunit beta-2 OS=Homo sapiens OX=9606 GN=GNB2 PE=1 SV=3	0	2969.47	100.2	101.8	98	89.6	102.8	107.6	3	5.87	0.00581	50.2258	74
ADQELMTYSHDNIICGITSVSFSK	1xCarbamidomethyl [C15]; 1xTMT6plex [K24]; 1xTMT6plex [N-Term]	1.27712e-06	0	1	P62873	GNB1	Guanine nucleotide-binding protein G(I)/G(S)/G(T) subunit beta-1 OS=Homo sapiens OX=9606 GN=GNB1 PE=1 SV=3	0	3174.59	86.9	106.9	96.3	95.5	100.1	114.4	3	1.85	0.00196	44.2901	59
ADQFEYVMYGK	1xTMT6plex [K11]; 1xTMT6plex [N-Term]	7.58794e-06	0	2	P52434	POLR2H	DNA-directed RNA polymerases I, II, and III subunit RPABC3 OS=Homo sapiens OX=9606 GN=POLR2H PE=1 SV=4	0	1808.93	98.8	104.9	102.4	100.6	100.1	93.1	2	1.37	0.00124	36.2593	55
ADQFLVGTSR	1xTMT6plex [N-Term]	5.35674e-05	1.80381e-05	2	Q9HC35	EML4	Echinoderm microtubule-associated protein-like 4 OS=Homo sapiens OX=9606 GN=EML4 PE=1 SV=3	0	1322.73	91.4	100.1	110.1	93.1	105	100.2	2	1.96	0.0013	22.8438	33
ADQLDYENFR	1xTMT6plex [N-Term]	5.04959e-05	1.80381e-05	1	Q8NI27	THOC2	THO complex subunit 2 OS=Homo sapiens OX=9606 GN=THOC2 PE=1 SV=2	0	1499.73	100.3	99.9	100.5	100.7	100.5	98.1	2	3.94	0.00295	25.0157	33
ADQIETQQLMR	1xTMT6plex [N-Term]	6.42701e-06	0	2	Q9H4M9	EHD1	EH domain-containing protein 1 OS=Homo sapiens OX=9606 GN=EHD1 PE=1 SV=2	0	1561.82	104.4	99.1	99.6	95.5	100.8	100.5	2	3.47	0.00271	21.2878	51
ADQIETQQLMR	1xOxidation [M10]; 1xTMT6plex [N-Term]	0.0174099	0.00150314	2	Q9H4M9	EHD1	EH domain-containing protein 1 OS=Homo sapiens OX=9606 GN=EHD1 PE=1 SV=2	0	1577.82	100.8	102.4	103	96.6	97.5	99.8	2	3.41	0.00269	16.2731	15
ADQLTEEQIAEFK	1xAcetyl [N-Term]; 1xTMT6plex [K13]; 1xTMT6plex [N-Term]	9.13885e-05	2.77511e-05	8	P0DP23	CALM1	Calmodulin-1 OS=Homo sapiens OX=9606 GN=CALM1 PE=1 SV=1	0	2022.08	96.7	100.3	103.2	100.7	99.3	99.9	2	-113329	-114.581	40.1582	86
ADQLYLENIDEFVTDQNK	1xAcetyl [N-Term]; 1xTMT6plex [K18]; 1xTMT6plex [N-Term]	3.16042e-05	0	2	Q15054	POLD3	DNA polymerase delta subunit 3 OS=Homo sapiens OX=9606 GN=POLD3 PE=1 SV=2	0	2655.36	105.1	103.8	101.3	96.5	95.8	97.5	2	-86300.3	-114.579	53.2519	82
ADQPKPISPLK	1xAcetyl [N-Term]; 2xTMT6plex [K5; K11]; 1xTMT6plex [N-Term]	0.0117071	0.000981532	1	O43772	SLC25A20	Mitochondrial carnitine/acylcarnitine carrier protein OS=Homo sapiens OX=9606 GN=SLC25A20 PE=1 SV=1	0	1923.19	101.1	101.9	94.2	106.8	96.8	99.2	2	-119150	-114.574	22.4525	8
ADQQYECVAEIGEGAYGK	1xCarbamidomethyl [C7]; 1xTMT6plex [K18]; 1xTMT6plex [N-Term]	7.91248e-08	0	1	Q00534	CDK6	Cyclin-dependent kinase 6 OS=Homo sapiens OX=9606 GN=CDK6 PE=1 SV=1	0	2446.2	101.7	88.3	93.3	105.4	110.4	101	2	2.91	0.00356	32.5209	85
ADQVDTQQLMR	1xTMT6plex [N-Term]	7.45523e-06	0	1	Q9H223	EHD4	EH domain-containing protein 4 OS=Homo sapiens OX=9606 GN=EHD4 PE=1 SV=1	0	1533.79	97.5	106.3	115.8	88.9	98.9	92.7	2	2.53	0.00194	19.5459	41
ADRDESSPYAAMLAAQDVAQR	1xTMT6plex [N-Term]	1.18881e-08	0	4	P62263	RPS14	40S ribosomal protein S14 OS=Homo sapiens OX=9606 GN=RPS14 PE=1 SV=3	1	2494.22	97.3	104.8	103.6	102.2	93.6	98.5	3	2.53	0.00211	29.4432	68
ADRDESSPYAAMLAAQDVAQR	1xOxidation [M12]; 1xTMT6plex [N-Term]	9.63244e-08	0	1	P62263	RPS14	40S ribosomal protein S14 OS=Homo sapiens OX=9606 GN=RPS14 PE=1 SV=3	1	2510.21	99.3	110.1	105.2	97.6	95.9	92	3	1.82	0.00152	20.9301	67
ADRETVAVKPTENNEEEFTSK	2xTMT6plex [K9; K21]; 1xTMT6plex [N-Term]	1.14327e-06	0	1	O60841	EIF5B	Eukaryotic translation initiation factor 5B OS=Homo sapiens OX=9606 GN=EIF5B PE=1 SV=4	1	3081.63	110.3	102.8	101.6	98.2	94.3	92.8	4	0.8	0.00062	19.0229	45
ADRPSSLPLDFNDEFSDLDGVVQQR	1xTMT6plex [N-Term]	2.65953e-07	0	1	Q96HH9	GRAMD2B	GRAM domain-containing protein 2B OS=Homo sapiens OX=9606 GN=GRAMD2B PE=1 SV=1	0	3049.51	106.1	101.4	94.1	104.8	96.7	96.9	3	7.67	0.0078	43.4058	34
ADSAVSQEQLR	1xTMT6plex [N-Term]	1.53358e-05	0	1	Q9UKS6	PACSIN3	Protein kinase C and casein kinase substrate in neurons protein 3 OS=Homo sapiens OX=9606 GN=PACSIN3 PE=1 SV=2	0	1432.76	104.2	94.4	98.2	99.4	99.9	103.9	2	2.46	0.00176	12.7206	55
ADSDGPEFK	1xTMT6plex [K9]; 1xTMT6plex [N-Term]	0.000352318	3.92285e-05	1	Q709C8	VPS13C	Vacuolar protein sorting-associated protein 13C OS=Homo sapiens OX=9606 GN=VPS13C PE=1 SV=1	0	1423.75	91.4	94.7	94.8	105.6	107.7	105.9	2	2.53	0.0018	17.2674	19
ADSEQLAR	1xTMT6plex [N-Term]	0.0037908	0.000283562	1	O75116	ROCK2	Rho-associated protein kinase 2 OS=Homo sapiens OX=9606 GN=ROCK2 PE=1 SV=4	0	1118.6	100.4	110.1	102.7	91.1	96.5	99.2	2	2.03	0.00113	9.6129	10
ADSEQPSK	1xTMT6plex [K8]; 1xTMT6plex [N-Term]	0.00146494	0.000142151	1	Q9Y3Z3	SAMHD1	Deoxynucleoside triphosphate triphosphohydrolase SAMHD1 OS=Homo sapiens OX=9606 GN=SAMHD1 PE=1 SV=2	0	1319.72	94	97.3	92.4	105.9	105.1	105.2	2	1.41	0.00093	9.1878	26
ADSFYIIESGEVSILIR	1xTMT6plex [N-Term]	0.0301624	0.0020481	2	P13861	PRKAR2A	cAMP-dependent protein kinase type II-alpha regulatory subunit OS=Homo sapiens OX=9606 GN=PRKAR2A PE=1 SV=2	0	2141.17							3	9.87	0.00704	58.8992	28
ADSGLLLK	1xAcetyl [N-Term]; 1xTMT6plex [K8]; 1xTMT6plex [N-Term]	0.113907	0.00455666	1	Q5SY16	NOL9	Polynucleotide 5'-hydroxyl-kinase NOL9 OS=Homo sapiens OX=9606 GN=NOL9 PE=1 SV=1	0	1316.82	99.9	90	102.4	97.7	97.4	112.7	2	-174025	-114.58	33.6273	17
ADSGPTQPPLSLSPAPETK	1xTMT6plex [K19]; 1xTMT6plex [N-Term]	8.7455e-07	0	1	O15027	SEC16A	Protein transport protein Sec16A OS=Homo sapiens OX=9606 GN=SEC16A PE=1 SV=4	0	2351.29	105.4	98.6	109	94.4	95.7	97	3	0.08	6e-05	26.6391	39
ADSGTAGGAALAAPAPGPGSGGPGPR	1xAcetyl [N-Term]; 1xTMT6plex [N-Term]	3.1189e-05	0	1	Q96C90	PPP1R14B	Protein phosphatase 1 regulatory subunit 14B OS=Homo sapiens OX=9606 GN=PPP1R14B PE=1 SV=3	0	2388.21							2	-95952.5	-114.577	22.1707	77
ADSLLAVVK	1xTMT6plex [K9]; 1xTMT6plex [N-Term]	9.31425e-05	2.77511e-05	2	Q15424; Q14151	SAFB; SAFB2	Scaffold attachment factor B1 OS=Homo sapiens OX=9606 GN=SAFB PE=1 SV=4;Scaffold attachment factor B2 OS=Homo sapiens OX=9606 GN=SAFB2 PE=1 SV=1	0	1373.88	104	101.7	110.6	91.6	97	95.2	2	2.08	0.00143	34.0982	58
ADSLSSLVTR	1xTMT6plex [N-Term]	0.00127415	0.000142151	1	Q13753	LAMC2	Laminin subunit gamma-2 OS=Homo sapiens OX=9606 GN=LAMC2 PE=1 SV=2	0	1277.73	93.6	88.3	89.2	113.5	110.3	105.1	2	0.76	0.00049	25.5851	18
ADSLVEGTSSR	1xTMT6plex [N-Term]	0.00165498	0.000174676	1	Q8N1G2	CMTR1	Cap-specific mRNA (nucleoside-2'-O-)-methyltransferase 1 OS=Homo sapiens OX=9606 GN=CMTR1 PE=1 SV=1	0	1350.71	98.9	102.3	103	93.9	90	112	2	4.33	0.00292	14.6467	26
ADSPSIDYAELLQHFEK	1xTMT6plex [K17]; 1xTMT6plex [N-Term]	3.43889e-08	0	2	Q08AM6	VAC14	Protein VAC14 homolog OS=Homo sapiens OX=9606 GN=VAC14 PE=1 SV=1	0	2421.27	100.9	101	97.9	98.8	102.2	99.2	3	3.87	0.00312	43.8056	59
ADSSSVLPSPLSISTK	1xTMT6plex [K16]; 1xTMT6plex [N-Term]	6.46355e-05	2.77511e-05	1	Q66K14	TBC1D9B	TBC1 domain family member 9B OS=Homo sapiens OX=9606 GN=TBC1D9B PE=1 SV=3	0	2047.17	97.6	98.8	96	110.1	100.5	97	2	3	0.00307	34.3544	51
ADSSTTK	1xTMT6plex [K7]; 1xTMT6plex [N-Term]	0.0123483	0.0010161	1	P35659	DEK	Protein DEK OS=Homo sapiens OX=9606 GN=DEK PE=1 SV=1	0	1167.66	103.1	107.6	105.9	92.9	97.4	93.2	2	0.75	0.00044	8.0211	22
ADSTYGSSSLTYTLSLLGGPEAEDPAPR	1xTMT6plex [N-Term]	9.42217e-09	0	1	O00221	NFKBIE	NF-kappa-B inhibitor epsilon OS=Homo sapiens OX=9606 GN=NFKBIE PE=1 SV=3	0	3084.52	115.9	85.1	89.8	108	91.4	109.7	3	4.28	0.0044	49.1423	85
ADSVSSSNIK	1xTMT6plex [K10]; 1xTMT6plex [N-Term]	9.46352e-05	2.77511e-05	1	Q53F19	NCBP3	Nuclear cap-binding protein subunit 3 OS=Homo sapiens OX=9606 GN=NCBP3 PE=1 SV=2	0	1465.83	105	98.9	107.2	90.8	97.1	100.9	2	1.48	0.00109	13.9366	28
ADSVVVLLCR	1xCarbamidomethyl [C9]; 1xTMT6plex [N-Term]	2.02671e-05	0	1	Q92900	UPF1	Regulator of nonsense transcripts 1 OS=Homo sapiens OX=9606 GN=UPF1 PE=1 SV=2	0	1360.78	108.6	96.2	105.4	93.8	97.1	98.9	2	2.27	0.00155	33.2815	52
ADSWVEKEEPAPSN	1xTMT6plex [K7]; 1xTMT6plex [N-Term]	0.000251533	2.77511e-05	2	Q8N163	CCAR2	Cell cycle and apoptosis regulator protein 2 OS=Homo sapiens OX=9606 GN=CCAR2 PE=1 SV=2	1	2017.03	109.6	95.9	103.9	97.4	96.7	96.3	2	2.37	0.00239	24.4721	37
ADTDLFMECEEEELEPWQK	1xAcetyl [N-Term]; 1xCarbamidomethyl [C9]; 1xTMT6plex [K19]; 1xTMT6plex [N-Term]	0.020577	0.00167179	1	Q7Z3K3	POGZ	Pogo transposable element with ZNF domain OS=Homo sapiens OX=9606 GN=POGZ PE=1 SV=2	0	2899.34	108.6	91.7	109.6	100.7	83.7	105.8	3	-79035.6	-76.3837	52.7351	45
ADTFPQVLK	1xTMT6plex [K9]; 1xTMT6plex [N-Term]	0.00926665	0.00067718	1	Q8IV48	ERI1	3'-5' exoribonuclease 1 OS=Homo sapiens OX=9606 GN=ERI1 PE=1 SV=3	0	1476.88	101.2	108.6	112.6	89.6	90.5	97.4	3	3.97	0.00195	29.5166	13
ADTGLETSTR	1xTMT6plex [N-Term]	0.000121849	2.77511e-05	1	P49959	MRE11	Double-strand break repair protein MRE11 OS=Homo sapiens OX=9606 GN=MRE11 PE=1 SV=3	0	1279.67	95.9	98.6	103.2	103.6	102.4	96.4	2	2.19	0.0014	11.0937	42
ADTLDPALLRPGR	1xTMT6plex [N-Term]	1.55497e-05	0	4	P43686	PSMC4	26S proteasome regulatory subunit 6B OS=Homo sapiens OX=9606 GN=PSMC4 PE=1 SV=2	0	1623.94	97.3	103.3	101.5	98	98.7	101.2	2	5.15	0.00418	23.8159	36
ADTLGELDLER	1xTMT6plex [N-Term]	4.68849e-06	0	1	Q86TX2	ACOT1	Acyl-coenzyme A thioesterase 1 OS=Homo sapiens OX=9606 GN=ACOT1 PE=1 SV=1	0	1460.78	93.3	104.2	113.6	85.7	104	99.2	2	1.3	0.00095	29.6352	76
ADTLTDEINFLR	1xTMT6plex [N-Term]	2.66323e-06	0	1	P04259	KRT6B	Keratin, type II cytoskeletal 6B OS=Homo sapiens OX=9606 GN=KRT6B PE=1 SV=5	0	1636.87	139.8	241.1	36.8	46.9	38.2	97.2	2	2.06	0.00168	40.9596	37
ADTLTLEER	1xTMT6plex [N-Term]	0.000254675	2.77511e-05	1	Q9UHD8	SEPTIN9	Septin-9 OS=Homo sapiens OX=9606 GN=SEPTIN9 PE=1 SV=2	0	1276.69							2	2.21	0.00141	18.7679	20
ADTLTLK	1xTMT6plex [K7]; 1xTMT6plex [N-Term]	0.0167441	0.00144937	1	Q15019	SEPTIN2	Septin-2 OS=Homo sapiens OX=9606 GN=SEPTIN2 PE=1 SV=1	0	1219.77	102.6	99.2	103.3	98.9	100	95.9	2	3.16	0.00193	21.6397	29
ADTLTPEECQQFK	1xCarbamidomethyl [C9]; 1xTMT6plex [K13]; 1xTMT6plex [N-Term]	5.67806e-06	0	4	Q16181	SEPTIN7	Septin-7 OS=Homo sapiens OX=9606 GN=SEPTIN7 PE=1 SV=2	0	2025.04	96	98.1	99.1	100.5	100.4	105.9	2	1.56	0.00158	23.977	69
ADTLTPEECQQFKK	1xCarbamidomethyl [C9]; 2xTMT6plex [K13; K14]; 1xTMT6plex [N-Term]	0.000373074	3.92285e-05	1	Q16181	SEPTIN7	Septin-7 OS=Homo sapiens OX=9606 GN=SEPTIN7 PE=1 SV=2	1	2382.29	83.2	85.7	91.3	113.1	110.4	116.4	3	4.62	0.00367	21.7065	15
ADTNQLADK	1xTMT6plex [K9]; 1xTMT6plex [N-Term]	0.000112418	2.77511e-05	1	O43493	TGOLN2	Trans-Golgi network integral membrane protein 2 OS=Homo sapiens OX=9606 GN=TGOLN2 PE=1 SV=4	0	1433.8	82.5	80.7	81.1	131.8	108	115.8	2	3.03	0.00217	14.3349	45
ADTPSLGEGPEK	1xTMT6plex [K12]; 1xTMT6plex [N-Term]	1.67519e-06	0	1	Q15833	STXBP2	Syntaxin-binding protein 2 OS=Homo sapiens OX=9606 GN=STXBP2 PE=1 SV=2	0	1658.9	109.5	104.7	97	92	99.5	97.2	2	3.13	0.00259	18.6153	65
ADTQTYQPYNK	1xTMT6plex [K11]; 1xTMT6plex [N-Term]	8.82939e-06	0	2	P84090	ERH	Enhancer of rudimentary homolog OS=Homo sapiens OX=9606 GN=ERH PE=1 SV=1	0	1786.94	118.6	147.1	124.3	72.9	74.9	62.2	2	1.07	0.00096	16.6045	43
ADTQTYQPYNKDWIK	2xTMT6plex [K11; K15]; 1xTMT6plex [N-Term]	3.04742e-05	0	1	P84090	ERH	Enhancer of rudimentary homolog OS=Homo sapiens OX=9606 GN=ERH PE=1 SV=1	1	2558.39	101.7	94.5	105.5	101.2	102.6	94.4	3	0.73	0.00062	27.4054	11
ADTQYILPNDIGVSSLDCR	1xAcetyl [N-Term]; 1xCarbamidomethyl [C18]; 1xTMT6plex [N-Term]	6.11641e-05	1.80381e-05	2	Q9NY33	DPP3	Dipeptidyl peptidase 3 OS=Homo sapiens OX=9606 GN=DPP3 PE=1 SV=2	0	2408.2							2	-95156.1	-114.577	45.2674	58
ADTSSQGALVFLSK	1xTMT6plex [K14]; 1xTMT6plex [N-Term]	6.66438e-08	0	2	Q7Z417	NUFIP2	Nuclear fragile X mental retardation-interacting protein 2 OS=Homo sapiens OX=9606 GN=NUFIP2 PE=1 SV=1	0	1882.07	92.1	89.4	98.5	109.6	104.5	105.9	2	3.47	0.00326	35.4826	64
ADTVGLACEAINR	1xCarbamidomethyl [C8]; 1xTMT6plex [N-Term]	1.92081e-07	0	1	O75165	DNAJC13	DnaJ homolog subfamily C member 13 OS=Homo sapiens OX=9606 GN=DNAJC13 PE=1 SV=5	0	1618.84	94.1	99.6	93.5	100	106.9	105.9	2	3.51	0.00284	24.8274	51
ADTWDAK	1xTMT6plex [K7]; 1xTMT6plex [N-Term]	0.0133509	0.00109815	1	Q14669	TRIP12	E3 ubiquitin-protein ligase TRIP12 OS=Homo sapiens OX=9606 GN=TRIP12 PE=1 SV=1	0	1264.69	101.2	93.8	103.9	95.9	100	105.2	2	0.29	0.00018	18.1974	14
ADVDISGPK	1xTMT6plex [K9]; 1xTMT6plex [N-Term]	0.00226728	0.000201691	1	Q09666	AHNAK	Neuroblast differentiation-associated protein AHNAK OS=Homo sapiens OX=9606 GN=AHNAK PE=1 SV=2	0	1359.79							3	1.57	0.00071	18.3934	39
ADVDPDTLLEWLQMGQGDER	1xAcetyl [N-Term]; 1xTMT6plex [N-Term]	9.11e-05	2.77511e-05	1	Q9ULT8	HECTD1	E3 ubiquitin-protein ligase HECTD1 OS=Homo sapiens OX=9606 GN=HECTD1 PE=1 SV=3	0	2559.22							2	-89538.8	-114.575	55.5516	58
ADVDVQPYAFTTK	1xTMT6plex [K13]; 1xTMT6plex [N-Term]	4.51458e-07	0	2	Q9BZE4	GTPBP4	Nucleolar GTP-binding protein 1 OS=Homo sapiens OX=9606 GN=GTPBP4 PE=1 SV=3	0	1913.04	107.6	96.8	118.9	95.1	90.8	90.8	2	2.04	0.00195	30.8496	54
ADVDVSGPK	1xTMT6plex [K9]; 1xTMT6plex [N-Term]	0.000161085	2.77511e-05	2	Q09666	AHNAK	Neuroblast differentiation-associated protein AHNAK OS=Homo sapiens OX=9606 GN=AHNAK PE=1 SV=2	0	1345.77	97.7	95.4	98.1	103.4	106.8	98.6	2	1.18	0.00079	15.8128	56
ADVEEEFLAFR	1xTMT6plex [N-Term]	7.66869e-06	0	1	P46013	MKI67	Proliferation marker protein Ki-67 OS=Homo sapiens OX=9606 GN=MKI67 PE=1 SV=2	0	1554.8	105.3	100.3	103.7	98.5	99.7	92.6	2	3.43	0.00266	41.3946	43
ADVELER	1xTMT6plex [N-Term]	0.00966938	0.000746397	1	Q6R327	RICTOR	Rapamycin-insensitive companion of mTOR OS=Homo sapiens OX=9606 GN=RICTOR PE=1 SV=1	0	1060.58							2	-0.63	-0.00034	13.7174	16
ADVFHAYLSLLK	1xTMT6plex [K12]; 1xTMT6plex [N-Term]	4.49294e-06	0	2	Q86VP6	CAND1	Cullin-associated NEDD8-dissociated protein 1 OS=Homo sapiens OX=9606 GN=CAND1 PE=1 SV=2	0	1835.08	103.7	115.2	121.3	88.5	86.3	84.9	2	3.75	0.00344	48.238	45
ADVGDALETALEQLNR	1xTMT6plex [N-Term]	5.13463e-07	0	1	Q9P2E5	CHPF2	Chondroitin sulfate glucuronyltransferase OS=Homo sapiens OX=9606 GN=CHPF2 PE=2 SV=2	0	1944.02	101.2	103.5	106.9	97.3	85.2	105.9	3	4.64	0.00301	51.6116	75
ADVGFAMGIAGTDVAK	1xTMT6plex [K16]; 1xTMT6plex [N-Term]	1.32819e-08	0	2	P20020; P23634	ATP2B1; ATP2B4	Plasma membrane calcium-transporting ATPase 1 OS=Homo sapiens OX=9606 GN=ATP2B1 PE=1 SV=4;Plasma membrane calcium-transporting ATPase 4 OS=Homo sapiens OX=9606 GN=ATP2B4 PE=1 SV=2	0	1981.08	92	96	90.1	107.9	109.4	104.6	2	5.58	0.00553	37.5832	93
ADVLAFPSSGFTDLAEIVSR	1xTMT6plex [N-Term]	2.80942e-06	0	1	Q8IY17	PNPLA6	Neuropathy target esterase OS=Homo sapiens OX=9606 GN=PNPLA6 PE=1 SV=3	0	2324.23	106.7	102.1	101.8	95.9	93.1	100.3	3	0.85	0.00066	53.1036	47
ADVLFIAPR	1xTMT6plex [N-Term]	0.000216432	2.77511e-05	2	Q92542	NCSTN	Nicastrin OS=Homo sapiens OX=9606 GN=NCSTN PE=1 SV=2	0	1230.74	99.8	89.1	90.8	105.3	107.5	107.5	2	1.39	0.00085	31.9186	33
ADVIITSGGVSMGEK	1xTMT6plex [K15]; 1xTMT6plex [N-Term]	4.09917e-07	0	1	Q9NQX3	GPHN	Gephyrin OS=Homo sapiens OX=9606 GN=GPHN PE=1 SV=1	0	1922.07							2	3.33	0.0032	30.9287	32
ADVIPVHYYLIPPPTK	1xTMT6plex [K16]; 1xTMT6plex [N-Term]	5.55863e-06	0	1	P29144	TPP2	Tripeptidyl-peptidase 2 OS=Homo sapiens OX=9606 GN=TPP2 PE=1 SV=4	0	2281.34	87.3	103.2	104	96.3	101.4	107.8	3	2.19	0.00166	36.3878	35
ADVIQATGDAICIFR	1xCarbamidomethyl [C12]; 1xTMT6plex [N-Term]	1.37164e-08	0	5	Q08945	SSRP1	FACT complex subunit SSRP1 OS=Homo sapiens OX=9606 GN=SSRP1 PE=1 SV=1	0	1878.99	100.5	97.9	101.1	96.9	99.2	104.4	2	2.3	0.00216	44.0729	61
ADVLSEEAILK	1xTMT6plex [K11]; 1xTMT6plex [N-Term]	4.49294e-06	0	2	Q9Y6E2	BZW2	Basic leucine zipper and W2 domain-containing protein 2 OS=Homo sapiens OX=9606 GN=BZW2 PE=1 SV=1	0	1645.98	109.9	108.2	119.9	81.5	90.3	90.2	2	4.18	0.00344	34.4609	59
ADVLSSFLDEK	1xTMT6plex [K11]; 1xTMT6plex [N-Term]	1.11702e-05	0	2	Q9H0K6	PUS7L	Pseudouridylate synthase 7 homolog-like protein OS=Homo sapiens OX=9606 GN=PUS7L PE=1 SV=1	0	1681.94	105.7	103	113.8	89.1	92.5	95.9	2	1.41	0.00119	45.1894	45
ADVLSVLR	1xAcetyl [N-Term]; 1xTMT6plex [N-Term]	0.00297659	0.000232546	1	Q6P1J9	CDC73	Parafibromin OS=Homo sapiens OX=9606 GN=CDC73 PE=1 SV=1	0	1143.69							2	-200368	-114.58	42.0022	29
ADVLTTGAGNPVGDK	1xTMT6plex [K15]; 1xTMT6plex [N-Term]	1.47621e-05	0	1	P04040	CAT	Catalase OS=Homo sapiens OX=9606 GN=CAT PE=1 SV=3	0	1873.04							3	1.77	0.0011	24.7222	35
ADVQSIIGLQR	1xTMT6plex [N-Term]	4.08729e-05	0	2	Q13263	TRIM28	Transcription intermediary factor 1-beta OS=Homo sapiens OX=9606 GN=TRIM28 PE=1 SV=5	0	1428.84	164.6	81.8	89.2	91.8	81.7	90.9	3	4.19	0.00199	30.1138	36
ADVSAWK	1xTMT6plex [K7]; 1xTMT6plex [N-Term]	0.00771422	0.000562563	1	Q9GZR7	DDX24	ATP-dependent RNA helicase DDX24 OS=Homo sapiens OX=9606 GN=DDX24 PE=1 SV=1	0	1234.72	108.1	101.2	105.6	98.9	95.5	90.8	2	3.71	0.00229	22.8285	31
ADVSFVLFFDCNNEICIER	2xCarbamidomethyl [C11; C16]; 1xTMT6plex [N-Term]	0.0683625	0.00329957	1	P30085	CMPK1	UMP-CMP kinase OS=Homo sapiens OX=9606 GN=CMPK1 PE=1 SV=3	0	2577.23							3	1.6	0.00137	57.6269	9
ADVTLSALNDSDANSDVVDIEGLGETPPAK	1xTMT6plex [K30]; 1xTMT6plex [N-Term]	8.40842e-07	0	2	Q8IXM2	BAP18	Chromatin complexes subunit BAP18 OS=Homo sapiens OX=9606 GN=BAP18 PE=1 SV=1	0	3471.77	111.2	95.2	110	92.1	80.7	110.7	4	2.12	0.00184	45.3546	38
ADVTTAFPTLGTDQVSELVPGKEELNIVK	2xTMT6plex [K22; K29]; 1xTMT6plex [N-Term]	0.00011507	2.77511e-05	1	P41214	EIF2D	Eukaryotic translation initiation factor 2D OS=Homo sapiens OX=9606 GN=EIF2D PE=1 SV=3	1	3759.1							4	4.33	0.00407	47.2676	2
ADVVDSETVVR	1xTMT6plex [N-Term]	0.000234596	2.77511e-05	1	Q9H6T0	ESRP2	Epithelial splicing regulatory protein 2 OS=Homo sapiens OX=9606 GN=ESRP2 PE=1 SV=1	0	1418.77							2	-0.94	-0.00067	18.8982	26
ADVVESWIGEK	1xTMT6plex [K11]; 1xTMT6plex [N-Term]	4.90986e-06	0	2	Q13813	SPTAN1	Spectrin alpha chain, non-erythrocytic 1 OS=Homo sapiens OX=9606 GN=SPTAN1 PE=1 SV=3	0	1690.94	94.7	115	99.4	95.9	100.2	94.7	2	1.14	0.00096	40.0878	62
ADVVVSGPK	1xTMT6plex [K9]; 1xTMT6plex [N-Term]	0.000188684	2.77511e-05	2	Q09666	AHNAK	Neuroblast differentiation-associated protein AHNAK OS=Homo sapiens OX=9606 GN=AHNAK PE=1 SV=2	0	1329.81	106.1	106.4	96.2	98.1	97.1	96.1	2	2.6	0.00173	17.6007	61
ADVVVSGPKVDIEAPDVSLEGPEGK	2xTMT6plex [K9; K25]; 1xTMT6plex [N-Term]	0.0469318	0.00263932	1	Q09666	AHNAK	Neuroblast differentiation-associated protein AHNAK OS=Homo sapiens OX=9606 GN=AHNAK PE=1 SV=2	1	3194.78							3	-5.88	-0.00626	36.2133	5
ADWLDSIRPQK	1xTMT6plex [K11]; 1xTMT6plex [N-Term]	0.00290073	0.000232546	1	Q9H300	PARL	Presenilins-associated rhomboid-like protein, mitochondrial OS=Homo sapiens OX=9606 GN=PARL PE=1 SV=2	0	1787.02	98	106.7	104.7	97.2	100.1	93.2	3	6.07	0.00362	30.7854	8
ADWLSHYWMPK	1xTMT6plex [K11]; 1xTMT6plex [N-Term]	0.00744277	0.00053284	1	P08243	ASNS	Asparagine synthetase [glutamine-hydrolyzing] OS=Homo sapiens OX=9606 GN=ASNS PE=1 SV=4	0	1891.99	98.6	99.9	117.9	102.8	84.5	96.3	3	1.04	0.00066	40.2911	10
ADWWTNTAHYNR	1xTMT6plex [N-Term]	3.88246e-05	0	1	Q6P2Q9	PRPF8	Pre-mRNA-processing-splicing factor 8 OS=Homo sapiens OX=9606 GN=PRPF8 PE=1 SV=2	0	1763.85	98.8	102.4	97.6	104.9	99.3	97.1	3	2.66	0.00156	23.4567	24
ADYEIASK	1xTMT6plex [K8]; 1xTMT6plex [N-Term]	0.00142302	0.000142151	1	Q9NQ29; Q9Y383	LUC7L; LUC7L2	Putative RNA-binding protein Luc7-like 1 OS=Homo sapiens OX=9606 GN=LUC7L PE=1 SV=1;Putative RNA-binding protein Luc7-like 2 OS=Homo sapiens OX=9606 GN=LUC7L2 PE=1 SV=2	0	1354.76	101.8	100.7	102.5	97.7	100.7	96.6	2	2.64	0.00179	18.8778	31
ADYNLTR	1xTMT6plex [N-Term]	0.0176398	0.00152072	1	P26640	VARS	Valine--tRNA ligase OS=Homo sapiens OX=9606 GN=VARS PE=1 SV=4	0	1081.58	104.7	98.3	98.1	99.7	100.7	98.5	2	3.58	0.00194	13.0303	15
AEAAALTETAK	1xTMT6plex [K11]; 1xTMT6plex [N-Term]	1.03054e-05	0	2	O15439	ABCC4	Multidrug resistance-associated protein 4 OS=Homo sapiens OX=9606 GN=ABCC4 PE=1 SV=3	0	1533.89	103.8	100.3	95.2	100.8	100	100	2	2.31	0.00177	19.2709	45
AEAAASALADADADLEER	1xTMT6plex [N-Term]	4.08293e-08	0	2	O43633	CHMP2A	Charged multivesicular body protein 2a OS=Homo sapiens OX=9606 GN=CHMP2A PE=1 SV=1	0	2017.99	105.3	109	96.5	99.8	95.3	94	2	1.47	0.00148	34.719	50
AEAALLLLPEAAAER	1xAcetyl [N-Term]; 1xTMT6plex [N-Term]	4.15316e-05	0	1	Q96JB2	COG3	Conserved oligomeric Golgi complex subunit 3 OS=Homo sapiens OX=9606 GN=COG3 PE=1 SV=3	0	1809.03							2	-126673	-114.578	53.3296	77
AEAAVESAVAGPQGR	1xTMT6plex [N-Term]	1.01614e-06	0	1	Q9UHJ6	SHPK	Sedoheptulokinase OS=Homo sapiens OX=9606 GN=SHPK PE=1 SV=3	0	1641.88							2	1.94	0.0016	20.6019	51
AEACFVNCVER	2xCarbamidomethyl [C4; C8]; 1xTMT6plex [N-Term]	2.64002e-05	0	1	O60220	TIMM8A	Mitochondrial import inner membrane translocase subunit Tim8 A OS=Homo sapiens OX=9606 GN=TIMM8A PE=1 SV=1	0	1583.75	100.5	76	90.9	125.3	99.8	107.5	2	7.64	0.00605	21.6275	15
AEADKNDK	2xTMT6plex [K5; K8]; 1xTMT6plex [N-Term]	0.005066	0.000395322	3	P07900; P08238	HSP90AA1; HSP90AB1	Heat shock protein HSP 90-alpha OS=Homo sapiens OX=9606 GN=HSP90AA1 PE=1 SV=5;Heat shock protein HSP 90-beta OS=Homo sapiens OX=9606 GN=HSP90AB1 PE=1 SV=4	1	1577.91	99.6	107.4	112.8	93.4	95.5	91.2	2	3.41	0.00269	8.6961	18
AEAEAAAVHGAR	1xTMT6plex [N-Term]	1.12705e-06	0	1	Q5T8P6	RBM26	RNA-binding protein 26 OS=Homo sapiens OX=9606 GN=RBM26 PE=1 SV=3	0	1381.74	110.6	114.2	102.9	86	92.7	93.5	3	-0.19	-9e-05	9.1096	49
AEAEAQAEELSFPR	1xTMT6plex [N-Term]	1.15146e-06	0	1	P11498	PC	Pyruvate carboxylase, mitochondrial OS=Homo sapiens OX=9606 GN=PC PE=1 SV=2	0	1776.9	93.1	98.9	96.1	108	104.1	99.7	2	3.9	0.00347	26.9805	54
AEAEAWYQTK	1xTMT6plex [K10]; 1xTMT6plex [N-Term]	3.84505e-05	0	2	P08729	KRT7	Keratin, type II cytoskeletal 7 OS=Homo sapiens OX=9606 GN=KRT7 PE=1 SV=5	0	1654.88	102	100.6	100.4	103.2	97	96.8	3	3.34	0.00184	24.8123	35
AEAEGESLESWLNK	1xAcetyl [N-Term]; 1xTMT6plex [K14]; 1xTMT6plex [N-Term]	7.39663e-05	2.77511e-05	1	Q9NZ52	GGA3	ADP-ribosylation factor-binding protein GGA3 OS=Homo sapiens OX=9606 GN=GGA3 PE=1 SV=1	0	2063.07	93.5	104.5	97	101.1	92.9	111	2	-111075	-114.578	48.9363	79
AEAEGVPTTPGPASGSTFR	1xAcetyl [N-Term]; 1xTMT6plex [N-Term]	3.55692e-05	0	1	Q86VR2	RETREG3	Reticulophagy regulator 3 OS=Homo sapiens OX=9606 GN=RETREG3 PE=1 SV=1	0	2103.06							2	-108967	-114.581	25.353	59
AEAELLQQQK	1xTMT6plex [K10]; 1xTMT6plex [N-Term]	2.7392e-05	0	1	Q15149	PLEC	Plectin OS=Homo sapiens OX=9606 GN=PLEC PE=1 SV=3	0	1615.94	93.9	104.4	100.3	97.9	101.5	102	2	4.15	0.00336	21.658	61
AEAENTSEVSTVLK	1xTMT6plex [K14]; 1xTMT6plex [N-Term]	2.40489e-08	0	2	Q16512	PKN1	Serine/threonine-protein kinase N1 OS=Homo sapiens OX=9606 GN=PKN1 PE=1 SV=2	0	1936.06	98.3	93.2	88.3	105.2	107.1	107.9	2	1.76	0.0017	23.1521	81
AEAEQEKDQLR	1xTMT6plex [K7]; 1xTMT6plex [N-Term]	0.00966938	0.000746397	1	Q96CV9	OPTN	Optineurin OS=Homo sapiens OX=9606 GN=OPTN PE=1 SV=3	1	1774.97	87.2	84.7	80.8	126.4	109.9	110.9	2	3.27	0.0029	12.286	39
AEAESLYQSK	1xTMT6plex [K10]; 1xTMT6plex [N-Term]	2.03365e-05	0	2	P04264	KRT1	Keratin, type II cytoskeletal 1 OS=Homo sapiens OX=9606 GN=KRT1 PE=1 SV=6	0	1583.87	222.6	92.3	73.4	72.6	61.4	77.6	2	3.84	0.00304	20.4229	58
AEAESMYQIK	1xTMT6plex [K10]; 1xTMT6plex [N-Term]	1.7307e-05	0	2	P05787	KRT8	Keratin, type II cytoskeletal 8 OS=Homo sapiens OX=9606 GN=KRT8 PE=1 SV=7	0	1627.88	84.5	101	91.1	111.6	113.6	98.2	2	2.67	0.00217	23.5968	64
AEAESMYQIK	1xOxidation [M6]; 1xTMT6plex [K10]; 1xTMT6plex [N-Term]	0.000440147	3.92285e-05	3	P05787	KRT8	Keratin, type II cytoskeletal 8 OS=Homo sapiens OX=9606 GN=KRT8 PE=1 SV=7	0	1643.87	89.3	99.9	96.6	109.5	102.8	101.9	2	3.36	0.00276	17.9543	33
AEAESWYR	1xTMT6plex [N-Term]	0.26281	0.00805656	1	Q14533	KRT81	Keratin, type II cuticular Hb1 OS=Homo sapiens OX=9606 GN=KRT81 PE=1 SV=3	0	1240.62							2	3.09	0.00192	18.7444	2
AEAETLPSLSITK	1xTMT6plex [K13]; 1xTMT6plex [N-Term]	2.14775e-05	0	2	O95340	PAPSS2	Bifunctional 3'-phosphoadenosine 5'-phosphosulfate synthase 2 OS=Homo sapiens OX=9606 GN=PAPSS2 PE=1 SV=2	0	1818.06							2	3.75	0.00341	31.6148	48
AEAEYIAAK	1xTMT6plex [K9]; 1xTMT6plex [N-Term]	0.000237481	2.77511e-05	1	Q5T7V8	GORAB	RAB6-interacting golgin OS=Homo sapiens OX=9606 GN=GORAB PE=1 SV=1	0	1423.82	100.1	101.3	97.9	104.6	97.6	98.6	2	5.95	0.00424	20.0526	37
AEAFQLYQEAAQLDMLLEK	1xTMT6plex [K19]; 1xTMT6plex [N-Term]	1.16427e-07	0	1	O75955	FLOT1	Flotillin-1 OS=Homo sapiens OX=9606 GN=FLOT1 PE=1 SV=3	0	2669.43	95.3	92.2	109.6	110.1	90.1	102.8	3	4.14	0.00368	53.8305	67
AEAGAGLSETVTETTVTVTTEPENR	1xAcetyl [N-Term]; 1xTMT6plex [N-Term]	9.6774e-05	2.77511e-05	1	O60927	PPP1R11	E3 ubiquitin-protein ligase PPP1R11 OS=Homo sapiens OX=9606 GN=PPP1R11 PE=1 SV=1	0	2834.41							3	-80847.4	-76.3849	40.1739	74
AEAGAGSATEFQFR	1xTMT6plex [N-Term]	2.81474e-08	0	2	P46783	RPS10	40S ribosomal protein S10 OS=Homo sapiens OX=9606 GN=RPS10 PE=1 SV=1	0	1670.83	102.9	96.1	101.7	102.7	98.4	98.2	2	3.86	0.00322	22.6844	89
AEAGDAALSVAEWLR	1xAcetyl [N-Term]; 1xTMT6plex [N-Term]	4.1267e-05	0	1	Q96P48	ARAP1	Arf-GAP with Rho-GAP domain, ANK repeat and PH domain-containing protein 1 OS=Homo sapiens OX=9606 GN=ARAP1 PE=1 SV=3	0	1829.96							2	-125227	-114.58	53.1412	86
AEAGDNLGALVR	1xTMT6plex [N-Term]	5.35968e-07	0	3	P49411	TUFM	Elongation factor Tu, mitochondrial OS=Homo sapiens OX=9606 GN=TUFM PE=1 SV=2	0	1414.79	103.7	94.9	97.8	100.8	102.6	100.1	2	2.1	0.00149	22.867	73
AEAGGGWEGSASYK	1xTMT6plex [K14]; 1xTMT6plex [N-Term]	4.30794e-08	0	1	Q969T9	WBP2	WW domain-binding protein 2 OS=Homo sapiens OX=9606 GN=WBP2 PE=1 SV=1	0	1827.93	88.5	88.7	97.7	118.6	107.5	98.9	2	2.96	0.0027	20.9472	82
AEAGLGALPR	1xTMT6plex [N-Term]	5.16084e-05	1.80381e-05	1	Q9NR77	PXMP2	Peroxisomal membrane protein 2 OS=Homo sapiens OX=9606 GN=PXMP2 PE=1 SV=3	0	1183.7	96.1	104.6	103.8	97.5	98	100	2	2.68	0.00158	19.7033	34
AEAGPEGVAPAPEGEK	1xTMT6plex [K16]; 1xTMT6plex [N-Term]	1.04893e-08	0	2	Q9Y4L1	HYOU1	Hypoxia up-regulated protein 1 OS=Homo sapiens OX=9606 GN=HYOU1 PE=1 SV=1	0	1967.05	98.1	100.4	97.3	99.3	106	98.9	2	0.89	0.00087	16.7765	93
AEAGPEGVAPAPEGEKK	2xTMT6plex [K16; K17]; 1xTMT6plex [N-Term]	4.95273e-08	0	3	Q9Y4L1	HYOU1	Hypoxia up-regulated protein 1 OS=Homo sapiens OX=9606 GN=HYOU1 PE=1 SV=1	1	2324.31	93.9	88.4	88.5	112.3	115	101.8	2	3.34	0.00388	14.7393	60
AEAGVPAEFSIWTR	1xTMT6plex [N-Term]	6.64171e-07	0	2	P21333	FLNA	Filamin-A OS=Homo sapiens OX=9606 GN=FLNA PE=1 SV=4	0	1762.93	104.9	93.6	98.7	96.7	105.7	100.4	3	6.08	0.00357	38.565	52
AEAHHAEL	1xTMT6plex [N-Term]	0.106509	0.00442065	1	Q99470	SDF2	Stromal cell-derived factor 2 OS=Homo sapiens OX=9606 GN=SDF2 PE=1 SV=2	0	1106.58							3	-0.49	-0.00018	7.7166	8
AEALASAIASTK	1xTMT6plex [K12]; 1xTMT6plex [N-Term]	2.94256e-06	0	2	Q9NVT9	ARMC1	Armadillo repeat-containing protein 1 OS=Homo sapiens OX=9606 GN=ARMC1 PE=1 SV=1	0	1590.95	102	103	103.3	98.3	99.2	94.2	2	3.46	0.00275	31.9929	64
AEALEDLVGFK	1xTMT6plex [K11]; 1xTMT6plex [N-Term]	0.00237368	0.000201691	1	P46013	MKI67	Proliferation marker protein Ki-67 OS=Homo sapiens OX=9606 GN=MKI67 PE=1 SV=2	0	1649.95	101.6	113.6	103	93.2	99.6	88.9	3	4.11	0.00226	43.5475	29
AEALLAR	1xTMT6plex [N-Term]	0.0477158	0.00265636	1	Q96BZ8	LENG1	Leukocyte receptor cluster member 1 OS=Homo sapiens OX=9606 GN=LENG1 PE=1 SV=1	0	972.604	100	103.8	103.3	95.9	100.6	96.5	2	0.17	8e-05	17.3411	25
AEALLSHAPR	1xTMT6plex [N-Term]	0.00040596	3.92285e-05	1	Q00536	CDK16	Cyclin-dependent kinase 16 OS=Homo sapiens OX=9606 GN=CDK16 PE=1 SV=1	0	1293.75							3	1.51	0.00065	16.7536	27
AEAISLQMVK	1xTMT6plex [K10]; 1xTMT6plex [N-Term]	0.00390847	0.000294148	1	Q8TC07	TBC1D15	TBC1 domain family member 15 OS=Homo sapiens OX=9606 GN=TBC1D15 PE=1 SV=2	0	1547.92	105.8	105.7	108.2	88.6	94.2	97.6	3	2.45	0.00126	30.4716	27
AEALTEPLNA	1xTMT6plex [N-Term]	0.00499229	0.000395322	1	Q9NX76	CMTM6	CKLF-like MARVEL transmembrane domain-containing protein 6 OS=Homo sapiens OX=9606 GN=CMTM6 PE=1 SV=1	0	1257.69	92.9	102.6	99.9	89	105.5	110.2	2	3.18	0.002	29.0885	61
AEAPLPSPK	1xTMT6plex [K9]; 1xTMT6plex [N-Term]	0.000436195	3.92285e-05	1	Q09666	AHNAK	Neuroblast differentiation-associated protein AHNAK OS=Homo sapiens OX=9606 GN=AHNAK PE=1 SV=2	0	1367.83	95.8	109.6	106	88.4	101.8	98.4	2	1.7	0.00116	17.6492	38
AEAPPLER	1xTMT6plex [N-Term]	0.293432	0.00870839	1	O75569	PRKRA	Interferon-inducible double-stranded RNA-dependent protein kinase activator A OS=Homo sapiens OX=9606 GN=PRKRA PE=1 SV=1	0	1111.63	94.4	116.3	95.4	96.9	97.1	99.9	2	2.76	0.00153	12.3563	16
AEASLER	1xTMT6plex [N-Term]	0.0159751	0.00139738	1	Q9UBE0	SAE1	SUMO-activating enzyme subunit 1 OS=Homo sapiens OX=9606 GN=SAE1 PE=1 SV=1	0	1004.56	105.9	98.2	100.4	96.9	98.2	100.4	2	2.22	0.00111	9.9786	21
AEASIQAGAGDGEWEESEVK	1xTMT6plex [K20]; 1xTMT6plex [N-Term]	7.01813e-11	0	4	Q09666	AHNAK	Neuroblast differentiation-associated protein AHNAK OS=Homo sapiens OX=9606 GN=AHNAK PE=1 SV=2	0	2521.25	102.5	101.5	98.1	98.8	101.2	98	2	3.41	0.0043	27.6005	98
AEASQLGHK	1xTMT6plex [K9]; 1xTMT6plex [N-Term]	0.000263289	2.77511e-05	1	Q9Y490	TLN1	Talin-1 OS=Homo sapiens OX=9606 GN=TLN1 PE=1 SV=3	0	1398.81	99.7	99.2	93.3	104.7	108.3	94.8	2	0.83	0.00058	10.1619	28
AEASSANLGSGCEEK	1xAcetyl [N-Term]; 1xCarbamidomethyl [C12]; 1xTMT6plex [K15]; 1xTMT6plex [N-Term]	0.000201563	2.77511e-05	1	Q6P1K2	PMF1	Polyamine-modulated factor 1 OS=Homo sapiens OX=9606 GN=PMF1 PE=1 SV=2	0	2009.99	105.2	90	127.7	101.6	86.3	89.3	2	-114009	-114.579	18.0109	45
AEAVLIDLFGLK	1xAcetyl [N-Term]; 1xTMT6plex [K12]; 1xTMT6plex [N-Term]	0.000471084	3.92285e-05	1	Q8IV20	LACC1	Laccase domain-containing protein 1 OS=Homo sapiens OX=9606 GN=LACC1 PE=1 SV=1	0	1789.09	89.1	78.3	82.9	127.4	110.1	112.2	2	-128085	-114.578	55.8433	59
AEAVVNTVDISER	1xTMT6plex [N-Term]	1.52242e-07	0	1	Q8IY81	FTSJ3	pre-rRNA 2'-O-ribose RNA methyltransferase FTSJ3 OS=Homo sapiens OX=9606 GN=FTSJ3 PE=1 SV=2	0	1631.88	104.7	103.8	102.9	90.7	97.2	100.7	2	2.24	0.00183	23.9234	64
AEAWEGAAVAQDLLALGYGGVPGAASR	1xTMT6plex [N-Term]	2.91129e-06	0	1	Q17RN3	FAM98C	Protein FAM98C OS=Homo sapiens OX=9606 GN=FAM98C PE=2 SV=1	0	2829.47							3	3.18	0.003	53.0234	25
AEAYLIEEMYDEAIQDYETAQEHNENDQQIR	1xTMT6plex [N-Term]	3.46607e-06	0	1	Q13217	DNAJC3	DnaJ homolog subfamily C member 3 OS=Homo sapiens OX=9606 GN=DNAJC3 PE=1 SV=1	0	3987.8	75.4	90.4	124.8	107.7	100.2	101.5	4	7.98	0.00795	53.174	35
AECLAMLGR	1xCarbamidomethyl [C3]; 1xTMT6plex [N-Term]	0.00020315	2.77511e-05	1	Q99615	DNAJC7	DnaJ homolog subfamily C member 7 OS=Homo sapiens OX=9606 GN=DNAJC7 PE=1 SV=2	0	1249.66	103.6	100.9	116.3	89	96.1	94.1	2	3.35	0.0021	24.6768	34
AECLEDLVSFIIEEPPQDMDEK	1xCarbamidomethyl [C3]; 1xTMT6plex [K22]; 1xTMT6plex [N-Term]	3.92551e-06	0	2	Q5H9R7	PPP6R3	Serine/threonine-protein phosphatase 6 regulatory subunit 3 OS=Homo sapiens OX=9606 GN=PPP6R3 PE=1 SV=2	0	3065.51	95.7	109.5	96.4	95.9	90.3	112.1	3	-0.22	-0.00023	54.4201	20
AECLEELGCLVESYGMNVCQPTPGK	3xCarbamidomethyl [C3; C9; C19]; 1xTMT6plex [K25]; 1xTMT6plex [N-Term]	6.80466e-09	0	2	Q14008	CKAP5	Cytoskeleton-associated protein 5 OS=Homo sapiens OX=9606 GN=CKAP5 PE=1 SV=3	0	3299.58	105.4	107.8	107.1	94.6	90.5	94.6	3	0.24	0.00027	52.5068	67
AECMLQQAER	1xCarbamidomethyl [C3]; 1xTMT6plex [N-Term]	4.94051e-05	1.80381e-05	1	P13796	LCP1	Plastin-2 OS=Homo sapiens OX=9606 GN=LCP1 PE=1 SV=6	0	1464.71	94.3	92.4	87.6	109.6	107.5	108.6	2	2.1	0.00154	19.0953	42
AECSAEQCYK	2xCarbamidomethyl [C3; C8]; 1xTMT6plex [K10]; 1xTMT6plex [N-Term]	7.89105e-05	2.77511e-05	1	P48163	ME1	NADP-dependent malic enzyme OS=Homo sapiens OX=9606 GN=ME1 PE=1 SV=1	0	1703.81	95.2	99	94.9	104.6	106.4	99.8	2	0.91	0.00078	13.4277	22
AECWSQK	1xCarbamidomethyl [C3]; 1xTMT6plex [K7]; 1xTMT6plex [N-Term]	0.020577	0.00167179	1	Q8IZH2	XRN1	5'-3' exoribonuclease 1 OS=Homo sapiens OX=9606 GN=XRN1 PE=1 SV=1	0	1366.72	97.9	97.9	100.7	98.2	100.3	105.1	2	0.7	0.00048	16.3151	15
AEDAYTSR	1xTMT6plex [N-Term]	0.146515	0.00525607	1	O75153	CLUH	Clustered mitochondria protein homolog OS=Homo sapiens OX=9606 GN=CLUH PE=1 SV=2	0	1141.57							2	0.72	0.00041	9.5399	5
AEDDQPLPGVLLSLSGGLFR	1xTMT6plex [N-Term]	8.28716e-06	0	1	Q5JPE7; Q15155; P69849	NOMO2; NOMO1; NOMO3	Nodal modulator 2 OS=Homo sapiens OX=9606 GN=NOMO2 PE=1 SV=1;Nodal modulator 1 OS=Homo sapiens OX=9606 GN=NOMO1 PE=1 SV=5;Nodal modulator 3 OS=Homo sapiens OX=9606 GN=NOMO3 PE=3 SV=2	0	2313.27	87.2	84.2	90.2	110.5	106.7	121.3	3	2.58	0.00199	53.5688	55
AEDELLDLQDK	1xTMT6plex [K11]; 1xTMT6plex [N-Term]	6.2698e-06	0	1	Q86V48	LUZP1	Leucine zipper protein 1 OS=Homo sapiens OX=9606 GN=LUZP1 PE=1 SV=2	0	1746.95	92.7	95.2	99.3	106.9	101.8	104	2	2.65	0.00232	33.4453	56
AEDGATPSPSNETPK	1xTMT6plex [K15]; 1xTMT6plex [N-Term]	7.91284e-07	0	4	P29966	MARCKS	Myristoylated alanine-rich C-kinase substrate OS=Homo sapiens OX=9606 GN=MARCKS PE=1 SV=4	0	1959.01	97.1	102.9	97.7	93.8	106.3	102.3	2	3.24	0.00318	12.8955	71
AEDGATPSPSNETPKK	2xTMT6plex [K15; K16]; 1xTMT6plex [N-Term]	2.6937e-05	0	1	P29966	MARCKS	Myristoylated alanine-rich C-kinase substrate OS=Homo sapiens OX=9606 GN=MARCKS PE=1 SV=4	1	2316.27	88.6	94.6	88.4	102	121.5	104.9	3	1.94	0.0015	12.4175	42
AEDGENYDIK	1xTMT6plex [K10]; 1xTMT6plex [N-Term]	1.95854e-05	0	4	O75347	TBCA	Tubulin-specific chaperone A OS=Homo sapiens OX=9606 GN=TBCA PE=1 SV=3	0	1611.83	102.2	109.8	106	94.2	95	92.9	2	3.22	0.0026	18.164	43
AEDGENYDIKK	2xTMT6plex [K10; K11]; 1xTMT6plex [N-Term]	1.42585e-05	0	3	O75347	TBCA	Tubulin-specific chaperone A OS=Homo sapiens OX=9606 GN=TBCA PE=1 SV=3	1	1969.08	98.3	108.2	100	99.2	101.9	92.4	2	1.3	0.00128	16.6784	51
AEDGHAVAK	1xTMT6plex [K9]; 1xTMT6plex [N-Term]	0.000167159	2.77511e-05	2	Q03252	LMNB2	Lamin-B2 OS=Homo sapiens OX=9606 GN=LMNB2 PE=1 SV=4	0	1355.77	106.9	110.4	105.9	89.1	95.5	92.2	2	2.54	0.00172	8.5001	42
AEDGSVIDYELIDQDAR	1xTMT6plex [N-Term]	1.71104e-09	0	10	P07355	ANXA2	Annexin A2 OS=Homo sapiens OX=9606 GN=ANXA2 PE=1 SV=2	0	2138.05	97.2	104	95.5	102.9	100.9	99.5	2	2.81	0.003	34.4795	90
AEDKEWMPVTK	2xTMT6plex [K4; K11]; 1xTMT6plex [N-Term]	4.95596e-05	1.80381e-05	3	P15880	RPS2	40S ribosomal protein S2 OS=Homo sapiens OX=9606 GN=RPS2 PE=1 SV=2	1	2021.13	101.6	103.2	102.1	99.4	101	92.7	2	3.38	0.00341	24.4559	45
AEDKEWMPVTK	1xOxidation [M7]; 2xTMT6plex [K4; K11]; 1xTMT6plex [N-Term]	0.216418	0.00703455	1	P15880	RPS2	40S ribosomal protein S2 OS=Homo sapiens OX=9606 GN=RPS2 PE=1 SV=2	1	2037.13	103.2	106.2	100.6	96.5	102.6	90.9	3	1.37	0.00093	19.7263	1
AEDLNIAPR	1xTMT6plex [N-Term]	0.000353867	3.92285e-05	2	Q96SZ5	ADO	2-aminoethanethiol dioxygenase OS=Homo sapiens OX=9606 GN=ADO PE=1 SV=2	0	1227.69	95.5	92.8	94.5	106.5	101.8	108.8	2	1.72	0.00105	18.3361	20
AEDLPLR	1xTMT6plex [N-Term]	0.021788	0.00173262	1	Q9BSJ8	ESYT1	Extended synaptotagmin-1 OS=Homo sapiens OX=9606 GN=ESYT1 PE=1 SV=1	0	1042.61	93.3	91.4	94.1	107.3	106	108	2	4.33	0.00226	17.7973	15
AEDIPQMDDAFSQTVK	1xTMT6plex [K16]; 1xTMT6plex [N-Term]	1.41228e-07	0	2	Q9NZM1	MYOF	Myoferlin OS=Homo sapiens OX=9606 GN=MYOF PE=1 SV=1	0	2253.15	91.3	99.4	93.4	105.7	102.1	108.1	2	1.6	0.0018	35.525	70
AEDLPQMDDAVMDNVK	1xTMT6plex [K16]; 1xTMT6plex [N-Term]	0.00244764	0.000201691	1	O75923	DYSF	Dysferlin OS=Homo sapiens OX=9606 GN=DYSF PE=1 SV=1	0	2249.12							3	2.21	0.00166	35.6999	16
AEDNADTLALVFEAPNQEK	1xTMT6plex [K19]; 1xTMT6plex [N-Term]	4.2181e-07	0	3	P12004	PCNA	Proliferating cell nuclear antigen OS=Homo sapiens OX=9606 GN=PCNA PE=1 SV=1	0	2533.32	104.5	100.8	110.9	94.6	93.3	95.9	3	4.08	0.00344	42.021	67
AEDNFEDIITKPPVR	1xTMT6plex [K11]; 1xTMT6plex [N-Term]	1.25507e-07	0	2	Q9Y6G9	DYNC1LI1	Cytoplasmic dynein 1 light intermediate chain 1 OS=Homo sapiens OX=9606 GN=DYNC1LI1 PE=1 SV=3	0	2202.22	94.9	100.1	91.1	104.5	106.2	103.2	3	0.29	0.00021	30.7608	33
AEDQHLVEMEDTLNK	1xTMT6plex [K15]; 1xTMT6plex [N-Term]	1.69323e-06	0	1	P30622	CLIP1	CAP-Gly domain-containing linker protein 1 OS=Homo sapiens OX=9606 GN=CLIP1 PE=1 SV=2	0	2230.14	94.4	92.5	93.4	114.7	98.6	106.4	3	2.13	0.00158	27.6115	43
AEDSNTHR	1xTMT6plex [N-Term]	0.00153789	0.000164178	2	P14868	DARS	Aspartate--tRNA ligase, cytoplasmic OS=Homo sapiens OX=9606 GN=DARS PE=1 SV=2	0	1158.57	103.7	102.5	89.1	92.1	102.6	109.9	3	5.76	0.00223	6.9245	41
AEDSVLLK	1xTMT6plex [K8]; 1xTMT6plex [N-Term]	0.00175578	0.000185426	1	Q86VS8	HOOK3	Protein Hook homolog 3 OS=Homo sapiens OX=9606 GN=HOOK3 PE=1 SV=2	0	1332.81							2	1.01	0.00067	23.1793	13
AEDTISILPDDPR	1xTMT6plex [N-Term]	0.00114765	0.000132543	2	Q8WUH1	CHURC1	Protein Churchill OS=Homo sapiens OX=9606 GN=CHURC1 PE=1 SV=2	0	1670.88							2	2.46	0.00206	29.5886	25
AEDYDVVK	1xTMT6plex [K8]; 1xTMT6plex [N-Term]	0.00136916	0.000142151	1	O75116	ROCK2	Rho-associated protein kinase 2 OS=Homo sapiens OX=9606 GN=ROCK2 PE=1 SV=4	0	1396.77	104.6	102.4	97.2	97.8	102.2	95.7	2	-0.2	-0.00014	19.7036	25
AEDYEENLQVMR	1xTMT6plex [N-Term]	7.45523e-06	0	1	Q02241	KIF23	Kinesin-like protein KIF23 OS=Homo sapiens OX=9606 GN=KIF23 PE=1 SV=3	0	1725.83	107.1	106.4	115	86.8	94.4	90.2	2	4.08	0.00352	25.5039	35
AEDYEVVK	1xTMT6plex [K8]; 1xTMT6plex [N-Term]	0.00162281	0.000174676	1	Q13464	ROCK1	Rho-associated protein kinase 1 OS=Homo sapiens OX=9606 GN=ROCK1 PE=1 SV=1	0	1410.79	97.5	96.7	100.8	104.6	102.2	98.2	2	3.34	0.00235	19.9365	18
AEDYPIDLYYLMDLSYSMK	1xTMT6plex [K19]; 1xTMT6plex [N-Term]	2.26424e-07	0	1	P05556	ITGB1	Integrin beta-1 OS=Homo sapiens OX=9606 GN=ITGB1 PE=1 SV=2	0	2788.39	88.4	94.1	92.6	123.4	100	101.6	3	0.62	0.00057	54.6706	54
AEDYPIDLYYLMDLSYSMKDDLENVK	2xTMT6plex [K19; K26]; 1xTMT6plex [N-Term]	2.01979e-05	0	1	P05556	ITGB1	Integrin beta-1 OS=Homo sapiens OX=9606 GN=ITGB1 PE=1 SV=2	1	3830.94	92.8	96.9	90.6	111.8	106	101.9	4	1.42	0.00136	54.7134	22
AEEAEAQK	1xTMT6plex [K8]; 1xTMT6plex [N-Term]	0.000854251	8.78677e-05	1	Q15149	PLEC	Plectin OS=Homo sapiens OX=9606 GN=PLEC PE=1 SV=3	0	1333.74	100.2	101.2	90	95.2	113	100.3	2	1.38	0.00092	9.9523	39
AEEAEAQKR	1xTMT6plex [K8]; 1xTMT6plex [N-Term]	0.000736145	7.57932e-05	2	Q15149	PLEC	Plectin OS=Homo sapiens OX=9606 GN=PLEC PE=1 SV=3	1	1489.84	93.3	97.7	92.3	102.9	112.3	101.5	2	1.13	0.00084	8.4563	16
AEEAPEK	1xTMT6plex [K7]; 1xTMT6plex [N-Term]	0.0181122	0.00156464	1	Q96QC0	PPP1R10	Serine/threonine-protein phosphatase 1 regulatory subunit 10 OS=Homo sapiens OX=9606 GN=PPP1R10 PE=1 SV=1	0	1231.69	99.2	90.5	106.6	94.4	102.1	107.2	2	1.36	0.00084	10.3334	11
AEEDAALQAK	1xTMT6plex [K10]; 1xTMT6plex [N-Term]	3.1086e-05	0	1	Q13428	TCOF1	Treacle protein OS=Homo sapiens OX=9606 GN=TCOF1 PE=1 SV=3	0	1503.84	112.2	93.8	107.4	86.6	93.6	106.4	2	9.63	0.00724	17.4889	35
AEEDKLEQIK	2xTMT6plex [K5; K10]; 1xTMT6plex [N-Term]	0.00552725	0.000404561	1	P13674	P4HA1	Prolyl 4-hydroxylase subunit alpha-1 OS=Homo sapiens OX=9606 GN=P4HA1 PE=1 SV=2	1	1890.12	100.2	110.1	100.2	106.8	93.4	89.3	2	-3.85	-0.00363	22.0237	5
AEEDTQFNYHR	1xTMT6plex [N-Term]	0.00126808	0.000142151	1	Q14683	SMC1A	Structural maintenance of chromosomes protein 1A OS=Homo sapiens OX=9606 GN=SMC1A PE=1 SV=2	0	1638.77							3	1.38	0.00075	12.4315	10
AEEDVEPECIMEK	1xCarbamidomethyl [C9]; 1xTMT6plex [K13]; 1xTMT6plex [N-Term]	4.4346e-07	0	1	Q9UJU6	DBNL	Drebrin-like protein OS=Homo sapiens OX=9606 GN=DBNL PE=1 SV=1	0	2036.99	93.5	102.9	94.7	105.8	101.8	101.4	2	1.88	0.00192	28.1216	49
AEEEAEAKPK	2xTMT6plex [K8; K10]; 1xTMT6plex [N-Term]	0.000327143	3.92285e-05	1	Q9BUQ8	DDX23	Probable ATP-dependent RNA helicase DDX23 OS=Homo sapiens OX=9606 GN=DDX23 PE=1 SV=3	0	1789.03	95.1	101.1	99.9	99.6	104.9	99.4	3	1.23	0.00073	11.1375	3
AEEEFNIEK	1xTMT6plex [K9]; 1xTMT6plex [N-Term]	0.000190144	2.77511e-05	2	P36543	ATP6V1E1	V-type proton ATPase subunit E 1 OS=Homo sapiens OX=9606 GN=ATP6V1E1 PE=1 SV=1	0	1566.84	95.3	102.9	98.6	102.6	100.3	100.3	2	2.13	0.00167	24.6972	39
AEEEIMK	1xTMT6plex [K7]; 1xTMT6plex [N-Term]	0.0110062	0.00089687	2	O00425	IGF2BP3	Insulin-like growth factor 2 mRNA-binding protein 3 OS=Homo sapiens OX=9606 GN=IGF2BP3 PE=1 SV=2	0	1307.73	96.8	98.5	88.5	101	111	104.3	2	1.65	0.00108	18.014	18
AEEENEFQIPGR	1xTMT6plex [N-Term]	1.07858e-05	0	2	Q8N0X7	SPART	Spartin OS=Homo sapiens OX=9606 GN=SPART PE=1 SV=1	0	1647.82	83.8	94.2	92.4	108	107.2	114.2	2	0.87	0.00072	23.4555	43
AEEFDQIK	1xTMT6plex [K8]; 1xTMT6plex [N-Term]	0.00153042	0.000164178	1	Q8N3C0	ASCC3	Activating signal cointegrator 1 complex subunit 3 OS=Homo sapiens OX=9606 GN=ASCC3 PE=1 SV=3	0	1437.8	94.2	92.8	94.1	109.6	103.3	106	2	4.27	0.00307	23.0867	24
AEEGFTQVTR	1xTMT6plex [N-Term]	0.000255733	2.77511e-05	1	Q9NRX1	PNO1	RNA-binding protein PNO1 OS=Homo sapiens OX=9606 GN=PNO1 PE=1 SV=1	0	1366.72							2	2.37	0.00162	16.1498	28
AEEGIAAGGVMDVNTALQEVLK	1xAcetyl [N-Term]; 1xTMT6plex [K22]; 1xTMT6plex [N-Term]	6.93276e-07	0	12	P25398	RPS12	40S ribosomal protein S12 OS=Homo sapiens OX=9606 GN=RPS12 PE=1 SV=3	0	2715.46	101.1	102.8	104	93.8	95.9	102.5	2	-84385.4	-114.573	54.3688	132
AEEGIAAGGVMDVNTALQEVLK	1xAcetyl [N-Term]; 1xOxidation [M11]; 1xTMT6plex [K22]; 1xTMT6plex [N-Term]	2.06868e-05	0	11	P25398	RPS12	40S ribosomal protein S12 OS=Homo sapiens OX=9606 GN=RPS12 PE=1 SV=3	0	2731.46	99.6	104.8	99.1	99.3	98.3	99	2	-83889.4	-114.57	54.3829	118
AEEKEGEKDAAAAK	3xTMT6plex [K4; K8; K14]; 1xTMT6plex [N-Term]	5.59816e-06	0	1	P80723	BASP1	Brain acid soluble protein 1 OS=Homo sapiens OX=9606 GN=BASP1 PE=1 SV=2	2	2363.36	87.1	94.5	83.5	110.9	119	105.1	3	2.76	0.00217	11.6349	11
AEEIANEMIEAAK	1xTMT6plex [K13]; 1xTMT6plex [N-Term]	4.97048e-08	0	2	P49588	AARS	Alanine--tRNA ligase, cytoplasmic OS=Homo sapiens OX=9606 GN=AARS PE=1 SV=2	0	1877.01	102.9	85.8	94.4	106.1	104.6	106.2	2	3.47	0.00326	40.472	102
AEELFLWVPR	1xTMT6plex [N-Term]	0.000305327	2.77511e-05	2	Q86TU7	SETD3	Actin-histidine N-methyltransferase OS=Homo sapiens OX=9606 GN=SETD3 PE=1 SV=1	0	1488.84	101.7	105.1	113.2	88.7	102.7	88.6	3	6.05	0.003	47.7802	39
AEELGLPILGVLR	1xTMT6plex [N-Term]	0.00531819	0.000395322	1	P09110	ACAA1	3-ketoacyl-CoA thiolase, peroxisomal OS=Homo sapiens OX=9606 GN=ACAA1 PE=1 SV=2	0	1608.99	98.7	97.6	96.2	106	102	99.6	2	0.28	0.00023	49.7383	9
AEELGQELK	1xTMT6plex [K9]; 1xTMT6plex [N-Term]	0.000138476	2.77511e-05	1	Q14980	NUMA1	Nuclear mitotic apparatus protein 1 OS=Homo sapiens OX=9606 GN=NUMA1 PE=1 SV=2	0	1474.85	96	108.1	101.2	94.6	104.3	95.9	2	1.82	0.00134	22.6766	47
AEELHYPLGER	1xTMT6plex [N-Term]	0.00655027	0.000496432	1	Q14257	RCN2	Reticulocalbin-2 OS=Homo sapiens OX=9606 GN=RCN2 PE=1 SV=1	0	1542.81	106.3	96.4	105.3	100.8	99.7	91.6	3	3.05	0.00157	18.3507	24
AEELLAEEK	1xTMT6plex [K9]; 1xTMT6plex [N-Term]	7.96461e-05	2.77511e-05	2	O00429	DNM1L	Dynamin-1-like protein OS=Homo sapiens OX=9606 GN=DNM1L PE=1 SV=2	0	1489.85	99.2	99.4	100.9	100.5	103.8	96.1	2	3.01	0.00224	25.8047	54
AEEILEK	1xTMT6plex [K7]; 1xTMT6plex [N-Term]	0.0102988	0.000821723	2	P62913	RPL11	60S ribosomal protein L11 OS=Homo sapiens OX=9606 GN=RPL11 PE=1 SV=2	0	1289.77	97.7	102.8	105.9	96	100.3	97.4	2	2.81	0.00181	22.8984	35
AEELIENEEPVVLTDTNLVYPALK	1xTMT6plex [K24]; 1xTMT6plex [N-Term]	5.87676e-05	1.80381e-05	1	Q9NWT6	HIF1AN	Hypoxia-inducible factor 1-alpha inhibitor OS=Homo sapiens OX=9606 GN=HIF1AN PE=1 SV=2	0	3157.73	104.7	80.9	90.2	105.5	119.6	99	3	4.08	0.00429	51.1316	56
AEELQEAK	1xTMT6plex [K8]; 1xTMT6plex [N-Term]	0.00547437	0.000395322	1	Q8WYA0	IFT81	Intraflagellar transport protein 81 homolog OS=Homo sapiens OX=9606 GN=IFT81 PE=1 SV=1	0	1375.78	100.8	96.8	93.1	101.8	102.4	105.1	2	0.04	3e-05	15.6699	37
AEELQPGFSK	1xTMT6plex [K10]; 1xTMT6plex [N-Term]	5.11289e-05	1.80381e-05	1	Q96TC7	RMDN3	Regulator of microtubule dynamics protein 3 OS=Homo sapiens OX=9606 GN=RMDN3 PE=1 SV=2	0	1563.88	93.5	91.6	95	106.1	110	103.9	2	2.38	0.00186	22.5005	42
AEEITIPADVTPER	1xTMT6plex [N-Term]	4.71247e-07	0	1	Q8IXI2	RHOT1	Mitochondrial Rho GTPase 1 OS=Homo sapiens OX=9606 GN=RHOT1 PE=1 SV=2	0	1769.95	98.3	98.1	100.2	96.9	96.7	109.8	2	7.26	0.00642	27.5816	45
AEELVGQEVLYK	1xTMT6plex [K12]; 1xTMT6plex [N-Term]	8.02675e-07	0	2	P53816	PLAAT3	Phospholipase A and acyltransferase 3 OS=Homo sapiens OX=9606 GN=PLAAT3 PE=1 SV=2	0	1836.05	103.8	96.8	112.5	92.7	94.8	99.2	2	1.95	0.00179	32.8163	78
AEEIWQQSVIGDYLAR	1xTMT6plex [N-Term]	1.68362e-05	0	1	P17480	UBTF	Nucleolar transcription factor 1 OS=Homo sapiens OX=9606 GN=UBTF PE=1 SV=1	0	2107.1	111.1	107.6	101.7	91.3	91.5	96.9	3	3.97	0.00279	46.1637	30
AEEIYPIK	1xTMT6plex [K8]; 1xTMT6plex [N-Term]	0.00168785	0.000174676	1	P49662	CASP4	Caspase-4 OS=Homo sapiens OX=9606 GN=CASP4 PE=1 SV=1	0	1420.85	80.2	70.7	83.3	134.9	116.1	114.8	2	3.49	0.00248	24.72	18
AEEMLSK	1xTMT6plex [K7]; 1xTMT6plex [N-Term]	0.0092271	0.00067718	1	P62993	GRB2	Growth factor receptor-bound protein 2 OS=Homo sapiens OX=9606 GN=GRB2 PE=1 SV=1	0	1265.72	101.5	105	109.7	88.4	98.7	96.7	2	2.15	0.00136	19.7493	30
AEEQPQVELFVK	1xAcetyl [N-Term]; 1xTMT6plex [K12]; 1xTMT6plex [N-Term]	0.00197848	0.000195329	7	O00299	CLIC1	Chloride intracellular channel protein 1 OS=Homo sapiens OX=9606 GN=CLIC1 PE=1 SV=4	0	1917.07	100.5	103.5	98.3	99.5	96.6	101.5	2	-119535	-114.578	40.8101	64
AEEVATFFAK	1xTMT6plex [K10]; 1xTMT6plex [N-Term]	1.66628e-05	0	2	P11387	TOP1	DNA topoisomerase 1 OS=Homo sapiens OX=9606 GN=TOP1 PE=1 SV=2	0	1570.89	105.2	102.3	109.2	87	98.8	97.6	2	2.02	0.00158	36.7345	62
AEEVELYLEK	1xTMT6plex [K10]; 1xTMT6plex [N-Term]	9.43344e-05	2.77511e-05	1	Q8NBN3	TMEM87A	Transmembrane protein 87A OS=Homo sapiens OX=9606 GN=TMEM87A PE=1 SV=3	0	1680.95							2	-0.76	-0.00064	36.0327	18
AEEVEYYYR	1xTMT6plex [N-Term]	0.000281592	2.77511e-05	1	Q9H0B6	KLC2	Kinesin light chain 2 OS=Homo sapiens OX=9606 GN=KLC2 PE=1 SV=1	0	1450.71	94.4	99.2	107	95.1	107.2	97.2	2	1.14	0.00083	22.1253	13
AEEVYAQLQK	1xTMT6plex [K10]; 1xTMT6plex [N-Term]	3.75898e-05	0	2	Q5T0F9	CC2D1B	Coiled-coil and C2 domain-containing protein 1B OS=Homo sapiens OX=9606 GN=CC2D1B PE=1 SV=1	0	1636.93	93.9	97.1	97.5	100.6	104.4	106.6	2	0.02	2e-05	26.5483	45
AEEWGVQYVETSAK	1xTMT6plex [K14]; 1xTMT6plex [N-Term]	1.57785e-07	0	2	P11234	RALB	Ras-related protein Ral-B OS=Homo sapiens OX=9606 GN=RALB PE=1 SV=1	0	2055.08	79.2	86.7	84.6	119.4	119.9	110.2	2	2.25	0.00231	32.8736	83
AEEYEFLTPVEEAPK	1xTMT6plex [K15]; 1xTMT6plex [N-Term]	7.61476e-06	0	6	P52565	ARHGDIA	Rho GDP-dissociation inhibitor 1 OS=Homo sapiens OX=9606 GN=ARHGDIA PE=1 SV=3	0	2210.16	95.5	101.1	99.2	102.7	103.1	98.4	2	0.48	0.00053	36.9991	73
AEEYILGDFCFLR	1xCarbamidomethyl [C10]; 1xTMT6plex [N-Term]	0.000221692	2.77511e-05	1	Q14517	FAT1	Protocadherin Fat 1 OS=Homo sapiens OX=9606 GN=FAT1 PE=1 SV=2	0	1861.94	84.6	103.3	101.4	97.1	100.9	112.7	3	4.52	0.00281	50.7132	15
AEFAAPSTDAPDK	1xTMT6plex [K13]; 1xTMT6plex [N-Term]	7.05776e-07	0	1	Q96B26	EXOSC8	Exosome complex component RRP43 OS=Homo sapiens OX=9606 GN=EXOSC8 PE=1 SV=1	0	1777.94	107.1	107	104.4	92.2	94.2	95	2	4.56	0.00405	21.0397	61
AEFAESLGLKPQDMFVESMFSLADK	1xOxidation [M]; 2xTMT6plex [K10; K25]; 1xTMT6plex [N-Term]	0.11612	0.00458911	2	Q9NRD9	DUOX1	Dual oxidase 1 OS=Homo sapiens OX=9606 GN=DUOX1 PE=1 SV=1	0	3493.82							4	3.64	0.00318	59.0658	6
AEFAEYASVDR	1xTMT6plex [N-Term]	7.62772e-05	2.77511e-05	1	Q9NWQ8	PAG1	Phosphoprotein associated with glycosphingolipid-enriched microdomains 1 OS=Homo sapiens OX=9606 GN=PAG1 PE=1 SV=2	0	1486.74	94.2	90	95.1	105.4	103.5	111.7	2	3.08	0.00229	24.5806	19
AEFEQIVLGK	1xTMT6plex [K10]; 1xTMT6plex [N-Term]	2.88957e-05	0	2	Q16831	UPP1	Uridine phosphorylase 1 OS=Homo sapiens OX=9606 GN=UPP1 PE=1 SV=1	0	1591.95	95.7	93.7	98	103	106.8	102.8	2	4.91	0.00391	38.1164	47
AEFEVHEVYAVDVLVSSGEGK	1xTMT6plex [K21]; 1xTMT6plex [N-Term]	2.64058e-07	0	31	Q9UQ80	PA2G4	Proliferation-associated protein 2G4 OS=Homo sapiens OX=9606 GN=PA2G4 PE=1 SV=3	0	2722.43	98.7	103.2	103.5	97.9	96.8	99.8	3	-1.18	-0.00107	44.4931	73
AEFFADVVPAVR	1xTMT6plex [N-Term]	8.49403e-06	0	2	Q9UHY7	ENOPH1	Enolase-phosphatase E1 OS=Homo sapiens OX=9606 GN=ENOPH1 PE=1 SV=1	0	1549.86	106.5	104.7	108.2	87.1	93.8	99.7	2	3.07	0.00238	39.7901	59
AEFFQHLIEDR	1xTMT6plex [N-Term]	6.09765e-05	1.80381e-05	1	O95487	SEC24B	Protein transport protein Sec24B OS=Homo sapiens OX=9606 GN=SEC24B PE=1 SV=2	0	1633.85	96.4	101.7	103.1	103.7	99.8	95.3	3	3.01	0.00164	36.899	45
AEFGDFDIK	1xTMT6plex [K9]; 1xTMT6plex [N-Term]	0.0288853	0.00201328	1	Q8IWS0	PHF6	PHD finger protein 6 OS=Homo sapiens OX=9606 GN=PHF6 PE=1 SV=1	0	1499.81							2	3.99	0.00299	34.3966	5
AEFGPPGPGAGSR	1xTMT6plex [N-Term]	5.44168e-06	0	2	Q9H4A4	RNPEP	Aminopeptidase B OS=Homo sapiens OX=9606 GN=RNPEP PE=1 SV=2	0	1428.74	102.6	96.4	85.3	111.3	102.3	102	2	2.34	0.00167	16.1639	48
AEFIVGGK	1xTMT6plex [K8]; 1xTMT6plex [N-Term]	0.00107431	0.000132543	1	P48729	CSNK1A1	Casein kinase I isoform alpha OS=Homo sapiens OX=9606 GN=CSNK1A1 PE=1 SV=2	0	1278.78							2	8.56	0.00547	24.8361	32
AEFSAGAWSEPR	1xTMT6plex [N-Term]	2.09711e-05	0	1	Q8N6S5	ARL6IP6	ADP-ribosylation factor-like protein 6-interacting protein 6 OS=Homo sapiens OX=9606 GN=ARL6IP6 PE=1 SV=1	0	1536.76	95.3	98.8	95	105.3	101.3	104.3	2	3.04	0.00233	25.8142	40
AEFTSPPSLFK	1xTMT6plex [K11]; 1xTMT6plex [N-Term]	9.64649e-05	2.77511e-05	3	Q6UN15	FIP1L1	Pre-mRNA 3'-end-processing factor FIP1 OS=Homo sapiens OX=9606 GN=FIP1L1 PE=1 SV=1	0	1681.96	96.1	94.2	103.9	102.3	104.4	99.1	2	1.49	0.00125	35.373	52
AEFTVETR	1xTMT6plex [N-Term]	0.00147206	0.000153798	1	P21333	FLNA	Filamin-A OS=Homo sapiens OX=9606 GN=FLNA PE=1 SV=4	0	1181.64	101.1	95.9	102.2	99.2	99.3	102.3	2	2.4	0.00142	17.2098	28
AEFVWHK	1xTMT6plex [K7]; 1xTMT6plex [N-Term]	0.0156404	0.00136151	1	O95219	SNX4	Sorting nexin-4 OS=Homo sapiens OX=9606 GN=SNX4 PE=1 SV=1	0	1374.79	91.8	88.9	88.5	108.7	111.9	110.2	3	4.69	0.00215	22.9362	21
AEFWLDLQPQAK	1xTMT6plex [K12]; 1xTMT6plex [N-Term]	5.71604e-05	1.80381e-05	2	Q05655	PRKCD	Protein kinase C delta type OS=Homo sapiens OX=9606 GN=PRKCD PE=1 SV=2	0	1904.07	99.7	99.8	97.6	101.7	100.2	100.9	2	2.41	0.0023	42.7438	46
AEGAATEEEGTPK	1xTMT6plex [K13]; 1xTMT6plex [N-Term]	6.34016e-07	0	2	P80723	BASP1	Brain acid soluble protein 1 OS=Homo sapiens OX=9606 GN=BASP1 PE=1 SV=2	0	1747.91	85.9	94.8	87.7	112	109.8	109.8	2	2.58	0.00226	12.039	55
AEGAGDAK	1xTMT6plex [K8]; 1xTMT6plex [N-Term]	0.00101069	0.000123391	1	P05204	HMGN2	Non-histone chromosomal protein HMG-17 OS=Homo sapiens OX=9606 GN=HMGN2 PE=1 SV=3	0	1176.66	101.1	110.3	98.7	93.5	101.1	95.3	2	1.18	0.0007	8.6376	29
AEGAQNQAK	1xTMT6plex [K9]; 1xTMT6plex [N-Term]	0.000145528	2.77511e-05	1	Q9P2E9	RRBP1	Ribosome-binding protein 1 OS=Homo sapiens OX=9606 GN=RRBP1 PE=1 SV=5	0	1374.77	84	84.4	94.8	120.7	107.8	108.3	2	2.27	0.00156	8.3822	35
AEGAQNQGK	1xTMT6plex [K9]; 1xTMT6plex [N-Term]	0.00014245	2.77511e-05	2	Q9P2E9	RRBP1	Ribosome-binding protein 1 OS=Homo sapiens OX=9606 GN=RRBP1 PE=1 SV=5	0	1360.76	83.7	87.8	97	113.1	110.5	107.9	2	-0.38	-0.00026	8.1776	38
AEGDSAGTAGTPGGTPAGDK	1xTMT6plex [K20]; 1xTMT6plex [N-Term]	1.09559e-07	0	1	Q92925	SMARCD2	SWI/SNF-related matrix-associated actin-dependent regulator of chromatin subfamily D member 2 OS=Homo sapiens OX=9606 GN=SMARCD2 PE=1 SV=3	0	2175.09	100.6	107	99.5	97.1	103.6	92.3	2	2.29	0.00249	13.0297	110
AEGDVAALNR	1xTMT6plex [N-Term]	4.28762e-05	1.80381e-05	2	P67936	TPM4	Tropomyosin alpha-4 chain OS=Homo sapiens OX=9606 GN=TPM4 PE=1 SV=3	0	1244.68	97.3	99.1	97.7	98.7	104.4	102.7	2	1.65	0.00103	14.2349	50
AEGEWLSFDVTDAVHEWLHHK	1xTMT6plex [K21]; 1xTMT6plex [N-Term]	4.6403e-05	1.80381e-05	1	P61812	TGFB2	Transforming growth factor beta-2 proprotein OS=Homo sapiens OX=9606 GN=TGFB2 PE=1 SV=1	0	2964.5	98.6	100.2	111.6	98.1	87.1	104.5	5	3.93	0.00233	49.2391	12
AEGFVDALHR	1xTMT6plex [N-Term]	5.82272e-05	1.80381e-05	1	Q96I24	FUBP3	Far upstream element-binding protein 3 OS=Homo sapiens OX=9606 GN=FUBP3 PE=1 SV=2	0	1343.73	103.3	100.8	101.5	88.9	99.2	106.2	3	1.74	0.00078	20.6224	52
AEGGGGGGRPGAPAAGDGK	1xTMT6plex [K19]; 1xTMT6plex [N-Term]	8.6525e-08	0	1	Q00839	HNRNPU	Heterogeneous nuclear ribonucleoprotein U OS=Homo sapiens OX=9606 GN=HNRNPU PE=1 SV=6	0	1997.06	106.4	110.4	104.5	90.8	96.6	91.2	3	0.99	0.00066	8.8012	27
AEGGYFGQIR	1xTMT6plex [N-Term]	0.00472953	0.000387804	1	Q8NI27	THOC2	THO complex subunit 2 OS=Homo sapiens OX=9606 GN=THOC2 PE=1 SV=2	0	1326.7	107.9	96.3	101.7	93.2	98.5	102.5	2	2.48	0.00165	21.1732	24
AEGLLDVFQAVK	1xTMT6plex [K12]; 1xTMT6plex [N-Term]	1.42585e-05	0	2	P23469	PTPRE	Receptor-type tyrosine-protein phosphatase epsilon OS=Homo sapiens OX=9606 GN=PTPRE PE=1 SV=1	0	1748.04	97.2	101	101.5	105.3	96.4	98.5	2	2.71	0.00237	47.7139	31
AEGILDVFQTVK	1xTMT6plex [K12]; 1xTMT6plex [N-Term]	3.84266e-06	0	2	P18433	PTPRA	Receptor-type tyrosine-protein phosphatase alpha OS=Homo sapiens OX=9606 GN=PTPRA PE=1 SV=3	0	1778.05	100.6	107.6	103.5	96.9	92.8	98.7	2	3.93	0.00349	45.563	58
AEGILLLVK	1xTMT6plex [K9]; 1xTMT6plex [N-Term]	0.00012268	2.77511e-05	2	Q9UKK3	PARP4	Protein mono-ADP-ribosyltransferase PARP4 OS=Homo sapiens OX=9606 GN=PARP4 PE=1 SV=3	0	1413.94	85.1	87.1	83.3	126.1	109.8	108.7	2	1.9	0.00134	41.4072	42
AEGIIYTTQSTIKP	1xTMT6plex [K13]; 1xTMT6plex [N-Term]	0.00103467	0.000132543	1	Q9UDR5	AASS	Alpha-aminoadipic semialdehyde synthase, mitochondrial OS=Homo sapiens OX=9606 GN=AASS PE=1 SV=1	0	1980.14							3	2.28	0.0015	30.8865	5
AEGLQVGQDAR	1xTMT6plex [N-Term]	6.04171e-05	1.80381e-05	2	Q8WWM7	ATXN2L	Ataxin-2-like protein OS=Homo sapiens OX=9606 GN=ATXN2L PE=1 SV=2	0	1372.74	98.8	93.4	100.5	97.4	102.5	107.4	2	2.31	0.00159	13.9618	49
AEGPDVAVDLPK	1xTMT6plex [K12]; 1xTMT6plex [N-Term]	1.40617e-05	0	2	Q09666	AHNAK	Neuroblast differentiation-associated protein AHNAK OS=Homo sapiens OX=9606 GN=AHNAK PE=1 SV=2	0	1668.96	98.7	100.9	97.4	102.7	101.7	98.6	2	3.77	0.00315	26.714	42
AEGPEVDVNLPK	1xTMT6plex [K12]; 1xTMT6plex [N-Term]	2.34607e-05	0	4	Q09666	AHNAK	Neuroblast differentiation-associated protein AHNAK OS=Homo sapiens OX=9606 GN=AHNAK PE=1 SV=2	0	1725.98	97	100.1	101.1	99.6	101.1	101.1	2	4.08	0.00352	24.8043	47
AEGPGLSK	1xTMT6plex [K8]; 1xTMT6plex [N-Term]	0.000996583	0.000123391	1	O75369	FLNB	Filamin-B OS=Homo sapiens OX=9606 GN=FLNB PE=1 SV=2	0	1216.73	93.6	91.5	103.3	104	106	101.6	2	2.3	0.0014	13.933	38
AEGSDVANAVLDGADCIMLSGETAK	1xCarbamidomethyl [C16]; 1xTMT6plex [K25]; 1xTMT6plex [N-Term]	1.34952e-11	0	21	P14618	PKM	Pyruvate kinase PKM OS=Homo sapiens OX=9606 GN=PKM PE=1 SV=4	0	2952.47	103.3	110.1	97.7	96.4	98.6	93.9	2	2.67	0.00394	50.4152	119
AEGSDVANAVLDGADCIMLSGETAK	1xCarbamidomethyl [C16]; 1xOxidation [M18]; 1xTMT6plex [K25]; 1xTMT6plex [N-Term]	1.61692e-08	0	14	P14618	PKM	Pyruvate kinase PKM OS=Homo sapiens OX=9606 GN=PKM PE=1 SV=4	0	2968.46	99	101.8	96.1	99.7	98.3	105.1	2	0.59	0.00087	50.4756	88
AEGSEAAELAEIYAK	1xTMT6plex [K15]; 1xTMT6plex [N-Term]	9.83534e-09	0	2	Q9NUQ8	ABCF3	ATP-binding cassette sub-family F member 3 OS=Homo sapiens OX=9606 GN=ABCF3 PE=1 SV=2	0	2010.08	105.3	92.1	94.4	110.7	93.9	103.6	2	4.59	0.00462	35.6429	99
AEGSPNQGK	1xTMT6plex [K9]; 1xTMT6plex [N-Term]	0.00288579	0.000232546	1	Q9P2E9	RRBP1	Ribosome-binding protein 1 OS=Homo sapiens OX=9606 GN=RRBP1 PE=1 SV=5	0	1345.75	77.8	80.6	86.3	127.4	114.9	113	2	-0.18	-0.00012	8.4892	31
AEGSSTASSGSQLAEGK	1xTMT6plex [K17]; 1xTMT6plex [N-Term]	8.88659e-11	0	2	Q9NZB2	FAM120A	Constitutive coactivator of PPAR-gamma-like protein 1 OS=Homo sapiens OX=9606 GN=FAM120A PE=1 SV=2	0	2025.05	90.6	80.9	82.8	145.7	98.7	101.2	2	-0.34	-0.00034	14.2798	117
AEGTFPGK	1xTMT6plex [K8]; 1xTMT6plex [N-Term]	0.188402	0.00631099	1	P14854	COX6B1	Cytochrome c oxidase subunit 6B1 OS=Homo sapiens OX=9606 GN=COX6B1 PE=1 SV=2	0	1264.73	102.8	104.7	105.6	94.4	94.1	98.4	3	1.79	0.00076	16.9134	6
AEGTFPGKI	1xTMT6plex [K8]; 1xTMT6plex [N-Term]	0.00396851	0.000304142	1	P14854	COX6B1	Cytochrome c oxidase subunit 6B1 OS=Homo sapiens OX=9606 GN=COX6B1 PE=1 SV=2	1	1377.81	96	94.1	95.7	104.2	101.6	108.5	2	2.77	0.00191	23.6796	15
AEGTGDAK	1xTMT6plex [K8]; 1xTMT6plex [N-Term]	0.00204922	0.000201691	1	O00479	HMGN4	High mobility group nucleosome-binding domain-containing protein 4 OS=Homo sapiens OX=9606 GN=HMGN4 PE=1 SV=3	0	1206.67	95.4	98.3	91.2	99.2	107.8	108.1	2	0.49	0.0003	8.6016	23
AEGTNFR	1xTMT6plex [N-Term]	0.225594	0.00723799	1	Q8WUM4	PDCD6IP	Programmed cell death 6-interacting protein OS=Homo sapiens OX=9606 GN=PDCD6IP PE=1 SV=1	0	1023.54							2	1.4	0.00072	9.7902	8
AEGTPNQGK	1xTMT6plex [K9]; 1xTMT6plex [N-Term]	0.00463683	0.000366955	2	Q9P2E9	RRBP1	Ribosome-binding protein 1 OS=Homo sapiens OX=9606 GN=RRBP1 PE=1 SV=5	0	1359.76	78.5	82.4	88.9	125.1	112.1	113	2	0.17	0.00011	8.7808	28
AEGTTYRDELLTK	1xTMT6plex [K13]; 1xTMT6plex [N-Term]	0.00141616	0.000142151	1	O14617	AP3D1	AP-3 complex subunit delta-1 OS=Homo sapiens OX=9606 GN=AP3D1 PE=1 SV=1	1	1955.08	92.5	94.2	94.3	113.2	108.9	97	3	3.29	0.00214	20.8455	10
AEGYAEGDLTLYHR	1xTMT6plex [N-Term]	1.83151e-06	0	1	Q8IY81	FTSJ3	pre-rRNA 2'-O-ribose RNA methyltransferase FTSJ3 OS=Homo sapiens OX=9606 GN=FTSJ3 PE=1 SV=2	0	1823.91	101.4	98.5	105	92.2	100.4	102.4	2	0.19	0.00017	22.0417	51
AEGYEVAHGGR	1xTMT6plex [N-Term]	1.3534e-05	0	2	P53041	PPP5C	Serine/threonine-protein phosphatase 5 OS=Homo sapiens OX=9606 GN=PPP5C PE=1 SV=1	0	1374.7	106.2	98.9	99	93.4	96.1	106.4	3	1.38	0.00063	8.7509	45
AEHAMQK	1xTMT6plex [K7]; 1xTMT6plex [N-Term]	0.0139139	0.00116958	1	P46939	UTRN	Utrophin OS=Homo sapiens OX=9606 GN=UTRN PE=1 SV=2	0	1272.71	93.4	94.7	92.2	101.2	109.9	108.5	2	1.7	0.00108	8.5088	17
AEHDQLLLNYAK	1xTMT6plex [K12]; 1xTMT6plex [N-Term]	7.41986e-07	0	3	P20700	LMNB1	Lamin-B1 OS=Homo sapiens OX=9606 GN=LMNB1 PE=1 SV=2	0	1873.06	100.3	108.2	101.6	96.7	102.8	90.4	2	1.91	0.00178	23.868	63
AEHDSILAEK	1xTMT6plex [K10]; 1xTMT6plex [N-Term]	1.93189e-05	0	2	P26639	TARS1	Threonine--tRNA ligase 1, cytoplasmic OS=Homo sapiens OX=9606 GN=TARS1 PE=1 SV=3	0	1570.88	84.7	90.1	105.9	96.7	110.5	112.1	2	1.24	0.00097	14.3784	49
AEHLDHVMFR	1xTMT6plex [N-Term]	5.94954e-05	1.80381e-05	2	O95394	PGM3	Phosphoacetylglucosamine mutase OS=Homo sapiens OX=9606 GN=PGM3 PE=1 SV=1	0	1483.77	99.8	101	95.7	96.6	103.1	103.8	4	4.35	0.00161	14.9103	54
AEHIPAGK	1xTMT6plex [K8]; 1xTMT6plex [N-Term]	0.0148714	0.00126079	1	Q96HC4	PDLIM5	PDZ and LIM domain protein 5 OS=Homo sapiens OX=9606 GN=PDLIM5 PE=1 SV=5	0	1280.77							2	1.95	0.00125	10.2324	17
AEHIPSGPLR	1xTMT6plex [N-Term]	0.0199164	0.00166647	1	Q9Y520	PRRC2C	Protein PRRC2C OS=Homo sapiens OX=9606 GN=PRRC2C PE=1 SV=4	0	1305.75							3	0.73	0.00032	12.7617	2
AEHNAALQAK	1xTMT6plex [K10]; 1xTMT6plex [N-Term]	0.000338723	3.92285e-05	1	Q8NBI6	XXYLT1	Xyloside xylosyltransferase 1 OS=Homo sapiens OX=9606 GN=XXYLT1 PE=1 SV=1	0	1510.87							3	2.76	0.00139	9.3403	11
AEHSVDIDVDIDWPIAEQR	1xTMT6plex [N-Term]	4.2469e-05	0	1	Q8NFW8	CMAS	N-acylneuraminate cytidylyltransferase OS=Homo sapiens OX=9606 GN=CMAS PE=1 SV=2	0	2437.22							3	4.19	0.0034	37.7451	15
AEKDEPGAWEETFK	2xTMT6plex [K3; K14]; 1xTMT6plex [N-Term]	2.65953e-07	0	4	Q14697	GANAB	Neutral alpha-glucosidase AB OS=Homo sapiens OX=9606 GN=GANAB PE=1 SV=3	1	2324.24	66.7	76.6	74.5	129	130.8	122.5	2	4.04	0.00469	27.4913	51
AEKDLLELSCNELR	1xCarbamidomethyl [C10]; 1xTMT6plex [K3]; 1xTMT6plex [N-Term]	1.48648e-05	0	1	Q5M775	SPECC1	Cytospin-B OS=Homo sapiens OX=9606 GN=SPECC1 PE=1 SV=1	1	2148.17	99.9	98	100.7	104.5	102.6	94.4	3	0.63	0.00045	32.4468	15
AEKDNAEIR	1xTMT6plex [K3]; 1xTMT6plex [N-Term]	0.00080783	7.57932e-05	2	Q99832	CCT7	T-complex protein 1 subunit eta OS=Homo sapiens OX=9606 GN=CCT7 PE=1 SV=2	1	1503.85	101.2	102.7	108.2	91.1	101.4	95.3	2	1.91	0.00144	9.3683	19
AEKENPGLTQDIIMK	2xTMT6plex [K3; K15]; 1xTMT6plex [N-Term]	9.22701e-07	0	1	Q9BUL8	PDCD10	Programmed cell death protein 10 OS=Homo sapiens OX=9606 GN=PDCD10 PE=1 SV=1	1	2374.36	96.6	94.1	97.8	101.8	104.7	105.1	3	3.4	0.00269	26.5495	31
AELAELPLR	1xTMT6plex [N-Term]	0.000343186	3.92285e-05	1	Q96QK1	VPS35	Vacuolar protein sorting-associated protein 35 OS=Homo sapiens OX=9606 GN=VPS35 PE=1 SV=2	0	1240.75	113.9	119.7	107.4	88.7	88.6	81.6	2	3.55	0.0022	28.5237	25
AEIAFEDR	1xTMT6plex [N-Term]	0.000393477	3.92285e-05	2	Q14315	FLNC	Filamin-C OS=Homo sapiens OX=9606 GN=FLNC PE=1 SV=3	0	1179.62	108.2	102.7	101.9	90.4	104.6	92.3	2	3.05	0.0018	19.5563	55
AEIAFEDRK	1xTMT6plex [K9]; 1xTMT6plex [N-Term]	0.00670323	0.000505076	2	Q14315	FLNC	Filamin-C OS=Homo sapiens OX=9606 GN=FLNC PE=1 SV=3	1	1536.88	106.5	98.8	103.4	95.6	96	99.8	2	1.25	0.00096	17.3856	26
AELATEEFLPVTPILEGFVILR	1xTMT6plex [N-Term]	1.26333e-08	0	3	Q13200	PSMD2	26S proteasome non-ATPase regulatory subunit 2 OS=Homo sapiens OX=9606 GN=PSMD2 PE=1 SV=3	0	2686.53	102.7	99.8	102.8	95.9	95.6	103.2	2	6.74	0.00905	55.2997	69
AELCPLAEELSCSICLEPFK	1xAcetyl [N-Term]; 3xCarbamidomethyl [C4; C12; C15]; 1xTMT6plex [K20]; 1xTMT6plex [N-Term]	0.000321524	3.92285e-05	1	Q14258	TRIM25	E3 ubiquitin/ISG15 ligase TRIM25 OS=Homo sapiens OX=9606 GN=TRIM25 PE=1 SV=2	0	2866.44	107.3	108.6	115.1	85.3	87.2	96.6	3	-79943	-76.3841	55.2009	54
AELDDTPMR	1xTMT6plex [N-Term]	0.000258939	2.77511e-05	1	P23246	SFPQ	Splicing factor, proline- and glutamine-rich OS=Homo sapiens OX=9606 GN=SFPQ PE=1 SV=2	0	1276.64	101.4	96.7	98	97.9	108.9	97.1	2	1.12	0.00071	17.0102	23
AELDDTPMR	1xOxidation [M8]; 1xTMT6plex [N-Term]	0.0896044	0.00393128	2	P23246	SFPQ	Splicing factor, proline- and glutamine-rich OS=Homo sapiens OX=9606 GN=SFPQ PE=1 SV=2	0	1292.64	94.8	90.9	98.2	109.7	104.4	102	2	0.6	0.00039	12.0502	23
AELDEAYDVYNMVWSTVK	1xTMT6plex [K18]; 1xTMT6plex [N-Term]	6.54743e-07	0	1	Q9NSV4	DIAPH3	Protein diaphanous homolog 3 OS=Homo sapiens OX=9606 GN=DIAPH3 PE=1 SV=4	0	2591.31	102.6	83.3	96.6	130.5	88.9	98.1	3	8.07	0.00697	54.0186	67
AELDEVNK	1xTMT6plex [K8]; 1xTMT6plex [N-Term]	0.000634811	6.47502e-05	2	Q03252	LMNB2	Lamin-B2 OS=Homo sapiens OX=9606 GN=LMNB2 PE=1 SV=4	0	1375.78							2	1.9	0.00131	18.2155	37
AELDGTILK	1xTMT6plex [K9]; 1xTMT6plex [N-Term]	0.00227884	0.000201691	1	Q8WXF1	PSPC1	Paraspeckle component 1 OS=Homo sapiens OX=9606 GN=PSPC1 PE=1 SV=1	0	1417.87	103.5	106	100.9	97.5	95.9	96.3	2	3.25	0.00231	27.3544	28
AELDHMR	1xTMT6plex [N-Term]	0.00605025	0.000424802	1	Q13136	PPFIA1	Liprin-alpha-1 OS=Homo sapiens OX=9606 GN=PPFIA1 PE=1 SV=1	0	1100.57	94.3	99.3	94.8	106.5	100.3	104.8	3	1.47	0.00054	10.0998	33
AEIDLVCELAK	1xCarbamidomethyl [C7]; 1xTMT6plex [K11]; 1xTMT6plex [N-Term]	0.000763997	7.57932e-05	1	Q6UB35	MTHFD1L	Monofunctional C1-tetrahydrofolate synthase, mitochondrial OS=Homo sapiens OX=9606 GN=MTHFD1L PE=1 SV=1	0	1718.98	97.7	97.5	111.8	98.9	97.8	96.2	3	2.6	0.00149	40.1433	35
AEIDMLDIR	1xTMT6plex [N-Term]	0.00176448	0.000185426	1	P09525	ANXA4	Annexin A4 OS=Homo sapiens OX=9606 GN=ANXA4 PE=1 SV=4	0	1304.71	94.6	106.9	105.6	96.4	94	102.5	2	3.2	0.00209	32.835	45
AELDNELMEGK	1xTMT6plex [K11]; 1xTMT6plex [N-Term]	5.36507e-06	0	2	Q13523	PRPF4B	Serine/threonine-protein kinase PRP4 homolog OS=Homo sapiens OX=9606 GN=PRPF4B PE=1 SV=3	0	1706.9	102.6	106.7	105.8	92.1	99.9	92.9	2	2.92	0.00249	30.0864	58
AELDQLLSGFGLEDPGSSLK	1xTMT6plex [K20]; 1xTMT6plex [N-Term]	2.21618e-07	0	1	Q68CZ2	TNS3	Tensin-3 OS=Homo sapiens OX=9606 GN=TNS3 PE=1 SV=2	0	2534.38	85.9	94.6	97.4	112.6	99	110.5	3	-0.51	-0.00043	53.5691	54
AELDQLPDESSSAK	1xAcetyl [N-Term]; 1xTMT6plex [K14]; 1xTMT6plex [N-Term]	0.00165498	0.000174676	1	Q5TKA1	LIN9	Protein lin-9 homolog OS=Homo sapiens OX=9606 GN=LIN9 PE=1 SV=1	0	1990.04	110.9	90.4	103.3	101.7	95	98.8	2	-115153	-114.579	30.1936	34
AELEGVAVTAPR	1xTMT6plex [N-Term]	3.43133e-05	0	1	Q9Y3X0	CCDC9	Coiled-coil domain-containing protein 9 OS=Homo sapiens OX=9606 GN=CCDC9 PE=1 SV=1	0	1441.82	97.5	95.9	98.7	109.6	97.4	100.9	2	-0.59	-0.00042	22.0189	30
AELELELGR	1xTMT6plex [N-Term]	0.000295057	2.77511e-05	1	Q15149	PLEC	Plectin OS=Homo sapiens OX=9606 GN=PLEC PE=1 SV=3	0	1258.72	96.1	97.3	94.4	98.5	109.5	104.2	2	6.94	0.00437	27.693	27
AEIELFVNR	1xTMT6plex [N-Term]	0.000218168	2.77511e-05	1	Q99805	TM9SF2	Transmembrane 9 superfamily member 2 OS=Homo sapiens OX=9606 GN=TM9SF2 PE=1 SV=1	0	1319.75	91.6	89.2	90.7	111.7	113.2	103.6	2	2.63	0.00174	32.1554	43
AELEIQK	1xTMT6plex [K7]; 1xTMT6plex [N-Term]	0.0628812	0.00314381	1	P07741	APRT	Adenine phosphoribosyltransferase OS=Homo sapiens OX=9606 GN=APRT PE=1 SV=2	0	1288.79	96	94.5	94.9	105.4	104.7	104.5	3	3.31	0.00142	20.6004	12
AELEIQKDALEPGQR	1xTMT6plex [K7]; 1xTMT6plex [N-Term]	0.00138909	0.000142151	1	P07741	APRT	Adenine phosphoribosyltransferase OS=Homo sapiens OX=9606 GN=APRT PE=1 SV=2	1	2155.21	90.7	94.3	97.1	105.2	107.6	105.1	3	1.28	0.00092	24.5672	1
AELEQHLEQEQEFQVNK	1xTMT6plex [K17]; 1xTMT6plex [N-Term]	4.2181e-07	0	1	Q16204	CCDC6	Coiled-coil domain-containing protein 6 OS=Homo sapiens OX=9606 GN=CCDC6 PE=1 SV=2	0	2557.33	103.1	106.9	102.5	97.1	92	98.5	3	3.87	0.0033	27.7816	40
AELFELLFR	1xTMT6plex [N-Term]	0.000878478	9.98689e-05	1	Q96QU8	XPO6	Exportin-6 OS=Homo sapiens OX=9606 GN=XPO6 PE=1 SV=1	0	1366.79							2	4.33	0.00296	52.8896	32
AELFTQSCADLDK	1xCarbamidomethyl [C8]; 1xTMT6plex [K13]; 1xTMT6plex [N-Term]	1.87332e-07	0	2	Q01082	SPTBN1	Spectrin beta chain, non-erythrocytic 1 OS=Homo sapiens OX=9606 GN=SPTBN1 PE=1 SV=2	0	1956.01	96	97.8	103.5	100.7	104.7	97.3	2	1.61	0.00157	31.2721	55
AELGALPDDFIDSLEK	1xTMT6plex [K16]; 1xTMT6plex [N-Term]	3.60439e-06	0	3	Q9BYT8	NLN	Neurolysin, mitochondrial OS=Homo sapiens OX=9606 GN=NLN PE=1 SV=1	0	2191.19	110.3	102.2	102.9	95.3	97.4	92	2	7.53	0.00826	51.0732	73
AELGEYIR	1xTMT6plex [N-Term]	0.00156819	0.000164178	1	Q14204	DYNC1H1	Cytoplasmic dynein 1 heavy chain 1 OS=Homo sapiens OX=9606 GN=DYNC1H1 PE=1 SV=5	0	1179.66	93.8	95.3	90.4	101.4	112.3	106.7	2	2.11	0.00124	23.2076	21
AELGFLESCLR	1xCarbamidomethyl [C9]; 1xTMT6plex [N-Term]	0.000706062	7.57932e-05	1	Q92696	RABGGTA	Geranylgeranyl transferase type-2 subunit alpha OS=Homo sapiens OX=9606 GN=RABGGTA PE=1 SV=2	0	1523.81	80.4	109.3	101.4	98.8	97.5	112.7	3	2.99	0.00152	39.5854	44
AEIGIAMGSGTAVAK	1xTMT6plex [K15]; 1xTMT6plex [N-Term]	1.96697e-06	0	1	P16615	ATP2A2	Sarcoplasmic/endoplasmic reticulum calcium ATPase 2 OS=Homo sapiens OX=9606 GN=ATP2A2 PE=1 SV=1	0	1834.05	99.6	92	104.9	105.3	99.8	98.5	2	4.79	0.00439	28.181	21
AELGIPLEEVPPEEINYLTR	1xTMT6plex [N-Term]	3.72197e-07	0	8	Q13907	IDI1	Isopentenyl-diphosphate Delta-isomerase 1 OS=Homo sapiens OX=9606 GN=IDI1 PE=1 SV=2	0	2511.35	103.5	99.8	108.7	96.5	92.4	99.2	2	4.34	0.00545	47.8633	65
AELGTDLLSQLSLEDQK	1xTMT6plex [K17]; 1xTMT6plex [N-Term]	1.4742e-07	0	2	Q9UQE7	SMC3	Structural maintenance of chromosomes protein 3 OS=Homo sapiens OX=9606 GN=SMC3 PE=1 SV=2	0	2318.29	103.7	113.2	102.9	90.3	97.6	92.3	3	1.49	0.00115	47.3123	77
AELGTDLLSQLSLEDQKR	1xTMT6plex [K17]; 1xTMT6plex [N-Term]	4.16999e-06	0	1	Q9UQE7	SMC3	Structural maintenance of chromosomes protein 3 OS=Homo sapiens OX=9606 GN=SMC3 PE=1 SV=2	1	2474.39	93.8	107.8	99.5	96.2	99.6	103	4	1.96	0.00122	41.118	33
AEIIADK	1xTMT6plex [K7]; 1xTMT6plex [N-Term]	0.00494365	0.000395322	2	Q13151	HNRNPA0	Heterogeneous nuclear ribonucleoprotein A0 OS=Homo sapiens OX=9606 GN=HNRNPA0 PE=1 SV=1	0	1217.75	113.1	102.2	105.2	96.8	95.1	87.6	2	1.28	0.00078	19.238	40
AEILALQQALK	1xTMT6plex [K11]; 1xTMT6plex [N-Term]	0.00012651	2.77511e-05	1	O14578	CIT	Citron Rho-interacting kinase OS=Homo sapiens OX=9606 GN=CIT PE=1 SV=2	0	1656.05	93.2	94.8	109.5	108	91.8	102.7	3	2.16	0.00119	39.9167	41
AELLDNEKPAAVVAPITTGYTVK	2xTMT6plex [K8; K23]; 1xTMT6plex [N-Term]	1.11469e-08	0	3	Q9HB71	CACYBP	Calcyclin-binding protein OS=Homo sapiens OX=9606 GN=CACYBP PE=1 SV=2	0	3087.79	95.1	99.1	102.7	95.2	97.8	110.1	3	2.06	0.00212	36.9208	69
AELLEFLESQQENMIK	1xTMT6plex [K16]; 1xTMT6plex [N-Term]	4.36709e-06	0	1	O75165	DNAJC13	DnaJ homolog subfamily C member 13 OS=Homo sapiens OX=9606 GN=DNAJC13 PE=1 SV=5	0	2380.28	92	99	95.3	111.3	97.8	104.6	3	0.67	0.00053	52.1969	47
AEILHEIAVLELAK	1xTMT6plex [K14]; 1xTMT6plex [N-Term]	0.00212277	0.000201691	1	O94768	STK17B	Serine/threonine-protein kinase 17B OS=Homo sapiens OX=9606 GN=STK17B PE=1 SV=1	0	2007.23							3	3.89	0.00261	47.8999	13
AEIIHHLADLLTDQR	1xTMT6plex [N-Term]	1.12486e-05	0	2	P54886	ALDH18A1	Delta-1-pyrroline-5-carboxylate synthase OS=Homo sapiens OX=9606 GN=ALDH18A1 PE=1 SV=2	0	1974.1	103.8	103.4	107	88.8	99.9	97.1	3	3.26	0.00215	41.8096	48
AEIIHHLADLLTDQRDEILLANK	1xTMT6plex [K23]; 1xTMT6plex [N-Term]	4.75553e-06	0	2	P54886	ALDH18A1	Delta-1-pyrroline-5-carboxylate synthase OS=Homo sapiens OX=9606 GN=ALDH18A1 PE=1 SV=2	1	3099.76	111	104	103.2	94.7	90.8	96.4	4	6.64	0.00515	49.4424	21
AELINIHHLMVELK	1xTMT6plex [K14]; 1xTMT6plex [N-Term]	0.00026661	2.77511e-05	1	Q8N1B4	VPS52	Vacuolar protein sorting-associated protein 52 homolog OS=Homo sapiens OX=9606 GN=VPS52 PE=1 SV=1	0	2118.25	98	97.8	92.1	104.9	97.7	109.5	4	4.24	0.00224	37.4398	31
AELLQGGDLLR	1xTMT6plex [N-Term]	7.72298e-06	0	1	Q12981	BNIP1	Vesicle transport protein SEC20 OS=Homo sapiens OX=9606 GN=BNIP1 PE=1 SV=3	0	1413.83	105.7	104.6	107.1	92.8	97.8	92	2	3.31	0.00234	32.7607	47
AELIQYQK	1xTMT6plex [K8]; 1xTMT6plex [N-Term]	0.000878478	9.98689e-05	1	Q567U6	CCDC93	Coiled-coil domain-containing protein 93 OS=Homo sapiens OX=9606 GN=CCDC93 PE=1 SV=2	0	1450.87	95.3	86.9	90.8	108.6	106.5	112	2	4.38	0.00318	23.1821	36
AEIISLCK	1xCarbamidomethyl [C7]; 1xTMT6plex [K8]; 1xTMT6plex [N-Term]	0.000781955	7.57932e-05	1	Q9BXP5	SRRT	Serrate RNA effector molecule homolog OS=Homo sapiens OX=9606 GN=SRRT PE=1 SV=1	0	1391.83	102.7	109.2	108.3	90.8	96	92.9	2	2.58	0.0018	27.6092	45
AEIITVSDGR	1xTMT6plex [N-Term]	3.27717e-05	0	1	Q9BRG1	VPS25	Vacuolar protein-sorting-associated protein 25 OS=Homo sapiens OX=9606 GN=VPS25 PE=1 SV=1	0	1289.73	95.5	100.4	93.8	105.9	100.9	103.4	2	2.27	0.00146	19.7168	37
AELIVQPELK	1xTMT6plex [K10]; 1xTMT6plex [N-Term]	0.000756934	7.57932e-05	1	P15924	DSP	Desmoplakin OS=Homo sapiens OX=9606 GN=DSP PE=1 SV=3	0	1597.99							2	2.02	0.00161	30.7327	16
AELMEISEDKTK	2xTMT6plex [K10; K12]; 1xTMT6plex [N-Term]	2.2525e-05	0	2	P05455	SSB	Lupus La protein OS=Homo sapiens OX=9606 GN=SSB PE=1 SV=2	1	2081.18	96.2	106.7	105	97.5	98.8	95.9	2	2.74	0.00285	26.4407	45
AELNEFLTR	1xTMT6plex [N-Term]	0.000325727	3.92285e-05	1	P23396	RPS3	40S ribosomal protein S3 OS=Homo sapiens OX=9606 GN=RPS3 PE=1 SV=2	0	1321.73	101.7	97.2	98.8	100.1	103.6	98.6	2	2.99	0.00197	30.1408	32
AELNNEKK	2xTMT6plex [K7; K8]; 1xTMT6plex [N-Term]	0.00487141	0.000395322	1	P63010	AP2B1	AP-2 complex subunit beta OS=Homo sapiens OX=9606 GN=AP2B1 PE=1 SV=1	1	1632.99	94.2	91.6	90.3	111.5	114.1	98.2	2	0.4	0.00032	11.1296	25
AELNPWPEYIYTR	1xTMT6plex [N-Term]	6.68935e-07	0	3	P26639	TARS1	Threonine--tRNA ligase 1, cytoplasmic OS=Homo sapiens OX=9606 GN=TARS1 PE=1 SV=3	0	1880.97	92.3	96.5	102.2	106.9	104.6	97.6	2	2.92	0.00275	39.4198	50
AEIPCEDEQEQEHNGPLDNK	1xCarbamidomethyl [C5]; 1xTMT6plex [K20]; 1xTMT6plex [N-Term]	6.73627e-08	0	1	Q96SB4	SRPK1	SRSF protein kinase 1 OS=Homo sapiens OX=9606 GN=SRPK1 PE=1 SV=2	0	2810.33	109.8	99	100.5	101.5	94.5	94.7	3	0.73	0.00068	19.9743	69
AELPPGPGAVGR	1xTMT6plex [N-Term]	0.00524147	0.000395322	1	Q9UI10	EIF2B4	Translation initiation factor eIF-2B subunit delta OS=Homo sapiens OX=9606 GN=EIF2B4 PE=1 SV=2	0	1349.77	98.9	103.7	101.9	95.8	99.5	100.2	2	4.33	0.00292	17.3133	29
AELPPPYTAIASPDASGIPVINCR	1xCarbamidomethyl [C23]; 1xTMT6plex [N-Term]	0.000169671	2.77511e-05	1	Q8N4L2	PIP4P2	Type 2 phosphatidylinositol 4,5-bisphosphate 4-phosphatase OS=Homo sapiens OX=9606 GN=PIP4P2 PE=1 SV=1	0	2738.44	108.2	103.8	95.8	94.7	106.3	91.2	3	5.19	0.00473	41.4501	6
AELPVTDK	1xTMT6plex [K8]; 1xTMT6plex [N-Term]	0.00201856	0.000201691	1	P35658	NUP214	Nuclear pore complex protein Nup214 OS=Homo sapiens OX=9606 GN=NUP214 PE=1 SV=2	0	1330.8							2	2.22	0.00148	19.2166	18
AELQAQIAFLQGER	1xTMT6plex [N-Term]	3.65079e-05	0	1	O43815	STRN	Striatin OS=Homo sapiens OX=9606 GN=STRN PE=1 SV=4	0	1803							3	2.69	0.00162	38.3768	21
AELQCPQPAAR	1xCarbamidomethyl [C5]; 1xTMT6plex [N-Term]	0.225594	0.00723799	1	P01024	C3	Complement C3 OS=Homo sapiens OX=9606 GN=C3 PE=1 SV=2	0	1469.77	87.1	91.5	94.1	115	102	110.2	2	3.92	0.00288	13.0064	18
AEIQELAMVPR	1xTMT6plex [N-Term]	6.61144e-06	0	1	P24928	POLR2A	DNA-directed RNA polymerase II subunit RPB1 OS=Homo sapiens OX=9606 GN=POLR2A PE=1 SV=2	0	1485.83	107.7	97.6	112.3	87.2	94.5	100.7	2	1.71	0.00127	30.9112	62
AELQLPPPPPPGHYGAWAAQELQAK	1xTMT6plex [K25]; 1xTMT6plex [N-Term]	1.4209e-05	0	1	Q13435	SF3B2	Splicing factor 3B subunit 2 OS=Homo sapiens OX=9606 GN=SF3B2 PE=1 SV=2	0	3124.7	97.5	99.5	103.6	104	89.3	106.1	4	4.37	0.00341	39.5667	19
AELQMLLEEEIPGGR	1xAcetyl [N-Term]; 1xTMT6plex [N-Term]	0.000235553	2.77511e-05	1	Q9NYB9	ABI2	Abl interactor 2 OS=Homo sapiens OX=9606 GN=ABI2 PE=1 SV=1	0	1956.03							2	-117153	-114.578	53.8209	44
AELQMLLEEEIPSGK	1xAcetyl [N-Term]; 1xTMT6plex [K15]; 1xTMT6plex [N-Term]	0.000152497	2.77511e-05	2	Q8IZP0	ABI1	Abl interactor 1 OS=Homo sapiens OX=9606 GN=ABI1 PE=1 SV=4	0	2187.2	99.3	101.4	95.1	95	103.1	106.2	2	-104770	-114.576	53.9214	83
AELQMLLEEEIPSGKR	1xAcetyl [N-Term]; 1xTMT6plex [K15]; 1xTMT6plex [N-Term]	0.000292554	2.77511e-05	1	Q8IZP0	ABI1	Abl interactor 1 OS=Homo sapiens OX=9606 GN=ABI1 PE=1 SV=4	1	2343.3	91.6	87.6	103	106.2	106.4	105.2	3	-97791.2	-76.3847	50.3075	30
AELQQEVEK	1xTMT6plex [K9]; 1xTMT6plex [N-Term]	0.000235553	2.77511e-05	1	O15525	MAFG	Transcription factor MafG OS=Homo sapiens OX=9606 GN=MAFG PE=1 SV=1	0	1531.87	104.3	103.9	105.4	93.3	94.6	98.5	2	0.41	0.00032	18.8724	12
AELQSIEEGVQGQQDALNSAK	1xTMT6plex [K21]; 1xTMT6plex [N-Term]	2.1847e-07	0	1	Q8WTW3	COG1	Conserved oligomeric Golgi complex subunit 1 OS=Homo sapiens OX=9606 GN=COG1 PE=1 SV=1	0	2673.41	86.9	126.5	103	105.5	91.9	86.2	3	3.43	0.00306	35.5093	56
AELQTALAHTQHAAR	1xTMT6plex [N-Term]	0.000117801	2.77511e-05	1	Q08379	GOLGA2	Golgin subfamily A member 2 OS=Homo sapiens OX=9606 GN=GOLGA2 PE=1 SV=3	0	1847.01	110.1	94.1	99.7	95.1	93.6	107.5	4	4	0.00185	14.2491	18
AEIQVGLQPGQGEQLLASEPSWWTTGK	1xTMT6plex [K27]; 1xTMT6plex [N-Term]	1.13108e-06	0	3	Q9H993	ARMT1	Damage-control phosphatase ARMT1 OS=Homo sapiens OX=9606 GN=ARMT1 PE=1 SV=1	0	3368.79	99.6	105.5	96.3	100.4	98.7	99.6	3	6.84	0.00768	49.3283	63
AELRDDPIISTHLAK	1xTMT6plex [K15]; 1xTMT6plex [N-Term]	0.000145528	2.77511e-05	1	O00231	PSMD11	26S proteasome non-ATPase regulatory subunit 11 OS=Homo sapiens OX=9606 GN=PSMD11 PE=1 SV=3	1	2137.24	95.3	96.3	101.8	100.9	102.2	103.5	4	3.22	0.00172	22.4104	19
AEISCIDNK	1xCarbamidomethyl [C5]; 1xTMT6plex [K9]; 1xTMT6plex [N-Term]	0.000193857	2.77511e-05	4	O75369	FLNB	Filamin-B OS=Homo sapiens OX=9606 GN=FLNB PE=1 SV=2	0	1507.82	98.2	94.2	96.4	99.8	103.8	107.6	3	1.26	0.00064	19.2903	37
AEISCTDNQDGTCSVSYLPVLPGDYSILVK	2xCarbamidomethyl [C5; C13]; 1xTMT6plex [K30]; 1xTMT6plex [N-Term]	2.73534e-08	0	4	P21333	FLNA	Filamin-A OS=Homo sapiens OX=9606 GN=FLNA PE=1 SV=4	0	3759.89	103	93.1	100.1	104.1	99.9	99.8	3	3.52	0.00441	51.1265	89
AELSEEALLSVLPTIR	1xAcetyl [N-Term]; 1xTMT6plex [N-Term]	1.64911e-05	0	1	P45974	USP5	Ubiquitin carboxyl-terminal hydrolase 5 OS=Homo sapiens OX=9606 GN=USP5 PE=1 SV=2	0	2012.15							2	-113884	-114.575	55.0413	99
AEISELPSIVQDLANGNITWADVEAR	1xTMT6plex [N-Term]	1.69928e-06	0	1	P41250	GARS1	Glycine--tRNA ligase OS=Homo sapiens OX=9606 GN=GARS1 PE=1 SV=3	0	3040.58	105.4	100.1	108.5	104	91.5	90.6	3	9.22	0.00935	53.9731	56
AEISFEDR	1xTMT6plex [N-Term]	0.00078926	7.57932e-05	1	P21333	FLNA	Filamin-A OS=Homo sapiens OX=9606 GN=FLNA PE=1 SV=4	0	1195.62	105.7	92.3	98.7	99.6	103.9	99.8	2	2.16	0.00129	19.3297	38
AEISFEDRK	1xTMT6plex [K9]; 1xTMT6plex [N-Term]	0.000391729	3.92285e-05	2	P21333	FLNA	Filamin-A OS=Homo sapiens OX=9606 GN=FLNA PE=1 SV=4	1	1552.87	95.4	92.6	98.5	101.7	105.3	106.6	2	1.53	0.00119	17.2472	35
AEISGVQGSETQVLR	1xTMT6plex [N-Term]	2.14483e-08	0	1	Q8N3D4	EHBP1L1	EH domain-binding protein 1-like protein 1 OS=Homo sapiens OX=9606 GN=EHBP1L1 PE=1 SV=2	0	1802.98	92.2	97.6	100.4	105.3	103.1	101.3	2	2.06	0.00185	21.8663	48
AEISNAIDQYVTGTIGEDEDLIK	1xTMT6plex [K23]; 1xTMT6plex [N-Term]	5.51018e-09	0	2	P31939	ATIC	Bifunctional purine biosynthesis protein PURH OS=Homo sapiens OX=9606 GN=ATIC PE=1 SV=3	0	2952.55	109.8	99	95.8	100	97.8	97.6	2	4.74	0.007	52.5419	108
AELSVLEQLNVSPQISK	1xTMT6plex [K17]; 1xTMT6plex [N-Term]	1.37736e-07	0	2	Q32P41	TRMT5	tRNA (guanine(37)-N1)-methyltransferase OS=Homo sapiens OX=9606 GN=TRMT5 PE=1 SV=2	0	2313.34	102.5	101.6	102.1	99.6	94.6	99.6	3	5.12	0.00395	44.0063	61
AELTALESLIEMGFPR	1xAcetyl [N-Term]; 1xTMT6plex [N-Term]	1.03779e-05	0	2	Q04323	UBXN1	UBX domain-containing protein 1 OS=Homo sapiens OX=9606 GN=UBXN1 PE=1 SV=2	0	2048.09							2	-111883	-114.573	55.858	83
AEITDAEGLGLK	1xTMT6plex [K12]; 1xTMT6plex [N-Term]	8.14231e-07	0	2	Q14203	DCTN1	Dynactin subunit 1 OS=Homo sapiens OX=9606 GN=DCTN1 PE=1 SV=3	0	1674.97	100.2	98.3	93.9	99.2	106	102.5	2	2.62	0.0022	30.1261	74
AEITFDDHK	1xTMT6plex [K9]; 1xTMT6plex [N-Term]	0.000104913	2.77511e-05	3	O75369	FLNB	Filamin-B OS=Homo sapiens OX=9606 GN=FLNB PE=1 SV=2	0	1533.83	100.7	95.1	102.5	94.9	103.8	103.1	3	2.35	0.0012	18.7407	30
AELTKVEEEIVTLR	1xTMT6plex [K5]; 1xTMT6plex [N-Term]	3.70842e-06	0	1	O43399	TPD52L2	Tumor protein D54 OS=Homo sapiens OX=9606 GN=TPD52L2 PE=1 SV=2	1	2088.23							3	2.09	0.00145	40.9018	10
AEITLVATKPEK	2xTMT6plex [K9; K12]; 1xTMT6plex [N-Term]	0.0541267	0.00282933	1	Q9UBF2	COPG2	Coatomer subunit gamma-2 OS=Homo sapiens OX=9606 GN=COPG2 PE=1 SV=1	0	1987.24							3	2.7	0.00179	23.4583	3
AELTSQESQISTYEEELAK	1xTMT6plex [K19]; 1xTMT6plex [N-Term]	2.27235e-07	0	1	P42566	EPS15	Epidermal growth factor receptor substrate 15 OS=Homo sapiens OX=9606 GN=EPS15 PE=1 SV=2	0	2614.35	102.7	110.6	93.7	90.4	98.7	103.7	3	0.29	0.00025	38.104	80
AELTTLLEQWEK	1xTMT6plex [K12]; 1xTMT6plex [N-Term]	0.00020395	2.77511e-05	1	Q9Y4B6	DCAF1	DDB1- and CUL4-associated factor 1 OS=Homo sapiens OX=9606 GN=DCAF1 PE=1 SV=3	0	1919.09	101.9	102.4	112.5	92.6	85.7	104.8	3	3.83	0.00245	50.9173	26
AELVAISSSEDEGNLR	1xTMT6plex [N-Term]	2.40489e-08	0	2	Q9UPN3	MACF1	Microtubule-actin cross-linking factor 1, isoforms 1/2/3/5 OS=Homo sapiens OX=9606 GN=MACF1 PE=1 SV=4	0	1918.99	95.8	89.5	95.7	98.6	98.5	121.9	2	3.73	0.00358	27.8004	66
AELVQGQSAPVGMK	1xAcetyl [N-Term]; 1xTMT6plex [K14]; 1xTMT6plex [N-Term]	0.000127382	2.77511e-05	1	Q96I24	FUBP3	Far upstream element-binding protein 3 OS=Homo sapiens OX=9606 GN=FUBP3 PE=1 SV=2	0	1915.07	95.8	91.9	105.4	101.3	101.7	103.9	2	-119660	-114.578	31.5584	67
AELVQLEDEITTLR	1xTMT6plex [N-Term]	7.72234e-05	2.77511e-05	1	Q16890	TPD52L1	Tumor protein D53 OS=Homo sapiens OX=9606 GN=TPD52L1 PE=1 SV=1	0	1859.03	97.1	115	113	81.1	89.7	104.1	3	8.24	0.00511	48.9641	41
AEIYEAFENIYPILK	1xTMT6plex [K15]; 1xTMT6plex [N-Term]	1.46092e-05	0	1	P20226	TBP	TATA-box-binding protein OS=Homo sapiens OX=9606 GN=TBP PE=1 SV=2	0	2271.27	99.6	110.1	111.5	98.5	87.1	93.2	3	9.5	0.0072	52.78	49
AELYKEPTNEELNR	1xTMT6plex [K5]; 1xTMT6plex [N-Term]	4.08202e-06	0	1	Q9H6R4	NOL6	Nucleolar protein 6 OS=Homo sapiens OX=9606 GN=NOL6 PE=1 SV=2	1	2164.17	88.9	100.1	133.3	78.4	101.4	97.9	3	0.87	0.00063	19.0756	16
AELYQHLK	1xTMT6plex [K8]; 1xTMT6plex [N-Term]	0.084506	0.0037133	1	Q9NVM9	INTS13	Integrator complex subunit 13 OS=Homo sapiens OX=9606 GN=INTS13 PE=1 SV=2	0	1459.87							3	3.42	0.00167	18.8516	1
AEMDQILHGLDK	1xTMT6plex [K12]; 1xTMT6plex [N-Term]	0.000182985	2.77511e-05	1	P04424	ASL	Argininosuccinate lyase OS=Homo sapiens OX=9606 GN=ASL PE=1 SV=4	0	1828	99.9	98.1	92.8	106.1	104.9	98.3	3	2.83	0.00173	35.2236	19
AEMEAVFLENLR	1xTMT6plex [N-Term]	1.13108e-06	0	4	Q5T013	HYI	Putative hydroxypyruvate isomerase OS=Homo sapiens OX=9606 GN=HYI PE=1 SV=2	0	1650.87	92	94.9	94	106.2	102.6	110.3	2	5.53	0.00457	43.678	53
AEMEVLLASK	1xTMT6plex [K10]; 1xTMT6plex [N-Term]	2.63117e-05	0	2	Q15149	PLEC	Plectin OS=Homo sapiens OX=9606 GN=PLEC PE=1 SV=3	0	1548.91	94.8	99.1	91.8	99.6	110.4	104.2	2	2.37	0.00184	35.6869	53
AEMLEIVQAIYK	1xOxidation [M3]; 1xTMT6plex [K12]; 1xTMT6plex [N-Term]	0.000595103	5.20452e-05	1				0	1882.08							3	2.19	0.00137	50.3907	34
AEMLLEEAK	1xTMT6plex [K9]; 1xTMT6plex [N-Term]	0.000212168	2.77511e-05	1	P07942	LAMB1	Laminin subunit beta-1 OS=Homo sapiens OX=9606 GN=LAMB1 PE=1 SV=2	0	1491.85	85.8	89.7	98	100	107.6	118.9	2	4.18	0.00311	30.9861	32
AEMIIEQNTDGVNFYNILTK	1xTMT6plex [K20]; 1xTMT6plex [N-Term]	1.01978e-06	0	1	Q9HB40	SCPEP1	Retinoid-inducible serine carboxypeptidase OS=Homo sapiens OX=9606 GN=SCPEP1 PE=1 SV=1	0	2771.47	88.9	90.8	89.3	120.6	107.8	102.5	3	6.73	0.00622	51.1973	49
AEMINNNVIVR	1xTMT6plex [N-Term]	1.46092e-05	0	1	Q8NCE0	TSEN2	tRNA-splicing endonuclease subunit Sen2 OS=Homo sapiens OX=9606 GN=TSEN2 PE=1 SV=2	0	1501.84	106.4	98.2	104.1	95.3	97.3	98.7	2	7.19	0.0054	22.3534	42
AEMSTPLSVK	1xTMT6plex [K10]; 1xTMT6plex [N-Term]	0.000490785	3.92285e-05	1	Q13546	RIPK1	Receptor-interacting serine/threonine-protein kinase 1 OS=Homo sapiens OX=9606 GN=RIPK1 PE=1 SV=3	0	1520.88	93.9	92	104.6	108.3	96.3	104.9	2	1.73	0.00131	23.6636	53
AEMTVFVR	1xTMT6plex [N-Term]	0.00539582	0.000395322	1	Q9Y5Z4	HEBP2	Heme-binding protein 2 OS=Homo sapiens OX=9606 GN=HEBP2 PE=1 SV=1	0	1181.65	100.8	94.9	94.1	107.8	103.6	98.9	2	3.17	0.00187	24.6235	15
AEMVVPDFSELFK	1xTMT6plex [K13]; 1xTMT6plex [N-Term]	0.00281228	0.000222687	1	Q9HD20	ATP13A1	Manganese-transporting ATPase 13A1 OS=Homo sapiens OX=9606 GN=ATP13A1 PE=1 SV=2	0	1970.07	94.8	110.8	104.9	104.8	92.1	92.6	3	7.89	0.00518	52.0431	32
AENFFILR	1xTMT6plex [N-Term]	0.000729347	7.57932e-05	2	P59998	ARPC4	Actin-related protein 2/3 complex subunit 4 OS=Homo sapiens OX=9606 GN=ARPC4 PE=1 SV=3	0	1238.71	95.8	95.3	95.9	103.1	108.6	101.3	2	1.61	0.001	35.2334	47
AENLGEVLR	1xTMT6plex [N-Term]	0.000213861	2.77511e-05	1	Q92544	TM9SF4	Transmembrane 9 superfamily member 4 OS=Homo sapiens OX=9606 GN=TM9SF4 PE=1 SV=2	0	1229.71	102.1	93.9	103.5	97.7	104.3	98.6	2	-1.18	-0.00073	22.7228	34
AENLLLDADMNIK	1xTMT6plex [K13]; 1xTMT6plex [N-Term]	7.97203e-06	0	1	Q7KZI7; P27448	MARK2; MARK3	Serine/threonine-protein kinase MARK2 OS=Homo sapiens OX=9606 GN=MARK2 PE=1 SV=2;MAP/microtubule affinity-regulating kinase 3 OS=Homo sapiens OX=9606 GN=MARK3 PE=1 SV=5	0	1918.07	91.2	100.7	145.1	86.5	88.2	88.1	2	0.56	0.00054	40.5697	13
AENIPAVVIEIK	1xTMT6plex [K12]; 1xTMT6plex [N-Term]	6.28769e-05	2.77511e-05	2	Q9Y6M5	SLC30A1	Zinc transporter 1 OS=Homo sapiens OX=9606 GN=SLC30A1 PE=1 SV=3	0	1754.08							3	0.52	0.00031	38.0168	26
AENLQLLTENELHR	1xTMT6plex [N-Term]	1.79912e-06	0	2	O94992	HEXIM1	Protein HEXIM1 OS=Homo sapiens OX=9606 GN=HEXIM1 PE=1 SV=1	0	1909.03	97.3	96.2	96.1	104.6	103.6	102.2	2	3.8	0.00363	27.444	54
AENLSVPVIGALLR	1xTMT6plex [N-Term]	0.000105946	2.77511e-05	1	Q643R3	LPCAT4	Lysophospholipid acyltransferase LPCAT4 OS=Homo sapiens OX=9606 GN=LPCAT4 PE=1 SV=1	0	1681.02							2	-1.12	-0.00094	46.7487	39
AENMYAQIK	1xTMT6plex [K9]; 1xTMT6plex [N-Term]	0.000126077	2.77511e-05	1	Q9UPN3	MACF1	Microtubule-actin cross-linking factor 1, isoforms 1/2/3/5 OS=Homo sapiens OX=9606 GN=MACF1 PE=1 SV=4	0	1525.84	97.7	97.4	98.9	98.4	105.2	102.4	2	4.02	0.00306	22.5953	48
AENNPWVTPIADQFQLGVSHVFEYIR	1xTMT6plex [N-Term]	9.74267e-06	0	1	Q15404	RSU1	Ras suppressor protein 1 OS=Homo sapiens OX=9606 GN=RSU1 PE=1 SV=3	0	3259.67	97.4	91.7	87.3	128.7	73.7	121.1	3	9.04	0.00982	53.1307	53
AENNSEVGASGYGVPGPTWDR	1xTMT6plex [N-Term]	7.95398e-11	0	2	Q08211	DHX9	ATP-dependent RNA helicase A OS=Homo sapiens OX=9606 GN=DHX9 PE=1 SV=4	0	2392.14	97.2	103.2	99.6	100.5	100.6	99	2	-0.17	-0.0002	27.1373	101
AENPSLENHR	1xAcetyl [N-Term]; 1xTMT6plex [N-Term]	0.00302306	0.000232546	1	O00505	KPNA3	Importin subunit alpha-4 OS=Homo sapiens OX=9606 GN=KPNA3 PE=1 SV=2	0	1437.73							2	-159392	-114.581	8.8017	23
AENQELK	1xTMT6plex [K7]; 1xTMT6plex [N-Term]	0.0150593	0.00127924	1	Q6NZY4	ZCCHC8	Zinc finger CCHC domain-containing protein 8 OS=Homo sapiens OX=9606 GN=ZCCHC8 PE=1 SV=2	0	1289.75	106.8	103.5	98.7	92.5	94	104.5	2	0.83	0.00053	11.9407	10
AENQPIRDVLK	1xTMT6plex [K11]; 1xTMT6plex [N-Term]	0.0250543	0.00185001	2	P42704	LRPPRC	Leucine-rich PPR motif-containing protein, mitochondrial OS=Homo sapiens OX=9606 GN=LRPPRC PE=1 SV=3	1	1741.04	99	91.4	96.7	96.6	101.3	115	2	2.34	0.00203	18.6083	34
AENQVLAMR	1xOxidation [M8]; 1xTMT6plex [N-Term]	0.117244	0.00460544	2	P51572	BCAP31	B-cell receptor-associated protein 31 OS=Homo sapiens OX=9606 GN=BCAP31 PE=1 SV=3	0	1276.69	109.2	91	98.6	98.7	102.4	100.2	2	1.39	0.00089	12.3092	25
AENSQLTER	1xTMT6plex [N-Term]	0.000247417	2.77511e-05	1	Q9P2E9	RRBP1	Ribosome-binding protein 1 OS=Homo sapiens OX=9606 GN=RRBP1 PE=1 SV=5	0	1276.67	87.7	86.8	94.4	115.5	104.4	111.2	2	1.64	0.00105	9.2271	36
AENSSLNLIGK	1xTMT6plex [K11]; 1xTMT6plex [N-Term]	1.37714e-05	0	2	P46459	NSF	Vesicle-fusing ATPase OS=Homo sapiens OX=9606 GN=NSF PE=1 SV=3	0	1603.94	97.8	95.2	91.1	105.9	108.9	101.2	2	9.74	0.00781	25.8843	49
AENVQSCDTQVSSLLDGVVTMTSR	1xCarbamidomethyl [C7]; 1xTMT6plex [N-Term]	1.07618e-07	0	1	Q99996	AKAP9	A-kinase anchor protein 9 OS=Homo sapiens OX=9606 GN=AKAP9 PE=1 SV=4	0	2826.38	101.3	106.4	108.1	90.9	95	98.2	3	6.39	0.00602	47.5897	64
AEPDHMVLGK	1xTMT6plex [K10]; 1xTMT6plex [N-Term]	2.97742e-05	0	2	P41252	IARS	Isoleucine--tRNA ligase, cytoplasmic OS=Homo sapiens OX=9606 GN=IARS PE=1 SV=2	0	1554.87	97.3	96.5	97.9	101.6	102.9	103.8	2	2.25	0.00175	17.814	45
AEPDYIEDDNPELIRPQK	1xAcetyl [N-Term]; 1xTMT6plex [K18]; 1xTMT6plex [N-Term]	1.79133e-05	0	2	Q9H098	FAM107B	Protein FAM107B OS=Homo sapiens OX=9606 GN=FAM107B PE=1 SV=1	0	2642.37	88.7	97.3	93.9	105	110	105.1	2	-86721.1	-114.575	31.9184	56
AEPEDHYFLLTEPPLNTPENR	1xTMT6plex [N-Term]	1.26351e-06	0	4	P61158	ACTR3	Actin-related protein 3 OS=Homo sapiens OX=9606 GN=ACTR3 PE=1 SV=3	0	2711.35	74.6	105.8	133.8	78	110.3	97.5	3	2.9	0.00262	34.1241	48
AEPEKTEGAAEAK	2xTMT6plex [K5; K13]; 1xTMT6plex [N-Term]	2.06032e-06	0	4	P80723	BASP1	Brain acid soluble protein 1 OS=Homo sapiens OX=9606 GN=BASP1 PE=1 SV=2	1	2018.14	85.7	94.3	84.4	113.7	114.1	107.8	2	0.58	0.00059	11.3726	40
AEPIDIQTWILGYR	1xTMT6plex [N-Term]	0.000126077	2.77511e-05	2	Q92604	LPGAT1	Acyl-CoA:lysophosphatidylglycerol acyltransferase 1 OS=Homo sapiens OX=9606 GN=LPGAT1 PE=1 SV=1	0	1904.05	98.6	98.6	96.5	105.1	110	91.1	3	7.84	0.00497	50.508	29
AEPLETFPFDQSK	1xTMT6plex [K13]; 1xTMT6plex [N-Term]	5.11631e-07	0	1	Q9Y6N5	SQOR	Sulfide:quinone oxidoreductase, mitochondrial OS=Homo sapiens OX=9606 GN=SQOR PE=1 SV=1	0	1967.05	87.7	96.3	86	114.6	109.4	106	2	2.32	0.00228	36.6701	34
AEPMPSASSAPPASSLYSSPVNSSAPLAEDIDPELAR	1xTMT6plex [N-Term]	7.0639e-05	2.77511e-05	1	O14964	HGS	Hepatocyte growth factor-regulated tyrosine kinase substrate OS=Homo sapiens OX=9606 GN=HGS PE=1 SV=1	0	3940.93	90.2	93.2	81.2	109.5	105.4	120.4	4	1.9	0.00187	43.2268	32
AEPPKAPEQEQAAPGPAAGGEAPK	2xTMT6plex [K5; K24]; 1xTMT6plex [N-Term]	3.12381e-07	0	4	P80723	BASP1	Brain acid soluble protein 1 OS=Homo sapiens OX=9606 GN=BASP1 PE=1 SV=2	1	2985.62	90.1	88.7	83.5	115.6	109.6	112.5	2	0.06	9e-05	15.8804	76
AEPPLNASASDQGEK	1xTMT6plex [K15]; 1xTMT6plex [N-Term]	6.9961e-06	0	1	Q9Y4L1	HYOU1	Hypoxia up-regulated protein 1 OS=Homo sapiens OX=9606 GN=HYOU1 PE=1 SV=1	0	1972.04	86.4	75.1	101.4	127.4	110.7	99	2	3.4	0.00335	16.717	65
AEPPQAMNALMR	1xTMT6plex [N-Term]	2.8599e-06	0	3	Q12906	ILF3	Interleukin enhancer-binding factor 3 OS=Homo sapiens OX=9606 GN=ILF3 PE=1 SV=3	0	1557.81	105.2	105.1	104.1	90	98.5	97.2	2	5.19	0.00404	25.1871	50
AEPPQAMNALMR	1xOxidation [M11]; 1xTMT6plex [N-Term]	0.00190094	0.000195329	1	Q12906	ILF3	Interleukin enhancer-binding factor 3 OS=Homo sapiens OX=9606 GN=ILF3 PE=1 SV=3	0	1573.8	99	97.1	99.5	97.7	98.3	108.4	2	4.49	0.00353	19.178	19
AEPPQCTSLAWSADGQTLFAGYTDNLVR	1xCarbamidomethyl [C6]; 1xTMT6plex [N-Term]	8.85486e-11	0	11	P63244	RACK1	Receptor of activated protein C kinase 1 OS=Homo sapiens OX=9606 GN=RACK1 PE=1 SV=3	0	3297.6	101.9	101.8	99.7	95.8	99.6	101.2	3	7.06	0.00776	49.6159	119
AEPQPPSGGLTDEAALSCCSDADPSTK	1xAcetyl [N-Term]; 2xCarbamidomethyl [C18; C19]; 1xTMT6plex [K27]; 1xTMT6plex [N-Term]	4.49632e-05	1.80381e-05	2	Q04760	GLO1	Lactoylglutathione lyase OS=Homo sapiens OX=9606 GN=GLO1 PE=1 SV=4	0	3261.53	99.7	98.8	93.5	105.8	94.9	107.3	3	-70259.7	-76.3847	32.4352	75
AEPTAAPHPVLK	1xTMT6plex [K12]; 1xTMT6plex [N-Term]	0.00271258	0.000212306	1	Q86YP4	GATAD2A	Transcriptional repressor p66-alpha OS=Homo sapiens OX=9606 GN=GATAD2A PE=1 SV=1	0	1689.01							3	1.24	0.0007	14.698	12
AEPTHWCLLVR	1xCarbamidomethyl [C7]; 1xTMT6plex [N-Term]	0.000338723	3.92285e-05	1	Q10570	CPSF1	Cleavage and polyadenylation specificity factor subunit 1 OS=Homo sapiens OX=9606 GN=CPSF1 PE=1 SV=2	0	1610.87							3	3.61	0.00194	25.0813	8
AEPTNPSK	1xTMT6plex [K8]; 1xTMT6plex [N-Term]	0.00144381	0.000142151	1	Q9ULZ3	PYCARD	Apoptosis-associated speck-like protein containing a CARD OS=Homo sapiens OX=9606 GN=PYCARD PE=1 SV=2	0	1301.75	103.1	112.4	100.4	93.9	90.9	99.4	2	0.73	0.00047	9.4232	23
AEPVEVVAPR	1xTMT6plex [N-Term]	6.07895e-05	1.80381e-05	2	P09874	PARP1	Poly [ADP-ribose] polymerase 1 OS=Homo sapiens OX=9606 GN=PARP1 PE=1 SV=4	0	1295.75	109.6	109	100.9	91.7	95.5	93.3	2	4.38	0.00284	17.2383	33
AEPVSPLK	1xAcetyl [N-Term]; 1xTMT6plex [K8]; 1xTMT6plex [N-Term]	0.174815	0.00595064	1	Q8IWA4	MFN1	Mitofusin-1 OS=Homo sapiens OX=9606 GN=MFN1 PE=1 SV=3	0	1340.82							2	-170920	-114.586	55.7744	1
AEPYCSVLPGFTFIQHLPLSER	1xCarbamidomethyl [C5]; 1xTMT6plex [N-Term]	1.71881e-05	0	1	Q9BUJ2	HNRNPUL1	Heterogeneous nuclear ribonucleoprotein U-like protein 1 OS=Homo sapiens OX=9606 GN=HNRNPUL1 PE=1 SV=2	0	2790.45	95.8	101.4	101.6	104	83.9	113.3	4	3.58	0.0025	48.7671	32
AEPYVASEYK	1xTMT6plex [K10]; 1xTMT6plex [N-Term]	2.46812e-05	0	1	Q9BZ29	DOCK9	Dedicator of cytokinesis protein 9 OS=Homo sapiens OX=9606 GN=DOCK9 PE=1 SV=2	0	1614.88	83.2	94.4	85.5	113.3	119.5	104.1	2	1.91	0.00154	20.8076	46
AEQAEADKK	2xTMT6plex [K8; K9]; 1xTMT6plex [N-Term]	0.00048412	3.92285e-05	3	P09493	TPM1	Tropomyosin alpha-1 chain OS=Homo sapiens OX=9606 GN=TPM1 PE=1 SV=2	1	1676.98	92.1	94.1	87.5	112.2	110.5	103.7	2	5.58	0.00468	9.6123	27
AEQAENK	1xTMT6plex [K7]; 1xTMT6plex [N-Term]	0.158992	0.00554773	1	Q9C099	LRRCC1	Leucine-rich repeat and coiled-coil domain-containing protein 1 OS=Homo sapiens OX=9606 GN=LRRCC1 PE=1 SV=2	0	1247.7							2	0.13	8e-05	8.9528	1
AEQDITTLEQSISR	1xTMT6plex [N-Term]	5.67516e-07	0	2	Q9Y608	LRRFIP2	Leucine-rich repeat flightless-interacting protein 2 OS=Homo sapiens OX=9606 GN=LRRFIP2 PE=1 SV=1	0	1819.96	92.8	87.6	96.4	110.8	104.4	108	2	1.21	0.0011	35.9875	47
AEQEAQAPHWWR	1xTMT6plex [N-Term]	2.71182e-05	0	1	Q96DV4	MRPL38	39S ribosomal protein L38, mitochondrial OS=Homo sapiens OX=9606 GN=MRPL38 PE=1 SV=2	0	1737.87	105	96.9	102.9	96.7	98.3	100.3	3	2.96	0.00171	19.6779	30
AEQEEEFISNTLFK	1xTMT6plex [K14]; 1xTMT6plex [N-Term]	7.18417e-08	0	2	Q16204	CCDC6	Coiled-coil domain-containing protein 6 OS=Homo sapiens OX=9606 GN=CCDC6 PE=1 SV=2	0	2143.13	111.2	108.1	108.5	87.4	94.5	90.2	2	2.42	0.00259	44.1958	75
AEQEEYVQEGIR	1xTMT6plex [N-Term]	1.0953e-06	0	1	Q12965	MYO1E	Unconventional myosin-Ie OS=Homo sapiens OX=9606 GN=MYO1E PE=1 SV=2	0	1679.84	101.9	85.2	99.3	102.2	106	105.4	2	2.11	0.00177	18.1732	52
AEQEPTAEQLAQIAAENEEDEHSVNYKPPAQK	1xAcetyl [N-Term]; 2xTMT6plex [K27; K32]; 1xTMT6plex [N-Term]	1.57657e-06	0	4	P52565	ARHGDIA	Rho GDP-dissociation inhibitor 1 OS=Homo sapiens OX=9606 GN=ARHGDIA PE=1 SV=3	0	4294.17	91.7	99.5	79.5	116	107.1	106.2	3	-53363.2	-76.3835	34.3282	38
AEQFYCGDTEGK	1xCarbamidomethyl [C6]; 1xTMT6plex [K12]; 1xTMT6plex [N-Term]	1.38643e-06	0	1	Q02218	OGDH	2-oxoglutarate dehydrogenase, mitochondrial OS=Homo sapiens OX=9606 GN=OGDH PE=1 SV=3	0	1862.9	103.6	109.1	96.7	99.1	100.9	90.6	2	2.41	0.00225	20.9123	48
AEQFYCGDTEGKK	1xCarbamidomethyl [C6]; 2xTMT6plex [K12; K13]; 1xTMT6plex [N-Term]	2.19207e-05	0	1	Q02218	OGDH	2-oxoglutarate dehydrogenase, mitochondrial OS=Homo sapiens OX=9606 GN=OGDH PE=1 SV=3	1	2220.16	101.4	98.1	96.5	100.8	104.8	98.4	3	2.67	0.00197	18.3219	3
AEQLASVQYTLPK	1xTMT6plex [K13]; 1xTMT6plex [N-Term]	6.89791e-06	0	1	Q07157	TJP1	Tight junction protein ZO-1 OS=Homo sapiens OX=9606 GN=TJP1 PE=1 SV=3	0	1906.1							2	0.54	0.00051	30.9145	43
AEQLGAEGNVDESQK	1xTMT6plex [K15]; 1xTMT6plex [N-Term]	3.18802e-09	0	2	Q9NQ29	LUC7L	Putative RNA-binding protein Luc7-like 1 OS=Homo sapiens OX=9606 GN=LUC7L PE=1 SV=1	0	2033.06	104.4	106.4	107.1	87.9	98.4	95.8	2	2.27	0.0023	17.3642	73
AEQINQAAGEASAVLAK	1xTMT6plex [K17]; 1xTMT6plex [N-Term]	6.60414e-11	0	4	Q9UJZ1	STOML2	Stomatin-like protein 2, mitochondrial OS=Homo sapiens OX=9606 GN=STOML2 PE=1 SV=1	0	2129.2	102	99	100.7	100.5	102.7	95.1	2	2.72	0.00289	34.4176	120
AEQLSQENEK	1xTMT6plex [K10]; 1xTMT6plex [N-Term]	7.28392e-05	2.77511e-05	1	Q5M775	SPECC1	Cytospin-B OS=Homo sapiens OX=9606 GN=SPECC1 PE=1 SV=1	0	1633.88	102.6	95.2	98.2	102.5	100.3	101.3	2	1.69	0.00138	13.4483	16
AEQMASVQNAQR	1xTMT6plex [N-Term]	1.05686e-06	0	1	Q9UDY2	TJP2	Tight junction protein ZO-2 OS=Homo sapiens OX=9606 GN=TJP2 PE=1 SV=2	0	1561.8	98	93.9	107.6	94.3	97.4	108.8	2	1.44	0.00113	11.7345	69
AEQMFGEMEVWNAISER	1xTMT6plex [N-Term]	2.80469e-08	0	3	O75400	PRPF40A	Pre-mRNA-processing factor 40 homolog A OS=Homo sapiens OX=9606 GN=PRPF40A PE=1 SV=2	0	2256.06	103.1	90.9	104.1	94.9	99	108	2	4.61	0.0052	49.8705	68
AEQVDPNFYSK	1xTMT6plex [K11]; 1xTMT6plex [N-Term]	2.35403e-05	0	1	Q96DB5	RMDN1	Regulator of microtubule dynamics protein 1 OS=Homo sapiens OX=9606 GN=RMDN1 PE=1 SV=1	0	1755.93	94.3	94.3	91.4	112.3	106.7	101	2	6.07	0.00533	24.3597	34
AEQWNVNYVETSAK	1xTMT6plex [K14]; 1xTMT6plex [N-Term]	2.70615e-08	0	2	P11233	RALA	Ras-related protein Ral-A OS=Homo sapiens OX=9606 GN=RALA PE=1 SV=1	0	2097.1	86.5	104.2	96.7	107.7	107.2	97.7	2	2.87	0.00301	28.6322	86
AERPDVDEK	1xTMT6plex [K9]; 1xTMT6plex [N-Term]	0.0149338	0.00126079	2	Q14204	DYNC1H1	Cytoplasmic dynein 1 heavy chain 1 OS=Homo sapiens OX=9606 GN=DYNC1H1 PE=1 SV=5	0	1516.84	96.7	94.4	87	107.6	109.3	105.1	3	1.58	0.0008	10.13	26
AERPGLQNMELAPVQR	1xTMT6plex [N-Term]	8.95454e-06	0	1	Q6P1M3	LLGL2	LLGL scribble cell polarity complex component 2 OS=Homo sapiens OX=9606 GN=LLGL2 PE=1 SV=2	0	2038.11	95.4	99.3	95.9	105.5	102.3	101.7	3	4.21	0.00286	20.2646	17
AESAEAAK	1xTMT6plex [K8]; 1xTMT6plex [N-Term]	0.00415349	0.000304142	1	P32456	GBP2	Guanylate-binding protein 2 OS=Homo sapiens OX=9606 GN=GBP2 PE=1 SV=3	0	1234.7	76.7	115.7	101.9	112.4	99.9	93.5	2	0.93	0.00058	9.6327	22
AESALAQQAK	1xTMT6plex [K10]; 1xTMT6plex [N-Term]	4.58223e-05	1.80381e-05	3	Q99661	KIF2C	Kinesin-like protein KIF2C OS=Homo sapiens OX=9606 GN=KIF2C PE=1 SV=2	0	1474.86	101.6	94.9	96.3	103.4	103.5	100.3	2	2.48	0.00183	14.6092	32
AESAPLPVSADDTPEVLNR	1xTMT6plex [N-Term]	2.09794e-09	0	2	O95674	CDS2	Phosphatidate cytidylyltransferase 2 OS=Homo sapiens OX=9606 GN=CDS2 PE=1 SV=1	0	2210.15	89.3	89.6	83.2	119.7	107.4	110.9	2	3.2	0.00353	29.5095	80
AESAQASAK	1xTMT6plex [K9]; 1xTMT6plex [N-Term]	0.000343186	3.92285e-05	1	Q9H0R5; P32455	GBP3; GBP1	Guanylate-binding protein 3 OS=Homo sapiens OX=9606 GN=GBP3 PE=1 SV=3;Guanylate-binding protein 1 OS=Homo sapiens OX=9606 GN=GBP1 PE=1 SV=2	0	1320.75							2	1.77	0.00117	8.5547	26
AESAVIVANPR	1xTMT6plex [N-Term]	1.89255e-05	0	1	Q9NQC3	RTN4	Reticulon-4 OS=Homo sapiens OX=9606 GN=RTN4 PE=1 SV=2	0	1355.78	94	99.6	128.1	104.6	78.7	95	2	2.37	0.00161	15.2172	31
AESDFVK	1xTMT6plex [K7]; 1xTMT6plex [N-Term]	0.0146862	0.00125279	1	Q14684	RRP1B	Ribosomal RNA processing protein 1 homolog B OS=Homo sapiens OX=9606 GN=RRP1B PE=1 SV=3	0	1253.71	108.1	103.3	111.2	89.6	96.1	91.7	2	2.13	0.00134	18.1889	26
AESDGSLLLESK	1xTMT6plex [K12]; 1xTMT6plex [N-Term]	1.27256e-06	0	1	Q5MIZ7; Q6IN85	PPP4R3B; PPP4R3A	Serine/threonine-protein phosphatase 4 regulatory subunit 3B OS=Homo sapiens OX=9606 GN=PPP4R3B PE=1 SV=2;Serine/threonine-protein phosphatase 4 regulatory subunit 3A OS=Homo sapiens OX=9606 GN=PPP4R3A PE=1 SV=1	0	1706.96	106.4	103.8	103.5	96.6	92.2	97.5	2	-0.26	-0.00023	27.5226	50
AESDWDTVTVLR	1xAcetyl [N-Term]; 1xTMT6plex [N-Term]	0.000222584	2.77511e-05	2	O60869	EDF1	Endothelial differentiation-related factor 1 OS=Homo sapiens OX=9606 GN=EDF1 PE=1 SV=1	0	1662.85							2	-137810	-114.579	39.7025	51
AESEEMETSQAGSK	1xTMT6plex [K14]; 1xTMT6plex [N-Term]	4.68428e-05	1.80381e-05	1	P34932	HSPA4	Heat shock 70 kDa protein 4 OS=Homo sapiens OX=9606 GN=HSPA4 PE=1 SV=4	0	1941.95	102.5	92.3	100.7	109.5	99.4	95.6	3	0.94	0.00061	13.4703	30
AESEQEAYLR	1xTMT6plex [N-Term]	0.000448172	3.92285e-05	1	Q9NR28	DIABLO	Diablo homolog, mitochondrial OS=Homo sapiens OX=9606 GN=DIABLO PE=1 SV=1	0	1424.72	102.2	99.8	103.1	100.8	96.6	97.4	2	2.2	0.00157	14.6575	25
AESEQLAR	1xTMT6plex [N-Term]	0.0413174	0.00248415	1	Q13464	ROCK1	Rho-associated protein kinase 1 OS=Homo sapiens OX=9606 GN=ROCK1 PE=1 SV=1	0	1132.62	99.2	97.9	101.5	98.1	101.4	101.9	2	3.17	0.00179	9.3565	11
AESFFQTK	1xTMT6plex [K8]; 1xTMT6plex [N-Term]	0.0013958	0.000142151	1	P13798	APEH	Acylamino-acid-releasing enzyme OS=Homo sapiens OX=9606 GN=APEH PE=1 SV=4	0	1415.79	100.9	98.7	93.4	98.3	108.9	99.7	2	2	0.00141	26.2006	29
AESGALIEAAK	1xTMT6plex [K11]; 1xTMT6plex [N-Term]	1.26672e-05	0	1	Q9H9A5	CNOT10	CCR4-NOT transcription complex subunit 10 OS=Homo sapiens OX=9606 GN=CNOT10 PE=1 SV=1	0	1517.89	95.5	100.7	100.2	94.8	93.2	115.6	2	2.92	0.00222	21.882	53
AESGDSLGSEDRDLLYSIDAYR	1xTMT6plex [N-Term]	7.47309e-07	0	1	Q9NQW6	ANLN	Anillin OS=Homo sapiens OX=9606 GN=ANLN PE=1 SV=2	1	2661.28	108.2	91.6	104.2	113.4	88	94.6	3	3.52	0.00312	36.987	27
AESGKEEDKK	3xTMT6plex [K5; K9; K10]; 1xTMT6plex [N-Term]	0.00499229	0.000395322	1	Q99442	SEC62	Translocation protein SEC62 OS=Homo sapiens OX=9606 GN=SEC62 PE=1 SV=1	2	2037.2	78.4	87.3	83.4	117.4	89.7	143.8	3	2.23	0.00151	9.1183	3
AESGPDLR	1xTMT6plex [N-Term]	0.161286	0.00560753	1	P15924	DSP	Desmoplakin OS=Homo sapiens OX=9606 GN=DSP PE=1 SV=3	0	1073.58	104.8	98.9	101.8	100.2	96.2	98.1	2	3.35	0.0018	10.4961	16
AESIDKK	2xTMT6plex [K6; K7]; 1xTMT6plex [N-Term]	0.00975152	0.000766203	2	Q9NZZ3	CHMP5	Charged multivesicular body protein 5 OS=Homo sapiens OX=9606 GN=CHMP5 PE=1 SV=1	1	1477.92	103	99.3	100.4	100.8	103.1	93.4	2	2.02	0.00149	11.8636	26
AESLIGVYPEQGDCVISK	1xCarbamidomethyl [C14]; 1xTMT6plex [K18]; 1xTMT6plex [N-Term]	3.84368e-07	0	2	Q14683	SMC1A	Structural maintenance of chromosomes protein 1A OS=Homo sapiens OX=9606 GN=SMC1A PE=1 SV=2	0	2423.29	104.5	104.9	107.5	96.9	95.3	90.9	2	5.09	0.00616	36.3595	84
AESIIIR	1xAcetyl [N-Term]; 1xTMT6plex [N-Term]	0.0106035	0.00084023	1	Q8TAT6	NPLOC4	Nuclear protein localization protein 4 homolog OS=Homo sapiens OX=9606 GN=NPLOC4 PE=1 SV=3	0	1072.66							2	-213638	-114.58	26.0633	46
AESLQQEVEALK	1xTMT6plex [K12]; 1xTMT6plex [N-Term]	5.93127e-05	1.80381e-05	1	Q14203	DCTN1	Dynactin subunit 1 OS=Homo sapiens OX=9606 GN=DCTN1 PE=1 SV=3	0	1803.03	99	101.8	100.1	98.5	98.4	102.2	3	3.12	0.00187	36.0333	41
AESLQQEVEALKER	1xTMT6plex [K12]; 1xTMT6plex [N-Term]	1.00548e-07	0	1	Q14203	DCTN1	Dynactin subunit 1 OS=Homo sapiens OX=9606 GN=DCTN1 PE=1 SV=3	1	2088.17	91.8	92.8	92.2	111	103.1	109.1	3	3.5	0.00243	32.6552	37
AESLQVTR	1xTMT6plex [N-Term]	0.00145082	0.000142151	1	P46459	NSF	Vesicle-fusing ATPase OS=Homo sapiens OX=9606 GN=NSF PE=1 SV=3	0	1132.65	98.1	95.5	100	99.3	99.4	107.7	2	2.84	0.00161	12.6189	41
AESITLDLGSQIK	1xTMT6plex [K13]; 1xTMT6plex [N-Term]	2.1847e-07	0	2	Q03169	TNFAIP2	Tumor necrosis factor alpha-induced protein 2 OS=Homo sapiens OX=9606 GN=TNFAIP2 PE=2 SV=2	0	1833.07	94.1	99.7	99.7	105	100.3	101.2	2	1.77	0.00162	35.2214	56
AESMLQQADK	1xTMT6plex [K10]; 1xTMT6plex [N-Term]	2.50165e-05	0	1	P13797	PLS3	Plastin-3 OS=Homo sapiens OX=9606 GN=PLS3 PE=1 SV=4	0	1578.86	92	94.5	89.6	109.6	110.4	103.9	2	3.92	0.00309	20.6261	58
AESPEEVACR	1xCarbamidomethyl [C9]; 1xTMT6plex [N-Term]	0.0110975	0.00089687	1	Q7Z6Z7	HUWE1	E3 ubiquitin-protein ligase HUWE1 OS=Homo sapiens OX=9606 GN=HUWE1 PE=1 SV=3	0	1376.67	105.4	109.1	99.8	94.2	94.5	97.1	2	0.64	0.00044	11.5671	37
AESQASSLGQK	1xTMT6plex [K11]; 1xTMT6plex [N-Term]	2.61355e-05	0	1	P37275	ZEB1	Zinc finger E-box-binding homeobox 1 OS=Homo sapiens OX=9606 GN=ZEB1 PE=1 SV=2	0	1563.87	103.4	97.8	103.3	97.3	98.2	100	2	2.3	0.0018	12.9686	18
AESQLLECK	1xCarbamidomethyl [C8]; 1xTMT6plex [K9]; 1xTMT6plex [N-Term]	0.000243383	2.77511e-05	2	P12270	TPR	Nucleoprotein TPR OS=Homo sapiens OX=9606 GN=TPR PE=1 SV=3	0	1535.85	101.7	101.8	102	96	98.9	99.6	2	4	0.00307	21.6171	28
AESQNTFEETELELKK	2xTMT6plex [K15; K16]; 1xTMT6plex [N-Term]	1.96247e-07	0	1	Q5JSH3	WDR44	WD repeat-containing protein 44 OS=Homo sapiens OX=9606 GN=WDR44 PE=1 SV=1	1	2583.41	96.8	95	95.3	108.6	103.9	100.3	3	-1.04	-0.00089	28.8928	22
AESSFSEEEEEKLQAAFSLEK	2xTMT6plex [K12; K21]; 1xTMT6plex [N-Term]	1.00202e-05	0	2	Q9Y6G5	COMMD10	COMM domain-containing protein 10 OS=Homo sapiens OX=9606 GN=COMMD10 PE=1 SV=1	1	3075.6	97.9	93.6	90.6	112.5	108.4	97	3	5.33	0.00547	43.5453	25
AESTPEIAEQR	1xTMT6plex [N-Term]	0.00243514	0.000201691	1	Q13098	GPS1	COP9 signalosome complex subunit 1 OS=Homo sapiens OX=9606 GN=GPS1 PE=1 SV=4	0	1459.76	93.8	96.6	105.9	98.1	104.9	100.7	2	0.72	0.00053	12.4791	59
AESVAAPITVR	1xTMT6plex [N-Term]	6.46355e-05	2.77511e-05	1	Q96K76	USP47	Ubiquitin carboxyl-terminal hydrolase 47 OS=Homo sapiens OX=9606 GN=USP47 PE=1 SV=3	0	1342.79	87.9	96.8	112.2	108.9	95.1	99.1	2	2.67	0.0018	18.6968	44
AESVATK	1xTMT6plex [K7]; 1xTMT6plex [N-Term]	0.0159751	0.00139738	1	Q99996	AKAP9	A-kinase anchor protein 9 OS=Homo sapiens OX=9606 GN=AKAP9 PE=1 SV=4	0	1163.7							2	1.3	0.00076	10.8161	12
AETAANR	1xTMT6plex [N-Term]	0.0144435	0.00122622	1	P12814; O43707	ACTN1; ACTN4	Alpha-actinin-1 OS=Homo sapiens OX=9606 GN=ACTN1 PE=1 SV=2;Alpha-actinin-4 OS=Homo sapiens OX=9606 GN=ACTN4 PE=1 SV=2	0	961.526	105.7	100.9	103.3	89.2	97.7	103.3	2	1.7	0.00082	7.1832	24
AETDHLFDLSR	1xTMT6plex [N-Term]	0.00129875	0.000142151	1	Q9NPF5	DMAP1	DNA methyltransferase 1-associated protein 1 OS=Homo sapiens OX=9606 GN=DMAP1 PE=1 SV=1	0	1532.79	102.5	97.3	106.6	91.9	97.1	104.5	3	4.03	0.00206	24.5467	19
AETEALSK	1xAcetyl [N-Term]; 1xTMT6plex [K8]; 1xTMT6plex [N-Term]	0.0148094	0.00126079	1	Q9BUP3	HTATIP2	Oxidoreductase HTATIP2 OS=Homo sapiens OX=9606 GN=HTATIP2 PE=1 SV=2	0	1348.77	90.2	91.8	103.3	106.2	98.2	110.3	2	-169903	-114.58	19.5812	28
AETECQNTEYQQLLDIK	1xCarbamidomethyl [C5]; 1xTMT6plex [K17]; 1xTMT6plex [N-Term]	2.76307e-09	0	2	P13645	KRT10	Keratin, type I cytoskeletal 10 OS=Homo sapiens OX=9606 GN=KRT10 PE=1 SV=6	0	2541.29	142.5	92	97.3	77.4	72.3	118.6	2	3.13	0.00397	35.8068	108
AETEEGPDVLR	1xTMT6plex [N-Term]	0.000428407	3.92285e-05	1	Q15436	SEC23A	Protein transport protein Sec23A OS=Homo sapiens OX=9606 GN=SEC23A PE=1 SV=2	0	1444.75	97.8	97.4	89.4	104.8	104	106.6	2	1.85	0.00134	16.6896	49
AETEELIR	1xTMT6plex [N-Term]	0.00382967	0.000283562	1	P29590	PML	Protein PML OS=Homo sapiens OX=9606 GN=PML PE=1 SV=3	0	1189.66	100.6	95.1	91.5	103.3	107.1	102.4	2	3.03	0.0018	16.5707	19
AETEQQCLSLK	1xCarbamidomethyl [C7]; 1xTMT6plex [K11]; 1xTMT6plex [N-Term]	9.17772e-06	0	1	Q8IWJ2	GCC2	GRIP and coiled-coil domain-containing protein 2 OS=Homo sapiens OX=9606 GN=GCC2 PE=1 SV=4	0	1764.96	93.8	80.8	95.5	118.4	108.6	103	2	1.58	0.0014	20.3454	59
AETLAGAMPNEAGGHPDAR	1xTMT6plex [N-Term]	3.69526e-06	0	1	Q9Y613	FHOD1	FH1/FH2 domain-containing protein 1 OS=Homo sapiens OX=9606 GN=FHOD1 PE=1 SV=3	0	2094.02	107.3	91.6	107.6	100.7	91.2	101.7	3	3.42	0.00239	17.4277	33
AETLASSLQEDLAHTR	1xTMT6plex [N-Term]	1.5389e-05	0	1	Q69YQ0	SPECC1L	Cytospin-A OS=Homo sapiens OX=9606 GN=SPECC1L PE=1 SV=2	0	1971.03	90.2	99.9	116.9	89.5	99.7	103.9	3	5.36	0.00352	31.2084	27
AETLEFNDVYQEVK	1xAcetyl [N-Term]; 1xTMT6plex [K14]; 1xTMT6plex [N-Term]	0.000826849	7.57932e-05	2	Q08945	SSRP1	FACT complex subunit SSRP1 OS=Homo sapiens OX=9606 GN=SSRP1 PE=1 SV=1	0	2185.14	100.8	101	102.4	98.5	99.8	97.5	2	-104870	-114.578	45.2588	63
AETLELSDLYVSDK	1xTMT6plex [K14]; 1xTMT6plex [N-Term]	6.68826e-08	0	2	Q8NDI1	EHBP1	EH domain-binding protein 1 OS=Homo sapiens OX=9606 GN=EHBP1 PE=1 SV=3	0	2041.11	87.2	86	95.9	95.4	96.6	138.9	2	1.43	0.00146	38.6554	78
AETLMTVTDPVHDIAFAPNLGR	1xTMT6plex [N-Term]	6.85882e-07	0	2	Q96EE3	SEH1L	Nucleoporin SEH1 OS=Homo sapiens OX=9606 GN=SEH1L PE=1 SV=3	0	2597.36	110	95.4	93.4	104.4	96.7	100.1	3	-7.06	-0.00611	42.3985	36
AETLPGSGDSGPGTASLGPGVAETGTR	1xAcetyl [N-Term]; 1xTMT6plex [N-Term]	2.30665e-05	0	1	Q14151	SAFB2	Scaffold attachment factor B2 OS=Homo sapiens OX=9606 GN=SAFB2 PE=1 SV=1	0	2713.35							3	-84457.8	-76.3877	30.9279	68
AETLSGLGDSGAAGAAALSSASSETGTR	1xAcetyl [N-Term]; 1xTMT6plex [N-Term]	1.19333e-06	0	2	Q15424	SAFB	Scaffold attachment factor B1 OS=Homo sapiens OX=9606 GN=SAFB PE=1 SV=4	0	2766.36							2	-82835.2	-114.576	39.2248	103
AETLVTLDFTSR	1xTMT6plex [N-Term]	0.00038999	3.92285e-05	1	Q15334	LLGL1	Lethal(2) giant larvae protein homolog 1 OS=Homo sapiens OX=9606 GN=LLGL1 PE=1 SV=3	0	1581.87	89.5	106.1	96.2	115.7	82.4	110.1	3	0.51	0.00027	36.2155	22
AETPTAAEDDNEGDKK	2xTMT6plex [K15; K16]; 1xTMT6plex [N-Term]	4.325e-07	0	1	O60841	EIF5B	Eukaryotic translation initiation factor 5B OS=Homo sapiens OX=9606 GN=EIF5B PE=1 SV=4	1	2378.23	121.7	111.6	106.2	85.5	92.4	82.6	3	1.73	0.00137	12.8174	31
AETPTESVSEPEVATK	1xTMT6plex [K16]; 1xTMT6plex [N-Term]	1.35812e-05	0	2	P18858	LIG1	DNA ligase 1 OS=Homo sapiens OX=9606 GN=LIG1 PE=1 SV=1	0	2133.13	98.9	97.6	97.2	97.9	102.3	106.1	2	3.04	0.00325	20.1142	81
AETSDVANAVLDGADCIMLSGETAK	1xCarbamidomethyl [C16]; 1xOxidation [M18]; 1xTMT6plex [K25]; 1xTMT6plex [N-Term]	0.11781	0.00460544	1	P30613	PKLR	Pyruvate kinase PKLR OS=Homo sapiens OX=9606 GN=PKLR PE=1 SV=2	0	3012.49							3	-4.4	-0.00442	40.4494	14
AETVPEEANYEAVPVEAYGLAMLR	1xTMT6plex [N-Term]	4.93664e-07	0	1	Q92917	GPKOW	G-patch domain and KOW motifs-containing protein OS=Homo sapiens OX=9606 GN=GPKOW PE=1 SV=2	0	2851.44	109.8	97.7	94.4	95.4	104.1	98.6	3	1.71	0.00162	49.3882	43
AETYDFLFK	1xAcetyl [N-Term]; 1xTMT6plex [K9]; 1xTMT6plex [N-Term]	0.110142	0.00447984	1	P61018	RAB4B	Ras-related protein Rab-4B OS=Homo sapiens OX=9606 GN=RAB4B PE=1 SV=1	0	1633.89	88	97.2	93.1	106.5	111.2	104	2	-140249	-114.576	51.1276	40
AEVAAEFLNDR	1xTMT6plex [N-Term]	1.00907e-05	0	2	Q8TBC4	UBA3	NEDD8-activating enzyme E1 catalytic subunit OS=Homo sapiens OX=9606 GN=UBA3 PE=1 SV=2	0	1463.77	104.8	103.6	100.4	98.4	97.4	95.4	3	0.87	0.00043	30.3553	49
AEVAAIYEPPQIGTQNSLELLEDPK	1xTMT6plex [K25]; 1xTMT6plex [N-Term]	0.000183686	2.77511e-05	1	Q8TAT6	NPLOC4	Nuclear protein localization protein 4 homolog OS=Homo sapiens OX=9606 GN=NPLOC4 PE=1 SV=3	0	3183.72	99.6	118.6	101.6	86.9	94.5	98.8	3	0.55	0.00058	46.8292	10
AEVADEK	1xTMT6plex [K7]; 1xTMT6plex [N-Term]	0.00338638	0.000252074	1	P17252	PRKCA	Protein kinase C alpha type OS=Homo sapiens OX=9606 GN=PRKCA PE=1 SV=4	0	1219.69	91.3	102.2	96.9	107.3	101.8	100.4	2	1.68	0.00102	11.8562	28
AEVAQAK	1xTMT6plex [K7]; 1xTMT6plex [N-Term]	0.0150593	0.00127924	2	Q9ULW3	ABT1	Activator of basal transcription 1 OS=Homo sapiens OX=9606 GN=ABT1 PE=1 SV=1	0	1174.72	99.6	92.4	101.8	100.1	101	105.1	2	2.96	0.00174	10.4564	19
AEVDAEKPGATDR	1xTMT6plex [K7]; 1xTMT6plex [N-Term]	9.3077e-06	0	2	Q92888	ARHGEF1	Rho guanine nucleotide exchange factor 1 OS=Homo sapiens OX=9606 GN=ARHGEF1 PE=1 SV=2	0	1816.98	98.3	100.4	95.7	100.8	108.7	96.2	2	0.88	0.0008	12.2728	47
AEVDDVIQVR	1xTMT6plex [N-Term]	8.58183e-05	2.77511e-05	1	P12259	F5	Coagulation factor V OS=Homo sapiens OX=9606 GN=F5 PE=1 SV=4	0	1372.76	96.8	95.5	97.9	101.8	109.1	99	2	1.68	0.00116	23.8896	22
AEVDLVVQDLK	1xTMT6plex [K11]; 1xTMT6plex [N-Term]	5.30831e-06	0	2	Q96I15	SCLY	Selenocysteine lyase OS=Homo sapiens OX=9606 GN=SCLY PE=1 SV=4	0	1687	107.5	99.7	100.1	100	95.2	97.5	2	2.89	0.00244	38.4634	64
AEVEAIMEQLK	1xTMT6plex [K11]; 1xTMT6plex [N-Term]	0.00183585	0.000195329	1	Q5BJF6	ODF2	Outer dense fiber protein 2 OS=Homo sapiens OX=9606 GN=ODF2 PE=1 SV=1	0	1718.98	102.7	96.2	102.9	87.9	101.1	109.2	3	2.81	0.00161	44.205	16
AEVEQVELPDGK	1xTMT6plex [K12]; 1xTMT6plex [N-Term]	2.4268e-05	0	1	Q9NW13	RBM28	RNA-binding protein 28 OS=Homo sapiens OX=9606 GN=RBM28 PE=1 SV=3	0	1771.98	109.7	105	105.4	94.6	91.9	93.3	2	3.5	0.0031	25.7825	49
AEVETISK	1xTMT6plex [K8]; 1xTMT6plex [N-Term]	0.000674121	7.57932e-05	1	P57764	GSDMD	Gasdermin-D OS=Homo sapiens OX=9606 GN=GSDMD PE=1 SV=1	0	1334.79	139.6	114.3	99.9	78.8	83.4	84	2	2.09	0.0014	16.8762	38
AEVEVADELLENLAK	1xTMT6plex [K15]; 1xTMT6plex [N-Term]	2.29416e-09	0	2	Q7L5D6	GET4	Golgi to ER traffic protein 4 homolog OS=Homo sapiens OX=9606 GN=GET4 PE=1 SV=1	0	2101.18	98.6	96.7	96.7	106.6	104.2	97.2	2	3.82	0.00402	52.248	124
AEVGKDER	1xTMT6plex [K5]; 1xTMT6plex [N-Term]	0.0106035	0.00084023	1	O43491	EPB41L2	Band 4.1-like protein 2 OS=Homo sapiens OX=9606 GN=EPB41L2 PE=1 SV=1	1	1361.78	94	94.6	102.6	97	105.6	106.3	2	2.66	0.00181	8.711	21
AEVLQSTQR	1xTMT6plex [N-Term]	0.000143978	2.77511e-05	1	Q9Y520	PRRC2C	Protein PRRC2C OS=Homo sapiens OX=9606 GN=PRRC2C PE=1 SV=4	0	1260.71	101.9	105.7	110	91.1	94.8	96.4	2	0.14	9e-05	12.1429	39
AEVLSEEPILK	1xTMT6plex [K11]; 1xTMT6plex [N-Term]	5.73872e-06	0	2	Q7L1Q6	BZW1	Basic leucine zipper and W2 domain-containing protein 1 OS=Homo sapiens OX=9606 GN=BZW1 PE=1 SV=1	0	1686.01	99	92	99.4	101.9	107.1	100.7	2	2.82	0.00238	30.7633	58
AEVITCDVLLVCIGR	2xCarbamidomethyl [C6; C12]; 1xTMT6plex [N-Term]	3.61724e-06	0	7	P09622	DLD	Dihydrolipoyl dehydrogenase, mitochondrial OS=Homo sapiens OX=9606 GN=DLD PE=1 SV=2	0	1947.06	94.4	97.9	102.5	98.2	102.6	104.4	2	0.69	0.00067	45.6641	44
AEVLWLMGAK	1xTMT6plex [K10]; 1xTMT6plex [N-Term]	1.75471e-05	0	2	O94906	PRPF6	Pre-mRNA-processing factor 6 OS=Homo sapiens OX=9606 GN=PRPF6 PE=1 SV=1	0	1575.93	106.7	100.2	105.2	98	94.4	95.4	2	3.24	0.00256	45.0088	65
AEVPEDKPK	2xTMT6plex [K7; K9]; 1xTMT6plex [N-Term]	0.0158401	0.00138963	2	O95757	HSPA4L	Heat shock 70 kDa protein 4L OS=Homo sapiens OX=9606 GN=HSPA4L PE=1 SV=3	0	1700.02	97.9	98.8	103.3	97.4	101.9	100.8	2	3.13	0.00266	12.8297	24
AEVQHQLHVAVGSLQESILAQVQR	1xTMT6plex [N-Term]	1.87332e-07	0	1	Q6P2E9	EDC4	Enhancer of mRNA-decapping protein 4 OS=Homo sapiens OX=9606 GN=EDC4 PE=1 SV=1	0	2869.58	95	103.4	105.4	105.7	93	97.4	4	2.49	0.00179	39.7922	25
AEVQNLGGELVVSGVDSAMSLIQAAK	1xTMT6plex [K26]; 1xTMT6plex [N-Term]	8.05024e-09	0	2	P35221	CTNNA1	Catenin alpha-1 OS=Homo sapiens OX=9606 GN=CTNNA1 PE=1 SV=1	0	3044.67	115	102.4	105.3	82.2	98.1	97	3	8.48	0.0086	55.0252	88
AEVQNLGGELVVSGVDSAMSLIQAAK	1xOxidation [M19]; 1xTMT6plex [K26]; 1xTMT6plex [N-Term]	4.26197e-08	0	1	P35221	CTNNA1	Catenin alpha-1 OS=Homo sapiens OX=9606 GN=CTNNA1 PE=1 SV=1	0	3060.67	106	112.5	112	87.9	100.3	81.3	3	4.63	0.00472	55.0277	80
AEVQVLVLDGR	1xAcetyl [N-Term]; 1xTMT6plex [N-Term]	0.000301428	2.77511e-05	4	P40429	RPL13A	60S ribosomal protein L13a OS=Homo sapiens OX=9606 GN=RPL13A PE=1 SV=2	0	1469.85							2	-155905	-114.579	39.3698	66
AEVSELK	1xTMT6plex [K7]; 1xTMT6plex [N-Term]	0.00887694	0.000658429	2	P67936	TPM4	Tropomyosin alpha-4 chain OS=Homo sapiens OX=9606 GN=TPM4 PE=1 SV=3	0	1233.75	100.3	96.1	99.1	97.5	104.3	102.8	2	-1.24	-0.00077	17.3968	33
AEVSIQNNK	1xTMT6plex [K9]; 1xTMT6plex [N-Term]	0.000309286	3.92285e-05	2	O75369	FLNB	Filamin-B OS=Homo sapiens OX=9606 GN=FLNB PE=1 SV=2	0	1460.85	108.4	101.8	106.3	90.5	99.4	93.6	2	0.52	0.00038	14.3628	21
AEVSPMYGVQK	1xTMT6plex [K11]; 1xTMT6plex [N-Term]	0.000438166	3.92285e-05	1	Q9H3K2	GHITM	Growth hormone-inducible transmembrane protein OS=Homo sapiens OX=9606 GN=GHITM PE=1 SV=2	0	1666.92							2	2.14	0.00178	23.1814	16
AEVSQPR	1xTMT6plex [N-Term]	0.0146862	0.00125279	1	P22314	UBA1	Ubiquitin-like modifier-activating enzyme 1 OS=Homo sapiens OX=9606 GN=UBA1 PE=1 SV=3	0	1015.57	95.6	92.8	100.8	100.2	106.9	103.6	2	-1.17	-0.00059	8.0687	32
AEVTAPDVK	1xTMT6plex [K9]; 1xTMT6plex [N-Term]	0.000146573	2.77511e-05	1	Q8IVF2	AHNAK2	Protein AHNAK2 OS=Homo sapiens OX=9606 GN=AHNAK2 PE=1 SV=2	0	1387.82	87	81.6	79.4	124	112.7	115.3	2	4.34	0.00301	17.0209	41
AEVVDEIAAK	1xTMT6plex [K10]; 1xTMT6plex [N-Term]	1.78518e-05	0	1	Q8TAT6	NPLOC4	Nuclear protein localization protein 4 homolog OS=Homo sapiens OX=9606 GN=NPLOC4 PE=1 SV=3	0	1502.88	105	110	108.8	92.5	94	89.7	2	2.32	0.00175	27.277	67
AEVVETTQVYTEEETR	1xTMT6plex [N-Term]	1.47334e-08	0	2	Q15149	PLEC	Plectin OS=Homo sapiens OX=9606 GN=PLEC PE=1 SV=3	0	2113.05	97.4	97.3	92.8	102.6	105.2	104.6	2	2.67	0.00282	24.5679	73
AEVVETTQVYTEEETRR	1xTMT6plex [N-Term]	2.83634e-07	0	3	Q15149	PLEC	Plectin OS=Homo sapiens OX=9606 GN=PLEC PE=1 SV=3	1	2269.15	96.3	93	91.6	111.4	103.9	103.9	2	1.61	0.00183	21.1806	50
AEVVLGNIIK	1xTMT6plex [K10]; 1xTMT6plex [N-Term]	0.000804081	7.57932e-05	1	Q13303	KCNAB2	Voltage-gated potassium channel subunit beta-2 OS=Homo sapiens OX=9606 GN=KCNAB2 PE=1 SV=2	0	1513.97	86.4	107.3	113.9	93.5	100.9	98.1	3	2.51	0.00127	35.3664	21
AEVVSLLLDR	1xTMT6plex [N-Term]	4.39786e-05	1.80381e-05	1	Q8IWZ3	ANKHD1	Ankyrin repeat and KH domain-containing protein 1 OS=Homo sapiens OX=9606 GN=ANKHD1 PE=1 SV=1	0	1343.81	96.1	93.2	96.8	106.7	103.1	104.2	2	2.03	0.00136	40.9949	33
AEVWDLDMLR	1xTMT6plex [N-Term]	3.20244e-05	0	1	Q6P2E9	EDC4	Enhancer of mRNA-decapping protein 4 OS=Homo sapiens OX=9606 GN=EDC4 PE=1 SV=1	0	1476.77	95.1	103.9	101.8	102.6	99	97.5	2	3.44	0.00254	42.1676	44
AEVWQLLAGCHDNQAMLDR	1xCarbamidomethyl [C10]; 1xTMT6plex [N-Term]	9.69564e-09	0	1	Q5R372	RABGAP1L	Rab GTPase-activating protein 1-like OS=Homo sapiens OX=9606 GN=RABGAP1L PE=1 SV=1	0	2456.2	96.6	101.1	95.2	105.1	101.7	100.2	3	5.02	0.00411	39.3743	63
AEWADIDPVPQNDGPNPVVQIIYSDK	1xTMT6plex [K26]; 1xTMT6plex [N-Term]	1.61528e-05	0	1	P49354	FNTA	Protein farnesyltransferase/geranylgeranyltransferase type-1 subunit alpha OS=Homo sapiens OX=9606 GN=FNTA PE=1 SV=1	0	3338.73	101.7	98	95.7	106.1	101.9	96.6	3	3.16	0.00351	51.6141	61
AEWLLAVR	1xTMT6plex [N-Term]	0.00215519	0.000201691	2	Q9NRN7	AASDHPPT	L-aminoadipate-semialdehyde dehydrogenase-phosphopantetheinyl transferase OS=Homo sapiens OX=9606 GN=AASDHPPT PE=1 SV=2	0	1186.71	114.5	110.5	113.9	87.4	83.9	89.8	2	3.98	0.00236	35.6413	25
AEWLYSQGK	1xTMT6plex [K9]; 1xTMT6plex [N-Term]	0.000335784	3.92285e-05	1	Q8IW35	CEP97	Centrosomal protein of 97 kDa OS=Homo sapiens OX=9606 GN=CEP97 PE=1 SV=1	0	1539.86	94.5	97.1	95	106.3	101.5	105.6	2	4.49	0.00346	28.0305	18
AEWMIAAQTCFK	1xCarbamidomethyl [C10]; 1xTMT6plex [K12]; 1xTMT6plex [N-Term]	9.43947e-06	0	2	O60488	ACSL4	Long-chain-fatty-acid--CoA ligase 4 OS=Homo sapiens OX=9606 GN=ACSL4 PE=1 SV=2	0	1914	98.8	100.2	103.1	101.4	101.4	95.1	2	-0.2	-0.0002	39.9546	55
AEWQVYK	1xTMT6plex [K7]; 1xTMT6plex [N-Term]	0.00872464	0.000640067	1	Q00059	TFAM	Transcription factor A, mitochondrial OS=Homo sapiens OX=9606 GN=TFAM PE=1 SV=1	0	1381.79	112.9	116.8	106.3	89.5	92.4	82.1	2	2.65	0.00183	25.27	26
AEWQVYKEEISR	1xTMT6plex [K7]; 1xTMT6plex [N-Term]	2.16243e-05	0	2	Q00059	TFAM	Transcription factor A, mitochondrial OS=Homo sapiens OX=9606 GN=TFAM PE=1 SV=1	1	1996.09	102.4	107.7	103.3	93.4	96	97.3	2	2.07	0.00207	29.5008	30
AEYEFDSPYWDDISDSAK	1xTMT6plex [K18]; 1xTMT6plex [N-Term]	8.25802e-06	0	2	Q8IU85; Q14012	CAMK1D; CAMK1	Calcium/calmodulin-dependent protein kinase type 1D OS=Homo sapiens OX=9606 GN=CAMK1D PE=1 SV=1;Calcium/calmodulin-dependent protein kinase type 1 OS=Homo sapiens OX=9606 GN=CAMK1 PE=1 SV=1	0	2596.21	95.3	100.1	91.2	111.2	103.1	99.1	2	1.61	0.00209	42.9676	82
AEYEGDGIPTVFVAVAGR	1xTMT6plex [N-Term]	5.6096e-09	0	4	P22234	PAICS	Multifunctional protein ADE2 OS=Homo sapiens OX=9606 GN=PAICS PE=1 SV=3	0	2080.09	102.9	105.7	103.1	95.8	95.7	96.7	2	0.76	0.00079	40.803	97
AEYGTLLQDLTNNITLEDLEQLK	1xAcetyl [N-Term]; 1xTMT6plex [K23]; 1xTMT6plex [N-Term]	7.37394e-05	2.77511e-05	1	Q15121	PEA15	Astrocytic phosphoprotein PEA-15 OS=Homo sapiens OX=9606 GN=PEA15 PE=1 SV=2	0	3134.69	97.6	96.7	91.6	98.4	114.6	101	2	-73099.9	-114.573	55.5228	89
AEYLASIFGTEK	1xAcetyl [N-Term]; 1xTMT6plex [K12]; 1xTMT6plex [N-Term]	0.0201019	0.00166647	1	P0DN76	U2AF1L5	Splicing factor U2AF 35 kDa subunit-like protein OS=Homo sapiens OX=9606 GN=U2AF1L5 PE=1 SV=1	0	1829.01	95.3	98.1	115.9	110.3	91.7	88.6	3	-125288	-76.3843	54.3611	27
AEYLASIFGTEKDK	1xAcetyl [N-Term]; 2xTMT6plex [K12; K14]; 1xTMT6plex [N-Term]	0.00161488	0.000164178	2	P0DN76	U2AF1L5	Splicing factor U2AF 35 kDa subunit-like protein OS=Homo sapiens OX=9606 GN=U2AF1L5 PE=1 SV=1	1	2301.29	95.5	92.9	104.9	101.2	107.3	98.2	2	-99576.4	-114.577	51.2311	70
AEYLGSCLLHK	1xCarbamidomethyl [C7]; 1xTMT6plex [K11]; 1xTMT6plex [N-Term]	5.42243e-06	0	1	Q9ULC5	ACSL5	Long-chain-fatty-acid--CoA ligase 5 OS=Homo sapiens OX=9606 GN=ACSL5 PE=1 SV=1	0	1748.98	95.3	107.5	94.2	105.1	100.1	97.8	3	1.44	0.00084	27.8044	44
AEYLHTWGGLLPVISK	1xTMT6plex [K16]; 1xTMT6plex [N-Term]	6.17301e-05	1.80381e-05	1	P22413	ENPP1	Ectonucleotide pyrophosphatase/phosphodiesterase family member 1 OS=Homo sapiens OX=9606 GN=ENPP1 PE=1 SV=2	0	2242.3	104.3	103.1	102.5	95.8	94.9	99.4	3	3.36	0.00251	43.6525	26
AEYINFLENLK	1xTMT6plex [K11]; 1xTMT6plex [N-Term]	3.80796e-05	0	2	Q5H9U9	DDX60L	Probable ATP-dependent RNA helicase DDX60-like OS=Homo sapiens OX=9606 GN=DDX60L PE=2 SV=2	0	1812.03	104.1	96.4	97.8	103.7	96.1	101.9	3	2.41	0.00146	48.2916	27
AEYISLAEHEAK	1xTMT6plex [K12]; 1xTMT6plex [N-Term]	0.000102219	2.77511e-05	1	Q9BZF9	UACA	Uveal autoantigen with coiled-coil domains and ankyrin repeats OS=Homo sapiens OX=9606 GN=UACA PE=1 SV=2	0	1819	99.1	95.2	100.7	100.3	99.9	104.8	3	-1.66	-0.00101	25.4822	32
AEYWAVSSLTGENVR	1xTMT6plex [N-Term]	1.68118e-06	0	2	Q9BZG1	RAB34	Ras-related protein Rab-34 OS=Homo sapiens OX=9606 GN=RAB34 PE=1 SV=1	0	1910.98	101.2	98.6	103.5	98.9	99.3	98.6	3	1.61	0.00103	36.0223	49
AFAAGADIK	1xTMT6plex [K9]; 1xTMT6plex [N-Term]	0.000146049	2.77511e-05	3	P30084	ECHS1	Enoyl-CoA hydratase, mitochondrial OS=Homo sapiens OX=9606 GN=ECHS1 PE=1 SV=4	0	1321.79	95.1	98	94.3	102.9	107.4	102.3	3	2.28	0.001	21.8551	54
AFAAQEDLEK	1xTMT6plex [K10]; 1xTMT6plex [N-Term]	9.61569e-05	2.77511e-05	1	P35241	RDX	Radixin OS=Homo sapiens OX=9606 GN=RDX PE=1 SV=1	0	1579.87	99.4	98.5	100.6	98.3	97.4	105.8	2	2.02	0.0016	23.8216	30
AFADALEVIPMALSENSGMNPIQTMTEVR	1xTMT6plex [N-Term]	4.37001e-08	0	2	P48643	CCT5	T-complex protein 1 subunit epsilon OS=Homo sapiens OX=9606 GN=CCT5 PE=1 SV=1	0	3364.68	110.7	90.2	97.3	101.4	95.2	105.1	3	9.09	0.0102	54.7912	80
AFADAMEVIPSTLAENAGLNPISTVTELR	1xTMT6plex [N-Term]	1.75555e-08	0	2	P50991	CCT4	T-complex protein 1 subunit delta OS=Homo sapiens OX=9606 GN=CCT4 PE=1 SV=4	0	3259.71	105.1	111.4	103.2	99.1	90.2	91	3	3.77	0.00409	53.9025	67
AFADAMEVIPSTLAENAGLNPISTVTELR	1xOxidation [M6]; 1xTMT6plex [N-Term]	5.38412e-06	0	1	P50991	CCT4	T-complex protein 1 subunit delta OS=Homo sapiens OX=9606 GN=CCT4 PE=1 SV=4	0	3275.7							3	3.66	0.004	45.7587	27
AFADPEVLR	1xTMT6plex [N-Term]	0.0144435	0.00122622	1	Q8IWZ3; O75179	ANKHD1; ANKRD17	Ankyrin repeat and KH domain-containing protein 1 OS=Homo sapiens OX=9606 GN=ANKHD1 PE=1 SV=1;Ankyrin repeat domain-containing protein 17 OS=Homo sapiens OX=9606 GN=ANKRD17 PE=1 SV=3	0	1246.7							2	2.22	0.00139	25.3438	13
AFAEALR	1xTMT6plex [N-Term]	0.0199164	0.00166647	1	Q9Y239	NOD1	Nucleotide-binding oligomerization domain-containing protein 1 OS=Homo sapiens OX=9606 GN=NOD1 PE=1 SV=1	0	1006.59	96.4	91.3	99	114.3	95.8	103.2	2	0.86	0.00043	19.6521	17
AFAETHIK	1xTMT6plex [K8]; 1xTMT6plex [N-Term]	0.00128025	0.000142151	2	P42704	LRPPRC	Leucine-rich PPR motif-containing protein, mitochondrial OS=Homo sapiens OX=9606 GN=LRPPRC PE=1 SV=3	0	1374.81							2	0.31	0.00022	15.3168	27
AFAFQASQDK	1xTMT6plex [K10]; 1xTMT6plex [N-Term]	3.62713e-05	0	1	Q9H000	MKRN2	Probable E3 ubiquitin-protein ligase makorin-2 OS=Homo sapiens OX=9606 GN=MKRN2 PE=1 SV=2	0	1570.86	107.7	81.3	114	107.2	90	99.8	2	0.93	0.00073	24.0886	44
AFAFVTFADDQIAQSLCGEDLIIK	1xCarbamidomethyl [C17]; 1xTMT6plex [K24]; 1xTMT6plex [N-Term]	5.69043e-09	0	3	Q13148	TARDBP	TAR DNA-binding protein 43 OS=Homo sapiens OX=9606 GN=TARDBP PE=1 SV=1	0	3130.65	92.7	102.5	91.9	105.9	103.5	103.5	3	2.2	0.00229	54.6604	88
AFAGNSK	1xTMT6plex [K7]; 1xTMT6plex [N-Term]	0.0201019	0.00166647	1	Q01780	EXOSC10	Exosome component 10 OS=Homo sapiens OX=9606 GN=EXOSC10 PE=1 SV=2	0	1152.68	104.6	102.1	105.6	95.9	97.6	94.2	2	3.86	0.00222	11.889	13
AFAGPLSPAK	1xTMT6plex [K10]; 1xTMT6plex [N-Term]	0.000811598	7.57932e-05	1	Q86XL3	ANKLE2	Ankyrin repeat and LEM domain-containing protein 2 OS=Homo sapiens OX=9606 GN=ANKLE2 PE=1 SV=4	0	1416.86							2	2.32	0.00164	24.8	17
AFALEVIK	1xTMT6plex [K8]; 1xTMT6plex [N-Term]	0.00122064	0.000132543	1	Q9H2U2	PPA2	Inorganic pyrophosphatase 2, mitochondrial OS=Homo sapiens OX=9606 GN=PPA2 PE=1 SV=2	0	1348.86	100.3	99.3	91.6	105.5	106.5	96.8	2	2.41	0.00163	35.0281	47
AFALGILK	1xTMT6plex [K8]; 1xTMT6plex [N-Term]	0.073084	0.00338512	1	Q5VZE5	NAA35	N-alpha-acetyltransferase 35, NatC auxiliary subunit OS=Homo sapiens OX=9606 GN=NAA35 PE=1 SV=1	0	1290.85							2	1.56	0.00101	38.2856	1
AFALNDLDDYEK	1xTMT6plex [K12]; 1xTMT6plex [N-Term]	7.19506e-05	2.77511e-05	1	Q14166	TTLL12	Tubulin--tyrosine ligase-like protein 12 OS=Homo sapiens OX=9606 GN=TTLL12 PE=1 SV=2	0	1871.98	103.2	105.3	100.1	96.1	96.8	98.5	3	3.81	0.00238	37.5301	31
AFAMIIDK	1xTMT6plex [K8]; 1xTMT6plex [N-Term]	0.0162494	0.0014228	1	Q15366; Q15365	PCBP2; PCBP1	Poly(rC)-binding protein 2 OS=Homo sapiens OX=9606 GN=PCBP2 PE=1 SV=1;Poly(rC)-binding protein 1 OS=Homo sapiens OX=9606 GN=PCBP1 PE=1 SV=2	0	1366.82	104.5	136.5	102.2	83.9	85.4	87.5	3	2.52	0.00115	36.5267	20
AFAMIIDKLEEDINSSMTNSTAASRPPVTLR	1xTMT6plex [K8]; 1xTMT6plex [N-Term]	1.43683e-06	0	2	Q15365	PCBP1	Poly(rC)-binding protein 1 OS=Homo sapiens OX=9606 GN=PCBP1 PE=1 SV=2	1	3837.03	107.2	114.6	110.9	87.5	98.7	81.1	5	3.55	0.00272	53.4748	33
AFAMIIDKLEEDINSSMTNSTAASRPPVTLR	1xOxidation [M17]; 1xTMT6plex [K8]; 1xTMT6plex [N-Term]	8.99568e-05	2.77511e-05	1	Q15365	PCBP1	Poly(rC)-binding protein 1 OS=Homo sapiens OX=9606 GN=PCBP1 PE=1 SV=2	1	3853.02	106.8	117.2	106.2	97.7	91.2	80.9	4	2.94	0.00283	53.5128	11
AFAMIIDKLEEDISSSMTNSTAASRPPVTLR	1xTMT6plex [K8]; 1xTMT6plex [N-Term]	6.00919e-07	0	1	Q15366	PCBP2	Poly(rC)-binding protein 2 OS=Homo sapiens OX=9606 GN=PCBP2 PE=1 SV=1	1	3810.02	119.8	129.7	106.5	84.4	84.4	75.2	4	5.27	0.00502	53.9496	26
AFAMIIDKLEEDISSSMTNSTAASRPPVTLR	1xOxidation [M17]; 1xTMT6plex [K8]; 1xTMT6plex [N-Term]	0.00024041	2.77511e-05	1	Q15366	PCBP2	Poly(rC)-binding protein 2 OS=Homo sapiens OX=9606 GN=PCBP2 PE=1 SV=1	1	3826.01	116.7	120.6	116.5	89.4	77.5	79.4	4	4.79	0.00458	53.9723	2
AFAMIIDKLEEDISSSMTNSTAASRPPVTLR	2xOxidation [M4; M17]; 1xTMT6plex [K8]; 1xTMT6plex [N-Term]	0.143015	0.0051523	1	Q15366	PCBP2	Poly(rC)-binding protein 2 OS=Homo sapiens OX=9606 GN=PCBP2 PE=1 SV=1	1	3842.01	91.2	123.5	120	97.5	77.4	90.4	4	7.61	0.00731	54.0394	1
AFANPEDALR	1xTMT6plex [N-Term]	0.000396999	3.92285e-05	1	O14684	PTGES	Prostaglandin E synthase OS=Homo sapiens OX=9606 GN=PTGES PE=1 SV=2	0	1332.71	86.2	101.8	87.7	110.3	106	108	2	2.88	0.00192	24.8428	34
AFAVGVQQVLLK	1xTMT6plex [K12]; 1xTMT6plex [N-Term]	1.14327e-06	0	3	O95373	IPO7	Importin-7 OS=Homo sapiens OX=9606 GN=IPO7 PE=1 SV=1	0	1731.09	115.8	128.8	113.3	83.3	83.3	75.5	2	2.69	0.00233	40.541	62
AFCADQLDVFLQK	1xCarbamidomethyl [C3]; 1xTMT6plex [K13]; 1xTMT6plex [N-Term]	8.18994e-05	2.77511e-05	1	Q9P2N5	RBM27	RNA-binding protein 27 OS=Homo sapiens OX=9606 GN=RBM27 PE=1 SV=2	0	2013.09	95.4	100.2	109	96.6	97.7	101.2	3	0.14	9e-05	46.2915	26
AFCAENLEEK	1xCarbamidomethyl [C3]; 1xTMT6plex [K10]; 1xTMT6plex [N-Term]	3.48792e-05	0	1	P49407	ARRB1	Beta-arrestin-1 OS=Homo sapiens OX=9606 GN=ARRB1 PE=1 SV=2	0	1668.87	102	112.9	103.1	95.5	97.2	89.3	2	1.33	0.00111	24.6794	48
AFCAGGDIR	1xCarbamidomethyl [C3]; 1xTMT6plex [N-Term]	0.0043241	0.000313812	1	Q6NVY1	HIBCH	3-hydroxyisobutyryl-CoA hydrolase, mitochondrial OS=Homo sapiens OX=9606 GN=HIBCH PE=1 SV=2	0	1195.61	99.6	93	98.8	92	101	115.6	2	2.82	0.00168	15.919	40
AFCGFEDPR	1xCarbamidomethyl [C3]; 1xTMT6plex [N-Term]	0.12245	0.00468193	1	Q15149	PLEC	Plectin OS=Homo sapiens OX=9606 GN=PLEC PE=1 SV=3	0	1327.63							2	1.61	0.00107	23.7322	20
AFCQEMLQEEPR	1xCarbamidomethyl [C3]; 1xTMT6plex [N-Term]	9.73498e-07	0	1	Q9HBH5	RDH14	Retinol dehydrogenase 14 OS=Homo sapiens OX=9606 GN=RDH14 PE=1 SV=1	0	1766.84	106.4	100.8	94.5	99.3	101.6	97.4	2	0.32	0.00028	26.2427	79
AFCTGQELQLVQLEGGGGAGTYR	1xCarbamidomethyl [C3]; 1xTMT6plex [N-Term]	3.46135e-09	0	1	Q8N3D4	EHBP1L1	EH domain-binding protein 1-like protein 1 OS=Homo sapiens OX=9606 GN=EHBP1L1 PE=1 SV=2	0	2641.32	106.7	90.7	104.8	102.4	90.1	105.4	3	2.85	0.00251	39.0508	55
AFDCPETEYPVK	1xCarbamidomethyl [C4]; 1xTMT6plex [K12]; 1xTMT6plex [N-Term]	2.30937e-06	0	1	O43847	NRDC	Nardilysin OS=Homo sapiens OX=9606 GN=NRDC PE=1 SV=3	0	1913.97	79.9	87.4	97.8	122.1	107.8	105	2	2.9	0.00277	26.8399	51
AFDDVPVVQIYSSR	1xTMT6plex [N-Term]	1.00531e-06	0	1	Q7Z460	CLASP1	CLIP-associating protein 1 OS=Homo sapiens OX=9606 GN=CLASP1 PE=1 SV=1	0	1824.97	97.2	99.3	100.3	104.4	100.4	98.4	2	1.51	0.00138	38.1298	27
AFDFLSEETEASLASR	1xTMT6plex [N-Term]	5.83838e-08	0	2	O60271	SPAG9	C-Jun-amino-terminal kinase-interacting protein 4 OS=Homo sapiens OX=9606 GN=SPAG9 PE=1 SV=4	0	2002	90.2	94.9	100.1	103.5	104.2	107.2	3	3.54	0.00236	43.723	68
AFDGAGSSLGR	1xTMT6plex [N-Term]	8.60871e-05	2.77511e-05	1	Q8WUF5	PPP1R13L	RelA-associated inhibitor OS=Homo sapiens OX=9606 GN=PPP1R13L PE=1 SV=4	0	1266.66	100.7	97.7	96.8	102.9	99.9	102	2	-1.54	-0.00097	17.2498	40
AFDLFNPNFK	1xTMT6plex [K10]; 1xTMT6plex [N-Term]	0.00496792	0.000395322	1	Q9Y3D9	MRPS23	28S ribosomal protein S23, mitochondrial OS=Homo sapiens OX=9606 GN=MRPS23 PE=1 SV=2	0	1670.93	95.9	101.3	102.6	101.2	98.1	100.9	3	5	0.00278	43.2423	19
AFDIIER	1xTMT6plex [N-Term]	0.00788767	0.000583114	1	Q8N1F7	NUP93	Nuclear pore complex protein Nup93 OS=Homo sapiens OX=9606 GN=NUP93 PE=1 SV=2	0	1092.63	106	103.1	99	97.2	99.8	94.9	2	2.99	0.00163	26.3547	38
AFDLIVDRPVTLVR	1xTMT6plex [N-Term]	0.000176167	2.77511e-05	1	O96000	NDUFB10	NADH dehydrogenase [ubiquinone] 1 beta subcomplex subunit 10 OS=Homo sapiens OX=9606 GN=NDUFB10 PE=1 SV=3	0	1843.1	102.3	98	103.8	97	95.5	103.3	3	4.06	0.00249	36.2517	7
AFDITYVR	1xTMT6plex [N-Term]	0.00237368	0.000201691	1	P11047	LAMC1	Laminin subunit gamma-1 OS=Homo sapiens OX=9606 GN=LAMC1 PE=1 SV=3	0	1213.68							2	2.37	0.00144	28.1759	12
AFDLVPPEAVPEQK	1xTMT6plex [K14]; 1xTMT6plex [N-Term]	3.65079e-05	0	2	Q96G03	PGM2	Phosphoglucomutase-2 OS=Homo sapiens OX=9606 GN=PGM2 PE=1 SV=4	0	1998.13	99.7	100.3	95.1	101	104.7	99.2	2	1.93	0.00193	36.3044	40
AFDLVPPEAVPEQKDPDPEFPTVK	2xTMT6plex [K14; K24]; 1xTMT6plex [N-Term]	0.00225579	0.000201691	1	Q96G03	PGM2	Phosphoglucomutase-2 OS=Homo sapiens OX=9606 GN=PGM2 PE=1 SV=4	1	3352.83							5	3.13	0.0021	41.3224	9
AFDQGADAIYDHINEGK	1xTMT6plex [K17]; 1xTMT6plex [N-Term]	7.28768e-08	0	1	Q9UDW1	UQCR10	Cytochrome b-c1 complex subunit 9 OS=Homo sapiens OX=9606 GN=UQCR10 PE=1 SV=3	0	2322.18	84.6	100.4	118.3	86.7	109.1	101	3	1.59	0.00123	31.5395	56
AFDSAVAK	1xTMT6plex [K8]; 1xTMT6plex [N-Term]	0.00356501	0.000252074	2	Q16891	IMMT	MICOS complex subunit MIC60 OS=Homo sapiens OX=9606 GN=IMMT PE=1 SV=1	0	1266.75	100.4	95.9	95.3	103.7	103.6	101.1	2	5.27	0.00334	18.6575	23
AFDSGIIPMEFVNK	1xTMT6plex [K14]; 1xTMT6plex [N-Term]	5.15146e-08	0	3	P53396	ACLY	ATP-citrate synthase OS=Homo sapiens OX=9606 GN=ACLY PE=1 SV=3	0	2026.11	96.3	99.9	104.9	98.2	101.2	99.4	2	1.73	0.00175	45.8527	63
AFDSGIIPMEFVNK	1xOxidation [M9]; 1xTMT6plex [K14]; 1xTMT6plex [N-Term]	0.000318757	3.92285e-05	1	P53396	ACLY	ATP-citrate synthase OS=Homo sapiens OX=9606 GN=ACLY PE=1 SV=3	0	2042.1	103.5	103.7	103.8	93.5	92.5	103	3	3.07	0.00209	40.3285	25
AFDTAGNGYCR	1xCarbamidomethyl [C10]; 1xTMT6plex [N-Term]	2.94787e-05	0	1	P49327	FASN	Fatty acid synthase OS=Homo sapiens OX=9606 GN=FASN PE=1 SV=3	0	1460.68	91.1	99.7	97.1	100	105	107.3	2	3.19	0.00233	16.0571	22
AFDTQLVER	1xTMT6plex [N-Term]	0.000261103	2.77511e-05	1	Q9BTC0	DIDO1	Death-inducer obliterator 1 OS=Homo sapiens OX=9606 GN=DIDO1 PE=1 SV=5	0	1307.72	103.7	81	109	114.2	93.1	98.9	2	-3.87	-0.00253	23.0331	18
AFEADSTVIEK	1xTMT6plex [K11]; 1xTMT6plex [N-Term]	1.18958e-05	0	1	P46939	UTRN	Utrophin OS=Homo sapiens OX=9606 GN=UTRN PE=1 SV=2	0	1667.93	91.9	98.6	95.8	102.6	107.8	103.4	2	4.22	0.00352	26.2159	32
AFEAGWGFALTK	1xTMT6plex [K12]; 1xTMT6plex [N-Term]	0.000185807	2.77511e-05	1	Q12882	DPYD	Dihydropyrimidine dehydrogenase [NADP(+)] OS=Homo sapiens OX=9606 GN=DPYD PE=1 SV=2	0	1755.98	90.8	104.9	96.6	106.8	96.3	104.7	3	1.58	0.00092	44.0189	19
AFEALLSNIVKPVASDIQAR	1xTMT6plex [K11]; 1xTMT6plex [N-Term]	5.92459e-06	0	1	Q9Y2H6	FNDC3A	Fibronectin type-III domain-containing protein 3A OS=Homo sapiens OX=9606 GN=FNDC3A PE=1 SV=4	0	2600.52	107.7	104.5	94.9	100.9	97.8	94.2	3	4.61	0.00399	51.3137	17
AFEDDDITHVEGSVDPIR	1xTMT6plex [N-Term]	1.14471e-05	0	1	Q9NTK5	OLA1	Obg-like ATPase 1 OS=Homo sapiens OX=9606 GN=OLA1 PE=1 SV=2	0	2244.1	104.2	96.8	102.1	102.9	98.3	95.7	3	3.89	0.00291	31.0851	26
AFEDDDITHVEGSVDPIRDIEIIHEELQLK	1xTMT6plex [K30]; 1xTMT6plex [N-Term]	0.0032664	0.000252074	1	Q9NTK5	OLA1	Obg-like ATPase 1 OS=Homo sapiens OX=9606 GN=OLA1 PE=1 SV=2	1	3934.05	101.9	100.6	107.3	95.6	103.3	91.3	5	1.55	0.00122	50.9912	20
AFEDEKK	2xTMT6plex [K6; K7]; 1xTMT6plex [N-Term]	0.0820412	0.00362649	1	Q9UQ80	PA2G4	Proliferation-associated protein 2G4 OS=Homo sapiens OX=9606 GN=PA2G4 PE=1 SV=3	1	1553.91	105.7	106.2	101.8	96.3	100.8	89.2	2	2.52	0.00196	13.8227	13
AFEDEMK	1xTMT6plex [K7]; 1xTMT6plex [N-Term]	0.0363684	0.00226505	1	Q9Y6E2	BZW2	Basic leucine zipper and W2 domain-containing protein 2 OS=Homo sapiens OX=9606 GN=BZW2 PE=1 SV=1	0	1327.7							2	7.37	0.00489	21.0915	9
AFEDEMKK	2xTMT6plex [K7; K8]; 1xTMT6plex [N-Term]	0.0139139	0.00116958	1	Q9Y6E2	BZW2	Basic leucine zipper and W2 domain-containing protein 2 OS=Homo sapiens OX=9606 GN=BZW2 PE=1 SV=1	1	1684.95	131.9	118	117.4	75.2	81.8	75.7	3	1.91	0.00107	19.2408	7
AFEDEMSGR	1xTMT6plex [N-Term]	0.000143978	2.77511e-05	1	Q01082	SPTBN1	Spectrin beta chain, non-erythrocytic 1 OS=Homo sapiens OX=9606 GN=SPTBN1 PE=1 SV=2	0	1270.59	93.7	94.4	103.7	101.6	105.4	101.3	2	1.85	0.00118	18.4751	44
AFEDTLQLMER	1xTMT6plex [N-Term]	9.17772e-06	0	1	O95163	ELP1	Elongator complex protein 1 OS=Homo sapiens OX=9606 GN=ELP1 PE=1 SV=3	0	1581.81	95.5	90.3	95.9	107.7	107	103.5	2	1.83	0.00145	39.603	47
AFEDWLNDDLGSYQGAQGNR	1xTMT6plex [N-Term]	8.90362e-08	0	2	Q8N6T3	ARFGAP1	ADP-ribosylation factor GTPase-activating protein 1 OS=Homo sapiens OX=9606 GN=ARFGAP1 PE=1 SV=2	0	2485.16	98	91.6	93.1	113.6	98.1	105.7	2	1.12	0.0014	45.1274	70
AFEEEKWDEISIGSLR	1xTMT6plex [K6]; 1xTMT6plex [N-Term]	8.65225e-07	0	1	Q96EN8	MOCOS	Molybdenum cofactor sulfurase OS=Homo sapiens OX=9606 GN=MOCOS PE=1 SV=2	1	2367.26	91.5	79.7	89.2	113.8	113.4	112.5	3	1.92	0.00152	38.8126	15
AFEGFNTCLFAYGQTGSGK	1xCarbamidomethyl [C8]; 1xTMT6plex [K19]; 1xTMT6plex [N-Term]	3.69526e-06	0	1	Q15058	KIF14	Kinesin-like protein KIF14 OS=Homo sapiens OX=9606 GN=KIF14 PE=1 SV=1	0	2513.25	95.8	103.3	109.2	100.9	98	92.7	3	2.89	0.00242	43.6975	43
AFEGQAHGADR	1xTMT6plex [N-Term]	1.33934e-05	0	2	P11169	SLC2A3	Solute carrier family 2, facilitated glucose transporter member 3 OS=Homo sapiens OX=9606 GN=SLC2A3 PE=1 SV=1	0	1387.69	92.4	95.6	90.2	110.9	104	107	2	1.84	0.00127	8.4041	29
AFEHSVHR	1xTMT6plex [N-Term]	0.000951031	0.000111907	1	P21589	NT5E	5'-nucleotidase OS=Homo sapiens OX=9606 GN=NT5E PE=1 SV=1	0	1211.65	95.1	90.7	91.7	111.7	106.4	104.4	2	-1.64	-0.00099	7.64	31
AFELELSWVGELTNGR	1xTMT6plex [N-Term]	5.02409e-08	0	2	P25788	PSMA3	Proteasome subunit alpha type-3 OS=Homo sapiens OX=9606 GN=PSMA3 PE=1 SV=2	0	2050.08	102.3	99.1	105	95.2	99.3	99.1	2	4.74	0.00485	53.2317	66
AFELMHSGK	1xTMT6plex [K9]; 1xTMT6plex [N-Term]	9.61569e-05	2.77511e-05	2	P11766	ADH5	Alcohol dehydrogenase class-3 OS=Homo sapiens OX=9606 GN=ADH5 PE=1 SV=4	0	1477.82	90.8	96.9	90.7	107.8	105.6	108.2	2	0.93	0.00069	20.4924	52
AFENCSEDLQER	1xCarbamidomethyl [C5]; 1xTMT6plex [N-Term]	1.79272e-06	0	1	O75828	CBR3	Carbonyl reductase [NADPH] 3 OS=Homo sapiens OX=9606 GN=CBR3 PE=1 SV=3	0	1726.79	87.4	100.2	93.5	104.5	108.8	105.6	2	1.24	0.00107	18.1698	45
AFENLLGQALTK	1xTMT6plex [K12]; 1xTMT6plex [N-Term]	2.56086e-06	0	1	Q8WWI1	LMO7	LIM domain only protein 7 OS=Homo sapiens OX=9606 GN=LMO7 PE=1 SV=3	0	1763.05	94.8	86	93.4	107.7	108.2	109.9	2	3.29	0.0029	44.8631	38
AFEPATGR	1xTMT6plex [N-Term]	0.000964463	0.000123391	1	P49189	ALDH9A1	4-trimethylaminobutyraldehyde dehydrogenase OS=Homo sapiens OX=9606 GN=ALDH9A1 PE=1 SV=3	0	1077.59	97.9	87.9	98.1	96.4	110.2	109.4	2	2.16	0.00117	12.4497	27
AFEPEARPEER	1xTMT6plex [N-Term]	0.00652001	0.000475474	1	Q8N1W1	ARHGEF28	Rho guanine nucleotide exchange factor 28 OS=Homo sapiens OX=9606 GN=ARHGEF28 PE=1 SV=3	0	1559.8	97.6	89.3	97.4	102.5	102.6	110.5	3	2.79	0.00145	11.8291	2
AFEPYLEILEVYSTK	1xTMT6plex [K15]; 1xTMT6plex [N-Term]	5.19658e-06	0	1	O95470	SGPL1	Sphingosine-1-phosphate lyase 1 OS=Homo sapiens OX=9606 GN=SGPL1 PE=1 SV=3	0	2260.25	92.6	94.6	87.7	114.7	111.3	99	3	5.58	0.0042	53.6155	51
AFEQFLGHLQAVPELR	1xTMT6plex [N-Term]	0.000151397	2.77511e-05	1	Q969T3	SNX21	Sorting nexin-21 OS=Homo sapiens OX=9606 GN=SNX21 PE=2 SV=1	0	2084.15	100	106.7	100.3	99	96	98.1	3	0.29	0.0002	43.9552	10
AFEVMDEFDGR	1xTMT6plex [N-Term]	1.11311e-05	0	2	Q9UDY2	TJP2	Tight junction protein ZO-2 OS=Homo sapiens OX=9606 GN=TJP2 PE=1 SV=2	0	1544.73	92.3	101.4	109	96.5	100.3	100.6	2	4.75	0.00367	37.2076	44
AFEVSENGNLVVSGK	1xTMT6plex [K15]; 1xTMT6plex [N-Term]	8.34336e-09	0	2	P49327	FASN	Fatty acid synthase OS=Homo sapiens OX=9606 GN=FASN PE=1 SV=3	0	2008.11	96.2	99.4	105.5	99.8	107.1	91.9	2	1.69	0.00169	31.1203	92
AFEYNMQIFNELDQAGSTLAR	1xTMT6plex [N-Term]	2.58155e-09	0	2	P30519	HMOX2	Heme oxygenase 2 OS=Homo sapiens OX=9606 GN=HMOX2 PE=1 SV=2	0	2647.3	89.4	93.9	98.7	105.1	107.5	105.4	2	2.28	0.00302	52.0471	73
AFFAGSQR	1xTMT6plex [N-Term]	0.00234957	0.000201691	1	Q14697	GANAB	Neutral alpha-glucosidase AB OS=Homo sapiens OX=9606 GN=GANAB PE=1 SV=3	0	1112.61	75.5	95.5	84.7	116.9	112.8	114.6	2	3.53	0.00196	17.6941	30
AFFDEEEDHWK	1xTMT6plex [K11]; 1xTMT6plex [N-Term]	3.88246e-05	0	1	O15066	KIF3B	Kinesin-like protein KIF3B OS=Homo sapiens OX=9606 GN=KIF3B PE=1 SV=1	0	1910.93	94.6	91.7	93.4	111.7	104.6	104.1	3	2.83	0.0018	30.6475	45
AFFESHPAPSAER	1xTMT6plex [N-Term]	2.2525e-05	0	3	P55786	NPEPPS	Puromycin-sensitive aminopeptidase OS=Homo sapiens OX=9606 GN=NPEPPS PE=1 SV=2	0	1674.84	100.5	95.9	94.9	107.8	100.4	100.5	2	4.41	0.00369	16.2398	19
AFFPCFDTPAVK	1xCarbamidomethyl [C5]; 1xTMT6plex [K12]; 1xTMT6plex [N-Term]	1.59309e-05	0	4	Q9H4A4	RNPEP	Aminopeptidase B OS=Homo sapiens OX=9606 GN=RNPEP PE=1 SV=2	0	1858	100.6	104.9	93.8	99.9	102.2	98.6	2	4.93	0.00458	41.255	46
AFFSEVER	1xTMT6plex [N-Term]	0.00163881	0.000174676	1	Q9UQ80	PA2G4	Proliferation-associated protein 2G4 OS=Homo sapiens OX=9606 GN=PA2G4 PE=1 SV=3	0	1213.64	104.8	100.5	99	92.8	101.5	101.5	2	2.57	0.00156	25.9267	34
AFGAPVPSVQWLDEDGTTVLQDER	1xTMT6plex [N-Term]	4.275e-06	0	1	P32004	L1CAM	Neural cell adhesion molecule L1 OS=Homo sapiens OX=9606 GN=L1CAM PE=1 SV=2	0	2859.44	96.8	93.6	108.4	104	91	106.2	3	6.76	0.00644	48.4277	55
AFGFMTR	1xTMT6plex [N-Term]	0.0931378	0.00406107	1	P61457	PCBD1	Pterin-4-alpha-carbinolamine dehydratase OS=Homo sapiens OX=9606 GN=PCBD1 PE=1 SV=2	0	1058.57	108.1	110.6	111.4	88.1	93.2	88.7	2	3.6	0.0019	27.015	31
AFGFSHLEALLDDSK	1xTMT6plex [K15]; 1xTMT6plex [N-Term]	3.7621e-07	0	9	Q96FW1	OTUB1	Ubiquitin thioesterase OTUB1 OS=Homo sapiens OX=9606 GN=OTUB1 PE=1 SV=2	0	2108.14	103.7	97.5	97.5	100.4	99.4	101.5	2	2.92	0.00307	44.2534	57
AFGFSHLEALLDDSKELQR	1xTMT6plex [K15]; 1xTMT6plex [N-Term]	1.24049e-05	0	1	Q96FW1	OTUB1	Ubiquitin thioesterase OTUB1 OS=Homo sapiens OX=9606 GN=OTUB1 PE=1 SV=2	1	2634.43	90.2	83.7	94.6	115.7	103	112.8	4	4.79	0.00316	42.9427	19
AFGGQSLK	1xTMT6plex [K8]; 1xTMT6plex [N-Term]	0.000781955	7.57932e-05	1	P31040	SDHA	Succinate dehydrogenase [ubiquinone] flavoprotein subunit, mitochondrial OS=Homo sapiens OX=9606 GN=SDHA PE=1 SV=2	0	1265.76	98.7	108.4	94.6	99.3	104.4	94.6	2	2.58	0.00163	19.5126	30
AFGIPIR	1xTMT6plex [N-Term]	0.0204807	0.00167179	2	P06493	CDK1	Cyclin-dependent kinase 1 OS=Homo sapiens OX=9606 GN=CDK1 PE=1 SV=3	0	1002.63	110.2	98.8	112.7	101.1	83.7	93.4	2	3.63	0.00182	26.2963	18
AFGLQPK	1xTMT6plex [K7]; 1xTMT6plex [N-Term]	0.0102558	0.000821723	1	O75923	DYSF	Dysferlin OS=Homo sapiens OX=9606 GN=DYSF PE=1 SV=1	0	1218.76	99.5	93.1	92.3	113.9	101.6	99.7	2	2.78	0.00169	21.8095	20
AFGPGLEGGLVNK	1xTMT6plex [K13]; 1xTMT6plex [N-Term]	4.02654e-07	0	4	Q14315	FLNC	Filamin-C OS=Homo sapiens OX=9606 GN=FLNC PE=1 SV=3	0	1717	104.7	98.2	99.3	91	91.5	115.3	2	4.15	0.00357	31.894	58
AFGPGLEPTGCIVDKPAEFTIDAR	1xCarbamidomethyl [C11]; 1xTMT6plex [K15]; 1xTMT6plex [N-Term]	7.94116e-07	0	2	Q14315	FLNC	Filamin-C OS=Homo sapiens OX=9606 GN=FLNC PE=1 SV=3	0	3019.6	116	106.5	109.7	91.2	86.1	90.4	3	3.57	0.00359	39.3591	42
AFGPGLQGGSAGSPAR	1xTMT6plex [N-Term]	1.09102e-08	0	2	P21333	FLNA	Filamin-A OS=Homo sapiens OX=9606 GN=FLNA PE=1 SV=4	0	1658.88	108.3	91.9	103.8	92.3	98.8	104.8	2	3.44	0.00285	18.3397	74
AFGSGYR	1xTMT6plex [N-Term]	0.0189403	0.00161716	1	P23588	EIF4B	Eukaryotic translation initiation factor 4B OS=Homo sapiens OX=9606 GN=EIF4B PE=1 SV=2	0	986.526	105.2	99.4	108	97.1	92.5	97.9	2	2.65	0.00131	13.2326	24
AFGSPFGLEEPQWVPDKECR	1xCarbamidomethyl [C19]; 1xTMT6plex [K17]; 1xTMT6plex [N-Term]	1.63211e-05	0	1	Q9BQ24	ZFYVE21	Zinc finger FYVE domain-containing protein 21 OS=Homo sapiens OX=9606 GN=ZFYVE21 PE=1 SV=1	1	2807.42	85.9	88	96.5	118.5	103.5	107.7	3	4.61	0.00431	40.2124	23
AFGVPVR	1xTMT6plex [N-Term]	0.202888	0.00672967	1	P24941	CDK2	Cyclin-dependent kinase 2 OS=Homo sapiens OX=9606 GN=CDK2 PE=1 SV=2	0	974.598	98.5	88.1	99.6	107.3	103.5	103	2	2.72	0.00133	19.0479	17
AFGYYGPLR	1xTMT6plex [N-Term]	0.00121485	0.000132543	1	P84103	SRSF3	Serine/arginine-rich splicing factor 3 OS=Homo sapiens OX=9606 GN=SRSF3 PE=1 SV=1	0	1272.69	106.9	113.5	107.2	95.2	89.4	87.8	2	1.88	0.0012	28.3176	39
AFHAALR	1xTMT6plex [N-Term]	0.0141465	0.00116958	1	Q9BPX5	ARPC5L	Actin-related protein 2/3 complex subunit 5-like protein OS=Homo sapiens OX=9606 GN=ARPC5L PE=1 SV=1	0	1014.6	96.7	96.6	91	104.1	107.5	104	2	1.43	0.00073	10.7682	29
AFHLLQK	1xTMT6plex [K7]; 1xTMT6plex [N-Term]	0.0129186	0.00107126	1	P49336	CDK8	Cyclin-dependent kinase 8 OS=Homo sapiens OX=9606 GN=CDK8 PE=1 SV=1	0	1314.83	107.9	109.1	122.3	86.2	87.8	86.6	3	1.53	0.00067	21.9522	30
AFHNEAQVNPER	1xTMT6plex [N-Term]	1.79912e-06	0	4	P17987	TCP1	T-complex protein 1 subunit alpha OS=Homo sapiens OX=9606 GN=TCP1 PE=1 SV=1	0	1640.83	96.6	103.2	105.4	100.2	98.7	95.9	2	0.4	0.00033	10.1712	60
AFHNEAQVNPERK	1xTMT6plex [K13]; 1xTMT6plex [N-Term]	0.000121436	2.77511e-05	1	P17987	TCP1	T-complex protein 1 subunit alpha OS=Homo sapiens OX=9606 GN=TCP1 PE=1 SV=1	1	1998.09	97.1	94.9	97.6	101.9	99.9	108.6	4	0.64	0.00032	11.0308	16
AFHPFIAGPYNR	1xTMT6plex [N-Term]	0.00910922	0.000668502	1	Q00341	HDLBP	Vigilin OS=Homo sapiens OX=9606 GN=HDLBP PE=1 SV=2	0	1618.87							3	8.23	0.00444	24.4827	7
AFHPTYEEK	1xTMT6plex [K9]; 1xTMT6plex [N-Term]	0.131053	0.00486124	1	Q9H3P7	ACBD3	Golgi resident protein GCP60 OS=Homo sapiens OX=9606 GN=ACBD3 PE=1 SV=4	0	1579.85							3	4.3	0.00227	14.5671	2
AFLADPSAFVAAAPVAAATTAAPAAAAAPAK	1xTMT6plex [K31]; 1xTMT6plex [N-Term]	2.78291e-09	0	5	P05388	RPLP0	60S acidic ribosomal protein P0 OS=Homo sapiens OX=9606 GN=RPLP0 PE=1 SV=1	0	3210.79	104.7	106.4	101.5	95.7	95.7	96	4	4.31	0.00346	47.9644	81
AFLAELEQNSPK	1xTMT6plex [K12]; 1xTMT6plex [N-Term]	2.8599e-06	0	3	Q9UPN3	MACF1	Microtubule-actin cross-linking factor 1, isoforms 1/2/3/5 OS=Homo sapiens OX=9606 GN=MACF1 PE=1 SV=4	0	1805.02	97.5	102.6	98.9	97.5	99.1	104.4	2	0.41	0.00037	37.2336	65
AFLDALQNQAEASSK	1xTMT6plex [K15]; 1xTMT6plex [N-Term]	3.78509e-09	0	2	Q12931	TRAP1	Heat shock protein 75 kDa, mitochondrial OS=Homo sapiens OX=9606 GN=TRAP1 PE=1 SV=3	0	2051.12	115.3	108.6	105.9	84.4	94.4	91.4	2	4.95	0.00507	38.7902	100
AFLDEDDMSLEEIK	1xTMT6plex [K14]; 1xTMT6plex [N-Term]	4.06835e-08	0	1	Q86XL3	ANKLE2	Ankyrin repeat and LEM domain-containing protein 2 OS=Homo sapiens OX=9606 GN=ANKLE2 PE=1 SV=4	0	2113.08	116.1	116	103.8	84.5	92.5	87	2	1.35	0.00143	42.3492	92
AFLDFHALPYQVVEVNPVR	1xTMT6plex [N-Term]	4.01013e-06	0	1	Q9H7Z7	PTGES2	Prostaglandin E synthase 2 OS=Homo sapiens OX=9606 GN=PTGES2 PE=1 SV=1	0	2443.33	99.6	113.4	104.6	89.8	96	96.5	3	2.02	0.00165	45.3642	23
AFLDFYHSFLEK	1xTMT6plex [K12]; 1xTMT6plex [N-Term]	0.000693102	7.57932e-05	1	Q92888	ARHGEF1	Rho guanine nucleotide exchange factor 1 OS=Homo sapiens OX=9606 GN=ARHGEF1 PE=1 SV=2	0	1975.07	109.8	136.5	118.4	81.5	80.8	73	3	4.18	0.00275	49.5482	23
AFLDGFNEVAPLEWLR	1xTMT6plex [N-Term]	4.90147e-07	0	1	O00308	WWP2	NEDD4-like E3 ubiquitin-protein ligase WWP2 OS=Homo sapiens OX=9606 GN=WWP2 PE=1 SV=2	0	2106.12	84.2	93	122.1	99.2	100.3	101.1	2	7.99	0.00841	53.6328	64
AFLDNPGILSELCGTLSR	1xCarbamidomethyl [C13]; 1xTMT6plex [N-Term]	5.75181e-09	0	3	Q6NXE6	ARMC6	Armadillo repeat-containing protein 6 OS=Homo sapiens OX=9606 GN=ARMC6 PE=1 SV=2	0	2192.16	117.4	106.6	113	87.2	83.9	91.9	2	3.56	0.0039	51.2345	87
AFLDRPSQPTQETK	1xTMT6plex [K14]; 1xTMT6plex [N-Term]	5.2907e-05	1.80381e-05	1	Q9H3M7	TXNIP	Thioredoxin-interacting protein OS=Homo sapiens OX=9606 GN=TXNIP PE=1 SV=1	0	2076.15	112.2	112	108.9	87	92.1	87.7	3	6.2	0.00429	17.2039	11
AFLDSLPDVK	1xTMT6plex [K10]; 1xTMT6plex [N-Term]	0.000205561	2.77511e-05	1	O15294	OGT	UDP-N-acetylglucosamine--peptide N-acetylglucosaminyltransferase 110 kDa subunit OS=Homo sapiens OX=9606 GN=OGT PE=1 SV=3	0	1562.92							2	3.01	0.00235	38.2381	33
AFIDVTAAAENIR	1xTMT6plex [N-Term]	3.19155e-07	0	2	P23229	ITGA6	Integrin alpha-6 OS=Homo sapiens OX=9606 GN=ITGA6 PE=1 SV=5	0	1619.9	93.3	94.4	92.3	112.6	103.5	103.9	3	2.93	0.00158	36.6741	72
AFLEENNLDYIIR	1xTMT6plex [N-Term]	5.73634e-07	0	3	P53041	PPP5C	Serine/threonine-protein phosphatase 5 OS=Homo sapiens OX=9606 GN=PPP5C PE=1 SV=1	0	1838.98	100.2	102.3	103.3	98.3	100.3	95.6	3	1.78	0.00109	42.2401	63
AFLEILHTYQK	1xTMT6plex [K11]; 1xTMT6plex [N-Term]	0.000195368	2.77511e-05	1	Q96ST3	SIN3A	Paired amphipathic helix protein Sin3a OS=Homo sapiens OX=9606 GN=SIN3A PE=1 SV=2	0	1821.07	118.5	124.4	109.1	84.5	84.3	79.2	3	3.35	0.00203	37.943	44
AFLEPLGLAYTGPDNSSIDCR	1xCarbamidomethyl [C20]; 1xTMT6plex [N-Term]	6.90704e-08	0	1	Q96PV6	LENG8	Leukocyte receptor cluster member 8 OS=Homo sapiens OX=9606 GN=LENG8 PE=1 SV=3	0	2525.25	89.7	101	100.5	96.9	97.2	114.7	3	4.21	0.00354	45.3288	70
AFLFDVVSK	1xTMT6plex [K9]; 1xTMT6plex [N-Term]	0.00605025	0.000424802	1	Q9HB90	RRAGC	Ras-related GTP-binding protein C OS=Homo sapiens OX=9606 GN=RRAGC PE=1 SV=1	0	1483.89	92.3	91.5	101	105.4	111.4	98.5	3	4.43	0.00219	42.4619	34
AFIGFEGVK	1xTMT6plex [K9]; 1xTMT6plex [N-Term]	0.000113924	2.77511e-05	1	P15924	DSP	Desmoplakin OS=Homo sapiens OX=9606 GN=DSP PE=1 SV=3	0	1425.85	102.3	92.7	106.3	103.9	93.6	101.1	2	3.53	0.00252	33.9719	42
AFIHWVSQPLMCEVR	1xCarbamidomethyl [C12]; 1xTMT6plex [N-Term]	0.00164687	0.000174676	1	P47897	QARS	Glutamine--tRNA ligase OS=Homo sapiens OX=9606 GN=QARS PE=1 SV=1	0	2102.09							3	1.25	0.00087	38.7429	6
AFLIEEQK	1xTMT6plex [K8]; 1xTMT6plex [N-Term]	0.00112085	0.000132543	2	P49207	RPL34	60S ribosomal protein L34 OS=Homo sapiens OX=9606 GN=RPL34 PE=1 SV=3	0	1435.86	107.2	104.1	98.2	95	103.1	92.5	2	2.24	0.00161	27.7102	43
AFLIEPEHVNTVGYGK	1xTMT6plex [K16]; 1xTMT6plex [N-Term]	0.0001194	2.77511e-05	1	Q96JH7	VCPIP1	Deubiquitinating protein VCIP135 OS=Homo sapiens OX=9606 GN=VCPIP1 PE=1 SV=2	0	2232.24	95.3	99	101.2	101.5	103.4	99.6	3	3.97	0.00296	30.6602	25
AFLLESLLK	1xTMT6plex [K9]; 1xTMT6plex [N-Term]	0.00010805	2.77511e-05	2	Q96JM3	CHAMP1	Chromosome alignment-maintaining phosphoprotein 1 OS=Homo sapiens OX=9606 GN=CHAMP1 PE=1 SV=2	0	1491.96	109.4	104.3	110.2	92.5	91	92.6	2	3.31	0.00247	50.6922	42
AFLLMASQYQQPHENDVAALLKPISEK	2xTMT6plex [K22; K27]; 1xTMT6plex [N-Term]	2.66323e-06	0	1	P40123	CAP2	Adenylyl cyclase-associated protein 2 OS=Homo sapiens OX=9606 GN=CAP2 PE=1 SV=1	0	3729.07	101.8	91.9	100.9	99.3	113.2	92.9	4	4.67	0.00435	46.6017	18
AFIITGQTYTR	1xTMT6plex [N-Term]	8.18994e-05	2.77511e-05	2	P30566	ADSL	Adenylosuccinate lyase OS=Homo sapiens OX=9606 GN=ADSL PE=1 SV=2	0	1499.84	98.3	103.7	91.7	94.8	113.1	98.4	2	3.11	0.00233	27.1229	24
AFIITINSFGTELSK	1xTMT6plex [K15]; 1xTMT6plex [N-Term]	6.32637e-05	2.77511e-05	2	P61421	ATP6V0D1	V-type proton ATPase subunit d 1 OS=Homo sapiens OX=9606 GN=ATP6V0D1 PE=1 SV=1	0	2099.22	99.2	102.1	104.4	93.7	90.3	110.3	3	4.41	0.00309	49.8741	26
AFLLTPR	1xTMT6plex [N-Term]	0.0233385	0.00180127	1	O95445	APOM	Apolipoprotein M OS=Homo sapiens OX=9606 GN=APOM PE=1 SV=2	0	1046.66	102.1	106.2	97.7	102.1	100	91.9	2	3.1	0.00162	26.2191	17
AFLNAIMR	1xTMT6plex [N-Term]	0.0032496	0.000252074	1	Q14839	CHD4	Chromodomain-helicase-DNA-binding protein 4 OS=Homo sapiens OX=9606 GN=CHD4 PE=1 SV=2	0	1164.68	108.6	117.8	105.3	81.8	82.3	104.2	2	1.26	0.00074	35.5867	28
AFINLEAAGVGGK	1xTMT6plex [K13]; 1xTMT6plex [N-Term]	5.92388e-07	0	1	Q7Z2K6	ERMP1	Endoplasmic reticulum metallopeptidase 1 OS=Homo sapiens OX=9606 GN=ERMP1 PE=1 SV=2	0	1705	97.3	110.1	98.6	103.5	97.9	92.6	2	4.47	0.00381	34.5464	65
AFIPAIDSFGFETDLR	1xTMT6plex [N-Term]	4.52496e-06	0	1	Q15029	EFTUD2	116 kDa U5 small nuclear ribonucleoprotein component OS=Homo sapiens OX=9606 GN=EFTUD2 PE=1 SV=1	0	2028.06	98.1	101	104.4	102.6	92	101.9	3	6.46	0.00437	51.6172	58
AFLPLLK	1xTMT6plex [K7]; 1xTMT6plex [N-Term]	0.0166723	0.00144937	1	Q14690	PDCD11	Protein RRP5 homolog OS=Homo sapiens OX=9606 GN=PDCD11 PE=1 SV=3	0	1259.85	124.7	101.2	116	95	79.5	83.6	2	2.44	0.00153	40.5383	21
AFLQGGQEATDIALLLR	1xTMT6plex [N-Term]	1.39639e-08	0	2	Q14203	DCTN1	Dynactin subunit 1 OS=Homo sapiens OX=9606 GN=DCTN1 PE=1 SV=3	0	2045.16	101.7	96.9	101.6	100.9	98.9	100	2	4.04	0.00414	50.0661	82
AFIQQCIR	1xCarbamidomethyl [C6]; 1xTMT6plex [N-Term]	0.0347922	0.00219434	1	O14777	NDC80	Kinetochore protein NDC80 homolog OS=Homo sapiens OX=9606 GN=NDC80 PE=1 SV=1	0	1264.7	103	98.4	103.5	98.7	97.2	99.3	2	5.17	0.00327	20.3496	24
AFLTLAEDILR	1xTMT6plex [N-Term]	1.68362e-05	0	3	P61026	RAB10	Ras-related protein Rab-10 OS=Homo sapiens OX=9606 GN=RAB10 PE=1 SV=1	0	1490.88	18.6	20.6	28.1	212.9	15.8	304	2	4.74	0.00353	53.4217	59
AFITNIPFDVK	1xTMT6plex [K11]; 1xTMT6plex [N-Term]	5.71843e-06	0	4	P52272	HNRNPM	Heterogeneous nuclear ribonucleoprotein M OS=Homo sapiens OX=9606 GN=HNRNPM PE=1 SV=3	0	1723.02	114.2	132.6	115.3	81.4	83.4	73.1	2	4.88	0.00421	43.1922	53
AFITSTR	1xTMT6plex [N-Term]	0.0200088	0.00166647	1	O43752	STX6	Syntaxin-6 OS=Homo sapiens OX=9606 GN=STX6 PE=1 SV=1	0	1024.6	95.3	92.9	100.7	97.4	99.5	114.2	2	2.21	0.00113	14.6275	17
AFIVELR	1xTMT6plex [N-Term]	0.165172	0.00568371	1	O43318	MAP3K7	Mitogen-activated protein kinase kinase kinase 7 OS=Homo sapiens OX=9606 GN=MAP3K7 PE=1 SV=1	0	1076.67	98.6	100.7	99.7	99.7	102.4	98.9	2	2.95	0.00159	30.2665	19
AFIVTDEDIR	1xTMT6plex [N-Term]	0.00018796	2.77511e-05	1	Q9UBB5	MBD2	Methyl-CpG-binding domain protein 2 OS=Homo sapiens OX=9606 GN=MBD2 PE=1 SV=1	0	1407.77	102.2	95.7	106.1	95.8	96.8	103.5	2	3.64	0.00257	28.2854	51
AFMAVCIETAK	1xCarbamidomethyl [C6]; 1xTMT6plex [K11]; 1xTMT6plex [N-Term]	0.000739568	7.57932e-05	1	Q5T4S7	UBR4	E3 ubiquitin-protein ligase UBR4 OS=Homo sapiens OX=9606 GN=UBR4 PE=1 SV=1	0	1698.93	92.9	93.9	103.5	109.9	99.7	100.2	3	3.8	0.00215	33.4391	33
AFMGPLK	1xTMT6plex [K7]; 1xTMT6plex [N-Term]	0.0114221	0.00097346	1	P39023	RPL3	60S ribosomal protein L3 OS=Homo sapiens OX=9606 GN=RPL3 PE=1 SV=2	0	1221.74	108.6	117.2	108.1	88.6	91.1	86.3	2	2.59	0.00158	27.5418	22
AFMGTPVQK	1xTMT6plex [K9]; 1xTMT6plex [N-Term]	0.000198435	2.77511e-05	1	P46013	MKI67	Proliferation marker protein Ki-67 OS=Homo sapiens OX=9606 GN=MKI67 PE=1 SV=2	0	1436.83	105.1	98.6	103.8	94.9	95.5	102.1	2	1.76	0.00126	22.8474	39
AFMTADLPNELIELLEK	1xTMT6plex [K17]; 1xTMT6plex [N-Term]	8.82739e-05	2.77511e-05	2	Q00610	CLTC	Clathrin heavy chain 1 OS=Homo sapiens OX=9606 GN=CLTC PE=1 SV=5	0	2405.34	92.2	100.7	79.3	108.1	107.3	112.4	4	4.48	0.00269	55.0223	42
AFMTADLPNELIELLEK	1xOxidation [M3]; 1xTMT6plex [K17]; 1xTMT6plex [N-Term]	2.0129e-05	0	5	Q00610	CLTC	Clathrin heavy chain 1 OS=Homo sapiens OX=9606 GN=CLTC PE=1 SV=5	0	2421.34	105.1	104.9	94.9	97	97.2	100.8	2	6.31	0.00763	55.0185	59
AFMVTDEDIR	1xTMT6plex [N-Term]	0.000584234	5.20452e-05	1	O95983	MBD3	Methyl-CpG-binding domain protein 3 OS=Homo sapiens OX=9606 GN=MBD3 PE=1 SV=1	0	1425.72	102.6	103.2	111.5	95.6	94	93.2	2	2.31	0.00165	27.5199	20
AFNADFH	1xTMT6plex [N-Term]	0.120687	0.00467399	1	P26440	IVD	Isovaleryl-CoA dehydrogenase, mitochondrial OS=Homo sapiens OX=9606 GN=IVD PE=1 SV=2	0	1050.52							2	4.13	0.00217	20.2513	35
AFNDPFIQK	1xTMT6plex [K9]; 1xTMT6plex [N-Term]	0.000181595	2.77511e-05	4	Q92598	HSPH1	Heat shock protein 105 kDa OS=Homo sapiens OX=9606 GN=HSPH1 PE=1 SV=1	0	1537.88	101.6	103.7	124	82.8	92.6	95.3	2	2.44	0.00188	32.4877	34
AFNEFLER	1xTMT6plex [N-Term]	0.00349252	0.000252074	1	Q03169	TNFAIP2	Tumor necrosis factor alpha-induced protein 2 OS=Homo sapiens OX=9606 GN=TNFAIP2 PE=2 SV=2	0	1254.67	91	101.5	92.5	104.5	104.8	105.7	2	2.35	0.00147	29.7736	13
AFNFGNGLQMLGQKPK	2xTMT6plex [K14; K16]; 1xTMT6plex [N-Term]	0.000161085	2.77511e-05	1	O95573	ACSL3	Long-chain-fatty-acid--CoA ligase 3 OS=Homo sapiens OX=9606 GN=ACSL3 PE=1 SV=3	0	2437.4	105.9	110.5	108.6	90.1	91.3	93.6	4	3.92	0.00239	37.6919	15
AFNFLNEIK	1xTMT6plex [K9]; 1xTMT6plex [N-Term]	0.000117801	2.77511e-05	1	P51809	VAMP7	Vesicle-associated membrane protein 7 OS=Homo sapiens OX=9606 GN=VAMP7 PE=1 SV=3	0	1553.91	92.5	92.8	101.3	112.9	101.5	99.1	2	3.64	0.00283	42.0273	48
AFNKGEK	2xTMT6plex [K4; K7]; 1xTMT6plex [N-Term]	0.138244	0.00506663	1	P05556	ITGB1	Integrin beta-1 OS=Homo sapiens OX=9606 GN=ITGB1 PE=1 SV=2	1	1480.91	96.1	102.2	88.7	105.3	104.8	102.9	2	1.67	0.00124	11.8897	19
AFNSETDSFK	1xTMT6plex [K10]; 1xTMT6plex [N-Term]	0.00010805	2.77511e-05	1	Q9UMZ2	SYNRG	Synergin gamma OS=Homo sapiens OX=9606 GN=SYNRG PE=1 SV=2	0	1603.84	97.4	100.4	98.9	95.7	99.5	108.1	2	6.72	0.00539	23.2716	7
AFNSNYEQR	1xTMT6plex [N-Term]	0.0037908	0.000283562	1	Q9Y6D5	ARFGEF2	Brefeldin A-inhibited guanine nucleotide-exchange protein 2 OS=Homo sapiens OX=9606 GN=ARFGEF2 PE=1 SV=3	0	1357.67							2	0.85	0.00058	13.2109	7
AFNSSSFNSNTFLTR	1xTMT6plex [N-Term]	1.47334e-08	0	2	P46060	RANGAP1	Ran GTPase-activating protein 1 OS=Homo sapiens OX=9606 GN=RANGAP1 PE=1 SV=1	0	1921.96	105.9	107.1	106.7	91.4	92.1	96.8	2	2.32	0.00223	32.9933	70
AFPAFLQTVSLEDFLK	1xTMT6plex [K16]; 1xTMT6plex [N-Term]	7.0639e-05	2.77511e-05	1	Q330K2	NDUFAF6	NADH dehydrogenase (ubiquinone) complex I, assembly factor 6 OS=Homo sapiens OX=9606 GN=NDUFAF6 PE=1 SV=2	0	2284.3	105.3	112.9	117.6	89.8	80.2	94.2	3	4.39	0.00334	54.2594	30
AFPAQTASGFK	1xTMT6plex [K11]; 1xTMT6plex [N-Term]	6.92233e-06	0	1	Q9UQB8	BAIAP2	Brain-specific angiogenesis inhibitor 1-associated protein 2 OS=Homo sapiens OX=9606 GN=BAIAP2 PE=1 SV=1	0	1582.9	97.9	96.4	99.8	99.8	102.2	103.8	2	2.15	0.0017	24.6632	50
AFPAWADTSVLSR	1xTMT6plex [N-Term]	4.46642e-07	0	2	Q02252	ALDH6A1	Methylmalonate-semialdehyde dehydrogenase [acylating], mitochondrial OS=Homo sapiens OX=9606 GN=ALDH6A1 PE=1 SV=2	0	1649.88	101.9	111.7	96.7	94	98.3	97.4	2	4.26	0.00351	38.4554	44
AFPCWDEPAIK	1xCarbamidomethyl [C4]; 1xTMT6plex [K11]; 1xTMT6plex [N-Term]	7.88815e-06	0	2	P55786	NPEPPS	Puromycin-sensitive aminopeptidase OS=Homo sapiens OX=9606 GN=NPEPPS PE=1 SV=2	0	1791.95	88	101.4	89.9	107.9	109.9	102.9	2	2.77	0.00249	36.0094	49
AFPDSPGLNR	1xTMT6plex [N-Term]	0.00664172	0.000505076	2	P35270	SPR	Sepiapterin reductase OS=Homo sapiens OX=9606 GN=SPR PE=1 SV=1	0	1302.7	97.3	97.1	97.6	103.5	102	102.5	2	3.09	0.00201	19.8228	32
AFPEQALLR	1xTMT6plex [N-Term]	0.010213	0.000803234	1	Q8IYB7	DIS3L2	DIS3-like exonuclease 2 OS=Homo sapiens OX=9606 GN=DIS3L2 PE=1 SV=4	0	1273.75							2	0.32	0.0002	28.3821	9
AFPGPLAK	1xTMT6plex [K8]; 1xTMT6plex [N-Term]	0.103002	0.00433663	1	O15027	SEC16A	Protein transport protein Sec16A OS=Homo sapiens OX=9606 GN=SEC16A PE=1 SV=4	0	1258.79	100	93.9	98.3	102.8	99.1	105.9	2	1.88	0.00118	26.1316	10
AFPMPGFDEH	1xTMT6plex [N-Term]	3.42011e-05	0	2	P34897	SHMT2	Serine hydroxymethyltransferase, mitochondrial OS=Homo sapiens OX=9606 GN=SHMT2 PE=1 SV=3	0	1376.65	100.4	92.8	94.8	105.5	103.4	103.1	2	2.51	0.00173	34.6273	56
AFPVLLLDTVPWYLR	1xTMT6plex [N-Term]	8.59064e-07	0	1	Q969N2	PIGT	GPI transamidase component PIG-T OS=Homo sapiens OX=9606 GN=PIGT PE=1 SV=1	0	2032.18	106.6	123.1	105.5	86.2	88.1	90.5	2	2.58	0.00262	54.8291	48
AFQAHKEENWALPVMYAVALDLR	1xTMT6plex [K6]; 1xTMT6plex [N-Term]	0.0147477	0.00125279	1	Q5JVF3	PCID2	PCI domain-containing protein 2 OS=Homo sapiens OX=9606 GN=PCID2 PE=1 SV=2	1	3130.69	88.1	99.7	94.4	109.2	100.8	107.9	4	-9.17	-0.00718	48.9584	1
AFQAVQNLPTK	1xTMT6plex [K11]; 1xTMT6plex [N-Term]	2.60478e-05	0	2	Q8N392	ARHGAP18	Rho GTPase-activating protein 18 OS=Homo sapiens OX=9606 GN=ARHGAP18 PE=1 SV=3	0	1674.99	100.5	103.3	103.9	91.9	100.6	99.8	2	4.08	0.00342	27.0374	57
AFQAWQK	1xTMT6plex [K7]; 1xTMT6plex [N-Term]	0.0150593	0.00127924	1	Q9H6S0	YTHDC2	3'-5' RNA helicase YTHDC2 OS=Homo sapiens OX=9606 GN=YTHDC2 PE=1 SV=2	0	1336.78							2	3	0.002	24.8161	15
AFQIMQEELR	1xTMT6plex [N-Term]	4.27401e-05	1.80381e-05	1	Q14789	GOLGB1	Golgin subfamily B member 1 OS=Homo sapiens OX=9606 GN=GOLGB1 PE=1 SV=2	0	1493.8	98.8	92.9	99	110	97.1	102.3	2	3.45	0.00257	34.6473	45
AFQNTATACAPVSHYR	1xCarbamidomethyl [C9]; 1xTMT6plex [N-Term]	2.25244e-06	0	1	Q9H814	PHAX	Phosphorylated adapter RNA export protein OS=Homo sapiens OX=9606 GN=PHAX PE=1 SV=1	0	2023	101.3	92.4	101.9	101.7	96.8	105.9	3	0.2	0.00013	15.1404	48
AFQSLLTEVNK	1xTMT6plex [K11]; 1xTMT6plex [N-Term]	7.09566e-06	0	2	P50453	SERPINB9	Serpin B9 OS=Homo sapiens OX=9606 GN=SERPINB9 PE=1 SV=1	0	1708	93.2	98.5	85.8	114.8	107.7	99.9	2	1.94	0.00166	38.4449	68
AFQVLYR	1xTMT6plex [N-Term]	0.031855	0.00214298	1	P22670	RFX1	MHC class II regulatory factor RFX1 OS=Homo sapiens OX=9606 GN=RFX1 PE=1 SV=2	0	1125.66	111.4	106.2	106.3	88.7	91.2	96.1	2	2.92	0.00165	25.9958	1
AFQYADGLEQLR	1xTMT6plex [N-Term]	1.6397e-06	0	1	Q9BU89	DOHH	Deoxyhypusine hydroxylase OS=Homo sapiens OX=9606 GN=DOHH PE=1 SV=1	0	1639.86	95.7	102.8	113.4	90.2	98.4	99.5	2	3.16	0.00259	33.1489	51
AFQYVETHGEVCPANWTPDSPTIKPSPAASK	1xCarbamidomethyl [C12]; 2xTMT6plex [K24; K31]; 1xTMT6plex [N-Term]	8.79747e-10	0	6	P30048	PRDX3	Thioredoxin-dependent peroxide reductase, mitochondrial OS=Homo sapiens OX=9606 GN=PRDX3 PE=1 SV=3	0	4073.1	100.2	104.2	93.7	102.1	100.9	99	4	0.74	0.00075	32.3306	59
AFREEAIK	1xTMT6plex [K8]; 1xTMT6plex [N-Term]	0.0102558	0.000821723	3	P13010	XRCC5	X-ray repair cross-complementing protein 5 OS=Homo sapiens OX=9606 GN=XRCC5 PE=1 SV=3	1	1421.85	100.6	102.3	98.9	96.5	99.6	102.1	2	0.47	0.00034	14.8813	16
AFREEFGAEPELAVSAPGR	1xTMT6plex [N-Term]	8.11327e-07	0	1	P51570	GALK1	Galactokinase OS=Homo sapiens OX=9606 GN=GALK1 PE=1 SV=1	1	2262.17	98.7	97.3	98.2	98.5	102.8	104.5	3	2.16	0.00163	29.1142	24
AFSAVDTDGNGTINAQELGAALK	1xTMT6plex [K23]; 1xTMT6plex [N-Term]	1.21918e-06	0	1	Q9NZT1	CALML5	Calmodulin-like protein 5 OS=Homo sapiens OX=9606 GN=CALML5 PE=1 SV=2	0	2721.45	163.6	79.1	79.1	87	85.7	105.6	3	-0.85	-0.00077	41.1068	54
AFSDLTSR	1xAcetyl [N-Term]; 1xTMT6plex [N-Term]	0.0110975	0.00089687	1	A1L3X0	ELOVL7	Elongation of very long chain fatty acids protein 7 OS=Homo sapiens OX=9606 GN=ELOVL7 PE=1 SV=1	0	1167.62							2	-196261	-114.579	27.2215	25
AFSDPFVEAEK	1xTMT6plex [K11]; 1xTMT6plex [N-Term]	6.89791e-06	0	4	P34932	HSPA4	Heat shock 70 kDa protein 4 OS=Homo sapiens OX=9606 GN=HSPA4 PE=1 SV=4	0	1697.92	102.3	103.3	108.3	89.7	100.1	96.3	2	1.45	0.00123	34.094	54
AFSEADMERPLQELGLVPSAVLIVAK	1xTMT6plex [K26]; 1xTMT6plex [N-Term]	1.51699e-07	0	2	Q04323	UBXN1	UBX domain-containing protein 1 OS=Homo sapiens OX=9606 GN=UBXN1 PE=1 SV=2	0	3241.83	102.5	93.8	95.4	106.2	106.9	95.2	3	3.38	0.00365	52.6044	30
AFSGSGNR	1xTMT6plex [N-Term]	0.0201956	0.00167179	1	Q92890	UFD1	Ubiquitin recognition factor in ER-associated degradation protein 1 OS=Homo sapiens OX=9606 GN=UFD1 PE=1 SV=3	0	1024.54							2	1.51	0.00077	8.8441	15
AFSGYLGTDQSK	1xTMT6plex [K12]; 1xTMT6plex [N-Term]	1.80556e-06	0	2	P10768	ESD	S-formylglutathione hydrolase OS=Homo sapiens OX=9606 GN=ESD PE=1 SV=2	0	1731.93	98.8	103.4	97.4	102.4	101.8	96.2	3	3.5	0.00202	26.7096	45
AFSIAQDALHIPR	1xTMT6plex [N-Term]	1.67782e-05	0	1	Q96JQ2	CLMN	Calmin OS=Homo sapiens OX=9606 GN=CLMN PE=1 SV=1	0	1667.94	97.6	100.3	106	101.2	88.8	106.1	3	1.63	0.00091	32.8288	38
AFSIDIIR	1xTMT6plex [N-Term]	0.000858241	8.78677e-05	1	Q9UPN3	MACF1	Microtubule-actin cross-linking factor 1, isoforms 1/2/3/5 OS=Homo sapiens OX=9606 GN=MACF1 PE=1 SV=4	0	1163.7	104.1	105.1	102.1	98.7	95.8	94.2	2	2.48	0.00144	34.3752	38
AFSIQTPEQYYFCYK	1xCarbamidomethyl [C13]; 1xTMT6plex [K15]; 1xTMT6plex [N-Term]	0.000746465	7.57932e-05	1	P43378	PTPN9	Tyrosine-protein phosphatase non-receptor type 9 OS=Homo sapiens OX=9606 GN=PTPN9 PE=1 SV=1	0	2403.21	95.7	89.3	104.6	101.2	99	110.2	3	2.79	0.00223	44.1239	31
AFSITQGLLK	1xTMT6plex [K10]; 1xTMT6plex [N-Term]	3.42011e-05	0	3	O15067	PFAS	Phosphoribosylformylglycinamidine synthase OS=Homo sapiens OX=9606 GN=PFAS PE=1 SV=4	0	1535.96	112	110.9	107.8	88.6	85.8	94.9	3	3.15	0.00161	37.503	50
AFSPTTVNTGR	1xTMT6plex [N-Term]	0.000314657	3.92285e-05	1	P61619	SEC61A1	Protein transport protein Sec61 subunit alpha isoform 1 OS=Homo sapiens OX=9606 GN=SEC61A1 PE=1 SV=2	0	1379.75	101.1	100.4	94.9	103.7	103	97	2	2.16	0.00149	16.2977	32
AFSQFGK	1xTMT6plex [K7]; 1xTMT6plex [N-Term]	0.0100012	0.000784708	1	O60506	SYNCRIP	Heterogeneous nuclear ribonucleoprotein Q OS=Homo sapiens OX=9606 GN=SYNCRIP PE=1 SV=2	0	1242.72							2	2.73	0.0017	23.4534	23
AFSSPQEEEEAGFTGR	1xTMT6plex [N-Term]	1.86559e-08	0	1	Q14241	ELOA	Elongin-A OS=Homo sapiens OX=9606 GN=ELOA PE=1 SV=2	0	1970.93	94.3	87.2	98.3	102.3	106.6	111.2	2	3	0.00296	23.7485	56
AFSVNIFK	1xTMT6plex [K8]; 1xTMT6plex [N-Term]	0.0044116	0.000313812	1	P11279	LAMP1	Lysosome-associated membrane glycoprotein 1 OS=Homo sapiens OX=9606 GN=LAMP1 PE=1 SV=3	0	1383.84							2	6.68	0.00462	37.3665	1
AFSYYGPLR	1xTMT6plex [N-Term]	0.00144381	0.000142151	3	Q16629	SRSF7	Serine/arginine-rich splicing factor 7 OS=Homo sapiens OX=9606 GN=SRSF7 PE=1 SV=1	0	1302.7	109.8	108.9	110.4	87.1	95.6	88.2	2	1.78	0.00116	28.2313	23
AFTEANDGSLCLAMEYGGEK	1xCarbamidomethyl [C11]; 1xTMT6plex [K20]; 1xTMT6plex [N-Term]	1.0875e-06	0	1	Q96KB5	PBK	Lymphokine-activated killer T-cell-originated protein kinase OS=Homo sapiens OX=9606 GN=PBK PE=1 SV=3	0	2621.26	95.4	100	98.7	102.2	105.5	98.3	3	0.36	0.00032	39.4699	41
AFTELFQVACAKPPPLGLCDYPSSR	2xCarbamidomethyl [C10; C19]; 1xTMT6plex [K12]; 1xTMT6plex [N-Term]	0.000355424	3.92285e-05	1	Q14166	TTLL12	Tubulin--tyrosine ligase-like protein 12 OS=Homo sapiens OX=9606 GN=TTLL12 PE=1 SV=2	0	3282.71							4	1.69	0.00138	48.2353	2
AFTELQAK	1xTMT6plex [K8]; 1xTMT6plex [N-Term]	0.000978094	0.000123391	1	O60925	PFDN1	Prefoldin subunit 1 OS=Homo sapiens OX=9606 GN=PFDN1 PE=1 SV=2	0	1365.81	98.4	99.9	102.7	99.9	102.5	96.6	2	3.42	0.00234	23.5368	41
AFTFDDEDDELSQLK	1xTMT6plex [K15]; 1xTMT6plex [N-Term]	1.73668e-05	0	1	Q9H9C1	VIPAS39	Spermatogenesis-defective protein 39 homolog OS=Homo sapiens OX=9606 GN=VIPAS39 PE=1 SV=1	0	2231.11	95.6	97.4	103.6	102	102.6	98.8	2	2.9	0.00324	42.2211	49
AFTGEGQK	1xTMT6plex [K8]; 1xTMT6plex [N-Term]	0.00143684	0.000142151	1	Q9UNZ2	NSFL1C	NSFL1 cofactor p47 OS=Homo sapiens OX=9606 GN=NSFL1C PE=1 SV=2	0	1295.74	95.9	101.5	102.9	97.6	100.7	101.5	2	2.38	0.00154	13.8473	24
AFTGFIVEADTPGIQIGR	1xTMT6plex [N-Term]	4.49685e-08	0	1	P11310	ACADM	Medium-chain specific acyl-CoA dehydrogenase, mitochondrial OS=Homo sapiens OX=9606 GN=ACADM PE=1 SV=1	0	2121.15	97.1	92.1	95.9	104.4	104.2	106.3	2	2.84	0.00302	44.8055	53
AFTHTAQYDEAISDYFR	1xTMT6plex [N-Term]	1.81297e-08	0	4	P31939	ATIC	Bifunctional purine biosynthesis protein PURH OS=Homo sapiens OX=9606 GN=ATIC PE=1 SV=3	0	2264.08	100.4	97.1	98.7	103	100.4	100.5	2	5.48	0.0062	34.7842	79
AFTKPEEACSFILSADFPALVVK	1xCarbamidomethyl [C9]; 2xTMT6plex [K4; K23]; 1xTMT6plex [N-Term]	2.14483e-08	0	3	P22102	GART	Trifunctional purine biosynthetic protein adenosine-3 OS=Homo sapiens OX=9606 GN=GART PE=1 SV=1	0	3227.8	110.5	113.3	104.2	88	95.5	88.5	3	8.39	0.00902	50.8434	64
AFTMDCITLEGDQVSHR	1xCarbamidomethyl [C6]; 1xTMT6plex [N-Term]	5.67806e-06	0	1	Q9UQE7	SMC3	Structural maintenance of chromosomes protein 3 OS=Homo sapiens OX=9606 GN=SMC3 PE=1 SV=2	0	2209.06	97.7	95.7	96.6	101.8	96.9	111.2	3	3.51	0.00258	30.8935	49
AFTPFSGPK	1xTMT6plex [K9]; 1xTMT6plex [N-Term]	0.0397434	0.00241502	1	P12955	PEPD	Xaa-Pro dipeptidase OS=Homo sapiens OX=9606 GN=PEPD PE=1 SV=3	0	1409.82	95.6	101.9	101.1	93.5	94.5	113.5	3	1.65	0.00077	27.5069	14
AFTSWTANTGIEACR	1xCarbamidomethyl [C14]; 1xTMT6plex [N-Term]	1.03816e-06	0	1	Q15067	ACOX1	Peroxisomal acyl-coenzyme A oxidase 1 OS=Homo sapiens OX=9606 GN=ACOX1 PE=1 SV=3	0	1913.94	93	87.1	93.7	112.3	105.5	108.4	2	4.38	0.00419	31.5043	45
AFTVDSPVQQALWCDFIISQDK	1xCarbamidomethyl [C14]; 1xTMT6plex [K22]; 1xTMT6plex [N-Term]	3.9552e-07	0	1	Q9H1A4	ANAPC1	Anaphase-promoting complex subunit 1 OS=Homo sapiens OX=9606 GN=ANAPC1 PE=1 SV=1	0	3026.57	84.3	101.7	96.3	103.4	104.7	109.6	3	-4.69	-0.00473	53.2521	36
AFTYINLDK	1xTMT6plex [K9]; 1xTMT6plex [N-Term]	0.000150851	2.77511e-05	1	P02786	TFRC	Transferrin receptor protein 1 OS=Homo sapiens OX=9606 GN=TFRC PE=1 SV=2	0	1542.89	104	94.6	108	97.7	101.5	94.2	2	1.45	0.00112	34.1182	44
AFVAGVLPFK	1xTMT6plex [K10]; 1xTMT6plex [N-Term]	0.000134644	2.77511e-05	2	O00442	RTCA	RNA 3'-terminal phosphate cyclase OS=Homo sapiens OX=9606 GN=RTCA PE=1 SV=1	0	1506.94	107.6	104.3	98.7	96.3	95	98.1	2	1.72	0.0013	41.251	25
AFVAIGDYNGHVGLGVK	1xTMT6plex [K17]; 1xTMT6plex [N-Term]	5.22237e-09	0	3	P15880	RPS2	40S ribosomal protein S2 OS=Homo sapiens OX=9606 GN=RPS2 PE=1 SV=2	0	2175.23	97.9	96.2	100.2	106.7	100.9	98.1	2	3.29	0.00357	32.9446	74
AFVDFLSDEIK	1xTMT6plex [K11]; 1xTMT6plex [N-Term]	4.84067e-06	0	2	Q07021	C1QBP	Complement component 1 Q subcomponent-binding protein, mitochondrial OS=Homo sapiens OX=9606 GN=C1QBP PE=1 SV=1	0	1741.98	110.3	103.1	104.5	94	92	96.1	2	-3.48	-0.00303	49.2244	66
AFVDFLSDEIKEER	1xTMT6plex [K11]; 1xTMT6plex [N-Term]	2.19253e-07	0	6	Q07021	C1QBP	Complement component 1 Q subcomponent-binding protein, mitochondrial OS=Homo sapiens OX=9606 GN=C1QBP PE=1 SV=1	1	2156.16	104.1	103.2	101.7	98.8	94.9	97.5	2	5.17	0.00557	44.3945	54
AFVDFNEGEIK	1xTMT6plex [K11]; 1xTMT6plex [N-Term]	9.64056e-06	0	1	Q01968	OCRL	Inositol polyphosphate 5-phosphatase OCRL OS=Homo sapiens OX=9606 GN=OCRL PE=1 SV=3	0	1726.94	103.3	107	95.2	98.1	98.7	97.7	2	1.75	0.00151	34.0953	49
AFVDNYK	1xTMT6plex [K7]; 1xTMT6plex [N-Term]	0.0144435	0.00122622	1	Q12979	ABR	Active breakpoint cluster region-related protein OS=Homo sapiens OX=9606 GN=ABR PE=1 SV=2	0	1314.75	100.4	94.4	96.4	102.3	98.2	108.3	2	2.3	0.00151	21.997	16
AFVEAQNK	1xTMT6plex [K8]; 1xTMT6plex [N-Term]	0.00128025	0.000142151	1	P48147	PREP	Prolyl endopeptidase OS=Homo sapiens OX=9606 GN=PREP PE=1 SV=2	0	1364.79	104.8	104.9	94.4	99.4	100.2	96.3	2	2.45	0.00167	16.6324	28
AFVEATFQR	1xTMT6plex [N-Term]	0.000363326	3.92285e-05	1	Q9NVU0	POLR3E	DNA-directed RNA polymerase III subunit RPC5 OS=Homo sapiens OX=9606 GN=POLR3E PE=1 SV=1	0	1297.71	101.6	95.6	98.8	103.4	97.5	103.2	2	2.67	0.00173	25.1512	23
AFVELTK	1xTMT6plex [K7]; 1xTMT6plex [N-Term]	0.00582547	0.000404561	1	O95394	PGM3	Phosphoacetylglucosamine mutase OS=Homo sapiens OX=9606 GN=PGM3 PE=1 SV=1	0	1265.79	98	95.9	95	108.4	106.8	95.9	2	1.81	0.00114	27.3409	38
AFVENNPAIK	1xTMT6plex [K10]; 1xTMT6plex [N-Term]	4.43983e-05	1.80381e-05	1	Q9P2G1	ANKIB1	Ankyrin repeat and IBR domain-containing protein 1 OS=Homo sapiens OX=9606 GN=ANKIB1 PE=1 SV=3	0	1560.91	95.9	83.1	93	128.5	97.1	102.4	2	3.5	0.00273	22.8978	43
AFVENYPQFK	1xTMT6plex [K10]; 1xTMT6plex [N-Term]	4.8944e-05	1.80381e-05	2	Q9NRW7	VPS45	Vacuolar protein sorting-associated protein 45 OS=Homo sapiens OX=9606 GN=VPS45 PE=1 SV=1	0	1700.94	87.2	93	92.2	113.1	108.4	106.1	2	2.15	0.00183	31.5174	48
AFVESQQK	1xTMT6plex [K8]; 1xTMT6plex [N-Term]	0.00106927	0.000132543	2	Q9UPN3	MACF1	Microtubule-actin cross-linking factor 1, isoforms 1/2/3/5 OS=Homo sapiens OX=9606 GN=MACF1 PE=1 SV=4	0	1394.8	97.7	97	91.5	102.9	108.3	102.5	2	1.39	0.00097	15.6491	32
AFVGFEYEDSR	1xTMT6plex [N-Term]	0.00711386	0.000514297	1	Q8ND04	SMG8	Protein SMG8 OS=Homo sapiens OX=9606 GN=SMG8 PE=1 SV=1	0	1548.75							2	1.36	0.00105	30.608	3
AFVHWYVGEGMEEGEFSEAR	1xTMT6plex [N-Term]	5.14819e-09	0	47	Q71U36; Q9NY65; Q9BQE3; P68366	TUBA1A; TUBA8; TUBA1C; TUBA4A	Tubulin alpha-1A chain OS=Homo sapiens OX=9606 GN=TUBA1A PE=1 SV=1;Tubulin alpha-8 chain OS=Homo sapiens OX=9606 GN=TUBA8 PE=1 SV=1;Tubulin alpha-1C chain OS=Homo sapiens OX=9606 GN=TUBA1C PE=1 SV=1;Tubulin alpha-4A chain OS=Homo sapiens OX=9606 GN=TUBA4A PE=1 SV=1	0	2559.18	98.2	98.4	97.6	101.3	98.2	106.3	3	4.6	0.00393	37.4256	101
AFVHWYVGEGMEEGEFSEAR	1xOxidation [M11]; 1xTMT6plex [N-Term]	1.49011e-07	0	9	Q71U36; Q9NY65; Q9BQE3; P68366	TUBA1A; TUBA8; TUBA1C; TUBA4A	Tubulin alpha-1A chain OS=Homo sapiens OX=9606 GN=TUBA1A PE=1 SV=1;Tubulin alpha-8 chain OS=Homo sapiens OX=9606 GN=TUBA8 PE=1 SV=1;Tubulin alpha-1C chain OS=Homo sapiens OX=9606 GN=TUBA1C PE=1 SV=1;Tubulin alpha-4A chain OS=Homo sapiens OX=9606 GN=TUBA4A PE=1 SV=1	0	2575.18	97.3	97.8	97	104.4	97.1	106.4	2	1.6	0.00206	33.1834	60
AFVNLPTENELTFNAEEYSDISEMR	1xTMT6plex [N-Term]	4.05383e-08	0	2	Q9Y2A7	NCKAP1	Nck-associated protein 1 OS=Homo sapiens OX=9606 GN=NCKAP1 PE=1 SV=1	0	3148.5	102.2	104.3	98	96.9	94.5	104.1	3	7.65	0.00803	50.4506	95
AFVPAILFK	1xTMT6plex [K9]; 1xTMT6plex [N-Term]	0.00724405	0.000523654	1	Q9HAU5	UPF2	Regulator of nonsense transcripts 2 OS=Homo sapiens OX=9606 GN=UPF2 PE=1 SV=1	0	1463.94							2	3.16	0.00231	46.0633	21
AFVPPLAEDLLAR	1xTMT6plex [N-Term]	6.00468e-05	1.80381e-05	3	Q96P48	ARAP1	Arf-GAP with Rho-GAP domain, ANK repeat and PH domain-containing protein 1 OS=Homo sapiens OX=9606 GN=ARAP1 PE=1 SV=3	0	1640.96	108.7	103.4	108.9	92.7	89	97.3	3	4.24	0.00232	48.3008	52
AFVSMVYSEEGAEDR	1xTMT6plex [N-Term]	2.82621e-07	0	2	Q14683	SMC1A	Structural maintenance of chromosomes protein 1A OS=Homo sapiens OX=9606 GN=SMC1A PE=1 SV=2	0	1918.91	107.6	103.6	102.7	92.4	97.4	96.3	2	2.63	0.00252	33.8923	61
AFVVLAAPFK	1xTMT6plex [K10]; 1xTMT6plex [N-Term]	0.115008	0.00458226	1	P0C7M7	ACSM4	Acyl-coenzyme A synthetase ACSM4, mitochondrial OS=Homo sapiens OX=9606 GN=ACSM4 PE=2 SV=1	0	1520.96	105.1	101.3	107.9	98.7	93.7	93.3	3	3.02	0.00153	43.7111	3
AFWAGGSPSVVDYFPSEDFYR	1xAcetyl [N-Term]; 1xTMT6plex [N-Term]	0.00147206	0.000153798	1	O95260	ATE1	Arginyl-tRNA--protein transferase 1 OS=Homo sapiens OX=9606 GN=ATE1 PE=1 SV=2	0	2668.26							3	-85876.8	-76.3804	54.8254	48
AFYAELYHIISSNLEK	1xTMT6plex [K16]; 1xTMT6plex [N-Term]	7.12076e-06	0	1	Q9UL46	PSME2	Proteasome activator complex subunit 2 OS=Homo sapiens OX=9606 GN=PSME2 PE=1 SV=4	0	2356.3	100.2	139.1	110.7	84.4	84.8	80.7	3	2.24	0.00176	52.4342	30
AFYAPVHADDLR	1xTMT6plex [N-Term]	0.0119497	0.000989726	1	P55011	SLC12A2	Solute carrier family 12 member 2 OS=Homo sapiens OX=9606 GN=SLC12A2 PE=1 SV=1	0	1603.84							3	0.87	0.00046	22.103	1
AFYECLAACEGSR	2xCarbamidomethyl [C5; C9]; 1xTMT6plex [N-Term]	1.7129e-05	0	1	O75718	CRTAP	Cartilage-associated protein OS=Homo sapiens OX=9606 GN=CRTAP PE=1 SV=1	0	1762.81							2	3.12	0.00275	28.6108	30
AFYGDTLVTGFAR	1xTMT6plex [N-Term]	6.89791e-06	0	2	Q9HCC0	MCCC2	Methylcrotonoyl-CoA carboxylase beta chain, mitochondrial OS=Homo sapiens OX=9606 GN=MCCC2 PE=1 SV=1	0	1646.87	101.1	106.6	98.3	99.3	94.6	100.1	2	-0.61	-0.0005	37.7571	38
AFYLEAR	1xTMT6plex [N-Term]	0.0113752	0.000965224	1	Q8WUY1	THEM6	Protein THEM6 OS=Homo sapiens OX=9606 GN=THEM6 PE=1 SV=2	0	1098.61	112.1	106.5	103.5	88.9	94.5	94.4	2	4.26	0.00234	23.3212	34
AFYMEEGVPYCER	1xCarbamidomethyl [C11]; 1xTMT6plex [N-Term]	6.38482e-05	2.77511e-05	2	Q9NR12	PDLIM7	PDZ and LIM domain protein 7 OS=Homo sapiens OX=9606 GN=PDLIM7 PE=1 SV=1	0	1879.86	98.8	89.4	104.8	99.5	102	105.4	3	2.11	0.00132	30.666	24
AFYNNVLGEYEEYITK	1xTMT6plex [K16]; 1xTMT6plex [N-Term]	8.19549e-09	0	2	P04181	OAT	Ornithine aminotransferase, mitochondrial OS=Homo sapiens OX=9606 GN=OAT PE=1 SV=1	0	2411.25	97.1	103.1	94.2	102.9	106.8	95.9	2	3.02	0.00365	50.4938	69
AFYPEEISSMVLTK	1xTMT6plex [K14]; 1xTMT6plex [N-Term]	3.40219e-08	0	5	P0DMV8	HSPA1A	Heat shock 70 kDa protein 1A OS=Homo sapiens OX=9606 GN=HSPA1A PE=1 SV=1	0	2073.13	93.8	103	189.3	62.4	71.8	79.8	2	3.69	0.00383	47.0843	77
AFYPEEISSMVLTK	1xOxidation [M10]; 1xTMT6plex [K14]; 1xTMT6plex [N-Term]	0.000796635	7.57932e-05	4	P0DMV8	HSPA1A	Heat shock 70 kDa protein 1A OS=Homo sapiens OX=9606 GN=HSPA1A PE=1 SV=1	0	2089.13	98.9	104.6	126.6	86.1	86.7	97.1	3	0.54	0.00038	39.9162	51
AFYVNVLNEEQR	1xTMT6plex [N-Term]	2.49776e-06	0	3	P04040	CAT	Catalase OS=Homo sapiens OX=9606 GN=CAT PE=1 SV=3	0	1710.9	99.3	101.4	97.9	110.3	93.5	97.5	2	2.31	0.00197	32.9849	49
AFYVPAQYVK	1xTMT6plex [K10]; 1xTMT6plex [N-Term]	0.00170455	0.000174676	1	Q8IWW6	ARHGAP12	Rho GTPase-activating protein 12 OS=Homo sapiens OX=9606 GN=ARHGAP12 PE=1 SV=1	0	1643.96	97.8	100.5	98.7	102.5	100.1	100.4	2	4.06	0.00334	32.818	24
AGAAGGPEEEAEKPVK	2xTMT6plex [K13; K16]; 1xTMT6plex [N-Term]	5.26474e-07	0	2	Q8WW12	PCNP	PEST proteolytic signal-containing nuclear protein OS=Homo sapiens OX=9606 GN=PCNP PE=1 SV=2	0	2227.25	99.8	108.4	100.3	98	97	96.5	3	1.55	0.00115	14.9189	28
AGAAPYVQAFDSLLAGPVAEYLK	1xTMT6plex [K23]; 1xTMT6plex [N-Term]	4.56326e-07	0	5	Q01518	CAP1	Adenylyl cyclase-associated protein 1 OS=Homo sapiens OX=9606 GN=CAP1 PE=1 SV=5	0	2809.55	98.2	104.4	101.6	97	102.8	96	2	3.64	0.00511	54.4931	86
AGAASLDVIQEVEYVKEEAK	2xTMT6plex [K16; K20]; 1xTMT6plex [N-Term]	2.87719e-07	0	1	Q9UJV9	DDX41	Probable ATP-dependent RNA helicase DDX41 OS=Homo sapiens OX=9606 GN=DDX41 PE=1 SV=2	1	2836.59	108.8	100.9	114	92.9	92.8	90.6	4	5.72	0.00405	46.2828	27
AGADIELGCSTPLMEAAQEGHLELVK	1xCarbamidomethyl [C9]; 1xTMT6plex [K26]; 1xTMT6plex [N-Term]	2.63117e-05	0	1	O75179	ANKRD17	Ankyrin repeat domain-containing protein 17 OS=Homo sapiens OX=9606 GN=ANKRD17 PE=1 SV=3	0	3197.66							3	1.72	0.00183	42.6082	13
AGAEDDEEKGEGTPR	1xTMT6plex [K9]; 1xTMT6plex [N-Term]	3.18137e-05	0	1	Q86VM9	ZC3H18	Zinc finger CCCH domain-containing protein 18 OS=Homo sapiens OX=9606 GN=ZC3H18 PE=1 SV=2	1	2019	104.7	100	104	90.9	96.4	104	3	4.71	0.00317	9.4657	22
AGAEGFVR	1xTMT6plex [N-Term]	0.0128129	0.0010625	1	Q9BUP3	HTATIP2	Oxidoreductase HTATIP2 OS=Homo sapiens OX=9606 GN=HTATIP2 PE=1 SV=2	0	1035.58	90.3	86.8	95	119.4	106.9	101.7	2	1.84	0.00095	13.5142	28
AGAEVVK	1xTMT6plex [K7]; 1xTMT6plex [N-Term]	0.00946637	0.000717013	2	P54577	YARS	Tyrosine--tRNA ligase, cytoplasmic OS=Homo sapiens OX=9606 GN=YARS PE=1 SV=4	0	1131.71	105.5	101	98.2	95.3	101.6	98.3	2	2.17	0.00123	12.5942	21
AGAGAPELLR	1xTMT6plex [N-Term]	3.3315e-05	0	1	Q00653	NFKB2	Nuclear factor NF-kappa-B p100 subunit OS=Homo sapiens OX=9606 GN=NFKB2 PE=1 SV=4	0	1183.7	105.5	97.1	101.2	103.6	95.3	97.3	2	1.85	0.0011	18.303	46
AGAGGGNDIQWCFSQVK	1xAcetyl [N-Term]; 1xCarbamidomethyl [C12]; 1xTMT6plex [K17]; 1xTMT6plex [N-Term]	0.00386889	0.000283562	2	P63151	PPP2R2A	Serine/threonine-protein phosphatase 2A 55 kDa regulatory subunit B alpha isoform OS=Homo sapiens OX=9606 GN=PPP2R2A PE=1 SV=1	0	2295.16	96	102.5	104.5	98.7	98	100.3	2	-99844.4	-114.579	40.3274	53
AGAGLGDGER	1xTMT6plex [N-Term]	0.000145009	2.77511e-05	1	Q9BXP5	SRRT	Serrate RNA effector molecule homolog OS=Homo sapiens OX=9606 GN=SRRT PE=1 SV=1	0	1131.6							2	1.78	0.00101	9.7609	41
AGAGPGGPPQKPAPSSQR	1xTMT6plex [K11]; 1xTMT6plex [N-Term]	7.04229e-05	2.77511e-05	1	Q9Y5J1	UTP18	U3 small nucleolar RNA-associated protein 18 homolog OS=Homo sapiens OX=9606 GN=UTP18 PE=1 SV=3	0	2118.18							3	4.66	0.00329	10.3089	4
AGAGSAAVSGAGTPVAGPTGR	1xAcetyl [N-Term]; 1xTMT6plex [N-Term]	2.89922e-05	0	1	O95295	SNAPIN	SNARE-associated protein Snapin OS=Homo sapiens OX=9606 GN=SNAPIN PE=1 SV=1	0	1983.05							2	-115559	-114.579	18.9823	63
AGAGSATLSMAYAGAR	1xTMT6plex [N-Term]	4.73858e-10	0	6	P40926	MDH2	Malate dehydrogenase, mitochondrial OS=Homo sapiens OX=9606 GN=MDH2 PE=1 SV=3	0	1683.87	97.8	99.8	96.6	104.2	101.1	100.6	2	1.74	0.00147	22.515	93
AGAGSATLSMAYAGAR	1xOxidation [M10]; 1xTMT6plex [N-Term]	2.29105e-05	0	2	P40926	MDH2	Malate dehydrogenase, mitochondrial OS=Homo sapiens OX=9606 GN=MDH2 PE=1 SV=3	0	1699.86	93	101.6	103.1	99.6	105	97.8	2	1.63	0.00139	17.5043	87
AGAGYILEDFNEAQCNTAYQCLLIADQHCR	3xCarbamidomethyl [C15; C21; C29]; 1xTMT6plex [N-Term]	2.94256e-06	0	1	Q12888	TP53BP1	TP53-binding protein 1 OS=Homo sapiens OX=9606 GN=TP53BP1 PE=1 SV=2	0	3730.72							4	0.2	0.00019	45.0761	32
AGAHLQGGAK	1xTMT6plex [K10]; 1xTMT6plex [N-Term]	3.22363e-05	0	6	P04406	GAPDH	Glyceraldehyde-3-phosphate dehydrogenase OS=Homo sapiens OX=9606 GN=GAPDH PE=1 SV=3	0	1367.82	98.9	100.2	94.1	102.1	103.8	101	2	0.99	0.00068	8.5837	46
AGAKPDQIGIITPYEGQR	1xTMT6plex [K4]; 1xTMT6plex [N-Term]	1.3676e-05	0	1	Q92900	UPF1	Regulator of nonsense transcripts 1 OS=Homo sapiens OX=9606 GN=UPF1 PE=1 SV=2	0	2372.33	99.6	97.3	104.9	106	94.8	97.5	3	5.33	0.00422	24.8251	27
AGAIAPCEVTVPAQNTGLGPEK	1xCarbamidomethyl [C7]; 1xTMT6plex [K22]; 1xTMT6plex [N-Term]	2.75498e-08	0	3	P05388	RPLP0	60S acidic ribosomal protein P0 OS=Homo sapiens OX=9606 GN=RPLP0 PE=1 SV=1	0	2638.43	105.1	100.7	96.9	100.6	101.2	95.5	2	5.21	0.00688	29.5376	85
AGALHAQVER	1xTMT6plex [N-Term]	8.26665e-05	2.77511e-05	2	Q9BQG0	MYBBP1A	Myb-binding protein 1A OS=Homo sapiens OX=9606 GN=MYBBP1A PE=1 SV=2	0	1280.73	104.9	98.9	101.4	98.1	98.3	98.5	2	1.12	0.00072	9.0774	31
AGALLPAIHEQLR	1xTMT6plex [N-Term]	2.6937e-05	0	1	O15230	LAMA5	Laminin subunit alpha-5 OS=Homo sapiens OX=9606 GN=LAMA5 PE=1 SV=8	0	1617.96	103.8	95.7	99	103.2	100.9	97.4	3	2.86	0.00154	25.3109	12
AGALNSNDAFVLK	1xTMT6plex [K13]; 1xTMT6plex [N-Term]	2.81612e-07	0	2	P06396	GSN	Gelsolin OS=Homo sapiens OX=9606 GN=GSN PE=1 SV=1	0	1778.02	93.8	100	86.8	108.3	107.1	104	2	3.31	0.00295	30.8471	61
AGALQCSPSDAYTK	1xCarbamidomethyl [C6]; 1xTMT6plex [K14]; 1xTMT6plex [N-Term]	1.33303e-06	0	2	Q9Y490	TLN1	Talin-1 OS=Homo sapiens OX=9606 GN=TLN1 PE=1 SV=3	0	1927	97.3	97.7	90.8	106.6	103.2	104.4	2	2.48	0.00239	19.6129	84
AGAISASGPELQGAGHSK	1xTMT6plex [K18]; 1xTMT6plex [N-Term]	3.90891e-09	0	2	Q09666	AHNAK	Neuroblast differentiation-associated protein AHNAK OS=Homo sapiens OX=9606 GN=AHNAK PE=1 SV=2	0	2096.15	92.2	100.7	93.5	102.7	107.7	103.3	2	1.47	0.00154	15.7834	104
AGAPLPVPR	1xTMT6plex [N-Term]	0.0216831	0.00173262	1	Q92908	GATA6	Transcription factor GATA-6 OS=Homo sapiens OX=9606 GN=GATA6 PE=1 SV=2	0	1106.69	90.8	106.1	126.9	89.9	91.8	94.5	2	3.69	0.00204	16.5271	15
AGAPWHLR	1xTMT6plex [N-Term]	0.00089502	9.98689e-05	1	Q9BUE0	MED18	Mediator of RNA polymerase II transcription subunit 18 OS=Homo sapiens OX=9606 GN=MED18 PE=1 SV=1	0	1136.65	108.7	105.3	110.2	94.4	91.3	90.1	3	2.49	0.00094	15.0627	41
AGAQPGVHALQLEPPTVVETLR	1xAcetyl [N-Term]; 1xTMT6plex [N-Term]	1.41598e-05	0	3	Q01970	PLCB3	1-phosphatidylinositol 4,5-bisphosphate phosphodiesterase beta-3 OS=Homo sapiens OX=9606 GN=PLCB3 PE=1 SV=2	0	2554.42							2	-89709	-114.577	37.7098	67
AGASELGTGPGAAGGDGDDSLYPIAVLIDELR	1xAcetyl [N-Term]; 1xTMT6plex [N-Term]	5.82272e-05	1.80381e-05	1	P30154	PPP2R1B	Serine/threonine-protein phosphatase 2A 65 kDa regulatory subunit A beta isoform OS=Homo sapiens OX=9606 GN=PPP2R1B PE=1 SV=3	0	3328.67							3	-68842.5	-76.3847	55.7132	64
AGASISTLAGLSLK	1xTMT6plex [K14]; 1xTMT6plex [N-Term]	3.74683e-05	0	2	Q9UJW0	DCTN4	Dynactin subunit 4 OS=Homo sapiens OX=9606 GN=DCTN4 PE=1 SV=1	0	1747.07	106.4	103.9	105.3	95.8	91.6	96.9	3	3.68	0.00214	37.9542	28
AGASLWGGLR	1xTMT6plex [N-Term]	0.00033725	3.92285e-05	1	P08648	ITGA5	Integrin alpha-5 OS=Homo sapiens OX=9606 GN=ITGA5 PE=1 SV=2	0	1216.7	92.2	100.2	89.1	110.5	103.5	104.6	2	1.33	0.00081	27.9033	34
AGATAGK	1xTMT6plex [K7]; 1xTMT6plex [N-Term]	0.132976	0.00490285	1	P16402	H1-3	Histone H1.3 OS=Homo sapiens OX=9606 GN=H1-3 PE=1 SV=2	0	1033.64							2	1.59	0.00082	7.6849	17
AGATASK	1xTMT6plex [K7]; 1xTMT6plex [N-Term]	0.204769	0.00675377	1	Q86XL3	ANKLE2	Ankyrin repeat and LEM domain-containing protein 2 OS=Homo sapiens OX=9606 GN=ANKLE2 PE=1 SV=4	0	1063.65							2	2.06	0.00109	7.9027	18
AGATLDLLVENMGR	1xTMT6plex [N-Term]	1.91395e-07	0	2	P16278	GLB1	Beta-galactosidase OS=Homo sapiens OX=9606 GN=GLB1 PE=1 SV=2	0	1688.92	103.9	97.5	99.9	105	98	95.7	2	2.28	0.00192	43.4117	38
AGAVASQTK	1xTMT6plex [K9]; 1xTMT6plex [N-Term]	0.000450204	3.92285e-05	1	Q13428	TCOF1	Treacle protein OS=Homo sapiens OX=9606 GN=TCOF1 PE=1 SV=3	0	1290.78							2	1.19	0.00077	10.0719	35
AGAVNPTVK	1xTMT6plex [K9]; 1xTMT6plex [N-Term]	0.0111433	0.00089687	1	P27487	DPP4	Dipeptidyl peptidase 4 OS=Homo sapiens OX=9606 GN=DPP4 PE=1 SV=2	0	1314.81							2	0.61	0.0004	13.9432	13
AGAVSALAK	1xTMT6plex [K9]; 1xTMT6plex [N-Term]	8.60871e-05	2.77511e-05	1	Q9Y678	COPG1	Coatomer subunit gamma-1 OS=Homo sapiens OX=9606 GN=COPG1 PE=1 SV=1	0	1245.79	98.2	91	93.6	107.3	107.3	102.6	2	3.56	0.00222	18.5663	48
AGAVVAVPTDTLYGLACAASCSAALR	2xCarbamidomethyl [C17; C21]; 1xTMT6plex [N-Term]	6.89791e-06	0	1	Q86U90	YRDC	YrdC domain-containing protein, mitochondrial OS=Homo sapiens OX=9606 GN=YRDC PE=1 SV=1	0	2794.44	107.8	90.8	86.3	101.5	106.4	107.2	3	6.2	0.00578	49.8856	57
AGAYDFPSPEWDTVTPEAK	1xTMT6plex [K19]; 1xTMT6plex [N-Term]	1.40129e-05	0	1	Q13557; Q13555	CAMK2D; CAMK2G	Calcium/calmodulin-dependent protein kinase type II subunit delta OS=Homo sapiens OX=9606 GN=CAMK2D PE=1 SV=3;Calcium/calmodulin-dependent protein kinase type II subunit gamma OS=Homo sapiens OX=9606 GN=CAMK2G PE=1 SV=4	0	2539.28	92.3	95.6	92.8	107.7	106.8	104.7	3	2.23	0.00188	39.2595	44
AGCAVTSLLASELTK	1xCarbamidomethyl [C3]; 1xTMT6plex [K15]; 1xTMT6plex [N-Term]	9.94144e-09	0	2	O60610	DIAPH1	Protein diaphanous homolog 1 OS=Homo sapiens OX=9606 GN=DIAPH1 PE=1 SV=2	0	1979.12	93.5	99.3	100.7	100.3	105.5	100.8	2	2.75	0.00272	43.0555	93
AGCDEIWEK	1xCarbamidomethyl [C3]; 1xTMT6plex [K9]; 1xTMT6plex [N-Term]	0.000402348	3.92285e-05	1	Q5MIZ7; Q6IN85	PPP4R3B; PPP4R3A	Serine/threonine-protein phosphatase 4 regulatory subunit 3B OS=Homo sapiens OX=9606 GN=PPP4R3B PE=1 SV=2;Serine/threonine-protein phosphatase 4 regulatory subunit 3A OS=Homo sapiens OX=9606 GN=PPP4R3A PE=1 SV=1	0	1565.8	105.9	97.5	108.9	95.8	98.9	93	2	2.18	0.00171	25.0395	26
AGCDGNLGSK	1xCarbamidomethyl [C3]; 1xTMT6plex [K10]; 1xTMT6plex [N-Term]	0.103495	0.00435218	1	Q8TE58	ADAMTS15	A disintegrin and metalloproteinase with thrombospondin motifs 15 OS=Homo sapiens OX=9606 GN=ADAMTS15 PE=2 SV=1	0	1436.76	100.2	102.5	97	99.9	99.1	101.3	2	-2.73	-0.00196	12.0947	5
AGCECLNESDEHGFDNCLR	3xCarbamidomethyl [C3; C5; C17]; 1xTMT6plex [N-Term]	1.67579e-08	0	1	O43396	TXNL1	Thioredoxin-like protein 1 OS=Homo sapiens OX=9606 GN=TXNL1 PE=1 SV=3	0	2512.05	108.2	94.5	109	100.5	90.8	96.9	3	3.32	0.00278	19.9003	68
AGCEVTILFADLHAYLDNMK	1xCarbamidomethyl [C3]; 1xTMT6plex [K20]; 1xTMT6plex [N-Term]	3.06504e-09	0	2	P54577	YARS	Tyrosine--tRNA ligase, cytoplasmic OS=Homo sapiens OX=9606 GN=YARS PE=1 SV=4	0	2739.43	116.7	121.1	106.9	85.3	89.5	80.5	3	5.8	0.00529	53.7795	71
AGCIVCNTLINEK	2xCarbamidomethyl [C3; C6]; 1xTMT6plex [K13]; 1xTMT6plex [N-Term]	7.41986e-07	0	1	O00214	LGALS8	Galectin-8 OS=Homo sapiens OX=9606 GN=LGALS8 PE=1 SV=4	0	1950.06	103.9	95.8	111.2	104.3	95.9	88.9	2	-0.46	-0.00045	29.0137	58
AGDAFGDTSFLNSK	1xTMT6plex [K14]; 1xTMT6plex [N-Term]	0.000120209	2.77511e-05	1	Q9H3Q1	CDC42EP4	Cdc42 effector protein 4 OS=Homo sapiens OX=9606 GN=CDC42EP4 PE=1 SV=1	0	1887.99	102.3	102.5	107.9	96.9	93.6	96.8	3	3.49	0.0022	33.8536	39
AGDEFVEK	1xTMT6plex [K8]; 1xTMT6plex [N-Term]	0.00167956	0.000174676	1	Q16836	HADH	Hydroxyacyl-coenzyme A dehydrogenase, mitochondrial OS=Homo sapiens OX=9606 GN=HADH PE=1 SV=3	0	1352.75	107.2	106.7	97.3	96	96.1	96.7	2	4.74	0.0032	19.2914	32
AGDEKPEK	2xTMT6plex [K5; K8]; 1xTMT6plex [N-Term]	0.224555	0.0072302	1	Q8WW12	PCNP	PEST proteolytic signal-containing nuclear protein OS=Homo sapiens OX=9606 GN=PCNP PE=1 SV=2	0	1560.92	103.8	109.8	100.7	96.4	96.8	92.6	2	0.58	0.00046	9.9344	16
AGDELTK	1xTMT6plex [K7]; 1xTMT6plex [N-Term]	0.0303268	0.0020481	1	Q9UNF0	PACSIN2	Protein kinase C and casein kinase substrate in neurons protein 2 OS=Homo sapiens OX=9606 GN=PACSIN2 PE=1 SV=2	0	1191.7	105.8	103.6	103.4	94.4	96.1	96.7	2	1.54	0.00092	13.9116	18
AGDELTKMEDEDEQGWCK	1xCarbamidomethyl [C17]; 2xTMT6plex [K7; K18]; 1xTMT6plex [N-Term]	7.34074e-07	0	2	Q9UNF0	PACSIN2	Protein kinase C and casein kinase substrate in neurons protein 2 OS=Homo sapiens OX=9606 GN=PACSIN2 PE=1 SV=2	1	2828.37	104.1	103.4	103.3	95.2	95.6	98.3	3	3.45	0.00325	31.4337	19
AGDFLEANYMNLQR	1xTMT6plex [N-Term]	5.84068e-05	1.80381e-05	1	P01024	C3	Complement C3 OS=Homo sapiens OX=9606 GN=C3 PE=1 SV=2	0	1870.93	96.4	102.6	96.4	103.6	94	107	3	3.93	0.00245	37.4458	32
AGDGDGWVSLAELR	1xTMT6plex [N-Term]	5.79819e-07	0	1	Q96D15	RCN3	Reticulocalbin-3 OS=Homo sapiens OX=9606 GN=RCN3 PE=1 SV=1	0	1674.86	103.1	102.4	101.3	95.6	94.1	103.5	2	2.44	0.00204	38.296	31
AGDKDDITEPAVCALR	1xCarbamidomethyl [C13]; 1xTMT6plex [K4]; 1xTMT6plex [N-Term]	1.67077e-07	0	1	P14923	JUP	Junction plakoglobin OS=Homo sapiens OX=9606 GN=JUP PE=1 SV=3	1	2189.16	87.7	93.6	77.3	120.7	107.8	112.9	3	3.39	0.00247	23.276	28
AGDIALLYLQEIER	1xTMT6plex [N-Term]	8.39632e-05	2.77511e-05	1	Q86TV6	TTC7B	Tetratricopeptide repeat protein 7B OS=Homo sapiens OX=9606 GN=TTC7B PE=1 SV=3	0	1833.03	96.7	118.7	105	97.7	86.8	95.2	3	3.74	0.00229	51.2206	41
AGDLLEDSPK	1xTMT6plex [K10]; 1xTMT6plex [N-Term]	0.000164695	2.77511e-05	1	P51858	HDGF	Hepatoma-derived growth factor OS=Homo sapiens OX=9606 GN=HDGF PE=1 SV=1	0	1502.85	98.7	109.6	105	89.4	103.5	93.7	2	1.27	0.00096	23.8403	50
[truncated: 57,111 more rows]
